# Supplementary material
Source: publisher figshare collection journal article supplement (https://gsajournals.figshare.com/ndownloader/files/27404918)
Supplement: Supplementary file 1 [file 27404918]

## Sheet: 01.Maize
SNP01	SNP02	REMMA	Q+K	Q+2K
S10_10246090	S2_5838435	0.015	0.000868	0.0114
S10_10246090	S3_200187159	0.012	0.000426	0.00781
S10_10246090	S4_236394828	0.00439	3.13e-05	0.00388
S10_10246090	S5_1340738	0.0175	0.000196	0.0107
S10_10246090	S6_93731500	0.00834	0.00099	0.00675
S10_10615094	S1_154079997	0.00643	0.000586	0.00497
S10_10615094	S1_290820556	0.0213	0.000488	0.0141
S10_10615094	S2_143485578	0.00439	0.000477	0.0035
S10_10615094	S3_220849518	0.017	0.000603	0.017
S10_10615094	S5_210051701	0.00822	0.000506	0.00555
S10_10669561	S1_5998037	0.0178	0.000416	0.0153
S10_10669561	S2_236485859	0.0169	0.000331	0.0118
S10_10669561	S2_6338854	0.00371	0.000223	0.00183
S10_10669561	S6_153784458	0.022	0.000573	0.0117
S10_10669561	S6_165586391	0.0019	0.000687	0.00173
S10_10669561	S7_163575325	0.00386	0.000309	0.00388
S10_10669561	S7_2614868	0.00531	0.000389	0.00508
S10_10669561	S7_6297685	0.00337	0.000856	0.00233
S10_10669561	S8_1640711	0.00317	0.000871	0.00297
S10_10669561	S9_141472685	0.00853	0.000455	0.00781
S10_10669561	S9_149552629	0.00287	0.000971	0.00298
S10_110957217	S1_189190087	4.52e-05	0.000114	5.14e-05
S10_110957217	S1_71130037	0.000852	0.00057	0.00151
S10_110957217	S2_211792433	0.00195	0.000941	0.00187
S10_110957217	S2_219124465	0.000984	0.00201	0.00216
S10_110957217	S4_174915420	0.000171	0.000329	0.000349
S10_110957217	S4_236406919	0.00121	0.000228	0.00116
S10_110957217	S4_239488760	0.00354	0.000544	0.0027
S10_110957217	S5_8336164	0.0149	0.00089	0.014
S10_110957217	S6_155392451	5.84e-05	0.000156	3.77e-05
S10_110957217	S7_173525965	1.14e-05	1.66e-06	5.24e-06
S10_110957217	S8_6397888	8.47e-05	0.000103	5.91e-05
S10_110957217	S9_135834777	7.23e-05	0.000635	0.000203
S10_116891837	S1_295349423	0.00357	0.000162	0.00295
S10_116891837	S4_10651579	0.00491	0.000156	0.00335
S10_116891837	S5_3289163	0.00726	0.000287	0.00399
S10_116891837	S8_166796086	0.0642	0.000581	0.0456
S10_116891837	S9_154762530	0.0169	0.000852	0.0158
S10_119977539	S10_147392450	0.00472	0.000266	0.00209
S10_119977539	S10_147449161	0.00527	6.28e-05	0.00136
S10_119977539	S10_84758011	0.000557	0.0016	0.00099
S10_119977539	S1_258448383	0.00309	0.000521	0.0033
S10_119977539	S1_295349423	0.00272	0.00064	0.00378
S10_119977539	S1_300072619	0.000267	0.00195	0.0013
S10_119977539	S2_207379888	0.00151	6.64e-05	0.0031
S10_119977539	S2_209954819	0.00198	0.000995	0.00281
S10_119977539	S3_2116890	0.00453	4.23e-05	0.00366
S10_119977539	S3_38048567	0.00385	0.000138	0.00343
S10_119977539	S4_234466812	0.0123	0.000702	0.00694
S10_119977539	S6_154165681	0.000832	0.00024	0.000364
S10_119977539	S6_168093988	0.02	0.000732	0.0122
S10_119977539	S7_170621064	0.00134	0.000615	0.00037
S10_119977539	S7_28361010	0.000424	0.000137	0.000214
S10_119977539	S8_106851261	0.000405	0.000219	0.000869
S10_119977539	S8_170224601	0.038	0.000265	0.00116
S10_119977539	S9_59453957	3.23e-05	2.46e-05	0.000122
S10_121721009	S1_12990921	7.04e-05	0.000768	0.000114
S10_121721009	S1_288806057	0.00384	2.75e-05	0.00253
S10_121721009	S2_148717722	0.00455	0.000434	0.00311
S10_121721009	S2_228979822	0.00272	0.000751	0.0131
S10_121721009	S4_233070837	0.0017	0.000669	0.00129
S10_121721009	S4_3048559	0.000151	0.000103	0.000157
S10_121721009	S7_174574340	0.00824	0.000868	0.00661
S10_121721009	S9_153844399	0.0093	0.000886	0.0091
S10_121752518	S1_248286801	0.000654	0.000235	0.000424
S10_121752518	S1_296563130	3.28e-06	4.71e-07	5.77e-06
S10_121752518	S2_228859155	0.00394	6.46e-05	0.00102
S10_121752518	S2_230945484	0.00108	0.000286	0.000595
S10_121752518	S3_157570069	4.5e-05	3.24e-05	0.000225
S10_121752518	S3_169216129	0.000697	7.86e-05	0.0011
S10_121752518	S3_201263738	0.000778	0.000955	0.00126
S10_121752518	S4_171450667	0.000275	3.51e-05	6.19e-05
S10_121752518	S4_17375434	0.000433	0.00162	0.000652
S10_121752518	S4_178672969	0.00308	0.000921	0.00558
S10_121752518	S4_237954033	0.00284	5.6e-05	0.00208
S10_121752518	S5_175588693	0.000756	0.00165	0.0017
S10_121752518	S5_188779691	4.85e-05	1.51e-05	5.35e-05
S10_121752518	S5_69120089	0.00066	0.00399	0.00093
S10_121752518	S6_102756427	0.000723	0.000114	0.000705
S10_121752518	S6_155392451	0.00058	0.000288	0.000435
S10_121752518	S6_167576639	0.00937	0.00086	0.00576
S10_121752518	S8_171877741	0.00228	0.000763	0.00214
S10_121752518	S9_123240714	0.00391	0.00044	0.00278
S10_121752518	S9_144376310	0.0235	0.000824	0.0208
S10_121752518	S9_150249043	0.00309	0.000703	0.00105
S10_121752518	S9_6007138	0.000318	0.000103	0.000358
S10_126532488	S10_1716185	0.00106	0.000502	0.00188
S10_126532488	S1_264953740	0.0013	0.000189	0.000826
S10_126532488	S1_5998037	0.0012	0.000515	0.00127
S10_126532488	S2_222807803	0.00215	0.000862	0.00245
S10_126532488	S4_239488760	0.00192	0.000432	0.00216
S10_126532488	S4_41841994	0.00477	0.000512	0.00396
S10_126532488	S6_75749425	0.0298	0.000921	0.0266
S10_126532488	S7_2915205	0.00982	0.000923	0.00788
S10_127935588	S3_227050324	0.00116	0.00023	0.00144
S10_127935588	S5_208098757	0.00201	3.48e-05	0.00122
S10_127935588	S5_2139954	0.00245	1.81e-05	0.00181
S10_127935588	S7_162668459	0.00824	0.000664	0.0071
S10_127935588	S8_170224601	0.00258	4.31e-05	0.00241
S10_127935588	S9_142206898	0.00396	0.000446	0.0028
S10_127935588	S9_90366825	0.00324	0.000132	0.00255
S10_128965566	S10_147998269	0.000694	0.000663	0.000738
S10_128965566	S1_73102340	0.00995	4.96e-05	0.00469
S10_128965566	S7_167853871	0.000425	0.000111	0.000442
S10_128965566	S7_174282816	0.00689	0.00065	0.00681
S10_130138701	S10_148832565	0.000605	0.00215	0.000957
S10_130138701	S2_10535246	0.00972	0.000505	0.00888
S10_130138701	S2_228334001	0.000224	0.000198	0.000267
S10_130138701	S4_196467103	0.00511	8.71e-06	0.0012
S10_130138701	S4_234466812	0.000493	3.74e-05	0.000649
S10_130138701	S4_5886240	0.0154	0.000373	0.00902
S10_130138701	S5_195419440	1.02e-05	7.25e-06	7.74e-06
S10_130138701	S7_10761845	0.000937	3.79e-05	0.000656
S10_130138701	S7_161902188	0.00617	0.000181	0.00614
S10_130138701	S8_1831170	0.00777	0.000917	0.00757
S10_130302321	S1_264164784	0.000957	0.000416	0.00143
S10_130302321	S3_223537211	0.00768	0.000872	0.00357
S10_130302321	S3_30125641	0.00147	8.23e-05	0.00144
S10_130302321	S4_157631782	0.00671	0.00086	0.00684
S10_130302321	S4_17375434	0.00102	0.000122	0.000983
S10_130302321	S4_5709544	0.0303	0.000398	0.00992
S10_130302321	S5_200435117	0.0131	0.000946	0.01
S10_130302321	S7_124212537	0.00713	0.000852	0.00533
S10_130302321	S8_90967478	0.000826	0.000379	0.00105
S10_130302321	S9_142051997	0.0435	0.000492	0.0276
S10_130302321	S9_153784417	0.00144	0.000426	0.00292
S10_130822829	S1_17679542	6.39e-05	0.000185	9.82e-05
S10_130822829	S1_230720299	0.0224	0.000227	0.022
S10_130822829	S1_236951651	0.01	0.000491	0.00938
S10_130822829	S2_26287935	0.0165	0.000842	0.0124
S10_130822829	S3_183312517	0.00303	9.98e-05	0.00228
S10_130822829	S4_234714670	0.000373	6.65e-05	0.000213
S10_130822829	S4_236937890	0.0273	0.000907	0.0192
S10_130822829	S7_135815687	0.000441	0.000142	0.000679
S10_130822829	S7_173441882	0.0153	0.000719	0.0118
S10_132010081	S1_241001276	0.017	0.000206	0.0129
S10_132010081	S1_294658748	0.00635	0.000201	0.00465
S10_132010081	S1_7458270	0.0482	0.000759	0.0401
S10_132010081	S2_13873595	0.00241	0.000802	0.00201
S10_132010081	S2_178262734	0.00911	0.000677	0.00534
S10_132010081	S2_79769999	0.00071	9.58e-05	0.000532
S10_132010081	S3_169216129	0.00789	0.0005	0.00476
S10_132010081	S3_230179656	0.000672	8.22e-06	0.000271
S10_132010081	S4_177373931	0.00329	0.000101	0.00297
S10_132010081	S7_172163467	0.00654	0.000259	0.00591
S10_132010081	S8_14604379	0.00186	0.000287	0.00176
S10_132010081	S8_14837806	0.000818	0.000346	0.00108
S10_132010081	S8_165142649	0.0179	0.000684	0.0158
S10_132010081	S8_170669741	0.00089	0.000351	0.000924
S10_132010081	S9_153188212	0.00269	0.000554	0.00476
S10_132010081	S9_16181300	0.000594	0.00073	0.000634
S10_132010081	S9_5074933	0.022	0.000537	0.0143
S10_132091328	S1_12169701	0.0113	0.000718	0.0103
S10_132091328	S2_211521270	1.56e-05	4.27e-07	1.21e-05
S10_132091328	S2_9503992	0.00177	0.000585	0.00163
S10_132091328	S5_189884303	0.00564	0.000208	0.00447
S10_132091328	S6_114937259	0.0121	0.000185	0.0108
S10_132091328	S7_9366042	0.000159	3.78e-05	0.00018
S10_132091328	S9_153519859	0.00078	0.000159	0.00081
S10_132091328	S9_59453957	0.000434	0.000158	0.000429
S10_132393243	S5_204493402	0.00579	0.000542	0.00445
S10_132393243	S9_23010455	0.00656	0.000551	0.00417
S10_132424210	S10_145198346	0.0192	0.000417	0.0103
S10_132424210	S1_205574453	0.00647	0.000718	0.00677
S10_132424210	S2_9278051	0.00886	5.42e-05	0.00603
S10_132424210	S3_184269923	0.000566	0.000141	0.000568
S10_132424210	S4_16213189	0.000295	2.64e-05	0.000242
S10_132424210	S4_171731698	0.00376	0.000613	0.00333
S10_132424210	S4_177373931	0.00915	0.000351	0.00721
S10_132424210	S5_204865984	0.00258	0.000297	0.00205
S10_132424210	S6_151126988	0.0012	0.000634	0.00189
S10_132424210	S6_160328767	0.000873	0.000549	0.00068
S10_132424210	S9_8416672	0.00584	0.000225	0.00438
S10_132540789	S4_30681	0.000628	0.000462	0.000671
S10_132540789	S5_17342934	0.00573	0.000916	0.00537
S10_132540789	S5_4154084	0.0372	0.000565	0.0264
S10_132540789	S9_144531671	0.00103	6.34e-05	0.000727
S10_132954057	S10_142922020	0.0207	0.000467	0.0214
S10_132954057	S1_265169401	0.000693	7.51e-06	0.000597
S10_132954057	S2_178262734	0.00142	0.000512	0.00187
S10_132954057	S5_216440094	0.00131	0.000673	0.00446
S10_132954057	S7_172769301	0.00242	0.000392	0.00181
S10_132954057	S9_147965995	0.00561	0.0005	0.00648
S10_132954057	S9_149647425	0.00124	0.000229	0.000842
S10_134459308	S1_291258884	0.0471	0.000936	0.0307
S10_134459308	S2_236485850	0.00251	4.54e-05	0.00224
S10_134459308	S5_205147938	0.015	0.000703	0.0115
S10_134459308	S7_133374178	0.0153	4.28e-05	0.000324
S10_1348231	S10_137501104	0.00218	0.000409	0.00161
S10_1348231	S10_79136392	0.00232	0.000985	0.00357
S10_1348231	S10_88396859	0.000411	1.76e-05	0.000384
S10_1348231	S1_184614464	0.00407	7.43e-05	0.00213
S10_1348231	S1_273781985	0.00884	0.000477	0.00652
S10_1348231	S2_144983633	0.0129	0.000509	0.0118
S10_1348231	S2_14545408	0.00181	0.000213	0.00175
S10_1348231	S2_175088917	0.00789	0.000262	0.00321
S10_1348231	S2_188901776	0.000923	0.000427	0.000909
S10_1348231	S2_27592229	0.00704	0.000963	0.00511
S10_1348231	S2_6338854	0.000791	0.000396	0.000932
S10_1348231	S2_9414239	0.000234	6.38e-05	7.75e-05
S10_1348231	S3_145787107	6.87e-06	1.47e-06	1.41e-05
S10_1348231	S3_169216129	0.000952	0.00876	0.00122
S10_1348231	S3_1724790	0.0232	0.000362	0.00653
S10_1348231	S3_195750539	0.00248	0.000669	0.00381
S10_1348231	S3_230158388	0.00073	5.23e-05	0.000636
S10_1348231	S3_47959622	0.000471	7.48e-05	0.000304
S10_1348231	S3_86873688	0.000113	9.83e-06	0.000125
S10_1348231	S4_17978482	0.00139	4.93e-05	0.000848
S10_1348231	S4_201122384	0.000955	0.00483	0.00151
S10_1348231	S5_174675337	0.000213	9.79e-05	0.000261
S10_1348231	S5_205235001	0.0016	0.000506	0.00233
S10_1348231	S5_211666978	0.000695	0.00275	0.000693
S10_1348231	S5_7457163	0.00269	0.000483	0.00388
S10_1348231	S6_153267963	0.000246	8.88e-05	0.000305
S10_1348231	S6_162568664	0.000198	1.14e-05	0.000199
S10_1348231	S6_92485700	0.000718	0.000853	0.000772
S10_1348231	S7_170244218	4.26e-05	0.000125	6.51e-05
S10_1348231	S7_173431320	0.00223	0.000119	0.00136
S10_1348231	S7_174512526	0.00232	5.1e-05	0.00132
S10_1348231	S7_8049913	0.000159	1.52e-05	0.000166
S10_1348231	S8_14390220	0.000584	0.000594	0.000702
S10_1348231	S8_19805737	0.00289	0.000516	0.00112
S10_1348231	S9_141476072	0.000125	2.37e-05	9.31e-05
S10_1348231	S9_153509083	0.000132	4.75e-05	0.000157
S10_1348231	S9_153519859	0.00461	0.000974	0.00565
S10_1348911	S10_137286252	0.00741	0.000894	0.00712
S10_1348911	S1_264953740	0.000246	1.44e-05	0.000212
S10_1348911	S1_267783859	0.00582	0.000957	0.00476
S10_1348911	S4_171788276	7.38e-05	4.03e-05	5.39e-05
S10_1348911	S7_174865970	0.00578	0.000204	0.00404
S10_1348911	S9_18914601	0.00167	0.000284	0.00118
S10_134969273	S10_79136392	0.000365	1.94e-05	0.000301
S10_134969273	S1_12516945	0.000553	4.5e-05	0.000551
S10_134969273	S1_272839586	0.0113	0.000413	0.0103
S10_134969273	S2_215016025	0.0129	0.000542	0.00686
S10_134969273	S3_177442272	0.00402	0.000481	0.00324
S10_134969273	S3_30125641	0.000277	0.0018	0.000399
S10_134969273	S8_1640711	0.0125	0.000446	0.00871
S10_134969273	S8_164626896	0.0113	0.00071	0.0114
S10_135683541	S6_156748611	0.00105	9.63e-05	0.00109
S10_135683541	S7_173431320	0.00259	0.000448	0.00316
S10_135683541	S8_10868232	0.00264	0.000521	0.00226
S10_136012177	S10_143058883	0.00014	4.85e-05	0.000349
S10_136012177	S10_4527763	0.000838	0.000271	0.00169
S10_136012177	S1_12169701	0.00173	9.65e-05	0.00136
S10_136012177	S1_281908482	0.000872	0.000814	0.000879
S10_136012177	S1_288490496	0.00324	0.00051	0.00371
S10_136012177	S1_29196662	0.00315	5.8e-05	0.003
S10_136012177	S2_143485578	0.00221	0.00043	0.00278
S10_136012177	S2_22756457	0.000918	8.43e-05	0.00106
S10_136012177	S2_229287384	0.00306	0.000328	0.00558
S10_136012177	S2_230941327	0.00306	6.72e-05	0.00129
S10_136012177	S3_157085834	0.000838	0.00118	0.00105
S10_136012177	S3_184269923	0.00206	3.03e-06	0.00117
S10_136012177	S3_211020781	0.0106	0.000194	0.00731
S10_136012177	S3_25879201	3.56e-05	5.81e-07	1.46e-05
S10_136012177	S4_176502364	0.000775	0.000219	0.00105
S10_136012177	S4_177150234	0.00288	0.000201	0.00387
S10_136012177	S4_239154878	0.000583	4.7e-05	0.000556
S10_136012177	S5_172920541	0.000813	0.000105	0.000582
S10_136012177	S5_175588693	0.00258	2.42e-05	0.00246
S10_136012177	S5_200688862	0.0128	0.000447	0.0062
S10_136012177	S5_2766933	0.00685	8.55e-05	0.00464
S10_136012177	S5_6529026	0.000682	0.00918	0.00174
S10_136012177	S6_86476196	0.00427	0.000365	0.0028
S10_136012177	S7_172163467	0.0568	0.000486	0.0172
S10_136012177	S8_1640711	0.000123	0.000145	0.000226
S10_136012177	S8_72977857	0.0144	0.000843	0.0189
S10_136012177	S9_102323942	0.0243	0.000484	0.0561
S10_136012177	S9_136787013	0.00392	7.04e-06	0.00217
S10_136012177	S9_142051997	0.00984	0.000212	0.00853
S10_136012177	S9_149552629	0.000546	7.47e-05	0.000429
S10_136012177	S9_5656939	0.00564	0.000276	0.00607
S10_136086161	S1_249319740	0.00237	0.000742	0.00258
S10_136086161	S1_25414671	0.00285	0.000229	0.00268
S10_136086161	S4_178494167	0.00259	0.000257	0.00239
S10_136086161	S4_188300023	0.000608	0.00716	0.00065
S10_136086161	S4_236414088	0.000636	0.000118	0.00128
S10_136086161	S5_190051286	7.24e-05	5.14e-06	5.65e-05
S10_136086161	S5_206186220	0.000327	0.000264	0.000493
S10_136086161	S9_153188212	9.14e-05	0.000415	0.000361
S10_136963180	S1_249319740	0.00165	0.000169	0.00144
S10_136963180	S1_292078249	0.0182	0.000606	0.0154
S10_136963180	S2_11829987	0.00432	0.000144	0.00313
S10_136963180	S2_143259003	0.00709	0.00018	0.00524
S10_136963180	S2_224343513	0.00714	0.000324	0.00581
S10_136963180	S3_30125641	0.000109	2.84e-06	7.95e-05
S10_136963180	S7_161287771	0.0055	0.000719	0.00497
S10_136963180	S7_167622106	0.000439	9.81e-05	0.000494
S10_137286252	S1_184614464	0.00946	0.000491	0.00826
S10_137286252	S7_133565605	0.00218	0.000709	0.00245
S10_137501104	S10_148229061	0.000614	0.00043	0.00124
S10_137501104	S1_9956412	0.000221	0.000305	0.000238
S10_137501104	S2_231338910	0.00361	0.000265	0.00305
S10_137501104	S4_5406529	0.000586	0.000824	0.000743
S10_137501104	S5_210676383	0.00689	0.000708	0.00599
S10_137501104	S7_141586596	0.003	0.000849	0.00318
S10_137501104	S7_161951071	0.000576	0.000645	0.00047
S10_137501104	S8_139594221	0.00411	0.000369	0.00343
S10_137501104	S9_137786926	0.00686	0.000264	0.00601
S10_137501104	S9_147629148	3.21e-05	6.68e-05	5.85e-05
S10_138075451	S2_179393601	0.00162	0.000898	0.00123
S10_138075451	S2_196295156	0.000754	0.000703	0.00101
S10_138075451	S2_222731285	0.00598	0.000947	0.00574
S10_138075451	S4_175381566	0.00643	0.000777	0.00451
S10_138075451	S7_167622106	0.000937	0.000474	0.000863
S10_138075451	S8_127623226	0.00506	0.000394	0.00363
S10_138075451	S8_76529972	0.00142	0.000907	0.00114
S10_138075451	S9_141472971	0.00896	0.000645	0.00552
S10_139034755	S1_56978233	0.0353	0.000734	0.0269
S10_139034755	S4_188300023	0.00489	0.000407	0.00169
S10_139034755	S4_2409520	0.00185	0.00017	0.00151
S10_139034755	S5_214111261	0.000628	0.000629	0.000668
S10_139034755	S7_163575325	0.025	0.000531	0.0145
S10_139034755	S9_4224035	0.00459	0.00047	0.00163
S10_139076223	S10_143058883	0.000577	0.000179	0.000362
S10_139076223	S10_1928735	0.000503	0.0206	0.0175
S10_139076223	S1_19356020	0.000542	0.000145	0.000532
S10_139076223	S1_291889365	0.0196	0.00034	0.0135
S10_139076223	S2_207379888	0.00465	0.000982	0.0113
S10_139076223	S2_6338854	0.000523	0.00216	0.00234
S10_139076223	S5_190476896	0.00194	0.000741	0.00273
S10_139076223	S5_205285315	0.00854	0.000519	0.00625
S10_139076223	S7_161951071	0.00165	9.8e-05	0.00103
S10_139076223	S8_175069747	0.014	0.000678	0.00907
S10_139978599	S10_143058883	0.000266	0.000163	0.000353
S10_139978599	S10_144983389	0.00197	0.000472	0.00311
S10_139978599	S10_146335836	0.000242	3.43e-05	0.000131
S10_139978599	S1_277383277	0.00203	0.000304	0.00178
S10_139978599	S1_293942416	0.000457	4.59e-05	0.000588
S10_139978599	S1_7458270	0.00786	0.000992	0.00791
S10_139978599	S2_45767366	0.0025	0.000404	0.00289
S10_139978599	S3_19165588	0.0136	0.000863	0.00764
S10_139978599	S3_224499810	0.00288	0.00038	0.00377
S10_139978599	S4_238933491	0.000708	0.000242	0.000636
S10_139978599	S4_239413509	0.00578	0.000288	0.00484
S10_139978599	S4_3048559	0.00113	0.000543	0.00143
S10_139978599	S5_208926339	0.0357	0.000843	0.0134
S10_139978599	S5_212748793	0.00357	0.000333	0.00355
S10_139978599	S5_4320911	0.00757	0.000216	0.00807
S10_139978599	S6_165316207	0.000472	0.000171	0.00106
S10_139978599	S7_135815687	0.00435	5.04e-05	0.0022
S10_139978599	S7_157473915	7.52e-05	5.5e-06	8.56e-05
S10_139978599	S7_159410691	0.00201	0.000512	0.00341
S10_139978599	S7_170129431	0.0015	0.00048	0.00133
S10_139978599	S8_108568614	0.0109	0.000825	0.00918
S10_139978599	S8_137219220	0.0381	0.000269	0.0269
S10_140194397	S10_146687463	0.00017	1.06e-05	0.000116
S10_140194397	S1_202550281	0.00567	0.000662	0.00521
S10_140194397	S1_280578531	0.00475	0.000635	0.00391
S10_140194397	S1_79240850	0.00465	0.000656	0.00388
S10_140194397	S2_11949286	0.0102	0.00083	0.00933
S10_140194397	S2_2493148	0.00113	0.000515	0.000995
S10_140194397	S3_215536298	0.00405	0.000551	0.00368
S10_140194397	S3_216794628	0.00886	0.000772	0.00549
S10_140194397	S5_206186220	0.00143	0.000714	0.0015
S10_140194397	S8_162561752	0.00125	0.000323	0.000901
S10_140194397	S9_4224035	0.000475	0.00138	0.000707
S10_140268650	S1_173238086	0.0238	0.000744	0.0201
S10_140268650	S1_184614464	0.000885	0.00162	0.00183
S10_140268650	S1_293930177	0.00221	7.92e-05	0.0015
S10_140268650	S1_76339723	0.0118	0.00074	0.00638
S10_140268650	S2_184537790	0.00625	0.000574	0.0084
S10_140268650	S2_211521270	0.0077	0.000113	0.00724
S10_140268650	S3_226806793	0.0266	0.000986	0.0173
S10_140268650	S5_212682910	0.0105	0.000987	0.0129
S10_140268650	S6_160334467	0.00144	0.000728	0.00949
S10_140268650	S6_86476196	0.00213	0.000847	0.00488
S10_140268650	S7_173810031	0.00671	0.000413	0.00713
S10_140268650	S7_174865970	0.0021	0.000275	0.00176
S10_140268650	S7_27311620	0.00402	0.000146	0.00481
S10_140268650	S9_5994538	0.0363	0.000141	0.0221
S10_14084855	S10_146335836	0.000535	0.000139	0.000332
S10_14084855	S2_34221773	0.00162	0.000202	0.00119
S10_14084855	S3_2116890	0.000922	0.00218	0.00111
S10_14084855	S4_155767539	0.00194	0.000892	0.00187
S10_14084855	S6_86476196	0.00298	0.000193	0.0019
S10_14084855	S7_159939187	0.00356	0.000229	0.00253
S10_140975391	S2_52284399	0.000744	0.000645	0.000456
S10_140975391	S4_237269376	0.0113	0.0002	0.00589
S10_140975391	S4_237777048	0.000519	7.68e-06	0.00034
S10_140975391	S5_190244572	0.00055	1.68e-05	0.000372
S10_140975391	S5_193936550	0.0274	0.00092	0.0187
S10_140975391	S6_92485700	0.000376	0.00044	0.000717
S10_140975391	S7_5336940	0.000686	7.37e-06	0.000542
S10_140985791	S1_268430905	0.0112	0.00034	0.00964
S10_140985791	S2_185831713	0.00856	0.000959	0.00891
S10_140985791	S3_220849518	0.00225	0.000135	0.00103
S10_140985791	S3_225170174	0.0214	0.000972	0.0152
S10_140985791	S3_30125641	0.00172	0.000189	0.00084
S10_140985791	S4_238435996	0.00464	0.000674	0.0056
S10_140985791	S9_16181300	0.0021	7.21e-05	0.00199
S10_141276166	S10_1928735	0.00862	1.83e-05	0.0028
S10_141276166	S2_7411524	0.000683	0.000127	0.000767
S10_141276166	S4_238435996	0.000373	8.93e-06	0.000199
S10_141276166	S5_164771433	0.0164	0.000852	0.0109
S10_141276166	S6_167436380	0.00284	0.000704	0.00338
S10_141276166	S9_9357534	0.00979	0.000429	0.00764
S10_142358869	S2_233400749	0.00219	0.0002	0.000839
S10_142358869	S5_42229443	0.00173	1.61e-05	0.000804
S10_142358869	S7_13846390	0.0101	0.00063	0.00514
S10_142358869	S7_166667048	0.00107	0.000258	0.001
S10_142358869	S8_10760930	0.00188	0.000235	0.00153
S10_142505992	S10_73622536	0.0253	0.000318	0.00238
S10_142505992	S3_86873688	0.00954	0.00048	0.00978
S10_142922020	S1_115219651	0.0077	0.000549	0.00437
S10_142922020	S1_296710300	0.00135	0.000454	0.00171
S10_142922020	S2_205942114	0.0116	0.000894	0.00876
S10_142922020	S2_206902934	0.0116	0.000122	0.00788
S10_142922020	S2_225826086	0.00216	0.000148	0.00179
S10_142922020	S2_4343304	0.0157	9.54e-05	0.0123
S10_142922020	S4_239001389	0.00822	0.000734	0.00622
S10_142922020	S4_65745467	0.00106	2.35e-05	0.000465
S10_142922020	S5_13052861	0.00108	0.000406	0.00125
S10_142922020	S5_157793663	0.00164	0.00033	0.000963
S10_142922020	S5_212619269	0.0226	0.000593	0.0239
S10_142922020	S6_93497207	0.00623	0.000231	0.00338
S10_142922020	S7_156788305	0.00709	3.73e-05	0.00336
S10_142922020	S7_2888491	0.00265	0.000668	0.00243
S10_143058883	S1_206308168	0.000546	0.00228	0.000378
S10_143058883	S1_290201011	0.0019	0.000194	0.00174
S10_143058883	S2_13141127	0.000527	5.17e-05	0.000352
S10_143058883	S2_170297810	0.00131	0.000244	0.00121
S10_143058883	S2_19988503	0.0063	0.00054	0.00538
S10_143058883	S2_234264945	0.00234	0.000149	0.00154
S10_143058883	S2_3806475	0.00789	0.0003	0.00482
S10_143058883	S4_157631782	0.00552	0.000425	0.00394
S10_143058883	S5_177668298	0.000202	6.56e-06	0.000106
S10_143058883	S7_133374178	0.00072	0.000633	0.00481
S10_143058883	S7_158160938	0.0281	0.000601	0.0196
S10_143058883	S8_108568614	0.00208	0.0003	0.00145
S10_143058883	S8_168482318	0.00317	7.5e-05	0.00236
S10_143058883	S8_168828093	0.00133	0.000265	0.0013
S10_143058883	S8_170224601	0.000201	0.000438	0.000801
S10_143442158	S10_4747589	0.00339	0.000428	0.00418
S10_143442158	S2_188901776	0.0163	0.000755	0.00729
S10_143442158	S2_232486658	0.013	0.000431	0.00822
S10_143442158	S3_157570069	0.00195	2.07e-05	0.000588
S10_143739972	S2_21791455	0.0071	0.000545	0.00666
S10_143739972	S4_180623850	0.00641	0.000374	0.00398
S10_143739972	S5_111998304	0.00653	0.00015	0.00492
S10_143739972	S5_4320911	0.00338	0.000171	0.0028
S10_143739972	S6_165316207	0.0112	0.000282	0.00221
S10_143739972	S6_93497207	0.00252	0.000704	0.00268
S10_143739972	S7_158160938	0.000641	5.96e-05	0.000876
S10_143739972	S7_9366042	0.000933	0.00106	0.00129
S10_143739972	S8_170224601	0.000149	3.92e-05	0.000173
S10_144453438	S1_9956412	0.00471	0.000532	0.00398
S10_144453438	S3_208837596	0.000227	0.00173	0.000471
S10_144453438	S3_211020781	0.000697	0.000107	0.000771
S10_144453438	S5_5792479	0.041	0.000591	0.0379
S10_144453438	S6_161835408	0.000794	0.000275	0.000562
S10_144453438	S7_159939187	0.000392	3.13e-05	0.000289
S10_144915325	S2_12798571	0.00439	0.000541	0.00299
S10_144915325	S2_215016025	0.000901	4.6e-06	0.000468
S10_144915325	S2_217406209	0.00616	0.000207	0.00313
S10_144915325	S3_220849518	0.00241	0.000399	0.00242
S10_144915325	S3_226417605	0.00183	0.000167	0.00173
S10_144915325	S3_9070568	0.0192	0.00058	0.0106
S10_144915325	S4_200843907	0.00245	0.000569	0.00205
S10_144915325	S4_224911596	0.00427	0.000863	0.00517
S10_144915325	S8_171543944	0.00423	0.000536	0.00413
S10_144915325	S9_152205264	0.00524	0.000689	0.00401
S10_144919716	S1_12516945	0.0156	0.000986	0.0113
S10_144919716	S1_295482672	0.00264	0.000384	0.00175
S10_144919716	S2_6338854	0.00147	0.000147	0.0012
S10_144919716	S3_227394611	0.00211	6.58e-05	0.00226
S10_144919716	S3_30125641	0.000275	2.02e-05	0.000439
S10_144919716	S4_234572467	0.000722	0.000428	0.000493
S10_144919716	S5_177668298	0.00772	0.000731	0.00586
S10_144919716	S5_4154084	0.00375	0.000849	0.00332
S10_144983389	S10_148832565	0.00428	0.000535	0.00371
S10_144983389	S1_32092189	0.0313	0.000966	0.02
S10_144983389	S1_48505528	0.0016	4.05e-05	0.000522
S10_144983389	S1_8538065	0.0131	0.000619	0.0108
S10_144983389	S2_170297810	0.0123	0.00042	0.0137
S10_144983389	S2_180526645	0.00552	2.27e-05	0.0022
S10_144983389	S2_233400749	0.00231	0.000412	0.00369
S10_144983389	S2_60658831	0.00104	0.00051	0.000953
S10_144983389	S3_220849518	0.000791	0.000518	0.00135
S10_144983389	S3_227394611	0.0114	0.000637	0.0116
S10_144983389	S4_20100579	0.00744	0.000451	0.00596
S10_144983389	S4_7010265	0.00113	0.000165	0.000976
S10_144983389	S5_205235001	0.00496	0.000621	0.00379
S10_144983389	S6_153101499	0.0259	0.000996	0.0174
S10_144983389	S6_86476196	0.000185	1.53e-05	9.67e-05
S10_144983389	S8_164741115	0.00252	5.48e-05	0.00208
S10_144983389	S8_175069747	0.000669	5.54e-05	0.000588
S10_144983389	S9_137873250	0.000739	0.0023	0.0011
S10_145198346	S10_146687463	0.00069	0.00146	0.000798
S10_145198346	S10_73622536	0.0037	0.000392	0.00305
S10_145198346	S1_269304434	0.0144	0.000847	0.0125
S10_145198346	S2_189579989	0.00194	0.000447	0.00209
S10_145198346	S2_2493148	4.48e-05	0.000507	8.24e-05
S10_145198346	S3_169216129	0.000599	0.000167	0.000559
S10_145198346	S4_12083578	0.0269	0.000674	0.0347
S10_145198346	S4_234572467	0.00191	5.36e-05	0.0018
S10_145198346	S4_237953848	0.0026	0.000116	0.00197
S10_145275218	S1_296710300	0.0116	0.000733	0.00845
S10_145275218	S2_188901776	0.0073	0.000125	0.00443
S10_145275218	S2_19988503	0.000264	1.21e-05	0.000198
S10_145275218	S2_235888860	0.000936	0.00029	0.000755
S10_145275218	S3_145787107	0.000108	1.66e-05	0.000126
S10_145275218	S3_223537211	0.0264	0.000807	0.0215
S10_145275218	S4_227274185	0.00221	0.000696	0.00126
S10_145275218	S5_71851495	0.00681	0.000398	0.00705
S10_145275218	S6_151485800	0.00135	0.000666	0.000914
S10_145275218	S9_16181300	0.00104	0.000171	0.000419
S10_146335836	S10_148410175	0.00601	0.000927	0.00412
S10_146335836	S2_4889615	0.00204	0.000283	0.00202
S10_146335836	S2_79769999	0.0049	0.000243	0.00352
S10_146335836	S4_180667967	0.0137	0.000209	0.00691
S10_146335836	S4_181890725	0.00257	0.000174	0.000974
S10_146335836	S4_237953848	0.000276	3.9e-06	0.000167
S10_146335836	S5_214093107	0.00737	0.000302	0.00406
S10_146335836	S6_151550553	0.00064	0.000447	0.000545
S10_146335836	S6_153101499	0.00996	0.000111	0.00863
S10_146335836	S7_159761371	0.0145	0.000876	0.0103
S10_146335836	S7_173810031	0.00231	0.000293	0.00225
S10_146335836	S9_153223374	8.74e-06	2.22e-07	4.42e-06
S10_146472783	S10_1928735	0.000833	0.00503	0.00516
S10_146472783	S1_217210507	0.0107	0.000454	0.00799
S10_146472783	S1_45340165	0.00355	0.000104	0.00129
S10_146472783	S4_21914770	0.00361	0.000431	0.00659
S10_146472783	S5_5378919	0.00577	0.000771	0.00537
S10_146472783	S9_4224035	0.0162	0.000812	0.0183
S10_146687463	S10_14908730	0.00148	0.000455	0.00169
S10_146687463	S2_10144846	0.00609	0.000425	0.00441
S10_146687463	S5_211547778	0.00173	0.000274	0.00132
S10_146687463	S6_88739645	0.00504	0.000237	0.00394
S10_146687463	S8_173509618	0.000807	9.53e-05	0.00147
S10_146687463	S8_173713608	0.00191	0.000815	0.00196
S10_146969797	S2_18210382	0.000163	0.000566	0.000192
S10_146969797	S2_235888860	0.00805	0.000789	0.00631
S10_146969797	S3_225343099	0.000364	0.000454	0.000432
S10_146969797	S8_8122936	0.000427	1.73e-05	0.00033
S10_147141273	S10_148410175	0.0522	0.00089	0.0292
S10_147141273	S2_12352432	0.01	0.000404	0.00585
S10_147141273	S3_219400298	0.014	0.000985	0.011
S10_147141273	S8_170224601	0.0022	0.000145	0.00115
S10_147392450	S1_28072015	0.00656	0.000375	0.00418
S10_147392450	S2_217406209	0.00601	0.000169	0.00606
S10_147392450	S3_226807868	0.000948	0.000191	0.000691
S10_147392450	S3_9808727	0.0324	0.00094	0.0334
S10_147392450	S6_111367431	0.00127	1.24e-05	0.00101
S10_147392450	S9_137873250	0.00106	0.000167	0.00118
S10_147449161	S1_264164784	0.000646	5.34e-05	0.000382
S10_147449161	S1_287803582	0.0631	0.000804	0.0311
S10_147449161	S3_30125641	0.00045	2.29e-05	0.00027
S10_147449161	S3_3214313	0.00103	0.000438	0.000786
S10_147449161	S5_11599093	0.000889	0.000104	0.000698
S10_147449161	S5_5378919	0.00142	5.43e-05	0.00113
S10_147459915	S3_9035491	0.00939	0.000633	0.00672
S10_147459915	S5_210867065	0.00671	0.000415	0.00431
S10_147459915	S6_155650795	0.0034	0.00022	0.00341
S10_147459915	S8_119646326	0.0117	0.000577	0.00794
S10_147459915	S8_171744826	0.0302	0.000924	0.0213
S10_147459915	S8_29147147	0.0411	0.000697	0.0297
S10_147459915	S9_17632988	0.000186	0.000173	0.000197
S10_147459915	S9_86306438	0.00554	0.000559	0.00503
S10_147849342	S2_44719287	0.024	0.000588	0.0131
S10_147849342	S9_18914601	0.00759	0.000852	0.00691
S10_147900355	S3_212764451	0.0126	0.000422	0.0113
S10_147900355	S5_12363960	0.00197	0.000312	0.00143
S10_147900355	S7_156495795	0.00283	0.000579	0.00233
S10_147900355	S7_7277849	0.0119	0.000775	0.0113
S10_147900355	S8_100763869	0.0382	0.000726	0.0346
S10_147903164	S1_290201011	0.00268	0.000187	0.00192
S10_147903164	S2_5101600	0.00649	0.000953	0.00556
S10_147903164	S3_216987551	0.0022	0.000143	0.00155
S10_147903164	S8_10392707	0.0064	0.000607	0.00657
S10_147955614	S1_287981955	0.00196	0.000105	0.00153
S10_147955614	S3_220028146	0.0017	0.000397	0.00147
S10_147955614	S4_237269376	0.00355	0.000968	0.0031
S10_147955614	S5_214093107	0.00453	0.000444	0.00333
S10_147955614	S7_168404865	0.00803	0.00094	0.00795
S10_147955614	S9_130919657	0.0276	0.000967	0.0211
S10_147998269	S2_186639833	0.00438	0.000754	0.00407
S10_147998269	S2_236413008	0.00652	0.00036	0.00639
S10_147998269	S3_122496238	0.00126	0.00055	0.00112
S10_147998269	S5_27099261	0.00773	0.00032	0.00522
S10_147998269	S6_154165681	0.00377	0.00036	0.00194
S10_147998269	S6_162568664	0.00121	0.000155	0.000961
S10_147998269	S8_170224601	0.000448	0.00172	0.00119
S10_147998269	S8_172219494	0.000564	0.000126	0.000372
S10_147998269	S8_6592186	0.00037	0.00155	0.00102
S10_147998269	S9_149545856	0.00161	6.07e-05	0.000926
S10_147998269	S9_149552629	0.000115	0.000103	8.38e-05
S10_147998269	S9_153413532	0.000922	6.66e-05	0.000627
S10_147998269	S9_153509083	0.00423	0.000881	0.00359
S10_148229061	S1_11242783	0.0122	0.000854	0.01
S10_148229061	S1_23609916	0.00077	0.0116	0.000838
S10_148229061	S2_180526645	0.00552	0.000135	0.00394
S10_148229061	S2_188901776	0.000355	0.000614	0.000434
S10_148229061	S2_217406209	0.000869	0.00047	0.00121
S10_148229061	S3_19945628	0.0154	0.000807	0.0111
S10_148229061	S7_168388048	0.00597	0.000175	0.00455
S10_148229061	S8_127623226	0.0234	0.000872	0.0182
S10_148229061	S8_149982616	0.00143	0.000544	0.00127
S10_148229061	S8_162185699	0.00457	0.000594	0.00466
S10_148229061	S8_170224601	0.00166	0.000163	0.0047
S10_148229061	S9_153188212	0.00475	0.000192	0.00203
S10_148229061	S9_6007138	0.0128	0.000447	0.013
S10_148297650	S1_2727739	0.00314	0.000249	0.00259
S10_148297650	S2_232528329	0.00158	0.000382	0.00125
S10_148297650	S3_3559640	0.00158	8.92e-05	0.00133
S10_148297650	S4_7010265	0.0036	0.0002	0.00357
S10_148297650	S6_155392451	0.000333	4.36e-05	0.000209
S10_148410175	S2_3114419	0.000118	0.000103	0.000134
S10_148410175	S3_23684537	0.00249	0.000504	0.00128
S10_148410175	S5_3538509	0.00106	4.85e-05	0.000931
S10_148410175	S8_14604379	0.00223	4.33e-05	0.00167
S10_148582695	S1_274991245	0.00118	0.000447	0.00104
S10_148582695	S1_39895810	0.00207	0.000171	0.00144
S10_148582695	S2_208610387	0.00153	0.000238	0.00108
S10_148582695	S2_6338854	0.0134	0.000153	0.0024
S10_148582695	S5_211763449	0.0223	0.000614	0.0179
S10_148582695	S5_216440094	0.00493	0.000958	0.00714
S10_148582695	S6_111367431	0.0138	0.000888	0.00953
S10_148582695	S6_164893186	0.0099	0.000234	0.00619
S10_148582695	S7_170621064	3.03e-06	1.14e-07	2.38e-06
S10_148582695	S7_9340960	0.00567	0.000723	0.00632
S10_148582695	S9_154247950	0.0019	0.000498	0.00215
S10_148828489	S1_264953740	0.00205	0.000187	0.00211
S10_148828489	S3_169216129	0.00565	0.000918	0.0046
S10_148828489	S5_2363546	0.00105	0.000493	0.00104
S10_148828489	S7_169937062	0.0155	0.000741	0.0133
S10_148828489	S8_12990030	0.000911	0.000186	0.00148
S10_148828489	S8_1831170	0.0363	0.000297	0.0272
S10_148832565	S2_18210382	0.000282	0.00018	0.00034
S10_148832565	S2_234433774	0.00402	0.000993	0.00377
S10_148832565	S2_236290844	0.00702	0.00093	0.00456
S10_148832565	S3_20743721	0.000332	0.000161	0.000214
S10_148832565	S5_213584979	0.00498	0.000689	0.00678
S10_148832565	S6_137309233	0.00515	0.000504	0.0057
S10_148832565	S6_140711920	0.023	0.00023	0.0169
S10_148832565	S7_124953809	3.97e-06	1.64e-06	5.49e-06
S10_148934805	S1_293942416	0.0049	0.000136	0.00606
S10_148934805	S1_8656801	0.0223	0.000879	0.00751
S10_148934805	S2_206538807	0.00251	0.00059	0.00126
S10_148934805	S2_236720622	0.0082	9.75e-05	0.00227
S10_148934805	S3_157570069	0.000337	0.000152	0.000863
S10_148934805	S3_224499810	0.0026	0.000117	0.00208
S10_148934805	S4_223519868	0.00466	0.000811	0.00422
S10_148934805	S4_228626417	0.000444	3.78e-05	0.000244
S10_148934805	S5_210867065	0.0018	9.55e-05	0.000342
S10_148934805	S7_132629901	0.00237	0.000831	0.00142
S10_148934805	S7_135815687	0.00456	0.000803	0.00285
S10_148934805	S7_143002114	0.013	0.000882	0.00992
S10_148934805	S7_34181796	0.00292	0.000699	0.00282
S10_148934805	S8_12990030	0.00697	0.000277	0.00446
S10_148934805	S8_137219220	0.00066	0.00175	0.0018
S10_148934805	S9_7701829	0.00633	0.000812	0.00298
S10_14908730	S1_206789090	0.00104	4.1e-05	0.000486
S10_14908730	S1_253905760	0.00473	0.000694	0.00229
S10_14908730	S2_194907609	0.000261	4.36e-06	0.000335
S10_14908730	S2_236290844	0.0132	0.000721	0.0098
S10_14908730	S2_26287935	0.00901	0.000319	0.00621
S10_14908730	S3_145787107	0.0303	0.000418	0.0212
S10_14908730	S3_6941062	0.000456	4.93e-05	0.000141
S10_14908730	S4_156513213	0.00183	0.000412	0.00122
S10_14908730	S5_1026096	0.0141	0.000953	0.00763
S10_14908730	S7_133565605	0.01	0.000836	0.00953
S10_14908730	S7_156495795	0.000855	9.94e-06	0.000769
S10_14908730	S7_174220083	3.54e-05	2.64e-05	7.67e-05
S10_14908730	S7_34181796	0.000834	0.000876	0.000822
S10_14908730	S9_18914601	0.0102	0.00036	0.00566
S10_149093129	S1_265169401	0.00285	0.000166	0.002
S10_149093129	S1_288490496	0.000614	0.000148	0.000568
S10_149093129	S2_9278051	0.000803	0.000269	0.000798
S10_149093129	S4_217595025	0.0058	0.000731	0.00643
S10_149093129	S4_237268481	0.000847	0.000712	0.00122
S10_149093129	S6_158471331	0.00479	0.000988	0.00418
S10_149093129	S6_92485700	0.0072	0.000952	0.00214
S10_149093129	S6_9497661	0.0221	0.000402	0.0212
S10_149093129	S7_174754087	0.000472	6.88e-05	0.000547
S10_149093129	S8_119646326	0.000105	3.04e-05	0.000158
S10_149093129	S8_173509618	0.000272	3.22e-06	0.000116
S10_149093129	S9_3743828	0.0021	0.000206	0.00218
S10_1714578	S10_1883817	0.00451	0.000461	0.0032
S10_1714578	S1_292340955	0.000982	0.000426	0.000892
S10_1714578	S2_234433774	7.68e-05	1.28e-06	6.98e-05
S10_1714578	S3_9035491	0.00238	0.000182	0.00155
S10_1714578	S5_175588693	0.000229	1.22e-05	0.000218
S10_1714578	S6_111022510	0.00524	0.00064	0.00345
S10_1714578	S6_133799288	0.00467	0.000748	0.00362
S10_1714578	S6_152509426	0.000246	0.00012	0.000224
S10_1714578	S7_173431320	0.0033	0.000245	0.00309
S10_1714578	S9_17632988	0.000521	0.00248	0.000509
S10_1716185	S10_79136392	0.0116	0.000958	0.0112
S10_1716185	S2_15997014	0.00854	0.000932	0.00654
S10_1716185	S5_186725422	0.00547	0.000573	0.0046
S10_1716185	S5_6529026	0.00749	0.000813	0.0046
S10_17602033	S2_13141127	0.00717	0.000631	0.0065
S10_17602033	S3_183312517	0.00261	0.000392	0.00226
S10_17602033	S6_160328767	0.0066	0.000993	0.00248
S10_17602033	S8_151346820	0.000347	1.22e-05	0.000167
S10_17602033	S9_142946304	0.000114	6.05e-05	0.000146
S10_1883817	S1_293942416	0.109	0.000688	0.0833
S10_1883817	S1_298584786	0.00281	0.000165	0.00248
S10_1883817	S2_182657517	0.0129	0.000996	0.00675
S10_1883817	S2_188901776	0.018	0.000725	0.0176
S10_1883817	S5_213293424	0.00538	0.000171	0.00408
S10_1883817	S9_145282309	0.000472	8.7e-05	0.000799
S10_1928735	S1_188109650	0.000982	0.00585	0.00288
S10_1928735	S1_198279139	0.00399	0.000463	0.00153
S10_1928735	S1_206308168	4.1e-06	0.000337	0.000887
S10_1928735	S1_220059220	0.00873	0.000225	0.00302
S10_1928735	S1_229898788	0.000158	0.00186	0.00734
S10_1928735	S1_249319740	7.94e-05	0.000104	0.000227
S10_1928735	S1_255089284	0.000323	0.000143	0.00281
S10_1928735	S1_264953740	9.05e-05	0.00435	0.00272
S10_1928735	S1_269304434	0.0124	0.000671	0.0126
S10_1928735	S1_273696896	0.000122	0.031	0.0128
S10_1928735	S1_273781985	0.00167	0.000744	0.00308
S10_1928735	S1_287803582	4.8e-05	1.9e-05	0.000328
S10_1928735	S1_290201011	0.00115	0.000162	0.00588
S10_1928735	S1_295109886	0.00318	0.000685	0.00728
S10_1928735	S1_296189841	0.000132	9.63e-06	0.000221
S10_1928735	S1_3040475	0.00913	0.000864	0.0119
S10_1928735	S1_37209351	8.75e-05	2.63e-05	8.36e-05
S10_1928735	S2_10650692	0.000521	5.3e-06	0.000357
S10_1928735	S2_143485578	0.00171	0.000121	0.00127
S10_1928735	S2_175088917	0.00873	0.000952	0.00501
S10_1928735	S2_178262734	0.000841	0.0229	0.0234
S10_1928735	S2_180526645	0.000387	0.00288	0.00348
S10_1928735	S2_184968171	0.00469	0.000377	0.0048
S10_1928735	S2_186639833	0.00451	0.000833	0.00449
S10_1928735	S2_188901776	1.63e-06	0.000346	0.000186
S10_1928735	S2_207839976	0.00101	0.000291	0.00564
S10_1928735	S2_213801417	0.0168	0.00094	0.00794
S10_1928735	S2_217406209	4.96e-05	0.000416	0.000671
S10_1928735	S2_2224796	0.00145	7.57e-05	0.000787
S10_1928735	S2_225651544	0.00369	0.000333	0.00533
S10_1928735	S2_232721336	0.0029	6.29e-06	7.88e-05
S10_1928735	S2_233480628	0.00343	0.00011	0.000442
S10_1928735	S2_3806475	1.75e-05	0.000735	0.00321
S10_1928735	S2_41303474	0.000141	0.00234	0.000945
S10_1928735	S2_49060748	8.8e-05	0.000997	0.00603
S10_1928735	S2_6177433	6.22e-05	0.000118	0.0012
S10_1928735	S2_6338854	0.000179	0.000532	0.00142
S10_1928735	S3_177442272	0.0164	0.000823	0.00471
S10_1928735	S3_189472296	0.0024	0.000969	0.00628
S10_1928735	S3_210755813	0.000504	0.00293	0.00866
S10_1928735	S3_223172096	0.0241	0.000798	0.015
S10_1928735	S3_225548510	0.000753	0.000164	0.00129
S10_1928735	S3_30125641	4.83e-09	4.44e-11	1.16e-07
S10_1928735	S3_5566799	0.000184	0.00495	0.00873
S10_1928735	S3_7275788	0.000553	0.00277	0.00852
S10_1928735	S4_157631782	0.000514	0.0225	0.00611
S10_1928735	S4_16213189	0.00364	0.00065	0.00635
S10_1928735	S4_174012093	0.000421	0.000788	0.00388
S10_1928735	S4_178587699	0.00016	7.66e-05	0.00329
S10_1928735	S4_17978482	9.17e-05	0.000182	0.00114
S10_1928735	S4_180623850	4.93e-05	1.78e-07	1e-05
S10_1928735	S4_223519868	0.00061	0.00142	0.00362
S10_1928735	S4_227274185	5.65e-05	0.000161	0.00127
S10_1928735	S4_235601592	0.000104	0.000134	0.000668
S10_1928735	S4_237269376	0.000357	3.36e-05	0.00174
S10_1928735	S4_237954033	0.000162	0.000486	0.00349
S10_1928735	S4_3048559	0.000183	0.000408	0.000922
S10_1928735	S4_39243786	0.000942	0.000655	0.00769
S10_1928735	S4_41841994	0.000673	0.00271	0.014
S10_1928735	S4_7010265	0.000314	0.00017	0.000864
S10_1928735	S4_90676084	0.000698	0.0261	0.0197
S10_1928735	S5_12275688	0.000139	2.98e-05	0.000108
S10_1928735	S5_17115812	0.000779	0.0175	0.00817
S10_1928735	S5_172920541	0.00126	0.000159	0.00075
S10_1928735	S5_195419440	0.00108	4.74e-05	0.00103
S10_1928735	S5_200117741	0.00024	0.00572	0.00851
S10_1928735	S5_204064923	3.59e-05	2.9e-05	0.000815
S10_1928735	S5_207127752	0.000252	9.72e-06	0.000154
S10_1928735	S5_208682671	2.08e-05	2.05e-05	0.00445
S10_1928735	S5_210303024	0.000303	0.00269	0.00819
S10_1928735	S5_210649964	0.00266	0.000216	0.00224
S10_1928735	S5_213845674	1.66e-05	6.56e-05	0.000473
S10_1928735	S5_213944893	0.00474	1.67e-05	0.00434
S10_1928735	S5_215020931	2.84e-06	2.58e-05	4.07e-05
S10_1928735	S5_215831730	0.000106	0.00844	0.0113
S10_1928735	S5_4945515	7.68e-06	0.000515	0.000128
S10_1928735	S6_130232936	1.19e-06	1.2e-07	1.19e-05
S10_1928735	S6_149944232	0.0684	0.000791	0.0131
S10_1928735	S6_155650795	0.00118	0.000871	0.00311
S10_1928735	S6_158223246	9.53e-06	1.9e-05	1.57e-05
S10_1928735	S6_160334467	1.49e-06	7.8e-06	0.000209
S10_1928735	S6_162019621	0.000603	0.000357	0.00201
S10_1928735	S6_162482424	0.0205	0.00017	0.00329
S10_1928735	S6_167436380	0.0167	3.56e-06	0.000443
S10_1928735	S7_158160938	0.000475	0.0012	0.0183
S10_1928735	S7_161818341	0.0121	0.000138	0.00296
S10_1928735	S7_171729220	1.97e-05	7.74e-06	6.28e-05
S10_1928735	S7_175278872	6.4e-06	2.91e-07	8.1e-05
S10_1928735	S7_4066463	4.76e-06	5.08e-06	3.72e-05
S10_1928735	S7_8901975	0.0024	0.000439	0.00431
S10_1928735	S8_118778390	0.00025	0.000206	0.000379
S10_1928735	S8_127623226	0.0105	6.06e-05	0.00538
S10_1928735	S8_13203607	0.000904	0.00269	0.0321
S10_1928735	S8_162846072	0.000988	0.000352	0.00886
S10_1928735	S8_173243109	0.000464	5.28e-05	0.00148
S10_1928735	S8_20231165	3.95e-05	0.000502	0.00179
S10_1928735	S8_26861340	0.000416	0.000127	0.000368
S10_1928735	S9_119311982	0.000486	0.00307	0.00404
S10_1928735	S9_13755136	0.000563	5.9e-08	1.47e-05
S10_1928735	S9_146152767	0.00127	0.000879	0.00123
S10_1928735	S9_153413532	2.48e-05	0.00069	0.000602
S10_1928735	S9_154404638	0.00082	0.000285	0.00677
S10_1928735	S9_28846511	0.000287	0.00351	0.00485
S10_2007118	S1_11242783	0.000811	0.000397	0.000983
S10_2007118	S1_12516945	6.6e-05	1.17e-05	5.25e-05
S10_2007118	S1_293944923	0.00285	0.00086	0.00276
S10_2007118	S1_6199531	0.00288	0.000254	0.00208
S10_2007118	S2_217406209	0.00715	0.000452	0.00554
S10_2007118	S2_22756457	0.00076	4.41e-05	0.000679
S10_2007118	S4_234572467	0.000853	0.00209	0.00148
S10_2007118	S5_179855484	0.00313	0.000528	0.00547
S10_2007118	S5_212682910	0.000837	5.82e-05	0.000678
S10_2007118	S7_156788305	0.000571	7.27e-05	0.000288
S10_2007118	S9_146083968	0.00309	0.000258	0.0028
S10_2035068	S1_274991245	0.0073	0.000399	0.0035
S10_2035068	S1_290201011	0.0392	0.000701	0.0394
S10_2035068	S3_229584728	0.000554	0.00192	0.00141
S10_2035068	S8_90967478	0.0151	0.000934	0.0128
S10_2228365	S1_12516945	0.00106	1.69e-05	0.00054
S10_2228365	S1_290201011	0.0214	0.000579	0.00808
S10_2228365	S2_176452360	0.00113	0.000256	0.00128
S10_2228365	S2_178262734	0.00131	0.000266	0.00128
S10_2228365	S2_45767366	0.000736	0.000782	0.000369
S10_2228365	S4_170339246	0.00653	0.000508	0.00192
S10_2228365	S4_227274185	0.00553	0.000828	0.00874
S10_2228365	S5_164361354	0.0177	0.000242	0.0113
S10_2230519	S2_204925491	0.00413	0.000812	0.00328
S10_2230519	S2_222731285	0.0273	0.000636	0.0196
S10_2230519	S2_232528329	0.00422	0.000303	0.00362
S10_2230519	S2_236485859	0.00632	0.000945	0.00623
S10_2230519	S3_30125641	0.00453	0.000148	0.00278
S10_2230519	S4_3746553	0.00522	0.00097	0.00394
S10_2230519	S5_213293424	0.00778	0.000135	0.00536
S10_2230519	S6_96333296	0.0156	0.00079	0.015
S10_2230519	S9_18914601	0.00212	0.000235	0.00173
S10_4527763	S1_208431345	0.0124	0.000337	0.0102
S10_4527763	S1_262513988	0.000448	0.00043	0.000559
S10_4527763	S1_287803582	0.00145	0.00055	0.00208
S10_4527763	S1_293930177	0.00236	0.000134	0.00182
S10_4527763	S2_234441041	0.00428	0.000182	0.0019
S10_4527763	S3_226806793	0.000881	1.88e-06	0.000413
S10_4527763	S5_204590845	0.00874	0.00055	0.00616
S10_4527763	S5_210867065	0.00251	3.31e-05	0.00201
S10_4527763	S6_75749425	0.00285	0.000241	0.00188
S10_4527763	S8_155013102	0.00769	0.000911	0.00562
S10_4527763	S8_164014001	0.00537	0.00087	0.00183
S10_4527763	S9_145063355	0.00124	4.92e-05	0.00141
S10_4527763	S9_148918232	0.00122	0.000975	0.00133
S10_4527763	S9_18914601	0.000755	8.42e-05	0.000639
S10_4527763	S9_4224035	0.00385	0.000398	0.00438
S10_4586049	S1_25387691	0.000674	3.95e-05	0.000605
S10_4586049	S2_196534429	0.0293	0.000653	0.0189
S10_4586049	S3_145787107	0.00695	0.000724	0.00526
S10_4586049	S4_156513213	0.00655	0.000601	0.00398
S10_4586049	S7_161902188	0.00269	0.000154	0.00226
S10_4586049	S7_27978520	0.000477	6.04e-05	0.0004
S10_4747589	S2_217406209	0.000105	0.00013	0.000215
S10_4747589	S2_222731285	0.00995	3.63e-06	0.000231
S10_4747589	S2_27592229	0.00143	0.000365	0.000755
S10_4747589	S3_179796715	0.000144	0.000358	0.000671
S10_4747589	S3_226806793	5.8e-05	4e-07	3.23e-05
S10_4747589	S4_3746553	0.000854	0.00117	0.0014
S10_4747589	S4_39243786	3.18e-06	3.56e-06	6.97e-06
S10_4747589	S4_5708685	0.00393	0.000189	0.00279
S10_4747589	S5_123964811	0.000155	9.61e-05	0.000281
S10_4747589	S5_210690592	0.000479	0.000234	0.000519
S10_4747589	S5_212682910	0.000656	0.000361	0.00139
S10_4747589	S5_215625693	0.00101	0.000335	0.00036
S10_4747589	S5_2400437	0.0039	0.000768	0.00233
S10_4747589	S6_159404959	0.00453	0.000591	0.00359
S10_4747589	S9_7701829	0.00731	0.000691	0.00718
S10_4911610	S10_5642714	0.00306	0.00058	0.0018
S10_4911610	S1_251079368	0.0119	0.000397	0.00685
S10_4911610	S1_9052449	0.0114	0.000279	0.00744
S10_4911610	S3_1613920	0.000953	0.000109	0.000809
S10_4911610	S4_224911596	0.00131	4.08e-05	0.00121
S10_4911610	S4_234572467	0.000647	0.000167	0.000713
S10_4911610	S5_11363645	0.00186	0.000269	0.00123
S10_4911610	S5_213536608	0.000765	0.00128	0.000887
S10_4911610	S6_152509426	0.000677	0.000128	0.000949
S10_4911610	S6_167751036	0.00918	0.000611	0.00847
S10_4911610	S7_14609044	0.00163	0.000632	0.00155
S10_4911610	S7_168404865	0.00383	0.000929	0.00311
S10_4911610	S7_172769301	0.00475	0.000367	0.00437
S10_5642714	S1_9956412	0.00376	0.000333	0.00418
S10_5642714	S2_216609785	9.98e-05	0.000142	0.000109
S10_5642714	S3_1724790	0.00464	0.000689	0.00313
S10_5642714	S4_177326867	0.00467	0.000549	0.0042
S10_5642714	S5_212682910	0.000532	6.1e-05	0.000226
S10_5642714	S5_213944893	0.0707	0.000805	0.0456
S10_5642714	S7_133374178	3.09e-07	5.23e-06	2.8e-06
S10_5642714	S8_130926200	0.0159	0.000603	0.0092
S10_5896644	S2_13873595	0.00594	0.000372	0.00509
S10_5896644	S2_14545408	0.00233	0.000174	0.00208
S10_5896644	S2_232486658	0.00053	0.000146	0.000413
S10_5896644	S2_236485850	0.00599	0.000687	0.00476
S10_5896644	S2_236633509	0.0152	0.000539	0.0151
S10_5896644	S2_7744933	0.0122	0.000653	0.0101
S10_5896644	S4_176502364	0.0016	7.56e-05	0.0015
S10_5896644	S4_177373931	0.0112	0.000137	0.00864
S10_5896644	S5_212505796	0.000828	0.00018	0.000837
S10_5896644	S5_213038583	0.000113	1.21e-06	5.07e-05
S10_5896644	S5_215566562	0.0072	0.00041	0.00507
S10_5896644	S6_92485700	0.000646	0.000202	0.000465
S10_5896644	S8_124288407	0.00397	0.000379	0.00284
S10_5896644	S8_169534522	0.00152	0.000168	0.00126
S10_5896644	S8_173410428	0.0107	0.000669	0.00932
S10_5896644	S9_153844399	2.09e-05	6.37e-06	1.52e-05
S10_5896644	S9_8416672	0.00802	0.00095	0.00642
S10_7104898	S1_29196662	0.00124	0.000422	0.00239
S10_7104898	S4_181998835	0.00195	0.000229	0.00137
S10_7104898	S7_153819731	0.0085	0.000738	0.00551
S10_7104898	S7_159939187	0.000354	0.000382	0.000315
S10_73283178	S3_221581517	0.0139	0.000562	0.00951
S10_73283178	S7_133374178	0.000625	0.000242	0.00122
S10_73622536	S3_3214313	0.00996	0.00038	0.00823
S10_73622536	S5_213076745	0.0126	0.000377	0.0101
S10_73622536	S7_156788305	0.00253	0.000972	0.00215
S10_73622536	S7_174865970	0.00488	0.000493	0.00433
S10_73622536	S7_41539519	0.0102	0.000601	0.00814
S10_73622536	S8_14837806	0.0189	0.000963	0.0112
S10_79136392	S1_264953740	0.00139	0.00202	0.000798
S10_79136392	S1_282745466	0.00757	0.000634	0.00777
S10_79136392	S1_84347629	0.000657	8.92e-06	0.000509
S10_79136392	S2_217406209	0.0137	0.000285	0.014
S10_79136392	S3_157085834	0.0367	0.000271	0.0206
S10_79136392	S3_226806793	0.000227	6.46e-06	0.000179
S10_79136392	S4_12083578	0.000632	2.84e-05	0.000727
S10_79136392	S7_157454683	0.00577	0.000707	0.00468
S10_79136392	S7_2711974	0.0167	0.000477	0.0153
S10_79136392	S9_135834777	0.00374	0.000349	0.00213
S10_79136392	S9_139616743	0.0159	0.000374	0.0116
S10_79537566	S3_30125641	0.00126	0.000665	0.00134
S10_79537566	S5_190244572	0.00921	0.000827	0.00508
S10_79537566	S7_167149679	0.00278	0.000545	0.00132
S10_79537566	S7_175209610	0.00249	0.000495	0.00221
S10_79537566	S7_175278872	0.00299	0.000657	0.00194
S10_79537566	S9_122829779	0.0135	0.000602	0.00501
S10_81442802	S2_228979822	1.4e-05	3.14e-07	1.73e-06
S10_81442802	S2_235888860	0.0005	0.00012	0.000154
S10_81442802	S5_164771433	0.0186	0.00087	0.0127
S10_81442802	S6_166182660	0.0131	0.000381	0.00451
S10_84758011	S1_160127872	0.00672	0.00037	0.00568
S10_84758011	S1_290201011	0.0155	0.000103	0.00838
S10_84758011	S1_296848314	0.00279	0.000977	0.0029
S10_84758011	S1_297608050	0.00206	0.000145	0.00169
S10_84758011	S1_300072619	0.000423	0.00115	0.00213
S10_84758011	S1_72842640	0.000446	9.32e-05	0.000563
S10_84758011	S2_188872686	0.000738	0.000683	0.000905
S10_84758011	S2_22756457	0.0128	0.000292	0.0123
S10_84758011	S2_228979822	5.21e-05	0.000259	0.000125
S10_84758011	S2_6338854	0.0149	0.000627	0.0114
S10_84758011	S3_220844515	0.000519	0.000451	0.000853
S10_84758011	S3_220856200	0.00577	0.000687	0.00299
S10_84758011	S3_25879201	0.00125	5.49e-05	0.00106
S10_84758011	S4_172193066	0.00103	3.14e-05	0.00176
S10_84758011	S4_181876485	0.00758	1.11e-05	0.00506
S10_84758011	S5_213536608	0.00539	0.000229	0.00547
S10_84758011	S5_215931592	0.0104	0.000395	0.00652
S10_84758011	S5_69120089	7.08e-06	5.46e-06	9.13e-06
S10_84758011	S6_155392451	0.00758	0.000178	0.0045
S10_84758011	S6_164729973	9.71e-05	7.94e-05	0.000159
S10_84758011	S6_9497661	0.00414	0.000244	0.00325
S10_84758011	S6_97340097	0.000915	0.000336	0.00111
S10_84758011	S7_124953809	0.000102	0.000416	0.00032
S10_84758011	S7_153819731	0.000712	0.00903	0.00185
S10_84758011	S7_167622106	0.000507	0.000502	0.000465
S10_84758011	S8_168828093	1.38e-05	6.79e-07	2.72e-05
S10_84758011	S8_170224601	0.00252	1.07e-05	0.000943
S10_84758011	S8_171137960	0.0065	0.000512	0.00545
S10_84758011	S8_171877741	0.000852	0.00148	0.00179
S10_84758011	S8_29147147	0.0115	0.000941	0.00984
S10_84758011	S9_59453957	0.00137	0.000866	0.00142
S10_86421301	S1_236232402	0.00396	0.000395	0.00364
S10_86421301	S2_178262734	0.00122	0.00121	0.000936
S10_86421301	S3_178218077	0.00639	0.000472	0.00272
S10_8805537	S2_179808563	0.00358	0.000342	0.00293
S10_8805537	S3_145787107	0.000955	1.86e-05	0.000776
S10_8805537	S3_9808727	0.00124	0.000262	0.00101
S10_8805537	S4_3048559	0.000545	0.000826	0.000433
S10_8805537	S6_158471331	0.0067	0.00028	0.00484
S10_8805537	S7_172163467	0.0142	0.000936	0.00825
S10_8805537	S7_2711974	0.00465	0.000925	0.00379
S10_8805537	S8_171526511	0.00183	0.000548	0.00177
S10_8805537	S9_150249043	0.00738	1.47e-05	0.000969
S10_88396859	S2_228334001	0.0107	0.000285	0.00569
S10_88396859	S5_163411721	0.00133	0.000764	0.00201
S10_88396859	S9_153188212	0.000139	0.00101	0.000629
S10_88396859	S9_7701829	0.00859	0.000985	0.00774
S10_9596345	S3_230442601	0.000924	0.00114	0.00151
S10_9596345	S4_237953848	0.00165	3.59e-05	0.00118
S10_9596345	S4_6601218	0.00187	6.92e-05	0.00123
S10_9596345	S5_3538509	0.00723	0.000516	0.00509
S10_9596345	S6_167646898	0.0026	0.000443	0.00168
S10_9596345	S7_132629901	0.00342	0.000845	0.00407
S10_9596345	S8_127623226	0.00553	0.000639	0.00355
S10_9596345	S8_169534522	0.00756	0.000309	0.0104
S10_99204380	S2_5838435	0.00128	0.000198	0.00126
S10_99204380	S5_200939509	0.00232	0.000446	0.00254
S10_99204380	S7_4066463	0.00513	0.000738	0.00318
S1_11242783	S2_143485578	0.00479	0.000877	0.00361
S1_11242783	S2_178262734	0.00985	0.000706	0.00422
S1_11242783	S2_2224796	0.00268	0.000294	0.00212
S1_11242783	S2_232721336	0.0111	0.000219	0.00851
S1_11242783	S3_199786538	0.00419	0.000478	0.00342
S1_11242783	S4_236371137	0.0304	0.000974	0.0283
S1_11242783	S4_238435996	0.00142	0.000168	0.000288
S1_11242783	S4_5315606	0.000119	0.000319	0.000124
S1_11242783	S5_204866582	0.0105	0.000376	0.00951
S1_11242783	S5_208997571	0.00193	2.82e-05	0.00144
S1_11242783	S5_215649439	0.00118	0.000418	0.00108
S1_11242783	S5_3641192	0.00055	0.000241	0.000371
S1_11242783	S6_165945828	0.00122	0.000815	0.00136
S1_11242783	S6_69261849	0.00218	3.41e-05	0.00164
S1_11242783	S7_159939187	0.00425	0.000131	0.00254
S1_11242783	S8_10760930	0.000295	1.03e-05	0.00028
S1_11242783	S8_13803336	0.0144	0.000451	0.01
S1_11242783	S8_143278419	6.08e-05	1.7e-07	3.46e-05
S1_11242783	S8_169692964	0.00192	0.000674	0.00141
S1_11242783	S8_171526511	0.00255	0.000111	0.00217
S1_11242783	S8_172227318	0.000675	0.00031	0.00064
S1_11242783	S9_146083968	0.00946	0.000277	0.00808
S1_11242783	S9_95741865	0.00454	0.000144	0.00301
S1_115219651	S1_264953740	1.47e-05	5.76e-06	7.86e-06
S1_115219651	S1_43086075	0.0028	0.000485	0.00349
S1_115219651	S2_188901776	0.00659	0.00018	0.00443
S1_115219651	S3_230179656	5.48e-05	1.39e-06	8.63e-07
S1_115219651	S4_180623850	0.0186	0.000631	0.0105
S1_115219651	S4_237269376	0.0221	0.000645	0.0276
S1_115219651	S5_211666978	0.00505	0.000363	0.00169
S1_115219651	S8_8122936	0.0191	0.000153	0.0152
S1_115219651	S9_153878527	0.00258	4.49e-05	0.00152
S1_119551241	S1_251079368	0.0323	0.000481	0.0204
S1_119551241	S1_279424101	0.000812	0.0006	0.00085
S1_119551241	S3_150390851	0.0369	6.92e-05	0.0203
S1_119551241	S5_190476896	0.00211	0.000742	0.00486
S1_119551241	S7_127253492	0.00051	0.000466	0.000569
S1_119551241	S7_173194482	0.000883	0.00337	0.00141
S1_121554346	S2_207040863	0.0115	0.000363	0.00926
S1_121554346	S2_217406209	0.00607	0.00066	0.0075
S1_121554346	S5_205235001	0.00431	0.000318	0.00414
S1_121554346	S6_92485700	2.15e-05	8.54e-06	2.1e-05
S1_121554346	S8_124937577	0.00813	0.000203	0.00543
S1_121554346	S9_120939794	0.00657	0.000136	0.00527
S1_12169701	S1_290201011	0.0176	0.00077	0.0121
S1_12169701	S2_144983633	0.00781	0.000592	0.00641
S1_12169701	S2_234015237	0.0147	0.000983	0.0134
S1_12169701	S4_172193066	0.00432	0.000611	0.00276
S1_12169701	S5_205728005	0.00485	0.000533	0.0038
S1_12169701	S5_206186220	0.000336	0.000262	0.000541
S1_12169701	S6_111367431	0.00558	0.000465	0.00475
S1_12169701	S6_155392451	4.02e-05	8.95e-06	4.46e-05
S1_12169701	S7_124953809	0.0012	0.000355	0.0011
S1_12169701	S7_168289948	0.000963	3.28e-05	0.000672
S1_12169701	S8_169692964	0.014	0.000407	0.0118
S1_12344470	S2_225826086	0.0157	0.000434	0.0141
S1_12344470	S3_211020781	0.00557	0.000361	0.00448
S1_12344470	S4_2839120	0.00976	0.000538	0.00696
S1_12344470	S6_160037746	0.00724	0.000391	0.00564
S1_12344470	S7_162068277	0.00118	2.08e-05	0.000418
S1_12344470	S9_13462585	0.000307	0.000218	0.000595
S1_12344470	S9_13663242	5.5e-05	4.32e-07	7.46e-05
S1_12516945	S1_188109650	3.03e-06	8.47e-10	1.36e-06
S1_12516945	S1_258875029	0.0167	0.000414	0.0144
S1_12516945	S1_276119307	0.00106	4.36e-05	0.000838
S1_12516945	S1_9956412	0.0062	0.000753	0.00518
S1_12516945	S2_1776499	0.00569	0.000109	0.00533
S1_12516945	S4_239001389	0.00568	0.000624	0.00506
S1_12516945	S5_191370890	0.00118	0.000283	0.0012
S1_12516945	S5_211666978	2.85e-05	3.15e-06	0.000111
S1_12516945	S7_163611976	0.000245	2.12e-05	0.000244
S1_12516945	S7_165746252	8.47e-05	1.12e-05	5.59e-05
S1_12516945	S7_168388048	0.0217	0.000718	0.0193
S1_12516945	S8_124937577	0.00203	0.000121	0.00165
S1_12516945	S8_169692964	0.000185	3.96e-05	0.000163
S1_12516945	S8_6592186	0.000173	0.000131	0.00018
S1_12516945	S8_83795739	0.00503	0.000229	0.0037
S1_12516945	S9_150249043	0.104	0.000882	0.0559
S1_12516945	S9_150887329	0.00436	0.000182	0.00307
S1_12663168	S1_273352945	0.0212	3.01e-05	0.00613
S1_12663168	S3_2920271	0.0259	0.000852	0.0197
S1_12663168	S6_110534889	0.00378	0.000125	0.00232
S1_12663168	S6_164893186	0.0794	0.000911	0.0867
S1_12663168	S8_171744826	0.00224	0.000149	0.00199
S1_128554994	S6_111367431	0.00353	0.000663	0.00283
S1_12990921	S1_270031325	0.00233	0.000126	0.00214
S1_12990921	S2_180165786	0.000831	0.000181	0.00117
S1_12990921	S2_18210382	0.00055	9.76e-05	0.000589
S1_12990921	S5_11363645	0.0263	0.000663	0.023
S1_12990921	S7_172163467	0.000988	0.00281	0.00284
S1_12990921	S7_2915205	0.000948	0.000671	0.000626
S1_15075522	S8_169064123	0.00637	0.000307	0.00542
S1_15075522	S8_171542360	0.00728	0.000141	0.00862
S1_15075522	S9_146152767	0.00145	0.000131	0.00159
S1_154079997	S2_222962784	0.0139	0.000968	0.0136
S1_154079997	S3_216987551	0.00228	0.000404	0.00238
S1_154079997	S7_172768026	0.00115	0.000455	0.00153
S1_154079997	S8_127623226	0.00356	0.000118	0.00187
S1_154079997	S9_135888196	0.00343	0.000197	0.00209
S1_15805542	S1_293942416	0.0425	0.000506	0.0139
S1_15805542	S1_3040475	0.0117	0.000823	0.0139
S1_15805542	S2_217406209	0.00347	0.000615	0.00368
S1_15805542	S4_234499424	0.0015	0.000681	0.00152
S1_15805542	S4_238435996	7.77e-06	2.4e-05	1.09e-05
S1_15805542	S5_11363645	0.0119	0.000971	0.0119
S1_15805542	S5_212378314	0.00315	0.000118	0.00251
S1_15805542	S6_160334467	0.000771	0.000311	0.000604
S1_15805542	S6_165586391	0.00687	0.000719	0.00548
S1_15805542	S7_133374178	0.00189	0.000336	0.000756
S1_15805542	S7_167149679	0.00159	0.000376	0.00143
S1_15805542	S7_168166749	0.00996	0.000282	0.00568
S1_15805542	S9_151276228	0.0115	0.000341	0.0091
S1_15805542	S9_17632988	0.00196	0.000385	0.00134
S1_160127872	S1_214308375	0.0037	0.000354	0.00211
S1_160127872	S1_256490847	0.0166	0.000773	0.0101
S1_160127872	S1_294658748	0.0239	0.000804	0.0146
S1_160127872	S1_297608050	0.00288	0.000555	0.00259
S1_160127872	S2_168982608	0.0028	0.000531	0.00253
S1_160127872	S3_169216129	0.0027	0.000112	0.00183
S1_160127872	S3_215536298	0.0089	0.000184	0.00458
S1_160127872	S3_220849518	0.00837	0.000503	0.00565
S1_160127872	S3_227281351	0.0134	0.000385	0.0108
S1_160127872	S3_2458485	0.00812	0.000947	0.00752
S1_160127872	S4_170339246	8.35e-05	1.87e-06	6.15e-05
S1_160127872	S4_171788276	0.00515	0.000175	0.0017
S1_160127872	S5_214710680	0.00581	0.000743	0.00565
S1_160127872	S6_92485700	0.00232	0.000293	0.00231
S1_160127872	S7_158160938	0.00511	0.00012	0.00329
S1_160127872	S7_175278872	0.00594	0.000724	0.00622
S1_160127872	S7_8049913	0.00695	0.000731	0.00569
S1_160127872	S8_104463843	0.00344	0.000998	0.00414
S1_160127872	S8_119646326	0.00991	0.00023	0.00686
S1_160127872	S8_12990030	0.00705	0.000151	0.00421
S1_160127872	S8_157922806	0.00375	0.000532	0.00343
S1_160127872	S8_2428521	0.000274	8.18e-07	0.000237
S1_160127872	S9_135888196	0.0182	0.000918	0.012
S1_160127872	S9_154404638	0.00127	0.000126	0.00102
S1_160127872	S9_154460644	0.00538	0.000953	0.00527
S1_160127872	S9_5319969	0.0151	0.000874	0.014
S1_164369559	S1_289347748	0.00557	0.000305	0.00344
S1_164369559	S1_298272194	0.00212	0.000293	0.00179
S1_164369559	S4_226619872	0.0299	0.000536	0.018
S1_164369559	S4_238435996	0.00293	8.03e-05	0.00131
S1_164369559	S5_48501512	0.000193	0.000774	0.000359
S1_173238086	S1_184614464	0.0232	0.000593	0.0185
S1_173238086	S1_251172520	0.00192	0.000153	0.00163
S1_173238086	S1_272839586	0.00573	0.000143	0.00466
S1_173238086	S2_3806475	0.0044	0.000675	0.00296
S1_173238086	S4_171126551	0.0127	0.000875	0.0119
S1_173238086	S6_167576639	0.00396	0.00055	0.00211
S1_173238086	S6_93731500	0.00211	0.000104	0.00231
S1_17679542	S1_290121033	0.00063	1e-05	0.000324
S1_17679542	S2_10543889	0.000478	0.000164	0.000772
S1_17679542	S2_179438095	0.00182	4.45e-05	0.00165
S1_17679542	S2_2224796	0.00345	0.000762	0.00413
S1_17679542	S2_228876769	4.33e-05	0.000125	6.71e-05
S1_17679542	S2_7744933	0.009	0.000826	0.0107
S1_17679542	S3_146602339	0.0093	0.000933	0.00731
S1_17679542	S3_226807868	0.00104	0.000134	0.000745
S1_17679542	S3_229084340	0.0284	0.000873	0.0246
S1_17679542	S3_2629620	0.00363	0.000261	0.00419
S1_17679542	S5_1026096	0.000303	0.000242	0.000508
S1_17679542	S6_148705979	0.00909	0.000142	0.00334
S1_17679542	S6_167751036	0.00831	0.000539	0.00532
S1_17679542	S7_103946623	0.00079	0.000246	0.000979
S1_17679542	S7_172768026	0.000755	0.00035	0.000651
S1_17679542	S8_21699903	0.0162	0.000756	0.0102
S1_17679542	S8_6397888	0.000399	0.00054	0.00103
S1_17679542	S9_13663242	0.00529	0.000928	0.00791
S1_17679542	S9_7615114	0.00242	0.000309	0.000915
S1_177766453	S4_20100579	0.00334	0.000895	0.00337
S1_177766453	S5_172920541	0.00426	0.000109	0.00294
S1_177766453	S6_153101499	0.0263	0.000939	0.0206
S1_184612485	S5_12363960	0.000397	0.000103	0.000344
S1_184612485	S6_131958522	0.000462	3.79e-05	0.000396
S1_184612485	S7_103946623	0.0186	0.000796	0.0106
S1_184612485	S7_161902188	0.00229	0.000463	0.00295
S1_184612485	S7_172108409	0.0187	0.000202	0.0143
S1_184612485	S8_139594572	0.00282	0.00031	0.00213
S1_184612485	S9_102323942	0.00477	0.000421	0.00287
S1_184614464	S2_27592229	0.00828	0.00044	0.00793
S1_184614464	S4_2409520	0.000562	0.000301	0.000429
S1_184614464	S4_4129504	0.032	0.000901	0.021
S1_184614464	S6_164680967	0.0213	0.000886	0.0183
S1_184614464	S7_162957430	9.27e-05	1.25e-05	6.43e-05
S1_184614464	S7_8049913	0.0012	6.58e-05	0.000628
S1_184614464	S8_164014001	0.00243	0.000169	0.00263
S1_184614464	S8_72977857	0.0068	4.69e-05	0.00229
S1_184614464	S9_149246655	0.00994	0.000692	0.00833
S1_188109650	S1_264953740	0.013	0.00063	0.0155
S1_188109650	S2_196534429	0.0273	0.000468	0.0188
S1_188109650	S3_175518287	0.00943	0.000311	0.00615
S1_188109650	S3_200187159	0.000329	7.26e-06	0.000264
S1_188109650	S4_10795804	0.0173	0.000532	0.00171
S1_188109650	S4_172193066	0.0144	0.000191	0.00303
S1_188109650	S4_236937890	0.077	0.000727	0.0584
S1_188109650	S4_238435996	0.0109	0.000558	0.00896
S1_188109650	S4_3048559	0.0009	7.83e-05	0.000738
S1_188109650	S5_190476896	0.00714	0.000301	0.0048
S1_188109650	S5_204064923	0.00751	0.000821	0.00435
S1_188109650	S5_7603598	0.002	0.000613	0.00152
S1_188109650	S6_105408548	0.00925	4.94e-05	0.00599
S1_188109650	S8_167471340	1.22e-05	8.84e-07	1.3e-05
S1_188109650	S9_10942796	0.028	0.000834	0.0139
S1_189190087	S1_291258884	0.0269	0.000864	0.0218
S1_189190087	S5_2400437	0.00358	0.000879	0.00291
S1_189190087	S6_158223246	0.00797	0.000542	0.00637
S1_189190087	S8_12990030	0.00291	0.000133	0.0041
S1_189190087	S9_18914601	0.0071	0.00052	0.00565
S1_191852498	S1_262937140	0.02	0.00071	0.0156
S1_191852498	S2_208610387	0.00642	0.000899	0.00718
S1_191852498	S5_195419440	0.00213	3.79e-05	0.00152
S1_191852498	S7_131445903	0.00117	0.000443	0.000679
S1_191852498	S8_170224601	0.000699	7.17e-05	0.00158
S1_191852498	S9_153592103	0.00629	0.000285	0.00372
S1_19356020	S1_273696896	1.98e-06	7.72e-07	9.75e-06
S1_19356020	S4_174959291	0.000906	0.000437	0.000952
S1_19356020	S5_198820839	0.00017	0.000439	0.000321
S1_19356020	S6_162991693	0.00826	0.000864	0.00797
S1_19356020	S6_165945828	0.0101	0.000212	0.00722
S1_19356020	S6_97320326	0.00534	0.000271	0.0069
S1_19356020	S7_133374178	0.000341	0.000718	0.00468
S1_19356020	S7_158160938	0.0063	7.55e-05	0.00493
S1_19356020	S7_174282816	0.0035	0.000802	0.00269
S1_19356020	S8_173506560	0.00325	0.000251	0.00229
S1_193838523	S1_25387691	0.00139	7.07e-05	0.00124
S1_193838523	S2_222220011	0.00545	0.000301	0.00467
S1_193838523	S2_236485859	0.00401	0.000127	0.0027
S1_193838523	S3_182046436	0.000573	0.00422	0.00171
S1_193838523	S6_122664525	0.0233	0.000489	0.0167
S1_193838523	S6_154165681	0.00835	0.000844	0.00485
S1_193838523	S7_131127224	0.00353	0.000496	0.00304
S1_193838523	S9_140974405	0.0152	0.000732	0.0114
S1_193838523	S9_149552629	0.00134	0.00049	0.0016
S1_198279139	S2_6191040	0.000941	0.00064	0.000269
S1_198279139	S5_142722810	0.000195	0.000263	0.000183
S1_198279139	S5_179855484	0.0125	0.000228	0.00533
S1_198279139	S6_114937259	0.0126	0.000938	0.00257
S1_198279139	S7_146239745	0.000342	0.00302	0.00572
S1_198279139	S9_9640610	0.00255	0.000834	0.00208
S1_199117304	S2_2224796	0.00164	0.000139	0.00312
S1_199117304	S4_2409520	0.0037	0.000351	0.00309
S1_199117304	S5_204590845	0.00661	0.000552	0.00529
S1_199117304	S7_4840638	0.00583	0.000712	0.00504
S1_199117304	S8_171137960	0.0127	0.000631	0.0104
S1_199117304	S9_10942796	0.00696	0.000604	0.00608
S1_199117304	S9_136787013	0.000194	0.000291	0.000254
S1_200016826	S1_264953740	0.00191	0.000214	0.00065
S1_200016826	S1_298437740	0.00335	0.000629	0.00405
S1_200016826	S2_236485859	0.00488	0.000265	0.00408
S1_200016826	S3_224001472	0.00248	0.000741	0.00227
S1_200016826	S5_190476896	0.0226	0.000404	0.0107
S1_200016826	S6_130232936	0.00851	0.000478	0.00616
S1_200250303	S5_190476896	0.0146	0.00078	0.0134
S1_202298460	S1_8623369	0.00734	0.000785	0.00667
S1_202298460	S5_210869357	0.0634	0.000754	0.0339
S1_202550281	S2_3806475	0.00971	0.000214	0.00829
S1_202550281	S3_13484401	0.0014	0.000333	0.000994
S1_202550281	S3_225759878	0.00453	0.000326	0.0042
S1_202550281	S5_174937204	0.0018	7.32e-05	0.0017
S1_202550281	S5_194340128	0.00291	0.00065	0.00192
S1_202550281	S5_5378919	0.0053	0.000747	0.00518
S1_202550281	S6_151126988	0.00486	0.000283	0.00377
S1_202550281	S7_172769301	0.0137	0.000318	0.0118
S1_202550281	S9_144376310	0.00873	0.000577	0.00597
S1_204292903	S4_239413509	0.000288	8.55e-05	0.000383
S1_204292903	S4_6598081	0.0709	0.000766	0.0521
S1_204292903	S9_5319969	0.00182	0.000656	0.00185
S1_205574453	S1_25387691	0.00872	0.000623	0.0123
S1_205574453	S5_203402855	0.00373	0.000386	0.00253
S1_205574453	S5_213588627	0.0218	0.000531	0.0206
S1_205574453	S6_108802100	0.00437	0.000787	0.00522
S1_205574453	S7_146239745	0.00261	3.07e-05	0.00389
S1_205574453	S7_174574340	0.00894	0.000554	0.00955
S1_205574453	S7_8901975	0.0244	0.000782	0.026
S1_205574453	S8_157407263	0.0312	0.000218	0.0214
S1_205574453	S8_166796086	0.000595	1.18e-06	0.000324
S1_205574453	S9_146083968	0.0169	0.000349	0.011
S1_206123805	S1_287981955	0.000915	0.000352	0.00107
S1_206123805	S1_296662411	0.00218	0.000663	0.00212
S1_206123805	S2_13873595	0.00247	5.13e-05	0.00232
S1_206123805	S2_218845350	0.0284	0.000653	0.0194
S1_206123805	S4_12083578	0.000419	1.82e-05	0.000274
S1_206123805	S4_4129504	0.00566	0.000615	0.00524
S1_206123805	S7_172108409	0.00196	0.000729	0.00282
S1_206123805	S7_28361010	3.47e-05	4.37e-06	6.15e-05
S1_206123805	S8_21294847	0.006	0.000409	0.0043
S1_206123805	S9_119311982	0.00958	0.000384	0.0057
S1_206308168	S1_295349423	0.00351	0.000184	0.00346
S1_206308168	S2_10543889	6.3e-06	2.03e-05	2.81e-05
S1_206308168	S2_3806475	0.00731	0.000217	0.00568
S1_206308168	S3_219185438	6e-06	1.33e-06	4.29e-06
S1_206308168	S5_207664577	0.0251	0.000759	0.0205
S1_206308168	S5_32000019	0.00641	0.000606	0.00395
S1_206308168	S6_56539386	0.000682	0.000841	0.00057
S1_206308168	S7_133374178	0.000333	0.01	0.0163
S1_206308168	S8_76529972	4.14e-05	5.37e-05	3.06e-05
S1_206789090	S1_233446847	0.0109	0.000262	0.0112
S1_206789090	S1_253391071	9.23e-05	5.21e-05	0.000105
S1_206789090	S2_1209992	0.00884	0.000748	0.00546
S1_206789090	S2_170297810	0.0179	0.000833	0.0121
S1_206789090	S5_2400437	0.0158	0.000842	0.0127
S1_206789090	S7_159410691	0.00274	0.000544	0.00289
S1_206789090	S7_172163467	0.00839	0.00086	0.00896
S1_206789090	S7_174574340	0.000772	0.000548	0.00075
S1_208431345	S1_251172520	0.0604	0.000802	0.042
S1_208431345	S1_273696896	0.00129	0.000762	0.000943
S1_208431345	S3_225137577	0.00435	0.000828	0.00509
S1_208431345	S4_236171246	0.000929	0.000431	0.000735
S1_208431345	S4_237319591	0.000667	3.25e-05	0.000383
S1_208431345	S4_3746553	0.00517	0.000147	0.00384
S1_208431345	S5_215783902	0.00357	0.00029	0.00254
S1_208431345	S6_160334467	0.00573	0.000439	0.00609
S1_208431345	S6_165316207	0.00831	8.89e-05	0.00197
S1_208431345	S7_161620348	0.00152	0.000513	0.00126
S1_208431345	S7_164656205	0.00356	0.000465	0.00352
S1_208431345	S7_167853871	0.00523	0.000232	0.00351
S1_208431345	S8_171037631	0.0187	0.000602	0.0127
S1_208431345	S9_142051997	0.0124	0.000913	0.0101
S1_212168075	S3_3836315	0.000743	3.44e-06	0.000494
S1_212168075	S4_239154878	0.00478	0.000783	0.00447
S1_212168075	S4_5406529	0.00997	0.000985	0.00836
S1_212168075	S5_179855484	0.0107	0.00077	0.00725
S1_212168075	S5_205155852	0.000641	0.000299	0.000485
S1_212168075	S7_162340878	0.0527	0.000548	0.0361
S1_213459962	S1_267956655	0.000647	0.000527	0.000565
S1_213459962	S1_292078249	0.00751	0.000105	0.00693
S1_213459962	S2_222731285	0.0171	0.000939	0.0284
S1_213459962	S3_155961960	0.0248	0.000897	0.015
S1_213459962	S5_204866582	0.0402	0.000565	0.0256
S1_214308375	S4_237777048	0.000245	8.86e-06	0.000209
S1_214308375	S9_109897894	0.00185	0.000461	0.002
S1_216929344	S1_246816505	0.000206	0.000895	0.000501
S1_216929344	S1_273781985	0.012	0.000292	0.00472
S1_216929344	S1_293942416	0.000215	7.09e-06	0.000176
S1_216929344	S2_185024760	0.00183	0.000317	0.00152
S1_216929344	S3_176333348	0.00654	0.000621	0.00325
S1_216929344	S3_180510802	0.00246	2.81e-05	0.000901
S1_216929344	S4_130030028	0.0105	0.000615	0.00729
S1_216929344	S4_174012093	0.0019	3.07e-05	0.00117
S1_216929344	S4_184676809	0.0172	0.000468	0.0157
S1_216929344	S5_203614830	0.00522	0.00089	0.00589
S1_216929344	S7_27311620	0.00235	0.00046	0.00315
S1_217210507	S1_251172520	0.0199	0.000264	0.012
S1_217210507	S1_264953740	0.0067	9.33e-05	0.00314
S1_217210507	S1_6199531	0.00112	0.000416	0.00128
S1_217210507	S2_6191040	0.00329	0.000293	0.00205
S1_217210507	S2_9087222	0.000562	0.00031	0.000714
S1_217210507	S3_180510802	0.000191	2.1e-05	0.000281
S1_217210507	S4_171558983	0.00267	0.000318	0.0026
S1_217210507	S5_187572309	0.00425	2.43e-05	0.00253
S1_217210507	S5_216440094	0.000741	6.53e-07	0.000121
S1_217210507	S6_154165681	0.00557	0.000867	0.00526
S1_217210507	S6_165586391	3.04e-05	4.14e-06	3.4e-05
S1_217210507	S6_75749425	0.00133	8.2e-06	0.00086
S1_217210507	S8_11485031	0.000861	0.000269	0.00118
S1_217210507	S8_168828093	0.0103	0.000891	0.00361
S1_220059220	S1_264953740	0.00021	0.000511	0.000302
S1_220059220	S1_2727739	0.00333	7.29e-05	0.00235
S1_220059220	S1_290820556	0.00065	0.00519	0.000859
S1_220059220	S2_188901776	0.000529	2.47e-06	0.000437
S1_220059220	S4_17742579	0.000232	4.64e-05	0.000237
S1_220059220	S5_210867065	0.000108	2.03e-05	0.000253
S1_220059220	S5_216440094	8.13e-05	5.41e-05	0.000256
S1_220059220	S7_133374178	5.45e-05	1.26e-05	0.000184
S1_220059220	S7_172768026	2.05e-05	2.55e-05	2.68e-05
S1_220059220	S9_117045500	0.00271	0.000136	0.00178
S1_221741426	S1_29196662	0.000864	0.000116	0.00226
S1_221741426	S1_293930177	0.0058	0.000997	0.00475
S1_221741426	S2_14545408	0.0623	0.000335	0.0329
S1_221741426	S2_18210382	0.00161	0.000299	0.00115
S1_221741426	S3_4552619	0.00934	0.000124	0.00668
S1_221741426	S4_178494167	7.77e-05	5.58e-05	0.0001
S1_221741426	S4_17978482	0.000411	0.000308	0.000419
S1_221741426	S5_12275688	0.00787	0.000964	0.00786
S1_221741426	S5_187572309	0.00653	0.000368	0.00399
S1_221741426	S5_195419440	0.00757	0.000118	0.00322
S1_221741426	S6_111022510	0.00823	0.000927	0.00591
S1_221741426	S7_9340960	0.00875	0.000456	0.00787
S1_221741426	S8_168828093	5.39e-06	9.68e-08	5.56e-06
S1_221741426	S8_173410428	0.00804	0.000657	0.00263
S1_221741426	S9_109897894	0.00928	0.00033	0.00747
S1_222300868	S1_292078249	0.000575	1.24e-05	0.000446
S1_222300868	S2_12798571	0.0226	0.000123	0.0129
S1_222300868	S2_18210382	0.000225	1.93e-06	0.000168
S1_222300868	S3_1462146	0.00176	0.000234	0.00148
S1_222300868	S3_223172096	0.00748	0.000505	0.00524
S1_222300868	S3_224499810	0.00251	0.000308	0.00216
S1_222300868	S4_34996945	0.000302	0.000482	0.000458
S1_222300868	S5_187572309	0.000348	3.67e-05	0.00024
S1_222300868	S5_188779691	0.000163	1.4e-07	5.62e-05
S1_222300868	S5_212748793	0.0073	0.00072	0.00774
S1_222300868	S5_6529026	0.00189	0.000879	0.00179
S1_222300868	S6_112349494	0.00311	0.000224	0.00215
S1_222300868	S6_75749425	2.6e-05	7.57e-07	2.35e-05
S1_222300868	S7_159410691	0.0277	0.000504	0.0158
S1_222300868	S8_119646326	0.00321	0.000641	0.00234
S1_222300868	S8_18781389	0.00497	0.000217	0.00346
S1_222300868	S9_152481336	0.0166	0.00068	0.0132
S1_222300868	S9_153886804	0.00289	0.000226	0.00229
S1_222300868	S9_154460644	0.0117	0.00093	0.00659
S1_222300868	S9_8458872	0.00134	4.39e-05	0.000935
S1_222300868	S9_95741865	0.0325	0.000631	0.0186
S1_22259689	S2_206902934	0.00287	0.000454	0.00286
S1_22259689	S2_217406209	0.0216	0.000822	0.0145
S1_22259689	S2_225651544	0.00336	0.000229	0.00506
S1_22259689	S4_170339246	0.00183	0.000649	0.00193
S1_22259689	S5_179928953	0.00141	0.000999	0.00141
S1_22259689	S5_187572309	0.00844	0.000502	0.00484
S1_22259689	S5_194044607	0.00627	0.000911	0.00744
S1_22259689	S5_3641192	0.00231	0.000596	0.0019
S1_22259689	S9_153775536	0.00707	6.25e-05	0.0047
S1_223759582	S1_8538275	0.00125	0.000705	0.000928
S1_223759582	S2_196295156	0.00198	0.000967	0.00221
S1_223759582	S3_200187159	0.0342	0.000923	0.0239
S1_223759582	S5_7261322	0.00167	0.000228	0.00165
S1_223759582	S8_164626896	0.00084	0.000432	0.000913
S1_223759582	S8_170708098	0.00975	0.000907	0.00862
S1_226222075	S1_6199531	0.00287	0.000509	0.00397
S1_226222075	S2_179808563	0.000732	0.000365	0.000936
S1_226222075	S2_185691168	0.00826	0.000817	0.00838
S1_226222075	S2_232597945	0.00759	0.000675	0.00684
S1_226222075	S2_9549729	0.000638	0.000121	0.00103
S1_226222075	S3_180510802	0.00903	0.000229	0.00758
S1_226222075	S3_211020781	0.00153	0.00182	0.000885
S1_226222075	S4_239488760	0.0337	0.000135	0.0169
S1_226222075	S5_163411721	0.00166	0.000135	0.00164
S1_226222075	S5_186725422	0.0119	0.000298	0.0104
S1_226222075	S5_194560514	0.00314	0.000214	0.00229
S1_226222075	S5_4201364	0.000307	0.00184	0.000699
S1_226222075	S6_6430741	0.00767	0.000438	0.00644
S1_226222075	S7_173431320	0.0531	0.000807	0.0173
S1_226222075	S8_145847482	0.00592	0.000437	0.00613
S1_226222075	S8_3240838	0.0162	0.000614	0.00918
S1_226222075	S9_137786926	0.0108	0.00057	0.00909
S1_226222075	S9_154576594	0.00193	0.000211	0.00184
S1_226539246	S3_150390851	0.041	0.000864	0.0348
S1_226539246	S3_230442601	0.0028	0.000203	0.00295
S1_226539246	S5_205942760	0.0115	0.000563	0.00918
S1_226539246	S5_30754849	0.000344	4.92e-05	0.000459
S1_226539246	S6_92485700	0.00149	0.00054	0.00196
S1_226539246	S7_132629901	0.00623	0.000547	0.00573
S1_226539246	S8_83795739	0.0164	0.000507	0.00919
S1_226539246	S9_141841283	0.00109	4.76e-05	0.000849
S1_227316583	S1_80918894	0.000825	0.000156	0.000793
S1_227316583	S2_218845350	0.00659	0.000209	0.00699
S1_227316583	S2_26287935	0.0027	0.000364	0.00194
S1_227316583	S2_79769999	0.00347	0.000755	0.00268
S1_227316583	S4_7010265	0.00122	9.46e-05	0.0012
S1_227316583	S5_11363645	0.00178	0.000887	0.00155
S1_227316583	S8_14837806	0.0159	0.000817	0.0132
S1_227316583	S8_21700404	0.00648	0.000679	0.00572
S1_227316583	S9_154576594	0.00406	0.000433	0.00411
S1_229898788	S1_246816505	0.000592	0.0014	0.00107
S1_229898788	S2_228876769	0.000138	2.41e-06	6.04e-05
S1_229898788	S3_223537211	0.00481	0.000237	0.00658
S1_229898788	S5_205147938	0.00738	7.76e-05	0.00593
S1_229898788	S5_215649439	0.000351	9.46e-05	0.000206
S1_230720299	S1_290201011	0.00289	3.35e-05	0.00236
S1_230720299	S1_43086075	0.00261	0.000496	0.0022
S1_230720299	S3_162180009	0.00973	0.000658	0.00895
S1_230720299	S3_178218077	0.00483	0.000635	0.00534
S1_230720299	S3_216794852	0.00141	0.000505	0.00146
S1_230720299	S3_228551529	0.0014	0.000234	0.00206
S1_230720299	S4_16213189	0.000993	0.000576	0.000963
S1_230720299	S5_204865984	0.00281	0.000377	0.00304
S1_230720299	S8_1650346	0.00773	0.000561	0.00479
S1_230720299	S8_170224601	0.00121	0.000291	0.00344
S1_230720299	S9_146152767	0.0297	0.00043	0.0235
S1_230720299	S9_18914601	0.00914	0.000118	0.00547
S1_23116930	S1_293942416	0.031	0.00074	0.00891
S1_23116930	S1_296662411	0.00463	0.000805	0.00482
S1_23116930	S5_174937204	0.0142	0.000266	0.00993
S1_23116930	S6_165316207	0.000965	8.53e-05	0.000847
S1_23116930	S7_172769301	0.000751	8.89e-05	0.000555
S1_23116930	S7_174220083	0.00619	0.000668	0.00335
S1_23116930	S8_12787788	0.00514	0.000962	0.00384
S1_23116930	S8_170224601	0.000433	2.76e-05	4.38e-05
S1_23116930	S8_170447843	0.000165	1.22e-06	0.000129
S1_23116930	S8_1831170	0.00127	0.000802	0.00123
S1_232528683	S1_258448383	0.0178	9.86e-05	0.0132
S1_232528683	S3_2116890	0.00265	0.000223	0.00227
S1_232528683	S5_168907179	0.00118	1.67e-05	0.000832
S1_232528683	S5_195419440	0.00599	0.000741	0.00391
S1_232528683	S5_210676383	0.0351	0.000792	0.03
S1_232528683	S6_88739645	0.000268	1.02e-05	0.000235
S1_232528683	S7_161902188	0.000362	0.00113	0.000558
S1_232528683	S9_102323942	5.77e-05	9.46e-07	4.01e-05
S1_232654850	S3_210978688	0.0123	0.000267	0.00747
S1_232654850	S5_194560514	0.00197	0.000295	0.00162
S1_232654850	S5_211666978	0.00326	0.000963	0.00251
S1_232654850	S6_167576639	0.00721	0.000147	0.00305
S1_232654850	S8_124288407	0.00588	0.000612	0.0043
S1_233446847	S1_299983398	0.00158	3.22e-05	0.00121
S1_233446847	S2_185691168	0.00304	0.000278	0.0018
S1_233446847	S2_3079555	0.000592	1.28e-05	0.000419
S1_233446847	S3_145787107	0.00162	7.47e-05	0.00145
S1_233446847	S3_1724790	0.0132	0.000386	0.00833
S1_233446847	S3_223172096	0.000564	0.000246	0.000469
S1_233446847	S3_225343099	0.00407	0.000458	0.00296
S1_233446847	S4_174915420	0.00149	4.08e-05	0.00127
S1_233446847	S5_1026096	0.00099	0.000111	0.000456
S1_233446847	S5_214409952	0.00939	0.0008	0.0104
S1_233446847	S6_151455727	0.000217	3.8e-05	0.000231
S1_233446847	S6_156928015	0.011	0.000403	0.0109
S1_233446847	S7_171631629	0.0107	0.000305	0.0085
S1_233446847	S9_2275433	0.00479	0.000144	0.00307
S1_23609916	S5_186725422	0.00876	0.000146	0.00558
S1_23609916	S7_143002114	0.00277	0.000645	0.00264
S1_23609916	S8_170224601	7.04e-06	1.99e-07	1.35e-06
S1_23609916	S8_173243109	0.000517	0.000128	0.000539
S1_236232402	S5_212619269	0.0336	0.000721	0.0296
S1_236232402	S7_124953809	0.000811	0.0041	0.00142
S1_236232402	S7_175278872	0.00405	5.66e-05	0.00308
S1_236951651	S2_4187289	0.0278	0.000793	0.0211
S1_236951651	S3_219197847	0.00035	1.56e-05	0.000305
S1_236951651	S3_229036600	0.00516	0.000991	0.00432
S1_236951651	S4_7010265	0.01	0.000129	0.00697
S1_236951651	S5_3956564	0.00173	2.72e-05	0.00119
S1_236951651	S6_109385665	0.000861	1.01e-05	0.000814
S1_236951651	S6_155656110	0.0124	0.000882	0.0084
S1_236951651	S9_153413532	0.00854	0.000483	0.00736
S1_241001276	S1_276985887	1.08e-05	1.24e-07	6.84e-06
S1_241001276	S1_290309506	0.0091	0.000856	0.00637
S1_241001276	S1_299120420	0.00508	0.0004	0.00321
S1_241001276	S2_10543889	0.0142	0.000559	0.00472
S1_241001276	S2_211521270	0.00233	0.000656	0.00104
S1_241001276	S3_6941062	0.00291	0.000403	0.0031
S1_241001276	S4_174959291	0.00205	5.96e-05	0.00161
S1_241001276	S4_32605546	0.0026	0.000298	0.00201
S1_241001276	S4_6601218	0.00872	0.000107	0.0052
S1_241001276	S5_200435117	0.00081	0.000492	0.000883
S1_241001276	S8_172351221	0.000362	0.000181	0.000392
S1_241001276	S9_145282309	0.00312	0.000106	0.0024
S1_241553453	S1_253905760	0.000989	0.000241	0.000393
S1_241553453	S5_3538509	0.00377	0.000437	0.0024
S1_241553453	S8_139594572	0.0112	0.000585	0.00845
S1_241553453	S9_17667856	0.00861	0.000212	0.00547
S1_24196148	S1_285340252	7.17e-05	9.88e-06	8.48e-05
S1_24196148	S1_43086075	0.00104	0.000692	0.000742
S1_24196148	S3_180510802	0.000166	0.000438	0.000248
S1_24196148	S3_195965766	0.000883	0.00194	0.00145
S1_24196148	S3_4552619	0.00171	0.000906	0.000929
S1_24196148	S4_239420995	0.00723	0.000572	0.00709
S1_24196148	S5_208098757	0.000499	0.000231	0.000391
S1_24196148	S6_166585396	0.0093	0.0009	0.00769
S1_24196148	S7_135815687	0.00227	0.000472	0.00223
S1_24196148	S7_170999731	0.0148	0.000613	0.0102
S1_24196148	S8_170224601	1.72e-05	0.000169	4.87e-05
S1_24196148	S8_1831170	0.00052	0.000412	0.00038
S1_24196148	S9_154247950	0.000269	0.000834	0.000334
S1_246408594	S2_27592229	0.00131	8.97e-05	0.000853
S1_246408594	S5_3641192	0.00583	0.000115	0.00385
S1_246408594	S6_112349494	0.0806	0.000397	0.0322
S1_246408594	S7_156495795	0.000631	0.000257	0.000582
S1_246408594	S7_161902188	0.00132	0.000723	0.00112
S1_246408594	S7_174865970	0.000494	0.000186	0.000626
S1_246816505	S1_273781985	0.00209	0.000879	0.00283
S1_246816505	S2_6973567	1.13e-05	2.53e-06	2.57e-05
S1_246816505	S4_151510025	0.00492	0.000791	0.00703
S1_246816505	S4_21655590	0.00292	0.000359	0.00596
S1_246816505	S5_215625693	0.00334	0.000637	0.00598
S1_246816505	S7_115182500	9.19e-05	0.000102	0.000149
S1_246816505	S9_13171298	0.000386	0.000287	0.000699
S1_246816505	S9_146152767	0.000253	0.000617	0.000325
S1_2469093	S1_293942416	0.0301	0.000421	0.0124
S1_2469093	S1_30571416	0.00081	0.000293	0.00046
S1_2469093	S2_170297810	0.0133	0.000876	0.0112
S1_2469093	S2_232837977	0.019	0.000303	0.00905
S1_2469093	S2_54204647	0.00359	0.000379	0.00267
S1_2469093	S3_23684537	0.000819	0.00019	0.000976
S1_2469093	S4_151510025	0.00339	0.000686	0.0029
S1_2469093	S4_172193066	0.00694	0.000977	0.0047
S1_2469093	S5_203614830	0.00248	0.000549	0.00214
S1_2469093	S5_2704434	0.000311	5.95e-06	0.000297
S1_2469093	S7_133374178	0.000234	0.0667	0.0117
S1_2469093	S9_2620654	0.00138	0.00254	0.000861
S1_248286801	S1_293328637	0.00285	0.000189	0.0037
S1_248286801	S1_54533665	0.0042	0.00061	0.00261
S1_248286801	S2_143485578	0.0285	0.00096	0.019
S1_248286801	S2_232528329	0.00224	0.000137	0.00381
S1_248286801	S3_181687994	0.0014	0.000287	0.00115
S1_248286801	S3_221440469	0.0188	0.000427	0.0156
S1_248286801	S4_238933491	0.0226	0.000858	0.0141
S1_248286801	S4_2409520	0.0197	0.000809	0.0162
S1_248286801	S5_188779691	0.00186	0.000105	0.00139
S1_248286801	S5_206035969	0.000692	0.000119	0.000884
S1_248286801	S6_163434830	0.0304	0.000404	0.00705
S1_248286801	S8_164014001	0.0063	0.00082	0.00223
S1_249319740	S1_299983398	0.00225	0.000447	0.00223
S1_249319740	S2_231338910	0.00116	0.000234	0.00098
S1_249319740	S6_92485700	0.00374	0.00057	0.00318
S1_251079368	S1_295997462	0.0133	0.000703	0.0135
S1_251079368	S2_14545408	0.0119	0.000705	0.00626
S1_251079368	S2_179393601	0.00339	0.00044	0.00334
S1_251079368	S2_222731285	0.000269	0.000121	0.000359
S1_251079368	S2_222807803	0.000665	0.000484	0.000845
S1_251079368	S2_5101600	0.0351	0.000946	0.0332
S1_251079368	S3_187476141	0.000239	2.81e-05	9.65e-05
S1_251079368	S3_30125641	0.000867	3.46e-05	0.000901
S1_251079368	S4_154170741	4.64e-06	0.00016	7.66e-05
S1_251079368	S4_7313082	0.00363	0.000664	0.0039
S1_251079368	S5_212378314	5.63e-05	6.3e-06	4.77e-05
S1_251079368	S6_155392451	0.00754	0.000116	0.00722
S1_251079368	S6_160334467	0.0422	0.000542	0.0114
S1_251079368	S6_167034361	0.00315	0.000876	0.00269
S1_251079368	S7_161951071	0.0378	0.000971	0.022
S1_251079368	S7_175278872	0.00937	0.000136	0.00553
S1_251079368	S7_2915205	0.00283	0.000248	0.0022
S1_251079368	S8_119646326	0.000132	0.000144	0.000206
S1_251079368	S8_20231165	0.0028	8.17e-05	0.00261
S1_251079368	S9_119311982	8.24e-06	5.25e-06	9.67e-06
S1_251079368	S9_147629148	0.000914	0.000434	0.00094
S1_251079368	S9_94179518	0.00169	0.000222	0.00111
S1_251172520	S1_299983398	0.00265	0.000416	0.00179
S1_251172520	S2_226394185	0.0032	9.55e-05	0.0018
S1_251172520	S2_34221773	0.00015	2.36e-06	7.22e-05
S1_251172520	S3_211534125	0.0117	0.000767	0.00977
S1_251172520	S3_221275233	0.00118	1.99e-06	0.00078
S1_251172520	S3_223537211	0.00247	3.21e-05	0.000705
S1_251172520	S3_230255861	0.102	0.000921	0.0679
S1_251172520	S4_234714670	0.00789	0.000278	0.00548
S1_251172520	S4_3048559	0.00108	0.000209	0.00112
S1_251172520	S5_212748793	0.000192	1.54e-05	0.000141
S1_251172520	S5_4945515	0.00382	0.00023	0.00439
S1_251172520	S6_153101499	0.00485	0.00052	0.00525
S1_251172520	S7_161951071	0.00762	0.000445	0.00581
S1_251172520	S8_170359877	0.000238	1.55e-05	0.000171
S1_251172520	S8_171744826	0.00293	0.000385	0.00185
S1_251172520	S9_9357534	0.000765	0.000148	0.000744
S1_251692723	S1_295762691	0.00354	0.000136	0.00369
S1_251692723	S9_9357534	0.00673	0.000428	0.00748
S1_253391071	S2_151827081	0.00222	0.000174	0.002
S1_253391071	S2_236485859	0.0128	0.00019	0.0087
S1_253391071	S3_4552619	0.000847	0.000305	0.000838
S1_253391071	S6_25289085	0.0167	0.000258	0.00985
S1_253391071	S9_13462585	0.00299	0.000209	0.00221
S1_25387691	S1_291889365	0.000614	4.44e-06	0.000592
S1_25387691	S1_79240850	0.012	0.000623	0.00692
S1_25387691	S2_179393601	0.00141	0.000116	0.00219
S1_25387691	S2_187075351	0.000968	0.000126	0.00113
S1_25387691	S2_188901776	0.000368	0.000115	0.000341
S1_25387691	S2_236485850	0.00513	4.87e-05	0.00331
S1_25387691	S3_176333348	0.012	0.000184	0.00999
S1_25387691	S3_178218077	0.00256	0.000247	0.00155
S1_25387691	S3_184269923	0.000739	7.94e-06	0.000349
S1_25387691	S3_225548510	0.0156	0.000938	0.00868
S1_25387691	S3_228551529	0.0201	0.000954	0.0315
S1_25387691	S4_10651579	0.0104	0.000122	0.00543
S1_25387691	S4_227274185	0.0279	0.000626	0.023
S1_25387691	S5_212619269	0.000227	1.98e-05	0.000138
S1_25387691	S5_213747545	0.00241	1.95e-05	0.000702
S1_25387691	S5_3289163	0.000141	4.8e-06	8.31e-05
S1_25387691	S5_8546701	0.002	0.00037	0.00425
S1_25387691	S6_149944232	2.99e-05	7.74e-08	9.99e-06
S1_25387691	S6_155656110	0.00725	0.000646	0.00382
S1_25387691	S6_167576639	0.00619	0.000814	0.00476
S1_25387691	S6_167751036	0.00204	0.000494	0.00343
S1_25387691	S6_9497661	0.0117	0.000889	0.00922
S1_25387691	S7_174506089	0.00631	2.63e-05	0.00226
S1_25387691	S7_174574340	0.000831	0.00196	0.00127
S1_25387691	S8_119646326	0.00022	2.72e-07	0.000171
S1_25387691	S8_154399163	0.000244	6.95e-05	0.000598
S1_25387691	S8_2428521	0.064	0.000526	0.015
S1_25387691	S9_150249043	0.031	0.000475	0.00321
S1_25387691	S9_153188380	0.00549	0.000599	0.00534
S1_25387691	S9_154576594	0.000216	3.55e-05	0.000299
S1_253905760	S1_264953740	0.0098	0.000869	0.00626
S1_253905760	S1_32092189	0.00912	0.000483	0.00708
S1_253905760	S1_3667222	0.000302	0.000299	0.000267
S1_253905760	S2_10543889	0.000907	0.000223	0.000707
S1_253905760	S2_235888860	0.000183	0.000135	0.000139
S1_253905760	S2_41303474	0.0171	0.000503	0.0169
S1_253905760	S2_6191040	0.000217	0.00033	0.000215
S1_253905760	S3_208837596	0.0162	0.000957	0.00296
S1_253905760	S3_230442601	0.00737	0.000341	0.00429
S1_253905760	S4_18587569	0.00372	0.000951	0.00313
S1_253905760	S4_2046599	0.00147	0.00016	0.0011
S1_253905760	S4_239488760	0.00209	0.000654	0.00144
S1_253905760	S5_204866582	0.00329	0.000606	0.00221
S1_253905760	S5_211547778	0.00893	0.000314	0.00513
S1_253905760	S5_2704434	0.00274	0.00037	0.00266
S1_253905760	S6_151126988	0.000576	2.35e-06	0.000227
S1_253905760	S7_159939187	0.00734	0.000466	0.00191
S1_253905760	S8_145847482	0.00189	0.000964	0.00167
S1_253905760	S9_141472971	0.00316	0.000378	0.00208
S1_25414671	S3_171433942	0.00159	0.000121	0.00229
S1_25414671	S4_12083578	0.000925	8.05e-05	0.00034
S1_25414671	S4_231205029	0.000128	1.25e-05	0.000115
S1_25414671	S5_174675337	0.0046	0.000219	0.00474
S1_25414671	S5_204064923	0.00198	7.05e-05	0.0012
S1_25414671	S6_112349494	0.000955	7.5e-05	0.000895
S1_25414671	S6_164893186	4.24e-05	0.000168	0.000108
S1_25414671	S6_165353103	0.00134	9.43e-05	0.000887
S1_25414671	S9_8458872	0.00022	7.7e-06	0.000112
S1_255089284	S1_273096631	0.00892	0.000906	0.0073
S1_255089284	S8_10392707	0.0372	0.000974	0.0316
S1_255089284	S8_127623226	7e-05	4.02e-05	6.21e-05
S1_255089284	S9_119311982	0.00329	0.000988	0.00278
S1_255089284	S9_137873250	0.00102	0.000893	0.00169
S1_256490847	S1_276119307	0.00138	0.000366	0.00131
S1_256490847	S1_37209351	0.00382	0.000611	0.00835
S1_256490847	S1_9956412	0.0182	0.000452	0.0118
S1_256490847	S2_17544291	0.000293	6.56e-05	0.00039
S1_256490847	S2_236413008	0.00183	0.000364	0.00268
S1_256490847	S3_14410570	0.00725	0.000312	0.00436
S1_256490847	S3_146602339	0.00217	1.6e-06	0.000506
S1_256490847	S3_210235070	0.00422	0.000283	0.00256
S1_256490847	S4_166975903	0.033	0.000588	0.0091
S1_256490847	S4_181998835	0.00725	0.000535	0.0134
S1_256490847	S4_237319591	0.00131	0.000107	0.000693
S1_256490847	S4_90676084	0.000313	6.74e-05	0.000346
S1_256490847	S5_183493569	0.000947	8.4e-05	0.000837
S1_256490847	S5_198778102	0.000127	2.08e-05	0.000152
S1_256490847	S5_206604971	0.00136	7.93e-07	0.000575
S1_256490847	S5_213524444	0.01	0.0008	0.00516
S1_256490847	S5_214710680	0.00287	0.000727	0.00639
S1_256490847	S5_215301129	0.00402	9.72e-05	0.00417
S1_256490847	S5_215560550	0.000385	1.51e-05	0.000217
S1_256490847	S5_9651660	0.005	0.000943	0.00666
S1_256490847	S6_156522456	0.00033	3.38e-05	0.000517
S1_256490847	S6_41796789	0.0266	0.000586	0.02
S1_256490847	S6_92485700	9.16e-06	2.7e-08	1.72e-05
S1_256490847	S7_131445903	0.00481	5.89e-05	0.0026
S1_256490847	S7_132629901	0.000238	9.23e-05	0.00017
S1_256490847	S7_168388048	0.00169	7.49e-05	0.00208
S1_256490847	S7_172163467	0.0144	0.000996	0.0111
S1_256490847	S7_172768026	0.00142	0.000254	0.00385
S1_256490847	S7_174512526	0.00129	0.000235	0.00145
S1_256490847	S7_32676	0.00236	4.62e-06	0.000408
S1_256490847	S8_124837372	0.000229	1.39e-05	0.000166
S1_256490847	S8_148504671	0.00366	0.000435	0.00246
S1_256490847	S8_165282631	0.000939	0.000419	0.00199
S1_256490847	S8_168828093	0.000529	0.000251	0.000666
S1_256490847	S8_4619629	9.42e-05	2.89e-05	6.03e-05
S1_256490847	S9_146152767	0.00732	0.000734	0.0057
S1_256513834	S1_276985887	0.00308	0.000397	0.00518
S1_256513834	S2_10535246	0.0243	0.000719	0.0177
S1_256513834	S2_217406209	0.0119	0.00038	0.00969
S1_256513834	S4_171788276	0.000373	0.000137	0.000434
S1_256513834	S8_173509618	0.00113	8.85e-06	0.000484
S1_256513834	S9_149552629	0.00131	0.000411	0.00202
S1_258448383	S4_10651579	0.00251	0.000372	0.00202
S1_258448383	S8_171710236	0.00827	0.000391	0.00795
S1_258875029	S4_181890725	0.00464	0.000251	0.00149
S1_258875029	S4_1983633	0.00346	1.3e-05	0.00289
S1_258875029	S5_163411721	0.001	0.000132	0.000993
S1_258875029	S8_119646326	0.0176	0.000325	0.0147
S1_258875029	S8_131799167	0.000595	3.5e-05	0.000347
S1_259930666	S1_269304434	0.00273	8.47e-05	0.00254
S1_259930666	S1_298413436	0.0236	0.000984	0.0286
S1_259930666	S2_228979822	0.0039	0.000535	0.00394
S1_259930666	S2_232405635	0.00219	0.000322	0.00188
S1_259930666	S5_1026096	0.000836	0.000883	0.00078
S1_259930666	S5_8336164	0.00117	0.000749	0.000809
S1_259930666	S6_153267963	0.00727	0.000378	0.00618
S1_259930666	S8_173243109	0.000102	0.000151	0.000127
S1_260134138	S1_9437011	0.00132	0.000584	0.000988
S1_260134138	S2_194157080	0.00595	0.000399	0.00234
S1_260134138	S3_64819409	0.00614	0.000354	0.00473
S1_260134138	S5_13052861	0.00155	0.000211	0.00248
S1_260134138	S5_179928953	0.000236	0.000298	0.000322
S1_260134138	S5_2360606	0.00186	9.07e-05	0.00121
S1_260134138	S6_105408548	0.000592	0.000249	0.0015
S1_260134138	S8_159899447	0.0279	0.000934	0.0157
S1_260134138	S8_168482318	0.0316	5.78e-05	0.009
S1_260134138	S9_135888196	0.0223	0.000546	0.0102
S1_260134138	S9_138887157	0.014	7.2e-05	0.00482
S1_260655667	S1_287704884	0.00296	0.000148	0.00324
S1_260655667	S4_2381967	0.0125	0.000284	0.0113
S1_260655667	S6_95327369	0.0297	0.00036	0.0173
S1_260655667	S9_130919657	0.00788	0.000836	0.00573
S1_262501900	S1_79753802	0.0278	0.000492	0.0207
S1_262501900	S4_169960071	0.00272	5.31e-05	0.00266
S1_262501900	S4_178672969	0.002	0.000972	0.00259
S1_262501900	S5_163411721	0.0146	0.000881	0.00768
S1_262501900	S5_215471810	0.00811	0.000526	0.00609
S1_262501900	S6_97340097	0.000172	2.12e-05	0.000151
S1_262501900	S7_14609044	0.0142	0.000506	0.00908
S1_262513988	S1_295349423	0.00934	0.00031	0.00832
S1_262513988	S3_230442601	0.0132	0.000437	0.0104
S1_262513988	S4_196467103	0.000959	0.000201	0.000756
S1_262513988	S4_236171246	0.0126	0.000967	0.00744
S1_262513988	S5_205285315	0.00152	0.000111	0.00125
S1_262513988	S5_5792479	0.00429	0.000412	0.00325
S1_262513988	S6_155650795	0.0116	0.000631	0.00737
S1_262513988	S7_160595487	0.00355	0.00093	0.00357
S1_262513988	S7_162668459	0.00034	4.59e-05	0.000269
S1_262937140	S9_142051997	0.00162	0.000176	0.0016
S1_263733899	S5_211731222	0.0194	0.000451	0.0101
S1_263733899	S6_86257580	0.000818	0.00253	0.00107
S1_263733899	S8_165142649	0.00274	0.000941	0.00304
S1_264164784	S1_293930177	0.00209	0.000405	0.00281
S1_264164784	S2_224343513	0.0019	0.000387	0.00155
S1_264164784	S3_157085834	0.000849	0.000335	0.000796
S1_264164784	S3_225137577	0.00012	4.92e-05	4.98e-05
S1_264164784	S3_230179656	0.0102	2.75e-05	0.00126
S1_264164784	S5_174675337	0.00399	3.99e-05	0.00232
S1_264164784	S6_86476174	0.00703	0.000853	0.00782
S1_264164784	S7_174506089	0.000559	0.0013	0.0008
S1_264164784	S7_27978520	0.000933	0.000289	0.00108
S1_264164784	S9_5319930	0.00071	3.25e-05	0.000167
S1_264164784	S9_5994538	0.00269	0.000535	0.00312
S1_264953740	S1_293944923	6.24e-06	2.54e-07	9.78e-06
S1_264953740	S1_30042828	0.00081	0.000367	0.000244
S1_264953740	S2_11060399	9.55e-05	1.07e-05	8.14e-05
S1_264953740	S2_151827081	0.000217	3.58e-05	0.000193
S1_264953740	S2_188901776	0.00234	0.000774	0.00425
S1_264953740	S2_211792433	0.000108	6.9e-07	9.47e-05
S1_264953740	S2_21791455	0.00585	0.000616	0.00243
S1_264953740	S2_22756457	0.00277	0.000749	0.00163
S1_264953740	S3_157570069	1.36e-06	1.19e-05	8.68e-06
S1_264953740	S3_222950004	0.000223	0.00022	0.000171
S1_264953740	S3_227050324	1.87e-05	2.68e-06	2.56e-05
S1_264953740	S4_16213189	0.000161	5.57e-06	5.23e-06
S1_264953740	S4_171126551	0.000112	0.00015	3.67e-05
S1_264953740	S4_174012093	0.000732	0.00106	0.000631
S1_264953740	S4_2409520	0.0771	0.000519	0.0237
S1_264953740	S4_7010265	0.00502	9.51e-05	0.00605
S1_264953740	S5_212378314	0.00248	5.01e-05	0.0024
S1_264953740	S5_215226581	0.00126	0.0011	0.000931
S1_264953740	S6_160037746	4.06e-05	7.64e-06	4.31e-05
S1_264953740	S6_162568664	6.87e-05	0.000197	6.67e-05
S1_264953740	S6_88592723	0.00311	0.000214	0.00152
S1_264953740	S7_132629901	0.00156	0.00078	0.00293
S1_264953740	S7_162340878	0.0138	0.000976	0.00748
S1_264953740	S7_165384608	1.15e-06	1.04e-09	7e-07
S1_264953740	S7_173525965	0.00295	0.000128	0.00413
S1_264953740	S7_2915205	9.47e-06	5.3e-05	1.6e-05
S1_264953740	S8_164014001	0.000524	0.000579	0.00115
S1_264953740	S8_170224601	0.000518	0.000233	0.00471
S1_264953740	S8_17061005	0.000192	2.36e-05	0.000113
S1_264953740	S8_3240838	0.00793	0.000519	0.00419
S1_264953740	S9_130919657	0.0057	0.000711	0.00725
S1_264953740	S9_13462585	0.00218	8.71e-05	0.000697
S1_264953740	S9_144376310	0.0029	5.78e-05	0.00132
S1_264953740	S9_149246655	0.000284	0.00652	0.000735
S1_264953740	S9_150249043	0.000461	0.0004	0.000877
S1_264953740	S9_28846511	0.0013	0.000875	0.00211
S1_265169401	S1_270031325	0.0116	0.000453	0.0122
S1_265169401	S1_37209351	0.0935	0.000327	0.06
S1_265169401	S1_72842640	0.00928	0.0008	0.00766
S1_265169401	S2_187075351	0.0134	0.000943	0.0129
S1_265169401	S2_229287384	0.00194	0.000242	0.00187
S1_265169401	S2_232597945	1.16e-05	3.06e-07	3.25e-06
S1_265169401	S4_5406529	0.0168	0.00097	0.014
S1_265169401	S5_187572309	0.000687	4.6e-05	0.000516
S1_265169401	S6_144852885	0.000245	7.02e-05	0.000289
S1_265169401	S6_162482424	0.00428	0.000319	0.00302
S1_265169401	S7_28361010	0.0376	0.000528	0.0226
S1_265169401	S9_4224035	0.000769	0.00462	0.00132
S1_267783859	S1_8430345	0.0011	0.000314	0.000932
S1_267783859	S1_8623369	0.00827	0.000956	0.00636
S1_267783859	S2_2493148	0.00841	0.000867	0.0056
S1_267783859	S3_222483156	0.00254	0.000229	0.00203
S1_267783859	S4_234499424	0.0048	0.000258	0.0033
S1_267783859	S5_5380290	0.00181	6.29e-05	0.00122
S1_267783859	S7_2888491	0.00776	0.000209	0.00525
S1_267783859	S8_168482318	0.0197	0.000665	0.0151
S1_267956655	S1_274479507	0.0249	0.000797	0.0259
S1_267956655	S1_29196662	0.00405	0.000228	0.00492
S1_267956655	S4_234572467	0.000445	0.000125	0.00066
S1_267956655	S5_182250063	4.34e-06	2.81e-06	8.88e-06
S1_268308762	S1_290201011	0.0137	0.00091	0.0133
S1_268308762	S1_293942416	0.00287	0.000423	0.00889
S1_268308762	S1_297608050	0.00528	0.000502	0.00406
S1_268308762	S1_7162859	0.00143	0.000101	0.00105
S1_268308762	S2_232597945	0.00526	0.000924	0.0039
S1_268308762	S2_6338854	0.000506	0.000207	0.000677
S1_268308762	S3_219185438	0.0121	0.000154	0.00922
S1_268308762	S5_164771433	0.000808	0.000866	0.00113
S1_268308762	S5_205235001	0.00416	1.95e-05	0.0034
S1_268308762	S5_27099261	0.000781	0.000138	0.0007
S1_268308762	S6_166182660	0.00302	5.76e-05	0.00235
S1_268308762	S6_167576639	0.000394	0.00033	0.000671
S1_268308762	S7_133374178	0.000615	0.000111	0.0018
S1_268308762	S7_141586596	0.00015	3e-06	0.000124
S1_268308762	S7_167853871	0.00426	0.0007	0.00546
S1_268308762	S7_172670170	0.000777	0.000434	0.00061
S1_268308762	S7_172768026	0.000202	6.75e-05	0.000193
S1_268308762	S8_170224601	0.000118	2.97e-05	0.000263
S1_268308762	S8_1831170	0.00107	0.00015	0.000677
S1_268308762	S9_152205264	0.000756	0.000545	0.000806
S1_268308762	S9_17446280	0.00328	0.000845	0.00362
S1_268430905	S1_286510408	0.00362	0.000212	0.00295
S1_268430905	S2_225531603	0.00471	0.000277	0.00373
S1_268430905	S2_3079555	0.00654	0.000811	0.00628
S1_268430905	S3_223172096	0.00276	0.000343	0.00211
S1_268430905	S6_109385665	0.000186	0.000434	0.000354
S1_268430905	S7_143002114	0.0008	0.00106	0.000658
S1_269304434	S2_222220011	0.0029	0.000215	0.00201
S1_269304434	S2_6191040	8.5e-05	4.61e-06	5.8e-05
S1_269304434	S3_226417605	0.000215	9.87e-06	0.000163
S1_269304434	S4_191320134	0.00122	4.92e-05	0.000705
S1_269304434	S5_142722810	0.00752	0.000339	0.00571
S1_269304434	S6_153267963	0.0021	0.000727	0.00155
S1_269304434	S7_166667048	0.00333	0.000873	0.00363
S1_269304434	S7_170244218	0.00505	0.000435	0.00286
S1_269304434	S8_168074363	0.000436	6.53e-05	0.000401
S1_269304434	S9_13462585	0.00809	0.000156	0.00474
S1_269304434	S9_153413532	0.00362	0.000331	0.00305
S1_269304434	S9_154576594	0.000486	0.000118	0.000443
S1_270031325	S1_296189841	0.00435	0.00071	0.00211
S1_270031325	S1_56978233	0.00442	0.000107	0.0029
S1_270031325	S2_3079555	0.000975	0.000122	0.00087
S1_270031325	S3_187476141	0.000289	5.65e-05	0.000274
S1_270031325	S4_236371137	0.00359	0.000531	0.00283
S1_270031325	S5_190476896	0.0252	0.000688	0.0222
S1_270031325	S5_206035969	0.000808	0.000229	0.000573
S1_270031325	S9_2275433	0.00335	0.000549	0.00217
S1_2727739	S1_293577771	0.0159	0.000258	0.0111
S1_2727739	S3_93312427	0.00289	0.000104	0.00367
S1_2727739	S6_144852885	0.00107	0.000232	0.0014
S1_2727739	S6_167576639	0.00225	0.00036	0.0019
S1_2727739	S9_135834777	0.0322	0.000746	0.0295
S1_2727739	S9_152205264	0.0198	7.94e-05	0.00833
S1_272839586	S4_174012093	0.00283	0.000467	0.00203
S1_272839586	S4_238435996	0.00169	0.000764	0.00388
S1_272839586	S6_162742880	0.000353	0.000176	0.000362
S1_272839586	S7_159939187	0.0116	0.000325	0.0113
S1_272839586	S8_164741115	0.00668	0.000862	0.00681
S1_272839586	S9_9357534	0.00161	5.2e-05	0.00136
S1_273096631	S1_290109337	0.00304	0.000873	0.0022
S1_273096631	S3_208837596	0.00336	0.000617	0.00497
S1_273096631	S6_147911255	0.00245	0.000702	0.00257
S1_273096631	S6_159404959	0.00198	0.000863	0.00268
S1_273096631	S7_124953809	0.00821	6.95e-05	0.00579
S1_273096631	S7_170621064	0.00244	0.000292	0.00194
S1_273096631	S7_2583141	0.00109	5.33e-05	0.00103
S1_273096631	S8_157407263	0.00058	0.000105	0.000498
S1_273352945	S1_95486622	0.00574	0.00018	0.00506
S1_273352945	S2_18210382	0.0166	0.000522	0.0112
S1_273352945	S2_7411524	0.00142	1.84e-05	0.00102
S1_273352945	S5_4201364	0.00189	0.000244	0.000865
S1_273352945	S6_109385665	0.00419	0.000786	0.00557
S1_273352945	S7_14911515	0.00256	8.49e-05	0.00175
S1_273352945	S9_144531671	0.000762	0.00106	0.000824
S1_273696896	S1_28072015	0.00246	0.000853	0.00268
S1_273696896	S1_281908482	0.00306	0.000216	0.00728
S1_273696896	S1_286360060	0.000313	4.32e-05	0.000819
S1_273696896	S1_290201011	0.000856	1.36e-05	0.000709
S1_273696896	S1_292340955	0.0181	0.000501	0.0154
S1_273696896	S2_11060399	0.000292	7.64e-05	0.00028
S1_273696896	S2_186639833	0.000154	1.63e-05	0.000136
S1_273696896	S2_236290868	0.00108	0.000335	0.000779
S1_273696896	S2_84653975	0.00111	3.06e-05	0.000863
S1_273696896	S3_223537211	0.00145	0.000627	0.0029
S1_273696896	S3_225548510	0.000467	0.000128	0.000361
S1_273696896	S3_228551529	0.000319	0.000432	0.000873
S1_273696896	S4_174915420	0.00862	0.000443	0.00752
S1_273696896	S4_180623850	3.45e-06	2.23e-06	2.5e-06
S1_273696896	S4_236371137	0.000623	0.000768	0.000717
S1_273696896	S4_237953848	0.0026	0.000982	0.00298
S1_273696896	S4_2409520	0.00626	0.000397	0.00791
S1_273696896	S4_7010265	0.00605	0.000279	0.00402
S1_273696896	S4_9850539	0.00485	0.000278	0.00407
S1_273696896	S5_12275688	0.000496	0.00019	0.000595
S1_273696896	S5_174675337	0.017	0.000153	0.0108
S1_273696896	S5_210676383	0.00251	0.000193	0.00351
S1_273696896	S5_210867065	0.000815	0.00039	0.000994
S1_273696896	S5_215931592	0.00393	0.000856	0.00296
S1_273696896	S5_215991184	0.00207	5.14e-05	0.00218
S1_273696896	S5_32000019	0.00357	2.77e-05	0.00267
S1_273696896	S5_3956564	1.63e-05	1.53e-05	2.68e-05
S1_273696896	S6_109385665	0.00253	0.000794	0.00846
S1_273696896	S6_156522456	0.000253	8.08e-06	0.000133
S1_273696896	S6_160037746	0.00182	0.000521	0.00197
S1_273696896	S6_34927394	0.00279	0.000461	0.00147
S1_273696896	S7_143002114	0.000193	0.000139	7.17e-05
S1_273696896	S7_172769301	0.00401	0.000323	0.00421
S1_273696896	S7_174574340	0.00029	5.83e-05	0.000328
S1_273696896	S8_21699903	0.000342	3.28e-05	0.000109
S1_273696896	S8_834072	0.00195	0.000909	0.00142
S1_273696896	S9_144531671	0.0102	0.000671	0.00465
S1_273696896	S9_147965995	0.00525	0.000322	0.00501
S1_273696896	S9_154247950	1.83e-05	2.21e-05	4.24e-05
S1_273696896	S9_4652527	0.00593	4.62e-05	0.00538
S1_273781985	S1_28072015	0.00429	0.000974	0.00351
S1_273781985	S1_293930177	0.00516	0.00082	0.00529
S1_273781985	S1_293942416	0.0409	0.000786	0.0171
S1_273781985	S1_299120420	0.00661	0.000431	0.00781
S1_273781985	S2_174681656	0.0057	0.00014	0.0039
S1_273781985	S2_210963094	0.00224	7.25e-05	0.00199
S1_273781985	S2_7411524	0.00838	0.000206	0.0063
S1_273781985	S3_229036600	0.00727	0.000913	0.00609
S1_273781985	S4_224911596	0.000645	2.63e-05	0.000238
S1_273781985	S4_234714670	0.000353	0.000462	0.000569
S1_273781985	S5_204866582	0.026	0.000671	0.0207
S1_273781985	S5_210492550	0.0322	0.000727	0.0271
S1_273781985	S5_214431458	0.000505	2.13e-05	0.000269
S1_273781985	S6_103132043	0.0377	0.000241	0.0159
S1_273781985	S7_32676	0.00954	0.0002	0.00502
S1_273781985	S8_145847482	0.000485	1.38e-05	0.000363
S1_273781985	S9_60954290	0.025	0.000313	0.0146
S1_274479507	S2_44719287	0.005	0.000571	0.00441
[truncated: 6,483 more rows]

## Sheet: 02.Rice
SNP01	SNP02	REMMA	Q+K	Q+2K
dd1000104	id10004273	0.00175	0.000713	0.00351
dd1000104	id1003423	0.000742	0.000311	0.000478
dd1000104	id2016436	0.000151	0.000353	0.00125
dd1000104	id8002862	0.000756	0.00713	0.0159
dd1000104	id8003172	0.000816	0.0023	0.0033
dd1000104	ud7001208	7.34e-05	0.000549	0.00161
dd1000173	id10003056	0.00165	0.000926	0.00256
dd1000173	id2008517	0.0457	0.000204	0.000642
dd1000173	id3011075	0.00105	0.000477	0.00335
dd1000173	id4000767	2.15e-05	4.75e-05	8.96e-05
dd1000173	id7000106	0.00157	0.000757	0.00147
dd1000173	ud2001743	0.000147	0.00178	0.00147
dd1000313	id1027642	0.000566	0.000458	0.000718
dd1000313	id4001524	0.00083	0.000896	0.00215
dd1000313	id7002869	0.000951	0.00028	0.0017
dd1000564	dd3000624	0.000145	3.49e-05	0.000288
dd1000564	id11001494	0.000123	0.000428	0.000305
dd1000564	id11004731	0.000225	0.000436	0.000928
dd1000564	id2008517	0.000198	0.000674	0.000805
dd1000564	id2016162	0.000675	0.00616	0.00862
dd1000564	id3014722	2.39e-05	8.39e-05	0.000154
dd1000564	id4009950	0.000955	0.00151	0.0026
dd1000564	ud6000233	0.000673	0.00244	0.00363
dd1000646	id4006805	0.00108	0.000747	0.00289
dd1000646	id5006409	0.0024	0.000105	0.000226
dd1000646	id6016824	0.00121	0.000943	0.00355
dd1000814	id2003033	1.23e-05	1.24e-05	2.34e-05
dd1000814	id2009218	0.00119	0.00083	0.00177
dd1000814	id4004005	0.000781	0.000458	0.00137
dd1001208	dd1002045	0.000713	1	1
dd1001317	id1014808	0.000445	0.000516	0.00119
dd1001317	id11010816	0.001	0.0005	0.00249
dd1001336	id4005074	0.000513	0.00173	0.00148
dd1001623	id1012442	0.00179	0.000668	0.00391
dd1001623	id2005051	0.000359	0.00019	0.000276
dd1001623	id2016162	0.00557	0.000181	0.000319
dd1001623	ud12000265	0.000788	0.000915	0.00197
dd1001726	dd11001243	0.000808	0.000487	0.00225
dd1001998	id4005332	0.000836	0.000927	0.00155
dd1001998	ud5000331	0.000213	3.01e-05	0.000125
dd1001998	ud5000664	0.000193	4.94e-05	0.00036
dd1002045	id1004990	0.00054	1	1
dd1002045	id1028554	0.000321	1	1
dd1002045	id11002767	0.000826	1	1
dd1002045	id12000389	0.00046	1	1
dd1002045	id2003226	0.000834	1	1
dd1002045	id2010160	0.000483	1	1
dd1002045	id3007092	0.000199	1	1
dd1002045	id8002862	0.000338	1	1
dd1002210	id10001727	0.00236	0.000711	0.00362
dd1002210	id6011452	0.00209	0.000455	0.00279
dd1002220	id1027642	7.43e-05	2.65e-05	7.24e-05
dd1002220	id12004584	0.000944	0.000423	0.000785
dd1002220	id2008517	0.0127	0.000652	0.00151
dd1002222	id12002092	0.00263	0.000654	0.00357
dd1002488	id11005463	8.19e-05	5.08e-05	8.7e-05
dd1002576	id1011487	0.00069	0.000539	0.000858
dd1002576	id11011499	0.000522	0.000407	0.00108
dd1002576	id3012562	0.000845	0.000201	0.00189
dd1002576	id4011628	0.0126	0.000516	0.00101
dd1002576	id7004665	0.000638	0.000159	0.00137
dd1002576	id8001041	0.000313	0.000329	0.000915
dd1002576	id8004698	0.000287	0.000113	0.00118
dd1002576	id8006944	0.00192	0.000871	0.00498
dd1002576	ud2001743	0.000119	0.000377	0.00058
dd1002587	id2012923	0.00168	0.000752	0.00285
dd1002587	id8002106	0.00204	0.000877	0.00257
dd1002716	id3013825	0.00082	0.00291	0.00462
dd1002716	id8002862	0.000129	0.000857	0.00508
dd1002894	id2010734	0.000465	0.000419	0.000564
dd1002894	id8004698	6.46e-05	5.33e-05	5.78e-05
dd1002894	ud5000835	0.000151	3.34e-05	0.000167
dd11000134	id1019512	0.000507	0.000692	0.000896
dd11000134	id11010872	0.0011	0.000595	0.00145
dd11000134	id3011687	0.00136	0.000799	0.00168
dd11000134	id6011361	0.000807	0.00109	0.000936
dd11000134	id7002169	0.000715	0.000693	0.00218
dd11000245	id8002251	0.00139	0.000584	0.0011
dd11000257	dd11000923	0.000105	8.85e-05	0.000177
dd11000257	id10006304	0.000206	0.000477	0.00175
dd11000257	id1007855	0.00695	0.000808	0.000577
dd11000257	id11000314	0.000214	0.00157	0.00354
dd11000257	id11001716	2.52e-05	3.3e-05	0.000265
dd11000257	id12006261	0.000713	0.00175	0.00174
dd11000257	id12010106	0.000547	0.000129	0.000216
dd11000257	id2008517	0.000358	0.00875	0.00931
dd11000257	id4000767	0.000636	0.000622	0.00104
dd11000257	id8001041	3.35e-05	0.000212	0.000302
dd11000257	id8001212	9.34e-05	0.000999	0.000533
dd11000257	id9004722	0.000119	0.000567	0.00188
dd11000337	id2010375	0.00063	0.000384	0.001
dd11000337	id4000980	0.000484	0.000295	0.000518
dd11000337	id6011452	0.00111	0.00107	0.000955
dd11000345	dd3000624	0.000127	2.28e-05	0.000277
dd11000345	id11004731	0.00126	0.000838	0.0019
dd11000345	id11008538	0.000112	5.66e-05	0.00033
dd11000345	id12007063	0.00044	0.000205	0.000829
dd11000345	id2005051	0.000138	0.000113	0.00114
dd11000345	id3012392	0.00243	0.000762	0.00362
dd11000356	id3017313	0.000368	0.00026	0.000844
dd11000356	id4005225	0.000367	0.000247	0.000732
dd11000356	id6003420	0.000766	0.00287	0.00307
dd11000356	id8004698	0.000795	0.000427	0.000814
dd11000356	id8006959	3.32e-05	1.89e-05	7.61e-05
dd11000356	ud5000835	0.000209	0.000108	0.000601
dd11000356	ud9001252	0.00456	0.000776	0.00344
dd11000356	wd4002612	0.0015	0.000826	0.00311
dd11000358	dd11000923	0.012	0.000247	0.000864
dd11000358	id1000956	0.000915	0.00187	0.00258
dd11000358	id5007974	9.84e-05	0.000282	0.00077
dd11000387	id10006132	0.000729	0.000145	0.000417
dd11000387	id12007063	0.00306	0.000721	0.00455
dd11000387	id12009769	0.00216	0.000955	0.00312
dd11000387	id12010106	0.000655	0.000762	0.00121
dd11000387	id6004445	0.000716	0.000263	0.000855
dd11000387	id6016667	0.000232	0.000119	0.000415
dd11000387	id8000610	0.00311	0.000795	0.00354
dd11000387	id8004698	0.000187	0.000123	0.000226
dd11000458	dd11000489	0.000416	0.00175	0.00348
dd11000458	id1008856	0.00224	0.000759	0.00257
dd11000458	id11002137	0.00227	0.000328	0.00123
dd11000458	id11008772	0.000651	0.00189	0.0043
dd11000458	id11008973	0.0176	0.000236	0.00139
dd11000458	id12000121	0.000504	0.000983	0.00345
dd11000458	id2007519	0.000746	0.00372	0.00473
dd11000458	id5004628	0.0352	0.000283	0.00115
dd11000458	id6005092	0.00686	0.000897	0.00274
dd11000458	id8001738	0.000983	0.0102	0.0108
dd11000458	ud5000664	0.00015	0.000132	0.00073
dd11000489	id1014178	0.000338	0.000327	0.000645
dd11000489	id6002930	0.000948	0.00141	0.00293
dd11000489	id9004722	0.000903	0.00387	0.00539
dd11000491	id8005215	0.000544	0.000618	0.0022
dd11000502	id4001872	0.000651	0.000659	0.000937
dd11000546	id10004944	0.000657	0.000499	0.00116
dd11000546	id11006164	0.00146	0.000266	0.0021
dd11000546	id2004977	0.000146	0.00297	0.00117
dd11000862	id10000617	0.000991	0.00143	0.00306
dd11000862	id11010409	0.00043	0.000111	0.000339
dd11000862	id3005190	0.000931	0.000946	0.00152
dd11000862	id3007406	0.000755	0.000276	0.00053
dd11000862	ud5000957	0.0013	0.000972	0.00251
dd11000872	id1005408	0.000478	0.000332	0.000883
dd11000923	dd11001103	9.39e-05	0.000116	0.000211
dd11000923	id10001466	0.0129	0.000886	0.00185
dd11000923	id10003276	0.00201	0.000856	0.00209
dd11000923	id10006910	0.00688	0.000887	0.00286
dd11000923	id1002845	0.000129	9.88e-05	0.000185
dd11000923	id1012902	0.000136	0.000312	0.000513
dd11000923	id1013489	0.00303	0.000774	0.00134
dd11000923	id1027642	2.95e-05	4.57e-05	6.9e-05
dd11000923	id11000314	9.95e-05	0.000146	0.000275
dd11000923	id11004731	0.000467	0.000845	0.00109
dd11000923	id11009726	3.4e-05	3.9e-05	6.56e-05
dd11000923	id12002574	0.00034	0.000374	0.000937
dd11000923	id12006821	0.00038	0.000138	0.000711
dd11000923	id12008082	0.00555	0.000836	0.00202
dd11000923	id2002653	3.03e-05	3.81e-05	5.9e-05
dd11000923	id2007554	0.000516	0.00104	0.000999
dd11000923	id2009538	0.000955	0.00127	0.0013
dd11000923	id3005190	0.00291	0.000812	0.00144
dd11000923	id3011074	0.000887	0.00142	0.00117
dd11000923	id3018576	0.000199	0.000214	0.000411
dd11000923	id4001872	0.00341	0.000957	0.00243
dd11000923	id4006805	0.000989	0.00133	0.00107
dd11000923	id4010985	0.000252	0.000123	0.000452
dd11000923	id5007974	0.000108	0.000336	0.000673
dd11000923	id5013951	0.000106	8.77e-05	0.000309
dd11000923	id6004663	0.000113	0.000354	0.000273
dd11000923	id6006538	0.00327	0.000541	0.00202
dd11000923	id6008960	0.0167	0.000817	0.00375
dd11000923	id6011727	9.05e-06	2.16e-05	3.05e-05
dd11000923	id6014700	0.00124	0.00143	0.00082
dd11000923	id7001680	5.88e-05	7.74e-05	0.000117
dd11000923	id7003207	0.000372	0.000126	0.000525
dd11000923	id9001039	0.00024	0.000429	0.000627
dd11000923	id9001600	0.0008	0.000485	0.000399
dd11000923	id9002707	5.17e-05	8.29e-05	0.000203
dd11000923	id9003436	0.0213	0.000981	0.00232
dd11000923	ud5000835	2.68e-05	3.03e-05	4.51e-05
dd11000923	ud9000881	0.000259	0.000382	0.00117
dd11000923	wd1000197	0.000123	8.58e-05	0.000203
dd11000923	wd4002612	0.00692	0.000737	0.00142
dd11000923	wd7002954	0.0104	0.000162	0.000598
dd11000972	id1001069	0.000653	0.000472	0.000802
dd11000972	id11009966	0.00027	0.000817	0.000472
dd11000972	id8001958	0.000169	0.000118	0.000375
dd11000972	id8007977	0.0005	0.0016	0.000982
dd11000972	id9004722	0.000789	0.0038	0.0024
dd11000972	ud6000233	0.00019	0.00213	0.00328
dd11000973	id3009463	8.59e-06	1.92e-05	4.83e-05
dd11001073	id10003812	0.00104	0.000872	0.000878
dd11001073	id1003851	0.00177	0.000496	0.00315
dd11001073	id11008538	2.67e-05	8.88e-06	0.000136
dd11001073	id2010240	0.00135	0.000983	0.00142
dd11001073	id6010126	0.0019	0.000767	0.00208
dd11001073	id8004698	0.00835	0.00019	0.000397
dd11001073	id8006944	0.00353	0.000145	0.000916
dd11001073	id9004722	0.000729	0.00104	0.00397
dd11001103	id11009197	0.000216	0.000411	0.000179
dd11001103	id12000006	0.000579	0.000395	0.000702
dd11001103	id2008517	0.00122	0.00131	0.000916
dd11001103	id3001101	0.000798	0.000549	0.00145
dd11001103	id4010253	0.000122	0.000192	0.000171
dd11001103	id5000010	0.000314	0.00135	0.000821
dd11001103	id6001333	0.00092	0.000851	0.00201
dd11001103	id6011710	0.000236	0.000136	0.000227
dd11001103	id6011727	4.59e-05	6.12e-05	7.48e-05
dd11001103	id6016824	0.00193	0.000986	0.00057
dd11001103	id8002284	0.000203	0.000288	0.000139
dd11001103	id9001600	6.02e-05	3.88e-05	0.000109
dd11001157	id1005908	0.000802	0.000906	0.00158
dd11001157	id8005609	0.000282	0.00011	0.000797
dd11001157	ud12000518	0.000224	0.000177	0.00075
dd11001161	id11010822	0.000685	0.000305	0.00117
dd11001161	id8004698	0.000592	4.02e-05	5.99e-05
dd11001161	ud3000719	0.0135	0.00082	0.0016
dd11001243	id7002801	9.36e-05	1.21e-05	9.14e-05
dd3000077	id5007113	0.000813	0.0025	0.00341
dd3000115	id9001850	0.000264	0.000214	0.000209
dd3000213	id11007232	0.000526	0.000568	0.00165
dd3000591	id10006304	0.00071	0.000762	0.00246
dd3000591	id11002781	0.000158	0.000294	0.000631
dd3000591	id11009565	0.00125	0.000742	0.00263
dd3000591	id12010106	0.000811	0.000363	0.000502
dd3000591	id2000917	0.00167	0.000923	0.00254
dd3000591	id3012622	0.00126	0.000906	0.00211
dd3000591	id4004183	0.00101	0.000776	0.00174
dd3000591	id8006944	0.000266	0.000222	0.000544
dd3000591	ud2001743	0.000521	0.000388	0.00166
dd3000624	id10000617	0.000902	0.000502	0.00141
dd3000624	id10006132	0.000164	5.25e-05	0.00055
dd3000624	id12000389	0.000338	0.000454	0.000559
dd3000624	id12003626	0.00137	0.000908	0.0026
dd3000624	id12010106	0.00523	0.000511	0.00107
dd3000624	id2007218	0.000512	0.000486	0.000516
dd3000624	id2010240	0.000762	0.000526	0.00111
dd3000624	id2010974	0.00217	0.000955	0.00265
dd3000624	id4005074	0.00096	0.000374	0.000777
dd3000624	ud2001743	0.000112	0.00105	0.00505
dd3000624	wd2002230	0.000744	0.000924	0.00224
dd3001143	id1004870	0.00209	0.000891	0.00371
dd3001143	id5003119	0.000411	0.00107	0.000637
dd3001143	id8006944	0.00129	0.000716	0.00293
dd3001143	ud2001743	4.53e-05	0.00106	0.00281
fd8	id2016162	0.000838	0.00506	0.00959
fd8	id8001248	0.00185	0.000696	0.00161
id10000158	ud8001060	0.00155	0.000838	0.00236
id10000273	ud10000231	0.000869	0.00116	0.00117
id1000027	id1005815	0.000907	0.000779	0.00116
id1000027	id1015550	0.000196	0.000158	0.000472
id1000027	id12002743	0.000636	0.000216	0.00103
id1000027	id3002556	0.00318	0.000899	0.00309
id1000027	id7000897	0.000497	0.000768	0.00157
id1000027	id8000011	0.00468	0.000345	0.00167
id1000027	ud6001330	0.00441	0.00116	0.000403
id1000027	ud7001348	0.000218	4.79e-05	0.000155
id10000293	wd4002816	0.000813	0.00102	0.00146
id10000463	id12005977	0.000837	0.000321	0.00127
id10000463	id8005231	4.2e-05	3.01e-05	0.00016
id10000463	ud8001060	0.00173	0.000911	0.00372
id10000617	id10000651	0.000244	7.45e-05	0.000149
id10000617	id10004944	0.00424	0.00125	0.00091
id10000617	id10006957	0.000539	0.000498	0.00135
id10000617	id1012902	0.000432	0.000118	0.000534
id10000617	id1016971	0.00153	0.000301	0.000423
id10000617	id1027376	0.00095	0.000575	0.000997
id10000617	id11001264	0.000606	0.000407	0.000799
id10000617	id11003120	0.00205	0.000401	0.000682
id10000617	id11009167	0.000147	0.000192	0.000231
id10000617	id11009197	0.000603	0.000671	0.000454
id10000617	id12010106	0.000135	0.000329	0.000313
id10000617	id3002485	0.00039	0.000328	0.000856
id10000617	id3013447	0.00103	0.000996	0.00155
id10000617	id4000767	8.02e-05	0.00038	0.000288
id10000617	id5015048	0.0011	0.000732	0.00136
id10000617	id6004190	0.000705	0.00132	0.00265
id10000617	id7000897	0.000714	0.000436	0.000812
id10000617	id8000610	0.00238	0.00014	0.00024
id10000617	id8004698	6.96e-05	5.45e-05	0.000106
id10000617	ud10000231	0.000545	0.00109	0.00129
id10000617	ud12001523	0.000505	0.000326	0.00175
id10000617	ud7001208	2.18e-05	1.91e-05	8.75e-05
id10000651	id7003858	0.000604	0.00122	0.000908
id10000651	id9005712	0.000493	0.000239	0.000934
id10000651	ud7000123	0.000775	0.00097	0.00225
id10000678	ud10000729	0.000698	0.00107	0.00114
id10000974	id1007806	0.000205	0.00056	0.000877
id10000974	id2003033	0.0232	6.65e-05	0.000154
id10000974	id3007436	0.000653	0.000498	0.00151
id10000974	id4000980	3.06e-05	3.09e-05	0.000133
id10000974	id7005398	0.00041	0.000607	0.00111
id10000974	id8007655	0.00099	0.00166	0.00144
id10000974	wd8000422	0.000669	0.00127	0.000767
id10001219	ud2001743	5.4e-05	0.00732	0.00909
id10001466	id1020656	0.00172	0.00127	0.000985
id10001466	id11001373	0.00164	0.000873	0.00274
id10001466	id11008973	0.000161	0.000562	0.00042
id10001466	id11010277	0.000379	0.000435	0.000853
id10001466	id4008717	0.00112	0.000924	0.0024
id10001466	id6008546	0.000737	0.000271	0.000664
id10001466	id6016547	0.000386	0.000167	0.000459
id10001466	id8006944	7.86e-05	1.33e-05	4.35e-05
id10001655	id8001641	0.000755	0.000702	0.00137
id10001655	ud7001208	0.000353	8.83e-05	0.000465
id10001674	id2016073	0.00245	0.000754	0.00163
id10001674	id5007974	0.00207	0.00014	0.000186
id10001674	id8004698	0.000706	0.000848	0.00127
id10001727	wd11003325	0.000109	0.000116	0.00039
id10001872	id1021457	0.000892	0.0146	0.0147
id10001872	id2001549	0.0443	0.00262	0.000882
id10001872	id2016184	0.151	0.000881	0.00175
id10001900	id5001347	0.00282	0.000482	0.00108
id10001900	id5002305	0.00188	0.000498	0.00319
id10001900	id8006862	0.00149	0.000858	0.00217
id10002019	ud5000331	0.000113	3.28e-05	0.000261
id10002182	id5007974	0.000184	0.000159	0.000187
id10002182	id6016547	0.00701	0.000379	0.000838
id10002572	id6011302	0.000911	0.000444	0.000657
id10002591	wd8003271	0.00123	0.000786	0.00242
id10002710	id11000314	0.00187	0.00097	0.00168
id10002710	id11004137	0.00182	0.000826	0.00234
id10002710	id11010342	0.00132	0.000588	0.00177
id10002710	id2010160	0.000143	0.000735	0.00196
id10002710	id2012718	0.00157	0.000948	0.00236
id10002710	id5006409	0.00435	0.0003	0.000793
id10002710	id7005590	0.0009	0.00292	0.0097
id10002710	id8001212	0.000389	0.000182	0.000213
id10002710	id9002837	0.000161	0.000116	0.000327
id10003056	id2002077	0.00028	0.000361	0.000859
id10003056	id3012234	0.000197	0.000315	0.000347
id10003056	id4006672	0.000947	0.000272	0.00135
id10003188	id10005710	0.000425	0.000258	0.000973
id10003188	id1011599	0.00098	0.000886	0.000969
id10003188	id1025704	0.000141	0.000241	0.000904
id10003188	id12007606	0.00859	0.000846	0.00419
id10003188	id2009218	0.000107	8.64e-05	0.000138
id10003188	id4001968	0.00163	0.000936	0.00773
id10003188	id6005490	0.000113	0.000117	0.000174
id10003276	id11006405	0.0143	0.00022	0.000275
id10003276	id3011073	0.000625	0.00032	0.00268
id10003296	id3013825	0.000825	0.00319	0.00186
id10003296	id6005490	0.00058	0.000356	0.00076
id10003308	id11010291	0.000833	0.000955	0.00142
id10003437	id1008916	0.000156	0.000148	0.000611
id10003437	id12000006	0.000604	0.000372	0.0027
id10003812	id1001688	0.000208	0.000198	0.000421
id10003812	id1020627	0.000947	0.000848	0.00167
id10003812	id1028504	0.00111	0.000572	0.00311
id10003812	id11001975	3.59e-05	2.41e-05	4.78e-05
id10003812	id11002369	0.000574	0.000425	0.000359
id10003812	id11002394	0.000479	0.00176	0.0049
id10003812	id2010605	0.00541	0.000605	0.0024
id10003812	id2010974	0.000501	0.000318	0.0011
id10003812	id5001871	0.000928	0.00337	0.00623
id10003812	id8002668	3.09e-05	2.08e-05	4.85e-05
id10003812	id9002769	0.000127	4.95e-05	0.000168
id10003812	id9004722	0.000994	0.00547	0.00432
id1000392	id1002277	0.00201	0.000218	0.00206
id1000392	id1027642	0.0104	0.000544	0.00317
id1000392	id11008727	0.00105	0.000679	0.00209
id1000392	id2002978	5.79e-05	8.34e-05	0.000215
id1000392	id5007974	0.00411	0.000954	0.000771
id1000392	id8001041	0.00797	0.000961	0.00701
id10004150	id10005710	0.000178	0.000104	0.000394
id10004257	id12007532	0.00274	0.000522	0.00178
id10004273	id1009334	0.000625	0.00082	0.00135
id10004273	id1015550	0.000172	0.000511	0.000388
id10004273	id11008432	0.0013	0.000325	0.00171
id10004273	id11008538	0.000886	0.00133	0.00231
id10004273	id3002485	0.000285	0.000722	0.00126
id10004273	id3014566	0.000806	0.00171	0.00205
id10004273	id6003420	0.000944	0.00248	0.00533
id10004273	id6004428	0.000665	0.00136	0.00232
id10004273	ud2000066	0.0015	0.000691	0.00148
id10004327	id11002437	0.00308	0.000857	0.00426
id10004851	id11011685	0.000763	0.00032	0.000904
id10004851	id12007561	0.000327	0.000117	0.00068
id10004851	id9000077	0.00464	0.000348	0.000305
id10004920	id1009334	0.000289	0.000286	0.000471
id10004920	id1011269	0.000278	0.000192	0.000341
id10004920	id2006791	0.000869	0.000347	0.000576
id10004920	id2010341	0.000381	0.000281	0.00076
id10004920	id3009022	0.000109	5.54e-05	0.000185
id10004920	id3009463	0.00123	0.000721	0.00188
id10004920	id4001299	0.000662	0.00198	0.00214
id10004944	id1016971	0.0259	0.000493	0.000627
id10004944	id1027642	5.16e-05	2.26e-05	2.81e-05
id10004944	id11006405	0.00254	0.000398	0.00099
id10004944	id6001333	0.0114	0.000209	0.000365
id10004944	id8006944	0.000154	7.9e-05	0.000291
id10004944	ud2001743	0.000392	0.00139	0.00504
id10004944	ud7000123	0.00358	0.000599	0.00104
id10004981	id3011073	0.00171	0.000543	0.00198
id10004981	id6005490	0.00077	0.001	0.00177
id1000506	id1019512	0.00067	0.00144	0.00293
id1000506	id3008271	0.00025	0.000121	0.000145
id1000506	id8001041	0.0217	6.5e-05	0.00015
id1000506	id8003995	0.00107	0.000839	0.0046
id1000506	id9001748	0.000352	0.000145	0.000656
id1000506	id9004722	0.0365	7.72e-05	0.000133
id1000506	id9007929	0.000453	0.00333	0.0145
id1000506	wd10000774	0.000735	0.00137	0.00242
id1000529	id4002191	0.062	0.00013	0.000456
id10005300	id12003444	0.00089	0.000516	0.000699
id10005300	id2001157	0.000393	0.000216	0.000935
id10005300	id2001234	0.000178	9.2e-05	0.000365
id10005300	id2002653	0.000121	7.23e-05	0.000215
id10005300	id3000014	0.000499	0.000201	0.000684
id10005300	id3018534	0.00193	0.000737	0.00276
id10005300	id6004445	0.00147	0.000522	0.0015
id10005300	id7001679	0.000248	0.000218	0.000547
id10005300	ud10000231	0.000212	0.000112	0.000258
id10005621	id11001161	7.49e-05	0.000193	0.000877
id10005621	id11007381	0.000576	0.000418	0.00106
id10005621	id11007963	0.000632	0.000327	0.000514
id10005621	id2002978	0.00124	0.000453	0.00152
id10005621	id2010160	0.00086	0.000209	0.00117
id10005621	id7006023	0.00116	0.000536	0.000592
id10005621	id8001139	0.000803	0.000863	0.00115
id10005621	ud3000719	0.000504	0.000516	0.000777
id10005656	id6004867	0.00157	0.000699	0.00233
id10005696	id12007609	0.00218	0.000804	0.00544
id10005696	id2010097	0.000181	0.000115	0.00019
id10005710	id1000929	0.000239	0.000405	0.000698
id10005710	id1001437	0.000278	1.67e-05	9.3e-05
id10005710	id1002845	0.000596	0.000145	0.000694
id10005710	id1005398	0.00247	0.000297	0.00038
id10005710	id1012902	0.000881	0.000855	0.00225
id10005710	id11001919	8.28e-05	4.88e-05	0.000138
id10005710	id11001975	0.000111	0.000124	0.000433
id10005710	id11004137	0.000105	6.73e-05	0.000303
id10005710	id11005940	0.00454	0.000736	0.00095
id10005710	id11010872	0.00101	0.000349	0.00078
id10005710	id11011395	6.69e-05	7.98e-05	0.000118
id10005710	id12006809	0.00082	0.000672	0.000816
id10005710	id2003033	0.000205	0.000257	0.000592
id10005710	id2003700	0.0102	7.63e-05	0.000207
id10005710	id2004921	0.000404	0.00108	0.00108
id10005710	id2005051	0.000343	0.000793	0.000741
id10005710	id2009218	0.000384	0.000353	0.000682
id10005710	id2009538	6.8e-05	3.62e-05	9.18e-05
id10005710	id3007343	0.000559	0.00058	0.000703
id10005710	id3018576	3.35e-05	9.27e-05	0.000101
id10005710	id4000980	0.000896	0.000353	0.000698
id10005710	id5000077	0.000294	0.000444	0.000791
id10005710	id5004597	5.49e-05	0.000217	0.00022
id10005710	id6000856	0.000723	0.00157	0.000915
id10005710	id6001333	0.000281	0.000243	0.000512
id10005710	id6003693	0.000432	0.00145	0.00143
id10005710	id6009680	0.0144	0.000376	0.000754
id10005710	id6011302	0.000971	0.000645	0.000736
id10005710	id6011457	0.00776	0.000572	0.000754
id10005710	id6015530	0.000145	0.000358	0.000225
id10005710	id7001680	0.000833	0.00035	0.000962
id10005710	id8002284	0.000967	0.00135	0.000928
id10005710	id8004593	0.00069	0.00138	0.00118
id10005710	ud5000331	0.00312	0.000155	0.000376
id10005710	ud5000957	7.27e-05	3.06e-05	0.000106
id10005710	ud7000123	0.000495	0.0004	0.000645
id10005710	wd7001153	3.84e-05	3.61e-05	0.000117
id10006132	id1000956	0.000213	3.48e-05	5.78e-05
id10006132	id1004257	0.0017	0.000792	0.00262
id10006132	id1004466	0.000478	0.000611	0.000724
id10006132	id1010313	0.0274	0.000556	0.00181
id10006132	id1010659	3.64e-05	7.14e-06	6.37e-05
id10006132	id11000314	0.000744	0.00155	0.00407
id10006132	id11004731	0.000898	0.00355	0.00242
id10006132	id11004784	0.0012	0.000396	0.00053
id10006132	id11009898	0.000293	3.98e-05	0.000156
id10006132	id12007644	0.00144	0.000899	0.00189
id10006132	id12009869	0.000715	0.00105	0.00156
id10006132	id2010403	0.000472	2.64e-05	7.07e-05
id10006132	id2010945	0.000622	0.000491	0.00081
id10006132	id2013119	0.0004	0.000791	0.00229
id10006132	id3012562	0.000542	0.000119	0.00113
id10006132	id4002349	0.00355	0.000354	0.00154
id10006132	id4006805	0.00174	0.00054	0.0015
id10006132	id5008813	0.000405	0.000381	0.0011
id10006132	id6005006	0.00122	0.00084	0.00156
id10006132	id6005361	0.000388	0.000517	0.000768
id10006132	id6005490	0.00203	0.000163	0.00128
id10006132	id6008546	0.00197	0.0006	0.00161
id10006132	id6011273	0.000994	0.00156	0.00211
id10006132	id8002628	0.000317	0.000501	0.000634
id10006132	id8007655	0.000882	0.000174	0.000224
id10006132	id9001081	0.00134	4.7e-05	0.000192
id10006132	ud4000142	0.000502	0.000673	0.000963
id10006132	ud9000881	0.00917	9.58e-05	0.000176
id10006132	wd8002797	0.000199	0.000243	0.000369
id10006222	id1014178	0.00102	0.000927	0.00123
id10006222	id1020627	0.000482	0.000696	0.00154
id10006222	id3014722	7.97e-05	0.000158	0.000344
id10006222	id5001871	0.000597	0.00179	0.00786
id10006222	id6004445	0.000638	0.00623	0.0182
id10006222	id6012706	0.00155	0.000282	0.00129
id10006222	ud11001030	0.000962	0.00694	0.00752
id10006304	id11004731	4.89e-05	4.58e-05	0.000174
id10006304	id11008727	0.00167	0.000847	0.00358
id10006304	id11009565	0.000439	0.000223	0.00108
id10006304	id3014722	0.000305	0.00123	0.00117
id10006304	id4008092	0.000457	0.000393	0.00172
id10006304	id5008813	0.0039	0.000615	0.000576
id10006304	ud5000331	0.000384	0.000473	0.000936
id10006378	id1027642	0.00188	0.000595	0.00138
id10006378	id11005869	0.000332	0.000112	0.000472
id10006378	id12004584	0.00139	0.000615	0.00456
id10006378	id12005350	0.000547	0.00023	0.000831
id10006378	id9007236	0.000349	0.000206	0.000491
id10006378	ud10000231	0.000706	0.000583	0.00109
id10006378	ud10000307	0.00113	0.000496	0.00315
id10006470	id1007806	0.000233	0.000517	0.000729
id10006470	id11008538	0.000238	0.000194	0.000647
id10006470	id3009022	0.000153	8.27e-05	0.00106
id10006470	id6003420	0.0014	0.000789	0.00256
id10006470	id9007850	0.000641	0.000787	0.00274
id10006470	ud5000325	0.000852	1	1
id10006647	id11011373	0.000163	0.000133	0.00023
id10006647	id2010209	0.000252	0.000446	0.00036
id10006647	id3000421	0.000232	0.000364	0.000342
id10006647	id8002218	0.00182	0.000631	0.00209
id10006728	id2013074	0.000379	0.00033	0.000519
id10006892	id2010969	0.000855	0.000271	0.00131
id10006910	id11011061	0.0014	0.000944	0.000679
id10006910	id11011341	0.000614	0.000215	0.000946
id10006910	id3011044	0.000938	0.00024	0.00108
id10006910	id4000354	0.000279	0.000179	0.000448
id10006935	id4009650	0.00149	0.000997	0.00342
id10006957	id1004990	0.000216	0.00133	0.000844
id10006957	id4004005	0.000636	0.00065	0.00133
id10006957	id4005217	0.000997	0.000572	0.000913
id10006957	id4010698	0.0018	0.000706	0.00136
id10006957	id5013951	0.00024	0.000949	0.000813
id10006957	id6000003	0.000539	0.000588	0.00165
id10006957	id6006753	9.96e-05	0.000174	0.000112
id10006957	id6011302	0.000279	0.000346	0.000354
id10006957	wd10000263	0.000668	0.00067	0.00128
id10007031	id11009197	9.44e-05	0.000142	0.000195
id10007031	id4006690	0.000762	0.000508	0.00229
id10007031	id5003807	0.000866	0.000507	0.00135
id10007031	id5015048	0.00191	0.000863	0.0022
id10007031	id7004422	0.00176	0.000676	0.00341
id10007116	id11008432	0.000969	0.00196	0.00298
id10007116	ud4000058	0.000129	0.000198	0.000372
id10007368	id11008538	0.00181	0.000814	0.00301
id10007368	id2010209	0.000282	0.000239	0.000352
id10007368	id2013412	0.000324	0.000217	0.000204
id10007368	id5003785	0.00294	0.000873	0.00214
id1000929	id2009218	0.00129	0.000619	0.00363
id1000929	id6005490	7.43e-05	0.000138	0.000136
id1000929	id6011457	0.000789	0.000327	0.000846
id1000956	id1008115	0.000171	0.000274	0.000925
id1000956	id1012442	0.00037	0.00096	0.00136
id1000956	id11001086	7.51e-05	0.000801	0.000957
id1000956	id11001919	9.72e-05	2.84e-05	4.76e-05
id1000956	id11009197	0.000943	0.000706	0.00143
id1000956	id11010872	6.14e-05	0.000307	0.000685
id1000956	id12010106	0.00045	0.00463	0.00676
id1000956	id2001421	0.000205	0.000411	0.000463
id1000956	id2008517	0.00731	0.000105	0.000209
id1000956	id5004597	0.000172	0.0022	0.00199
id1000956	id6001333	0.000407	3.97e-05	7.56e-05
id1000956	id8001958	5.18e-05	2.79e-05	4.43e-05
id1000956	id8004593	0.00137	0.00104	0.000986
id1000956	ud2001743	0.0279	0.000124	0.000229
id1000956	ud6000233	0.00431	0.00016	0.000195
id1000956	ud7001208	0.000589	0.00324	0.00313
id1001437	id1016971	0.00462	0.000457	0.00071
id1001437	id4000767	4.88e-05	4.56e-05	7.72e-05
id1001437	id6003372	0.00114	0.000805	0.000996
id1001437	id8004698	4.62e-05	1.93e-05	0.000105
id1001437	id9005712	0.00419	0.00087	0.00512
id1001655	id2008891	0.00501	0.000639	0.00152
id1001655	id2010974	0.001	0.000371	0.00143
id1001655	id8002862	0.00027	0.000548	0.00343
id1001688	id1013039	0.00144	0.000127	0.00117
id1001688	id11002394	0.000635	0.00335	0.0093
id1001688	id12005858	0.00067	7.48e-05	0.00043
id1001688	id2010969	0.000347	0.000286	0.000724
id1001688	id4000980	0.000767	0.000308	0.000755
id1001688	id7001730	0.00045	0.000297	0.00109
id1001688	id7004719	0.00199	0.00093	0.00228
id1001688	id7005616	0.000255	0.000249	0.000426
id1001688	id8007655	0.000465	0.000329	0.000396
id1001688	ud11001517	0.000849	0.000596	0.000927
id1001688	wd2002230	0.000534	0.000464	0.00107
id1001915	id11001975	0.00213	0.000715	0.00151
id1001915	id11009117	2.86e-05	7.45e-05	6.81e-05
id1001915	id2010265	0.000706	0.000806	0.000533
id1001915	id2010605	0.000591	0.00124	0.00347
id1001916	id2004552	0.000597	0.00102	0.00149
id1001916	id6011302	9.24e-06	9.89e-06	1.64e-05
id1001916	id8007655	0.000199	0.000223	0.000226
id1002165	id1002201	0.00204	0.000291	0.00136
id1002165	id2007095	0.0016	0.000899	0.00142
id1002165	id3003813	0.0023	0.000763	0.00153
id1002165	id9001565	0.000711	0.000631	0.00184
id1002165	id9001629	0.000466	0.000293	0.000864
id1002201	id2009420	0.000493	0.00115	0.00259
id1002201	id2015172	0.000362	0.000237	0.000821
id1002201	id3018534	0.00107	0.00162	0.000599
id1002201	id6006302	0.000859	0.00215	0.000974
id1002201	id6006868	0.000165	0.000489	0.000507
id1002201	id6010791	0.000259	0.000278	0.000645
id1002201	id6011452	0.000301	0.000525	0.000321
id1002201	id7006074	0.000322	0.000835	0.000481
id1002201	id7006095	0.000516	0.000609	0.00409
id1002201	id9005522	0.000917	0.00169	0.00112
id1002201	wd11003168	6.63e-05	3.67e-05	0.000133
id1002277	id12010129	0.00148	0.000853	0.00206
id1002277	id2001234	0.000257	0.000202	0.000721
id1002277	id2010974	0.000539	0.000514	0.00185
id1002277	id4002112	0.000529	0.000123	0.000524
id1002317	id8002862	2.29e-05	0.000184	0.00153
id1002547	id2010326	0.000947	0.000333	0.00138
id1002547	id2010605	0.000606	0.000226	0.00132
id1002547	id6006302	0.00047	0.000775	0.00209
id1002547	id9003079	0.000692	0.00047	0.000886
id1002845	id1008791	0.00669	0.000222	0.000318
id1002845	id11001919	0.000257	9.94e-05	0.000585
id1002845	id11006405	0.000765	0.00235	0.00278
id1002845	id11010872	0.000901	0.00134	0.002
id1002845	id2003153	0.00406	0.000508	0.000958
id1002845	id2011302	0.00204	0.000511	0.00146
id1002845	id3002485	0.000625	0.000484	0.000864
id1002845	id4000767	0.000229	0.000103	0.000409
id1002845	id4010688	0.000123	0.000184	0.000438
id1002845	id5008813	0.00114	0.000294	0.000496
id1002845	id5013951	0.00441	0.000628	0.000946
id1002845	id6003420	0.00427	0.000434	0.000387
id1002845	id7003858	0.000332	0.000591	0.00158
id1002845	id8001212	0.00175	0.000331	0.00054
id1002845	id8002668	0.00441	0.000154	0.000944
id1002845	id9002705	6.93e-05	0.000337	0.000283
id1002845	ud2000541	0.00109	0.000903	0.0027
id1002845	ud4001716	0.00279	0.000546	0.00115
id1002845	ud6000066	0.00411	0.00019	0.000287
id1002845	ud6000233	0.000778	0.0089	0.0178
id1002845	wd9001104	0.00815	0.000211	0.000869
id1002931	id1027642	8.9e-05	0.000145	0.000241
id1002931	id3017313	0.00083	0.0015	0.00104
id1002931	id6003372	6.74e-05	5.74e-05	0.000339
id1002931	id6011457	0.000397	0.000588	0.00179
id1002931	id9005712	0.0015	0.000277	0.00356
id1002931	ud2001743	0.000265	0.00231	0.00518
id1003019	id1005408	0.000661	0.000813	0.000959
id1003019	id1008916	0.000432	0.000367	0.000574
id1003019	id1015550	0.000844	0.000608	0.00178
id1003019	id11002134	0.000305	4.18e-05	0.000136
id1003019	id5004904	5.44e-05	1.49e-05	8.3e-05
id1003019	ud7001994	0.0013	0.000638	0.00208
id1003423	id1025704	0.000125	0.000678	0.00174
id1003423	id11008538	0.000539	0.000265	0.00116
id1003423	id4006576	0.00111	0.000562	0.000919
id1003423	id8005231	0.000273	0.000749	0.00222
id1003960	id8006944	0.000992	7.86e-05	0.000313
id1004257	id11008538	0.00138	0.00073	0.00344
id1004257	id2010160	0.000311	0.000151	0.00104
id1004257	id6011727	0.000431	0.000619	0.000766
id1004257	id8006944	0.000646	0.000559	0.00084
id1004321	id2003033	0.000407	0.000237	0.000867
id1004321	id5015048	0.00397	0.000982	0.00269
id1004321	id7003207	0.00101	0.000348	0.000551
id1004321	id8006944	0.00156	0.000972	0.00218
id1004466	id1006289	0.00492	0.000837	0.00622
id1004466	id1027640	0.00203	0.000492	0.000668
id1004466	id1027642	0.000602	0.000527	0.000971
id1004466	id2003033	0.000736	0.00057	0.00179
id1004466	id9001039	0.000226	0.000184	0.000346
id1004466	wd6002655	0.0017	0.000333	0.00104
id1004870	id5014488	0.00159	0.000405	0.00579
id1004870	id8001041	8.12e-05	8.78e-05	0.000217
id1004870	id9004722	2.95e-05	5.71e-06	9.09e-06
id1004870	wd12004105	0.000379	0.000297	0.00154
id1004990	id11009197	1.53e-05	3.34e-05	0.000316
id1004990	id12003060	0.000661	0.00229	0.0041
id1004990	id2003033	8.15e-05	7.37e-05	0.000264
id1004990	id7002801	0.000701	0.0041	0.0126
id1005158	id1017963	0.000591	0.000744	0.00165
id1005158	id11009565	0.000315	0.000982	0.00125
id1005158	id12002594	0.00239	0.000992	0.00397
id1005158	id12009189	0.00178	0.00076	0.00239
id1005158	id4000827	0.00153	0.000932	0.00114
id1005158	id8004698	0.0224	0.0007	0.00111
id1005158	id8006944	0.00166	0.000626	0.00275
id1005158	ud6000233	0.000293	0.00139	0.00544
id1005158	ud9001252	0.00102	0.000956	0.00128
id1005371	ud7001211	0.0022	0.000781	0.00459
id1005398	id7003114	0.000231	0.000223	0.000753
id1005398	ud5000325	0.000306	1	1
id1005408	id1016971	0.00658	0.000691	0.00211
id1005408	id11001919	0.00205	0.000335	0.000825
id1005408	id11008538	4.75e-05	5.21e-06	5.88e-05
id1005408	id11010400	0.00163	0.000886	0.0016
id1005408	id2001574	0.000602	0.000437	0.00067
id1005408	id2015172	0.000312	0.000378	0.000899
id1005408	ud7001994	0.000288	0.000811	0.00169
id1005429	id4001968	0.00121	0.000717	0.00435
id1005429	id8005215	0.000754	0.000202	0.000443
id1005455	id11001919	0.00167	0.000841	0.00306
id1005455	id12010106	0.00518	0.000977	0.00466
id1005455	ud1000074	0.00178	0.000905	0.00263
id1005815	id6004428	0.000805	0.000728	0.000983
id1006289	id11005447	0.000531	0.000502	0.000507
id1006289	id6011302	0.00342	0.00107	0.000959
id1006289	ud2001743	0.0006	0.00665	0.0183
id1006487	id1013489	0.000353	0.000126	0.000415
id1006487	id12009383	0.000658	0.00029	0.000976
id1007272	ud5000325	0.000109	1	1
id1007806	id1009334	0.00186	0.000882	0.00199
id1007806	id1013779	0.000974	0.00271	0.00267
id1007806	id11002142	0.00052	0.00059	0.00173
id1007806	id11008797	0.000833	0.00139	0.00149
id1007806	id11009452	0.000656	0.000176	0.000466
id1007806	id12005858	0.0182	0.000739	0.00398
id1007806	id2014672	7.63e-05	0.000389	0.000621
id1007806	id3001810	0.000455	0.000369	0.000524
id1007806	id5002442	7.15e-05	0.000115	0.000543
id1007806	id5002601	0.00095	0.00286	0.00171
id1007806	id5008654	0.000796	0.000168	0.000666
id1007806	id6010126	0.00072	0.000744	0.00294
id1007806	id6016879	0.000885	0.00252	0.00416
id1007806	id8007185	0.000524	0.000512	0.000852
id1007806	wd1000197	0.000803	0.001	0.00367
id1007806	wd11003168	0.000171	0.000363	0.00105
id1007806	wd4000128	0.000419	0.000558	0.00298
id1007855	id1015653	0.00115	0.000862	0.00303
id1007855	id2003153	0.000293	0.000337	0.000976
id1007855	id2008517	0.000502	0.00885	0.0169
id1007855	id2012373	0.000726	0.000523	0.00139
id1007855	id5007974	0.000284	0.00162	0.00304
id1007855	id6011452	0.000619	0.000867	0.000471
id1007855	id8002284	0.00167	0.00146	0.000744
id1007855	ud11001343	0.00118	0.000635	0.00291
id1008090	id8007655	0.000709	0.000272	0.00105
id1008090	id9002707	0.00099	0.000757	0.000628
id1008115	id1024696	0.000576	0.000298	0.00075
id1008115	id11005447	0.000308	0.000381	0.000336
id1008115	id3012622	0.00054	0.000593	0.00108
id1008115	id5014460	0.000512	0.000408	0.000773
id1008206	id8002862	0.00181	0.000883	0.00323
id1008245	id3012622	0.00121	0.000696	0.00143
id1008245	ud11001282	0.00153	0.000761	0.00241
id1008245	ud6000233	0.000932	0.00335	0.00481
id1008381	id11008538	0.000389	0.000225	0.000614
id1008381	id6012152	0.0137	0.000659	0.00283
id1008381	id6016745	0.00341	0.000882	0.00373
id1008485	id11005935	0.0007	0.00219	0.00304
id1008485	ud11001422	0.00101	0.000405	0.0008
id1008791	id1017725	8.58e-05	5.52e-05	0.000139
id1008791	id11001264	0.000861	0.000542	0.000725
id1008791	id11010349	0.000817	6.41e-05	0.000337
id1008791	id11011110	0.00219	0.000507	0.00308
id1008791	id11011169	0.000588	0.000482	0.000716
id1008791	id2001574	0.0036	0.000856	0.0017
id1008791	id2003033	0.000325	0.000142	0.000232
id1008791	id4000354	0.0062	0.000791	0.00157
id1008791	id4000901	0.000218	0.000249	0.00018
id1008791	id4000949	0.00395	0.000704	0.00231
id1008791	id4005074	0.000264	9.2e-05	0.000156
id1008791	id4005225	0.000127	3.46e-05	9.25e-05
id1008791	id4010522	0.000697	0.000127	0.00059
id1008791	id6010909	0.00207	0.000273	0.000531
id1008791	id7005616	0.00402	0.000997	0.00233
id1008791	id8001343	0.00471	0.000412	0.00138
id1008791	id8001738	0.00697	0.000449	0.00162
id1008791	id8007655	6.33e-05	5.14e-05	7.12e-05
id1008791	id9001039	3.77e-05	1.04e-05	3.47e-05
id1008791	id9004722	0.00733	0.000217	0.000351
id1008791	ud2001743	0.0656	0.0004	0.000711
id1008791	ud6000233	0.0192	0.00051	0.000602
id1008791	wd8000422	0.00052	9.1e-05	8.69e-05
id1008856	id1014808	0.000215	4.15e-05	0.000271
id1008916	id1014127	7.42e-05	2.41e-05	0.000256
id1008916	id11004960	0.00113	0.000161	0.0032
id1008916	id2004552	0.00239	0.000646	0.00505
id1008916	id2009569	0.0021	0.000987	0.00155
id1008916	id2013119	0.000828	8.85e-05	0.000792
id1008916	id3000735	0.000445	0.000125	0.000701
id1008916	id3017553	0.0025	0.000553	0.00425
id1008916	id8002668	0.000256	0.000177	0.000611
id1008916	id9002507	0.000482	0.000567	0.0008
id1008916	wd4003084	0.00095	0.000337	0.00104
id1009146	id11008538	0.00011	0.00013	0.00033
id1009146	id11008727	0.000334	0.000276	0.00083
id1009146	id12004584	0.000336	0.000324	0.00166
id1009146	id3003813	0.000865	0.000396	0.00179
id1009146	id5009666	0.00026	0.000331	0.000864
id1009146	id5013816	0.000982	0.000384	0.00128
id1009146	id8001041	0.00119	0.00023	0.000708
id1009146	ud7000123	0.000373	0.000388	0.00123
id1009188	id11008727	0.000133	9.51e-05	0.000153
id1009188	id8004698	7.22e-05	6.9e-05	7.03e-05
id1009334	id11008538	0.00341	0.00072	0.00423
id1009334	id7003437	0.000263	9.69e-05	0.000381
id1010313	wd7002642	0.00112	0.000735	0.00345
id1010659	id1014178	0.000265	0.000212	0.00072
id1010659	id5007974	0.000181	0.000316	0.000444
id1010659	id8004698	0.00174	0.000196	0.00125
id1010659	ud2001743	0.000214	0.000456	0.00119
id1010659	wd9001475	0.00017	0.000192	0.000263
id1010769	id12005129	0.00118	0.000438	0.00187
id1011190	id1027640	0.00114	0.000591	0.00287
id1011269	id3009022	0.00101	0.000548	0.00394
id1011487	id11008538	7.83e-05	6.42e-05	0.000293
id1011487	id2010160	0.000955	0.00191	0.00316
id1011487	id3007343	0.00128	0.00145	0.000969
id1011487	ud2001743	0.000103	0.00784	0.0111
id1011487	ud6000233	0.00043	0.00307	0.00824
id1011487	wd7002028	0.000126	0.00016	0.000173
id1011599	wd2002230	0.00162	0.00087	0.0015
id1011852	id2010160	0.000133	0.000243	0.00149
id1011852	id2010676	0.000143	6.13e-05	0.000269
id1011914	id2010160	0.00013	0.000348	0.000785
id1011914	id2013042	0.00222	0.000643	0.00139
id1011914	id3014566	0.000814	0.00163	0.00267
id1011914	id5005744	0.000839	0.000815	0.000934
id1012442	id11000314	0.000389	0.00174	0.00138
id1012442	id2000530	0.000518	0.000395	0.000814
id1012442	id2003033	6.26e-05	6.08e-05	9.43e-05
id1012442	id2004921	0.000162	0.000179	0.000238
id1012442	id2005031	0.000834	0.00179	0.00112
id1012442	id2008517	0.000397	0.00523	0.00853
id1012442	id4000980	0.00227	0.000572	0.00159
id1012442	id4010673	0.00188	0.000312	0.000492
id1012442	id6016824	0.000424	0.00035	0.000961
id1012442	id7001680	0.000176	0.000352	0.000418
id1012442	id8005609	0.000832	0.000644	0.00117
id1012754	id12009189	0.00112	0.00082	0.00229
id1012754	id2001549	0.00064	0.0379	0.0763
id1012754	id5006409	0.00245	9.69e-05	0.000114
id1012902	id11006405	0.00204	0.000901	0.00134
id1012902	id11008727	0.000525	0.000658	0.00186
id1012902	id2011302	0.00895	0.000333	0.000469
id1012902	id5008813	0.000661	0.00167	0.0011
id1012902	id9005712	0.00122	0.000728	0.00178
id1013004	id11000314	0.000729	0.00315	0.00646
id1013004	id11002781	0.000544	0.00129	0.0028
id1013004	id6011710	0.000555	0.000513	0.000562
id1013004	id8002284	0.00096	0.00103	0.00146
id1013039	id8007655	0.000188	7.44e-05	0.00042
id1013126	id11009197	0.00118	0.00082	0.00512
id1013126	id2001699	0.000651	0.000667	0.000622
id1013126	id2002077	0.000235	0.00014	0.000286
id1013126	id2007218	0.00119	0.000878	0.00117
id1013126	id3001390	0.000182	0.000139	0.000137
id1013126	id5006409	0.00163	8.86e-05	4.52e-05
id1013126	id5015048	2.79e-05	6.01e-06	3.98e-05
id1013126	id8004698	0.000227	6.86e-05	0.000104
id1013265	id4002447	0.000747	0.0006	0.000866
id1013265	id8001041	5.66e-05	0.000162	0.000314
id1013265	id8004698	0.0132	0.000959	0.00194
id1013380	id11007092	0.0016	0.000469	0.00215
id1013380	id2013544	9.22e-05	3.36e-05	0.000128
id1013385	id11008538	4.6e-05	2.45e-05	0.000136
id1013385	id11008727	0.000305	0.000209	0.000888
id1013385	id2000530	0.000534	0.000913	0.000582
id1013385	id2002025	0.000705	0.00166	0.00291
id1013385	id6004428	0.00118	0.000204	0.000752
id1013385	id8000831	0.000185	0.000384	0.000907
id1013385	ud8000062	0.00027	0.000182	0.00081
id1013385	wd1000197	0.00208	0.000958	0.00253
id1013489	id2016162	0.000689	0.00495	0.0102
id1013489	id3001390	0.00182	0.000457	0.00103
id1013489	id6015231	0.000773	0.00035	0.000598
id1013489	id8000831	0.000338	0.00024	0.00125
id1013527	id11008538	3.11e-05	3.52e-05	0.000104
id1013527	id2001574	0.00255	0.000258	0.00102
id1013527	id2005051	2.08e-05	8.91e-05	0.000514
id1013527	id7000660	0.00015	0.000103	0.000492
id1013628	id11001716	9.68e-05	0.000566	0.00111
id1013628	id11010400	0.000683	0.00108	0.00212
id1013628	id12006396	0.0008	0.000474	0.0013
id1013628	id2001432	0.00101	0.000513	0.00261
id1013628	id2003153	9.75e-05	0.000172	0.00045
id1013628	id2004921	0.000247	0.000148	0.000302
id1013628	id3007769	3.2e-05	3.73e-05	0.000111
id1013628	id5000411	0.00045	0.00447	0.0049
id1013628	id5001182	0.000196	4.96e-05	0.000737
id1013628	id6016913	9.65e-06	1.68e-06	2e-05
id1013628	id7005590	0.000155	0.000158	0.000703
id1013628	id8001212	0.000363	0.000544	0.000542
id1013628	id8001641	0.0053	0.000685	0.00426
id1013628	id8003013	0.000888	0.00221	0.00247
id1013628	id8007655	0.000299	0.000147	0.000225
id1013628	id9001232	0.0013	0.000907	0.00419
id1013628	id9003436	0.0013	0.000803	0.00402
id1013628	id9005422	0.000758	0.001	0.00282
id1013628	id9005956	0.00145	0.000704	0.00234
id1013628	ud12000265	0.00206	0.00131	0.000805
id1013628	ud7001348	0.000175	0.000367	0.000459
id1013628	wd7000321	6.49e-05	2.45e-05	0.000174
id1013701	id2000530	0.000147	6.01e-05	0.000296
id1013701	id2001574	0.00122	0.000169	0.000379
id1013701	id2003033	0.000115	7.86e-05	0.00015
id1013701	id6014700	0.00111	0.000998	0.00185
id1013701	ud3000719	0.000418	8.23e-05	0.000187
id1013745	id12002616	8.23e-05	2.09e-05	0.000344
id1013779	id6006753	0.00262	0.000517	0.00264
id1014127	id3000421	0.000922	0.00131	0.00127
id1014178	id2010593	0.00075	0.00102	0.00192
id1014178	id5004597	0.00083	0.000413	0.00113
id1014178	id5014460	0.000311	0.000575	0.00105
id1014178	id6011457	0.00078	0.00106	0.00133
id1014178	id7003929	0.000443	0.000448	0.00183
id1014178	id7005698	0.00235	0.000653	0.0018
id1014178	id8006200	0.0011	0.000976	0.00292
id1014382	id2010160	0.0411	0.000981	0.0044
id1014808	id11004784	0.000911	0.00141	0.0041
id1014808	id11011395	0.00036	0.000149	0.000449
id1014808	id2000530	0.000747	0.00221	0.00215
id1015061	id8003995	0.000695	0.00202	0.00323
id1015235	id11007903	0.00369	0.000755	0.0026
id1015235	id12000389	0.000871	0.000185	0.000292
id1015235	id2010836	0.000274	0.000171	0.000559
id1015235	id2013119	0.00854	0.000512	0.00409
id1015235	id4008092	0.000376	0.000398	0.000849
id1015235	id4010716	0.00507	0.000849	0.00436
id1015235	id5000702	0.00149	0.000572	0.000964
id1015235	id5006409	0.000355	0.000158	0.000441
id1015235	id9004234	0.00381	0.000607	0.00112
id1015380	id9000002	0.00195	0.000786	0.00292
id1015550	id1027642	0.000348	0.000451	0.0014
id1015550	id11008849	9.38e-05	0.000106	0.000268
id1015550	id11011395	0.000175	0.000417	0.000362
id1015550	id12005129	0.000947	0.00153	0.0029
id1015550	id12010129	0.000556	0.000559	0.00148
id1015550	id2002653	0.000614	0.000306	0.003
id1015550	id2013119	0.000388	0.000244	0.000761
id1015550	id4011190	0.000455	0.000679	0.000893
id1015550	id5006409	0.000992	0.00116	0.00273
id1015550	id6005006	0.000312	0.00114	0.000863
id1015550	id7001680	0.000777	0.000361	0.00203
id1015550	id7002869	0.00058	0.000282	0.00157
id1015550	id7006095	0.000212	9.64e-05	0.00024
id1015620	ud5000325	0.000605	1	1
id1015721	id1020656	0.0039	0.000904	0.00187
id1015721	id1025704	0.000396	0.00172	0.00612
id1015721	id11008538	0.00084	0.00155	0.00282
id1015721	id5000447	0.000739	0.00125	0.0019
id1015721	id5001061	0.000785	0.000361	0.00114
id1015721	id6003420	0.000158	0.000178	0.000346
id1015721	id6015231	0.000266	0.000356	0.000303
id1015721	ud6000233	0.000901	0.00793	0.0189
id1015721	wd7002028	0.00087	0.000515	0.0018
id1015932	ud2001743	0.000931	0.0102	0.0171
id1016883	id11001161	0.000201	0.00189	0.00497
id1016883	id11008538	0.000862	0.00163	0.00357
id1016883	id11009201	0.00216	0.00026	0.000964
id1016883	id2010593	0.00222	0.000654	0.001
id1016883	ud2001743	2.31e-05	0.000311	0.0016
id1016971	id1027642	0.000212	0.000299	0.00121
id1016971	id11001919	0.000281	0.000527	0.00146
id1016971	id11001975	0.042	0.00023	0.000951
id1016971	id11008727	0.00101	0.000807	0.00331
id1016971	id11010900	0.00599	0.000505	0.00172
id1016971	id11011180	0.0335	0.000785	0.000933
id1016971	id12004548	0.000412	0.000453	0.00312
id1016971	id12007063	0.000259	0.000224	0.00036
id1016971	id2011302	0.00379	0.00036	0.000458
id1016971	id2016162	0.000686	0.0128	0.0072
id1016971	id3002485	0.0014	0.000184	0.000293
id1016971	id3011972	0.000558	0.000154	0.000467
id1016971	id4000869	0.000577	5.4e-05	0.000385
id1016971	id4004677	0.000994	0.00505	0.00676
id1016971	id4007595	8.58e-05	0.000162	0.000578
id1016971	id4010691	0.0889	0.000802	0.00177
id1016971	id5000501	0.00551	0.000476	0.000707
id1016971	id5008813	0.00102	0.000454	0.000679
id1016971	id5013951	0.00436	0.000924	0.00126
id1016971	id8001212	0.00157	0.000493	0.000723
id1016971	id8002284	0.000277	0.000385	0.00107
id1016971	id8002668	3.39e-05	3.41e-05	9.65e-05
id1016971	id8004698	0.000185	0.000278	0.000366
id1016971	id8005609	3.26e-05	2.73e-05	0.000129
id1016971	id8006959	3.68e-05	0.000352	0.000502
id1016971	id9001825	0.000674	0.00722	0.0103
id1016971	wd11003228	0.103	0.000962	0.00173
id1016971	wd8002969	0.899	0.00054	0.000735
id1017307	id2016368	0.00244	0.000909	0.00125
id1017544	id3017311	0.00066	0.00125	0.00118
id1017544	id4000949	5.83e-05	2.1e-05	0.000107
id1017544	ud2001743	0.000754	0.00572	0.0119
id1017679	id8002862	0.000778	1	1
id1017725	id5006409	0.00096	0.000129	9.83e-05
id1017963	id12001440	0.000652	0.000453	0.00114
id1017963	id5003807	0.000217	0.000221	0.000537
id1018975	id6004236	0.00104	0.000742	0.00186
id1019512	id3002787	0.000279	6.51e-05	0.00011
id1019512	id4006504	0.000467	0.000365	0.000669
id1019512	id5014460	0.00015	0.000565	0.000652
id1019512	ud10000806	0.000333	0.00044	0.00176
id1019512	ud5000325	0.00276	0.000434	0.00241
id1020587	id8002862	0.000137	0.0145	0.022
id1020593	id1020656	0.0198	0.000479	0.00124
id1020627	id1027642	0.000547	0.000754	0.000878
id1020627	id11010846	0.000727	0.000774	0.000567
id1020627	id6011457	3.55e-05	5.91e-06	2.9e-05
id1020627	id7004665	4.48e-05	4.32e-05	0.000114
id1020627	id8004698	0.00707	0.000207	0.000788
id1020627	id8006944	0.000144	6.49e-05	0.000247
id1020627	ud2001743	6.21e-05	0.00356	0.0137
id1020656	id11008571	0.00145	0.00089	0.00218
id1020656	id3015622	0.000326	0.000828	0.00143
id1020656	id6005672	0.000157	0.000448	0.000187
id1020656	id7005398	0.00243	0.000299	0.000696
id1020656	id9007236	0.000786	0.00134	0.000853
id1020656	ud9000363	0.000739	0.00157	0.00126
id1021457	id11011527	0.000168	0.00187	0.00255
id1021457	id4010428	0.00024	0.00751	0.0168
id1021457	id6003693	0.000937	0.0111	0.0142
id1021568	id7002169	0.000323	0.000416	0.00098
id1021777	id2001745	0.00114	0.000269	0.00113
id1021777	id6004035	0.00209	0.000948	0.00502
id1021777	id6004428	0.000504	0.000957	0.00117
id1021777	id8005609	0.00065	0.000352	0.000894
id1021903	id1025013	0.000442	0.0025	0.00355
id1021903	id1028213	0.000958	0.0126	0.00952
id1021903	id2010734	0.000543	0.00174	0.0047
id1021903	id6005672	0.000699	0.00264	0.00753
id1021929	id11008727	0.000253	0.000309	0.000585
id1021929	id11009167	0.00234	0.00082	0.00442
id1021929	id2001234	0.000739	0.000345	0.000887
id1021929	id4010716	0.000489	0.000366	0.00046
id1021929	id5006100	0.000533	0.000648	0.000917
id1022168	id8002862	0.000445	0.00423	0.00738
id1022570	id7000897	0.00148	0.000791	0.00224
id1023985	id11000824	0.000879	0.000709	0.00101
id1023985	id2002077	5.96e-05	2.46e-05	0.00045
id1024696	id11001161	0.000252	0.00158	0.00342
id1024696	id11007933	0.0014	0.000765	0.00482
id1024696	id11010975	0.00283	0.000838	0.00231
id1024696	id4011628	0.000703	0.0528	0.0834
id1024936	id12002616	0.000612	0.000185	0.00209
id1024936	id2010541	0.000331	0.000357	0.000634
id1024936	id3011078	0.000511	0.00107	0.00154
id1025703	id6011452	0.000541	0.000915	0.000558
id1025704	id11010962	0.000435	0.000922	0.00256
id1025704	id12005858	0.00079	0.000841	0.00601
id1025704	id2010836	0.000215	0.000821	0.00216
id1025704	id3013447	0.000526	0.00209	0.00882
id1025704	id3015622	0.000998	0.00736	0.016
id1025704	id7002801	0.000276	0.00205	0.00454
id1025704	id9001039	0.000518	0.00121	0.00336
id1025704	ud12001424	0.000711	0.00303	0.00606
id1025990	id6016598	0.00158	0.00068	0.00236
id1026421	id11001975	0.00113	0.00089	0.00206
id1026704	id5007974	0.000764	0.000932	0.000953
id1026704	id6016129	0.000897	0.00213	0.00391
id1027025	id3011075	9.36e-05	0.000125	0.000269
id1027099	id11006633	0.00115	0.000817	0.00156
id1027325	id11008727	0.000549	0.000546	0.00104
id1027325	id11009197	0.000224	0.000116	0.000616
id1027325	id6013865	0.00239	0.000442	0.0014
id1027325	id9002707	0.000455	0.000541	0.00113
id1027376	id11006164	0.000151	0.000184	0.00027
id1027376	id11008727	0.00035	0.000307	0.000785
id1027376	id2003033	0.000644	0.00108	0.000566
id1027376	id5000819	0.000812	0.000296	0.000379
id1027376	id6003372	3.68e-05	7.79e-06	2.83e-05
id1027376	id7001680	0.000559	0.00132	0.00166
id1027420	id8000831	0.000955	0.00238	0.00267
id1027420	ud2000917	8.29e-05	4.69e-05	0.000231
id1027434	id11002394	0.000209	0.00116	0.00303
id1027434	id11010975	0.000324	0.000337	0.000338
id1027434	id2001549	0.000939	0.0217	0.0211
id1027434	ud2000917	0.000856	0.000398	0.000995
id1027434	ud5000325	0.000138	0.00268	0.0036
id1027602	id1027642	0.00298	0.000613	0.00163
id1027602	id11008727	0.000102	5.82e-05	0.000107
id1027602	id2005031	0.00165	0.000889	0.00241
id1027640	id11010214	0.00038	0.00028	0.000534
id1027640	id2008574	0.00178	0.000661	0.00316
id1027640	id3000014	0.00258	0.000518	0.00162
id1027642	id11001919	0.000262	0.000155	0.000229
id1027642	id11006160	1.93e-05	1.16e-05	5.08e-05
id1027642	id11011341	0.000967	0.00114	0.00126
id1027642	id12004548	0.000539	0.000467	0.00153
id1027642	id12007532	0.000623	0.000145	0.000547
id1027642	id2003153	0.000128	0.000128	0.000487
id1027642	id2008517	0.00061	0.00167	0.00575
id1027642	id2009569	0.000979	0.00133	0.00207
id1027642	id2010332	0.00281	0.000981	0.00332
id1027642	id2010541	0.000486	0.000293	0.000847
id1027642	id2011727	0.000338	0.000297	0.00117
id1027642	id2013074	0.000736	0.000632	0.00122
id1027642	id3002485	0.000118	5.26e-05	0.000154
id1027642	id3014722	9.92e-05	0.000259	0.000354
id1027642	id4000209	3.33e-05	2.74e-06	3.82e-05
id1027642	id4004005	0.000426	0.000122	0.0002
id1027642	id5000447	1.97e-05	6.21e-06	2.12e-05
id1027642	id5000501	0.000563	0.000484	0.00148
id1027642	id5002134	0.000387	0.000352	0.000671
id1027642	id5003807	0.000897	0.000642	0.00115
id1027642	id6002930	0.00013	6.09e-05	0.000212
id1027642	id6006753	6.28e-05	6.72e-05	0.000157
id1027642	id6009457	0.00129	0.000563	0.00274
id1027642	id6012706	9.47e-05	9.85e-06	4.12e-05
id1027642	id6015231	0.000326	8.24e-05	0.000196
id1027642	id7002433	0.00135	0.000598	0.000623
id1027642	id7003443	0.000483	0.000301	0.000964
id1027642	ud11001833	0.000107	7.03e-05	0.00011
id1027642	ud12000916	0.000933	0.000432	0.001
id1027642	ud2001743	0.000127	0.000231	0.000505
id1027642	ud5000957	7.96e-05	4.56e-05	0.000123
id1027642	ud6000066	0.000773	0.000623	0.0012
id1027642	ud7001994	0.000552	0.000256	0.000747
id1027642	ud9000881	0.00068	0.000424	0.000838
id1027642	wd11000494	0.000557	0.000124	0.000171
id1027732	id3018534	0.00451	0.000799	0.00236
id1028176	id11000314	0.00522	8.61e-05	0.000152
id1028176	id2007458	0.00261	0.0012	0.000885
id1028176	id2008517	0.000742	0.0241	0.0239
id1028176	id3009022	4.23e-05	8.86e-05	6.42e-05
id1028176	id4001968	0.000138	2.59e-05	0.00025
id1028176	id9004722	1.08e-05	0.000169	6.91e-05
id1028356	id3018232	0.00113	0.000641	0.00153
id1028504	id11008538	0.00125	0.000891	0.00318
id1028504	id2001574	0.0104	0.000218	0.000842
id1028504	id3000421	0.00021	0.000137	0.000258
id1028504	id4007595	0.0029	0.000864	0.00429
id1028554	id11011535	0.000145	1	1
id11000314	id11001086	0.000734	0.00031	0.000457
id11000314	id11008716	0.000775	0.00275	0.00405
id11000314	id11009464	0.000528	0.00463	0.0042
id11000314	id12003626	0.000415	0.00589	0.00341
id11000314	id12008642	0.0116	0.000705	0.00111
id11000314	id12010106	0.00032	0.000212	0.000344
id11000314	id2008517	0.000101	0.0133	0.00802
id11000314	id2010319	0.00095	0.000757	0.000917
id11000314	id2010974	0.65	0.000412	0.000667
id11000314	id3018576	0.0012	0.000543	0.000844
id11000314	id4000767	0.00012	0.000143	0.000239
id11000314	id4007990	0.000689	0.0021	0.00165
id11000314	id4010673	0.000846	0.00294	0.00144
id11000314	id5007974	0.000145	0.00291	0.00321
id11000314	id5015048	0.000365	0.00235	0.00204
id11000314	id6001333	0.000675	0.0047	0.00637
id11000314	id7003858	0.000192	0.0038	0.00368
id11000314	id7004422	0.0163	0.000678	0.000994
id11000314	id8001212	0.000306	0.00529	0.00237
id11000314	id8001958	0.000413	0.000418	0.00075
id11000314	id8004593	0.00141	0.000497	0.000694
id11000314	id8004698	0.00018	0.000271	0.000402
id11000314	id8005215	0.0155	0.000425	0.000702
id11000314	id8006944	0.00024	0.000238	0.000463
id11000314	id9004722	0.000157	0.00152	0.0036
id11000314	ud4001680	0.000806	0.000302	0.000839
id11000314	wd9001475	0.00017	0.00167	0.00111
id11000384	id12009869	0.000523	0.000408	0.001
id11000384	id6003372	6.67e-05	8.96e-05	0.000199
id11000384	id6008546	6.48e-05	5.58e-05	7.9e-05
id11000384	ud12000265	0.000428	0.000716	0.00062
id11000824	id12002362	0.00056	0.00136	0.00109
id11000824	id12004584	0.00878	0.00273	0.000537
id11000824	id12005652	0.000126	7.17e-05	0.000113
id11000824	id2004668	0.000442	0.00158	0.00179
id11000824	id2012923	0.000489	0.00122	0.00147
id11000824	id4002447	0.0132	0.00281	0.000983
id11000824	id6000534	0.00342	0.000977	0.00091
id11000824	id6009226	0.000949	0.00178	0.00165
id11000824	id6016667	0.000344	4.65e-05	6.25e-05
id11000824	id7005926	0.000406	0.000259	0.00107
id11000827	id11003534	0.00111	0.000697	0.00191
id11000827	id12009383	0.000781	0.00125	0.00239
id11001023	id11005869	0.00342	0.000557	0.00415
id11001023	id3009022	0.000139	9.53e-05	0.000537
id11001023	id4000354	0.0751	0.000381	0.000562
id11001023	id4001198	0.00152	0.000891	0.00179
id11001023	id6011452	0.00158	0.0022	0.000917
id11001023	id9001039	0.00134	0.000559	0.000428
id11001023	ud2001743	0.000776	0.307	0.248
id11001086	id9005712	0.000936	0.00222	0.00445
id11001161	id11002394	0.000888	0.00255	0.00424
id11001161	id12005714	0.000167	0.000541	0.0014
id11001161	id12007214	0.000299	0.000381	0.000986
id11001161	id12008122	0.000739	0.000752	0.00165
id11001161	id2004977	0.000921	0.0302	0.0242
id11001161	id2008517	0.000661	1	1
id11001161	id4001244	0.00125	0.000789	0.00487
id11001161	id4001466	0.000922	0.00159	0.00257
id11001161	id4006690	0.000457	0.00105	0.00294
id11001161	id6000534	0.000466	0.00411	0.0072
id11001161	id6003539	0.000594	0.000986	0.00202
id11001161	id7005551	0.000434	0.000495	0.00133
id11001161	id8005231	0.000113	9.07e-05	0.000755
id11001161	id9002707	0.000281	0.000471	0.00207
id11001161	id9005956	0.000749	0.00281	0.00609
id11001161	ud5000331	0.000763	0.00489	0.00461
id11001161	wd1001876	0.000871	0.00111	0.00418
id11001264	id11005869	0.000907	0.00131	0.00408
id11001264	id3002485	6.57e-05	6.09e-05	0.000106
id11001264	id6016824	0.00128	0.000147	0.00132
id11001373	id11010975	0.00205	0.000859	0.00491
id11001373	id12003001	0.000579	0.00022	0.00044
id11001373	id2010605	0.00244	0.000762	0.00248
id11001373	id3011972	0.000106	5.65e-05	0.000504
id11001373	id4011628	2.17e-05	0.000196	0.000364
id11001373	id8002668	0.000902	0.00078	0.00143
id11001373	id9002707	0.00079	0.00101	0.000925
id11001373	ud7001352	0.00119	0.000342	0.00172
id11001494	id12007214	0.000611	0.000657	0.00169
id11001494	id2001549	0.00067	0.0345	0.0695
id11001494	id8002218	0.0086	0.000687	0.00143
id11001494	id9004722	0.000265	0.000834	0.00308
id11001494	ud5000331	8.56e-05	0.000115	0.000488
id11001494	wd4002655	0.00155	0.000538	0.000772
id11001716	wd10000774	0.00046	0.00064	0.000963
id11001919	id11003120	0.0011	0.000625	0.00124
id11001919	id12008642	0.00055	0.00103	0.00128
id11001919	id2008517	0.000809	0.00349	0.00453
id11001919	id3017291	0.00212	0.000585	0.00207
id11001919	id6015231	0.00358	9.08e-05	0.000147
id11001919	id7001680	0.000447	0.000663	0.00157
id11001919	id8004698	0.000394	0.000293	0.00102
id11001975	id12000389	0.000578	0.00145	0.00647
id11001975	id5015048	0.000669	0.000436	0.00121
id11001975	id6002571	0.000737	0.000471	0.000617
id11001975	id6005490	0.000878	0.000115	0.000144
id11001975	id9001039	0.00134	0.000319	0.00046
id11001975	id9004722	0.000685	0.0004	0.000276
id11001975	ud10000231	0.000945	0.00141	0.00133
id11002134	id12010129	0.000526	0.000158	0.000496
id11002134	id2010265	0.00274	0.000837	0.00586
id11002134	id3000014	0.000167	4.13e-05	0.000201
id11002134	ud6000224	0.000725	0.00121	0.000936
id11002137	id6007198	0.000344	0.000263	0.000881
id11002142	id11008538	0.0016	0.000971	0.00404
id11002142	id2010390	0.00191	0.000861	0.00584
id11002180	id12003626	0.00247	0.00113	0.000439
id11002180	id7000897	0.00258	0.000938	0.00172
id11002180	wd9001475	0.000911	0.000682	0.000596
id11002369	id12003060	0.00036	0.000587	0.000967
id11002394	id12008144	0.000382	0.000692	0.000733
id11002394	id2000635	0.00445	0.000991	0.000732
id11002394	id2016154	8.69e-05	0.000536	0.000779
id11002394	id3013447	0.000235	0.00222	0.00369
id11002394	id4000209	0.000563	0.00341	0.00312
id11002394	id4001101	0.000527	0.00296	0.00537
id11002394	id4001243	0.000614	0.00191	0.00752
id11002394	id4008092	7.91e-05	0.000754	0.00152
id11002394	id5000482	0.000182	0.000189	0.000566
id11002394	id5014460	0.000838	0.024	0.0257
id11002394	id6002956	0.000111	0.00128	0.00583
id11002394	id6015132	0.000419	0.00558	0.00882
id11002394	id8007655	0.000599	0.00236	0.00325
id11002394	id9004722	0.000541	0.00517	0.00837
id11002394	ud6000233	0.000504	0.0218	0.0438
id11002394	ud6001330	8.42e-05	0.000671	0.000965
id11002394	wd7002216	0.045	0.00071	0.000619
id11002394	wd8003271	0.0051	0.000602	0.000314
id11002437	id3009463	0.00154	0.000966	0.00214
id11002437	id5007974	0.00016	0.000346	0.000603
id11002437	id6012675	0.00071	0.00144	0.00267
id11002437	id6016667	0.00145	0.000514	0.00145
id11002437	id8001706	0.00103	0.000626	0.00164
id11002437	ud1001580	0.000816	0.00144	0.00129
id11002767	id2012373	0.000142	0.187	0.305
id11002767	id3012912	0.000835	1	1
id11002767	id4000980	0.00479	0.000974	0.00208
id11002767	id5007974	0.0026	0.000321	0.000804
id11002767	id8004698	0.00299	0.000621	0.00132
id11002767	ud10000231	0.00746	0.000358	0.000725
id11002773	id4005835	0.00129	0.000644	0.00264
id11002773	ud6000233	0.000214	0.00061	0.00156
id11002781	id11008780	0.00082	0.00411	0.00465
id11002781	id2002399	0.000223	0.000387	0.00206
id11002781	id2007554	6.3e-05	0.000146	0.000652
id11002781	id3001107	0.000316	0.00134	0.00331
id11002781	id3009022	0.00087	0.00122	0.00319
id11002781	id5002601	0.000242	0.000485	0.00185
id11002781	id6003161	0.00114	0.000911	0.00355
id11002781	id6003420	0.00246	0.000577	0.00237
id11002781	id9007850	0.000557	0.00237	0.0035
id11002781	ud2001743	0.000556	1	1
id11002781	ud5000325	0.00053	1	1
id11002805	id3017311	7.47e-05	0.000164	0.000232
id11002805	id5007589	0.00115	0.00025	0.00172
id11002829	id4002447	0.00393	0.000725	0.00812
id11002829	id9005712	0.0854	0.000422	0.0016
id11002941	id2010160	0.000119	0.000132	0.00113
id11002941	id3013447	0.00152	0.000906	0.00229
id11002941	id6004236	0.000419	0.000317	0.000559
id11002941	id6011302	0.000224	4.29e-05	0.000143
id11002941	id6011452	7.23e-05	0.000145	5.4e-05
id11002972	id8000831	0.000171	0.000155	0.000437
id11003120	id11009197	0.000311	0.000225	0.000304
id11003120	id4001092	0.000835	0.00432	0.00745
id11003120	id6010788	0.000263	0.000336	0.000756
id11003120	id7001680	0.000776	0.0189	0.0162
id11003120	id7003443	0.0133	0.0006	0.000844
id11003120	id9001565	0.00112	0.000323	0.000279
id11003120	ud5000325	6.23e-05	1	1
id11003539	id12000389	0.000534	0.00108	0.00195
id11003539	id2001549	0.000983	0.0153	0.043
id11003539	id2010969	0.00112	0.00165	0.000923
id11003539	id4006576	0.000639	0.000326	0.00145
id11003539	id4006672	0.000569	0.000431	0.000637
id11003539	id5006409	0.00265	0.00219	0.000944
id11003539	id7005551	0.00157	0.000667	0.00109
id11003539	id9002707	0.000641	0.000467	0.000703
id11003651	id11009307	7.04e-05	6.81e-05	0.000182
id11003967	id4001198	0.000333	0.000308	0.000549
id11003967	id5000482	0.000714	0.00146	0.00239
id11004137	id2008517	0.00173	0.000331	0.000292
id11004137	id3012562	0.00198	0.000771	0.00355
id11004137	id4000767	0.000486	0.000408	0.00272
id11004137	id4006184	0.000663	0.00039	0.00105
id11004137	id4006672	0.000685	0.000433	0.00122
id11004137	ud3001009	0.00138	0.000838	0.00268
id11004137	ud7001208	0.00134	0.000729	0.00165
id11004731	id12003626	0.00048	0.00714	0.00242
id11004731	id12004180	0.000684	0.00111	0.0014
id11004731	id2000530	0.000839	0.000769	0.000722
id11004731	id3008127	0.000274	0.000448	0.000425
id11004731	id5001182	0.00134	0.000692	0.00163
id11004731	id5015048	0.000757	0.00131	0.0012
id11004731	id6001105	0.000143	0.000107	0.000179
id11004731	id6003575	0.000942	0.000642	0.0018
id11004731	id8001212	0.00661	0.000539	0.000326
id11004731	ud12001113	0.000624	0.000385	0.00111
id11004731	ud2001743	0.000736	0.0203	0.0207
id11004739	id8000831	0.0013	0.000603	0.00191
id11004784	id11007963	0.000851	0.00118	0.000837
id11004784	ud3000042	0.00184	0.000631	0.00444
id11004960	id11008538	0.000865	0.000676	0.00177
id11004960	id11010409	0.000224	0.000147	0.000122
id11004960	id11011373	0.000978	0.00149	0.00138
id11004960	id12001984	0.000305	0.000249	0.000239
id11004960	id3000421	0.000614	0.000569	0.00132
id11004960	id8002284	0.00114	0.000575	0.00258
id11005447	id11007372	0.000375	0.000188	0.000251
id11005447	id11010817	0.000696	0.000405	0.00129
id11005447	id3013447	0.000237	0.000458	0.000202
id11005447	id6006868	0.000491	0.00147	0.00198
id11005447	id6007277	0.000876	0.002	0.00385
id11005447	id8002076	0.000899	0.000371	0.000995
id11005447	id8004698	0.000792	0.000572	0.000692
id11005447	id9004722	0.000314	0.00024	0.000369
id11005447	ud3000719	0.00125	0.00071	0.00174
id11005463	id11009452	0.000103	0.000136	0.000195
id11005463	id11010269	0.000813	0.00114	0.00195
id11005463	id3005082	0.00088	0.0028	0.00194
id11005463	id4006576	0.000288	0.000265	0.000352
id11005463	id4010399	0.000689	0.000629	0.00135
id11005463	wd10000774	2.89e-05	2.65e-05	0.000113
id11005869	id11010342	0.000759	0.000794	0.000934
id11005869	id11011169	0.000761	0.00135	0.00209
id11005869	id12010129	0.0124	0.000721	0.00372
id11005869	id3000014	0.000119	0.000579	0.00101
id11005869	id3005318	1.74e-05	1.24e-05	3.37e-05
id11005935	id12007601	0.000399	0.00196	0.00422
id11005935	id6016129	0.000525	0.0127	0.0289
id11005935	id8005815	0.000696	0.00281	0.00375
id11005940	id2010176	0.000757	0.000301	0.00222
id11005940	id2011302	0.00502	0.00109	0.000733
id11005940	id3011074	0.00156	0.000657	0.00404
id11005947	id11010816	0.000673	0.000383	0.00173
id11005947	id2009715	0.00118	0.000465	0.00351
id11006038	id11011061	0.000957	0.000344	0.000906
id11006038	id12006348	3.03e-05	4.5e-05	3.02e-05
id11006038	id4000980	0.000125	0.000612	0.000815
id11006038	id4001394	0.000397	0.000602	0.00073
id11006038	id9001825	0.000386	0.000986	0.00111
id11006038	id9003625	0.000693	0.000434	0.00109
id11006160	id2001549	0.000255	0.0102	0.00843
id11006160	id2008517	0.000315	0.00716	0.01
id11006160	id2016265	0.000166	0.00556	0.0113
id11006160	id3002485	6.79e-05	5.85e-06	1.91e-05
id11006160	id3015622	0.000781	0.00109	0.00336
id11006160	id4002447	0.000631	0.00194	0.00639
id11006160	id6003372	0.00112	0.000489	0.00139
id11006160	id6011452	0.00044	0.00107	0.000315
id11006164	id12005794	0.000217	5.04e-05	0.000194
id11006164	id12008642	0.00123	0.000574	0.00399
id11006164	id3002485	0.00145	0.000887	0.00151
id11006164	id5008096	0.00316	0.000863	0.00333
id11006164	id6011457	0.000839	0.000149	0.000853
id11006164	id7000897	0.000295	0.00105	0.000504
id11006164	id7001680	0.000332	0.000366	0.0019
id11006164	id8004698	0.00325	0.000527	0.000621
id11006164	id9005712	0.000295	5.86e-05	0.000314
id11006373	id11010975	0.000647	0.000402	0.000844
id11006373	id2010221	0.00349	0.000889	0.0036
id11006373	id2010332	0.000953	0.000535	0.00196
id11006373	id8006944	4.26e-05	3.78e-05	0.000191
id11006373	ud7001348	0.000254	0.00299	0.00622
id11006397	id3007436	0.000733	0.000975	0.00238
id11006397	id4000354	0.000327	0.000413	0.00115
id11006405	id12008642	0.00435	0.000412	0.000615
id11006405	id12010106	0.000317	0.00031	0.000464
id11006405	id2004921	0.000471	0.000615	0.000645
id11006405	id2009569	0.000892	0.000692	0.00187
id11006405	id4006576	0.0201	0.000387	0.00111
id11006405	id6014700	0.000593	0.00151	0.000886
id11006405	id7001680	0.000716	0.000361	0.000415
id11006405	id7003443	0.00327	0.000204	0.000226
id11006405	id8004698	8.87e-05	0.000125	0.000154
id11006405	id9004722	0.00169	0.000604	0.00105
id11006405	wd4002816	0.00223	0.000172	0.000219
id11006633	id3009342	0.000716	0.00625	0.00217
id11006819	id4006939	0.00138	0.00038	0.0017
id11006819	id6004428	0.000675	0.0024	0.00497
id11006819	ud5000325	0.000345	0.158	0.103
id11006931	id12004548	0.000162	0.000499	0.000708
id11007232	id6001960	0.00141	0.000545	0.000976
id11007232	id6010788	0.000452	0.000171	0.000545
id11007372	id11009898	0.00257	0.000481	0.00209
id11007372	id2001699	0.00201	0.000879	0.00215
id11007372	id3013447	0.00121	0.000756	0.00241
id11007372	id4002349	0.0013	0.000672	0.00217
id11007372	id5006409	0.000133	6.71e-05	9.23e-05
id11007372	id5014460	9.82e-05	0.00013	0.000269
id11007372	id6015132	0.000599	0.000716	0.00148
id11007372	id8005231	0.000664	0.000867	0.00348
id11007372	id9001039	0.00153	0.000912	0.00261
id11007372	id9001748	0.000237	0.000117	0.000807
id11007372	ud4000142	0.000206	0.000138	0.000436
id11007420	id3005082	0.00127	0.000896	0.00226
id11007727	id11009197	0.000244	0.000309	0.000348
id11007727	id7000897	0.000667	0.000821	0.002
id11007727	wd8002797	0.00178	0.000717	0.00325
id11007933	id2010969	0.000209	0.000286	0.000511
id11007933	id7006023	0.000646	0.000608	0.000878
id11007936	id6011452	0.00032	0.000255	0.000198
id11007963	id12007532	0.00161	0.00132	0.000507
id11007963	id12007609	0.000584	0.000703	0.000759
id11007963	id2007095	0.000913	0.00229	0.00111
id11007963	id2010992	0.00106	0.000407	0.000604
id11007963	id3008104	0.000209	0.000411	0.000219
id11008007	id3011075	5.3e-05	3.26e-05	0.000208
id11008007	id3011078	0.000626	0.000114	0.000352
id11008009	id4011022	0.00119	0.000349	0.000599
id11008009	id6005490	0.000198	0.000132	0.000144
id11008098	id3002485	0.000434	0.000323	0.000953
id11008100	id2012831	0.000776	0.00418	0.00112
id11008103	id5007974	0.000656	0.00482	0.00608
id11008135	id12005874	0.000975	0.000439	0.00202
id11008135	id2016515	0.00115	0.00102	0.000989
id11008321	id12003314	0.000878	0.000259	0.0019
id11008321	id12003444	0.000528	0.000561	0.00201
id11008321	id2003226	0.000247	0.000289	0.000707
id11008321	id2016184	0.000488	0.00242	0.0056
id11008321	id5004796	0.000729	0.000257	0.000695
id11008322	id11009197	5.29e-05	0.000182	0.000157
id11008322	ud10000307	0.000247	0.000279	0.000543
id11008374	id2009420	0.000748	0.000582	0.0012
id11008374	id6003000	0.000444	0.000346	0.00115
id11008432	id4000927	0.000183	0.000184	0.000883
id11008432	id7006095	0.00016	0.000287	0.00157
id11008434	id9004722	0.000901	0.00201	0.00104
id11008487	id5007974	7.12e-05	0.000203	0.000216
id11008487	id5014460	0.00314	0.000556	0.00116
id11008487	id6004867	0.000496	0.000445	0.000746
id11008487	id8001041	0.000979	0.000385	0.00125
id11008487	id8002106	0.00957	0.000969	0.00495
id11008487	id8006704	0.000676	0.000434	0.00149
id11008487	wd1000197	0.000694	0.00428	0.00469
id11008538	id11009452	0.000908	0.000585	0.00132
id11008538	id11010360	8.82e-05	7.85e-05	0.000272
id11008538	id11010816	0.00132	0.000515	0.00109
id11008538	id11010975	0.00177	0.000833	0.00316
id11008538	id11011499	0.000817	0.000401	0.00106
id11008538	id12007226	0.000535	0.000267	0.000994
id11008538	id12009769	0.000603	0.000815	0.00182
id11008538	id12010129	0.000267	0.000292	0.000882
id11008538	id2003226	0.000396	0.000687	0.00228
id11008538	id2004552	0.000162	0.000335	0.000755
id11008538	id2009538	3.61e-05	3.45e-05	0.000106
id11008538	id2010178	0.000553	0.000479	0.00135
id11008538	id2010240	0.000997	0.000984	0.00198
id11008538	id2010265	0.000147	4.22e-05	0.000238
id11008538	id2010593	0.000228	0.000242	0.000592
id11008538	id2010976	0.000428	5.14e-05	0.000131
id11008538	id2014672	0.000316	0.000513	0.00148
id11008538	id2016515	0.000403	0.000395	0.000628
id11008538	id3000014	0.000891	0.000618	0.00315
id11008538	id3001390	0.00164	0.000738	0.00484
id11008538	id3002787	0.000298	0.000321	0.00111
id11008538	id3011075	0.00107	0.000257	0.00127
id11008538	id4012156	0.000532	0.000972	0.00127
id11008538	id5006990	0.000502	0.000942	0.00171
id11008538	id6003693	0.000637	0.000863	0.00157
id11008538	id6005672	0.000362	0.000279	0.00121
id11008538	id6010983	0.000239	0.000403	0.00111
id11008538	id6015035	0.00028	0.000417	0.000545
id11008538	id6015132	0.00111	0.000464	0.00153
id11008538	id8000610	0.00145	0.000825	0.00211
id11008538	id8001738	4.16e-05	2.64e-05	0.0001
id11008538	id8005231	0.00137	0.000553	0.00123
id11008538	id8005378	0.00067	0.0001	0.000704
id11008538	id9006585	0.000848	0.00193	0.00253
id11008538	id9007236	0.000821	0.00171	0.00304
id11008538	ud10000231	0.000919	0.000674	0.00179
id11008538	ud4000205	0.00073	0.000665	0.00136
id11008538	ud7001352	0.000349	0.000208	0.000645
id11008538	ud8000156	0.0013	0.000821	0.00333
id11008571	id5004222	0.000884	0.00137	0.00202
id11008571	id8000831	0.000911	0.000554	0.00065
id11008699	id5000077	0.00115	0.00059	0.00208
id11008699	ud8000190	0.00174	0.000326	0.00234
id11008716	id4002010	0.000876	0.000556	0.0019
id11008727	id11010893	0.00134	0.00082	0.00231
id11008727	id11011136	0.00191	0.0003	0.00049
id11008727	id12002574	3.41e-06	1.24e-06	1.29e-05
id11008727	id2001432	0.000127	4.5e-05	0.000224
id11008727	id2003226	0.000189	0.000293	0.000848
id11008727	id2008517	0.00107	0.000326	0.000559
id11008727	id3000014	0.000302	0.000148	0.000993
id11008727	id3017843	0.000588	0.000564	0.00133
id11008727	id3018362	0.000197	0.000227	0.000275
id11008727	id4002725	0.000238	0.000217	0.000748
id11008727	id4004965	0.000483	0.000995	0.00116
id11008727	id4010985	0.000244	0.000302	0.000394
id11008727	id4011190	0.000878	0.00136	0.00195
id11008727	id5007974	0.000588	0.00303	0.00365
id11008727	id5012291	0.000392	2.19e-05	9.09e-05
id11008727	id6001333	0.00097	0.000492	0.00129
id11008727	id6008546	0.000233	0.000173	0.000509
id11008727	id6011710	0.000447	0.000674	0.000738
id11008727	id6012706	0.000221	0.000169	0.000431
id11008727	id7000897	0.000549	0.000361	0.000943
id11008727	id7003207	9.96e-05	8.76e-05	0.000211
id11008727	id8000229	0.0014	0.000475	0.00255
id11008727	id8002076	0.000291	9.97e-05	0.000631
id11008727	id8002106	0.00038	0.00015	0.00054
id11008727	id8006944	0.000229	0.000321	0.000477
id11008727	ud4001680	0.000572	0.00035	0.00119
id11008727	ud6000403	0.000717	0.000745	0.00154
id11008748	id6010788	0.00117	0.000839	0.00254
id11008772	id2013412	0.00103	0.00127	0.000967
id11008772	id7004596	0.000894	0.000547	0.00143
id11008780	id3011115	0.000824	0.00165	0.00371
id11008780	ud12000518	0.0004	0.000721	0.00173
id11008797	id5006392	0.000697	0.000464	0.00174
id11008797	id5007589	0.00108	0.00174	0.00068
id11008849	id2013074	0.000174	0.000279	0.0005
id11008849	ud6000233	0.871	0.000384	0.000682
id11008915	id11009197	0.000853	0.000969	0.00204
id11008915	id2001234	0.000227	0.000137	0.000368
id11008915	id2002978	0.00422	0.000753	0.00463
id11008915	id4009650	0.00226	0.000875	0.0035
id11008915	id5006409	0.000285	0.000274	0.000291
id11008915	id7001680	0.000568	0.000391	0.000547
id11008915	id8001041	3.43e-05	1.38e-05	5.03e-05
id11008915	ud2000905	0.000506	0.000136	0.000781
id11008951	id2013074	0.000445	0.000404	0.000695
id11008951	id6011457	0.000125	6.71e-05	0.000136
id11008951	id7004422	0.0104	0.000976	0.00129
id11008951	wd4000011	0.000341	0.000498	0.00034
id11008973	id2004977	5.73e-05	0.000387	0.00253
id11008973	ud12000518	0.000672	0.00141	0.00206
id11008977	id12008144	0.00187	0.000275	0.000315
id11008977	id12008203	0.00438	0.000358	0.000717
id11008977	id4010399	0.00955	0.000237	0.00144
id11008977	id8007655	0.000226	0.000146	0.000636
id11009005	id2002020	0.000529	0.00191	0.00568
id11009005	id3011073	0.00163	0.000501	0.00255
id11009005	ud3000719	0.000836	0.000353	0.000964
id11009025	id3011073	0.00264	0.000795	0.00399
id11009025	id3011075	0.00049	0.000313	0.00142
id11009073	id4001968	0.00134	0.000543	0.00366
id11009073	ud10000307	0.0022	0.000559	0.00258
id11009073	ud12000518	0.000523	0.000247	0.00184
id11009117	id8001832	0.000909	0.00142	0.000883
id11009117	id9004722	2.8e-06	5.08e-06	1.04e-05
id11009167	id2001745	0.00137	0.00058	0.000741
id11009167	id4010691	0.00162	0.000895	0.00256
id11009167	ud7001994	0.000285	0.000698	0.00154
id11009197	id11010817	0.00237	0.000281	0.00221
id11009197	id12001946	0.00014	4.83e-07	1.47e-06
id11009197	id2003153	0.000184	8.92e-05	0.000124
id11009197	id2003345	0.00207	0.000845	0.0052
id11009197	id2009218	0.000828	0.00104	0.00144
id11009197	id2010178	0.000466	0.000859	0.00206
id11009197	id2010403	4.9e-05	4.1e-05	5.56e-05
id11009197	id3002485	2.73e-05	0.000168	6.65e-05
id11009197	id3004454	6.45e-05	5.65e-05	0.000392
id11009197	id3017794	0.000601	0.000801	0.00108
id11009197	id4001221	0.000771	0.000526	0.000961
id11009197	id4006504	0.0173	0.000724	0.00473
id11009197	id4011022	0.000973	0.00166	0.00162
id11009197	id4011542	0.000416	0.00303	0.0006
id11009197	id5000077	0.00125	0.000938	0.00368
id11009197	id5008813	6.31e-05	5.25e-05	6.46e-05
id11009197	id5013951	0.000146	0.000213	0.000171
id11009197	id6001333	0.000237	0.000551	0.000312
id11009197	id6003372	0.00096	0.00129	0.00176
id11009197	id6006538	0.0115	0.000568	0.00181
id11009197	id6006753	0.00116	0.000394	0.00237
id11009197	id6010983	0.000129	0.000366	6.68e-05
id11009197	id6011302	0.00117	0.000203	0.000586
id11009197	id6015231	0.000186	0.00149	0.000405
id11009197	id6016997	0.000436	0.000708	0.00198
id11009197	id7000668	0.000895	0.000592	0.000693
id11009197	id7005551	3.56e-05	4.06e-05	5.92e-05
id11009197	id8005231	0.000226	0.000491	0.00135
id11009197	id9002705	0.000265	2.25e-05	0.000232
id11009197	ud11001282	0.00194	0.000736	0.00514
id11009197	ud7001348	0.00793	0.000144	0.00015
id11009197	wd11001997	0.000835	0.00086	0.00225
id11009197	wd8000422	0.000692	0.0011	0.00184
id11009201	id11010709	0.000786	0.000285	0.000549
id11009201	id2010974	0.00138	0.00108	0.000888
id11009201	id8001832	8.82e-05	3.83e-05	0.000107
id11009201	id9004722	5.01e-08	1.06e-07	8.85e-08
id11009201	ud10000806	0.00104	0.00121	0.000578
id11009230	id11010709	0.000384	0.000473	0.000782
id11009230	id8007225	0.000747	0.000385	0.000478
id11009307	id2008517	0.000974	0.0061	0.00393
id11009307	id6004236	0.000519	0.00247	0.00399
id11009418	id5007974	0.00444	0.000635	0.000516
id11009447	id11011169	0.000925	0.00102	0.00105
id11009452	id12003626	0.000248	0.00013	0.000121
id11009452	id2011727	0.00126	0.000792	0.00174
id11009452	id5007974	0.00124	0.000446	0.000381
id11009452	id6005092	0.000529	0.000418	0.0014
id11009452	id7005590	0.000619	0.00217	0.00158
id11009452	ud5000835	0.00044	0.000583	0.00035
id11009452	ud7001211	0.000472	0.000216	0.000497
id11009464	id2010376	0.000713	0.00049	0.00142
id11009464	id4000354	0.000137	0.000169	5.41e-05
id11009464	id8007655	0.00041	0.000553	0.000237
id11009466	ud7001603	0.000785	0.000739	0.00218
id11009492	id8001212	0.00107	0.000597	0.00162
id11009492	id9004722	4.91e-06	2.91e-05	2.43e-05
id11009565	id11009858	0.000783	0.00156	0.00266
id11009565	ud6000233	4.71e-05	0.00105	0.00133
id11009726	id2003033	0.000215	7.3e-05	0.000179
id11009726	id6011302	0.00367	0.000527	0.00171
id11009858	id4011127	0.00167	0.000959	0.0031
id11009898	id2001549	2.22e-05	0.000331	0.000344
id11009932	id5001871	0.000337	0.00145	0.00145
id11009932	id9000002	0.00106	0.000808	0.00277
id11009932	id9004406	0.00072	0.000258	0.000937
id11009966	id3001101	0.00158	0.000413	0.00162
id11009966	id5007974	0.00318	5.32e-05	8.16e-05
id11009966	id6011727	0.000752	0.000891	0.00108
id11009966	id8000329	0.000384	0.000406	0.000337
id11010080	id6011827	0.000542	0.000441	0.000697
id11010080	ud12000518	0.000882	0.000723	0.00175
id11010095	id2009218	0.00082	0.000549	0.002
id11010114	id6016547	0.000374	0.00231	0.00367
id11010124	id6016547	0.0028	0.000242	0.000958
id11010214	id12005206	0.00941	0.000995	0.00237
id11010214	id4008092	0.000545	0.000792	0.000744
id11010214	id5002305	0.000567	0.000483	0.00152
id11010214	id5006409	0.000212	0.000257	0.000226
id11010229	id4008092	0.00046	0.002	0.000591
id11010229	ud6000233	0.000375	0.00189	0.00152
id11010269	id7005551	0.000687	0.00142	0.00156
id11010277	id11011535	0.000987	0.0394	0.0309
id11010277	id8006997	0.000215	0.000211	0.000531
id11010277	ud12001523	0.00123	0.000682	0.00281
id11010279	id6012706	0.00095	0.000529	0.000564
id11010291	id6015745	0.00138	0.000967	0.00191
id11010291	id9004722	3.92e-05	0.000247	0.000149
id11010291	ud6000233	0.000775	0.00619	0.00605
id11010305	id12007601	9.09e-05	5.28e-05	0.000275
id11010305	id2000917	0.0105	0.000428	0.000818
id11010305	id4004677	0.000153	0.000129	0.000295
id11010305	id6012706	0.000483	0.000179	0.000234
id11010305	id6013613	0.00104	0.000865	0.00176
id11010305	id7004884	0.000165	0.000394	0.000156
id11010305	id9004722	0.000214	4.53e-05	0.000117
id11010321	id12002594	0.000369	0.000206	0.000909
id11010323	id2008517	0.00038	0.0062	0.00637
id11010323	id2010319	4.56e-05	2.32e-05	5.1e-05
id11010323	id8004698	0.000159	8.1e-06	2.47e-05
id11010342	id5015048	0.0168	0.000907	0.00504
id11010342	ud9000363	0.000649	0.000549	0.000683
id11010349	id3005082	0.000342	0.000487	0.000333
id11010349	ud12000518	0.000628	0.000602	0.00136
id11010349	ud9000363	0.000946	0.00131	0.000733
id11010358	id3018573	0.001	0.000549	0.00142
id11010360	id2003153	0.136	0.000215	0.000365
id11010360	id2004921	0.000554	0.000408	0.000342
id11010360	id2014722	0.000962	0.000262	0.000664
id11010360	id4005210	0.000972	0.00216	0.00268
id11010360	id7003160	0.00124	0.000773	0.000728
id11010360	id8006944	0.0021	6.87e-05	0.000117
id11010400	id9001039	0.000575	0.00119	0.000653
id11010400	ud12000518	0.000772	0.000356	0.0024
id11010409	id12005270	0.00282	0.000759	0.00175
id11010409	id12008308	0.00086	0.000278	0.000732
id11010409	id2004552	0.00244	0.000817	0.00104
id11010409	id4000024	0.000899	0.00107	0.00128
id11010409	id5003785	0.00272	0.000383	0.000512
id11010409	id5013294	0.000862	0.000656	0.00142
id11010409	id6010983	0.00218	0.000903	0.0012
id11010409	id6011302	0.000307	0.00111	0.0008
id11010409	id6011361	0.000889	0.00123	0.000781
id11010409	id7005551	0.000283	0.000236	0.000334
id11010409	id8000610	3.69e-05	4.17e-05	0.000214
id11010409	id8004698	0.00818	0.00126	0.000893
id11010409	id8006810	0.000561	0.000544	0.00046
id11010409	id8006944	7.53e-05	3.5e-05	0.000148
id11010409	id9001633	5.65e-05	7.02e-05	7.98e-05
id11010409	id9004722	0.000368	0.000921	0.00286
id11010409	ud5000325	0.000701	0.093	0.0734
id11010409	ud6000233	0.000675	0.00238	0.00468
id11010483	id11010872	0.000869	0.000114	0.00053
id11010709	id2008517	0.000117	0.00325	0.00623
id11010709	ud7001348	0.0025	0.000668	0.00102
id11010816	id2003700	4.5e-05	1.93e-05	8.39e-05
id11010816	id2015172	0.00175	0.000629	0.00171
id11010816	id4010716	0.00183	0.000705	0.00272
id11010816	id4011293	0.00162	0.000592	0.00217
id11010816	id5013816	0.00224	0.000704	0.00453
id11010816	id6003693	0.000628	0.000404	0.000554
id11010816	id7006074	0.00254	0.000998	0.00428
id11010816	ud11000990	0.00109	0.000874	0.00149
id11010816	ud7001994	0.000235	0.00451	0.00798
id11010816	wd7000143	0.00153	0.000684	0.00185
id11010817	id2012492	0.000562	0.000365	0.00141
id11010817	id3018360	0.00279	0.000743	0.00353
id11010817	id5008096	0.00164	0.000735	0.00194
id11010817	id6004236	0.000539	0.000649	0.00106
id11010817	id7003437	0.00199	0.000967	0.00212
id11010817	id8001706	0.00223	0.000571	0.00202
id11010817	id9007356	0.00156	0.000406	0.00215
id11010817	ud8001295	0.000143	0.00011	0.000269
id11010822	id4001092	0.000629	0.000701	0.00124
id11010822	id5013951	0.00285	0.000629	0.00284
id11010846	id9001565	0.00495	0.000441	0.00395
id11010871	ud3000719	0.000958	0.000236	0.0013
id11010872	id11011449	0.000686	0.000285	0.000782
id11010872	id12008144	0.000597	0.00144	0.00162
id11010872	id3003813	0.000338	0.00152	0.00098
id11010872	id4004261	0.000713	0.000384	0.00121
id11010872	id7001680	0.000497	0.000511	0.00183
id11010872	id8004698	0.000813	0.000892	0.00209
id11010872	ud10000231	0.000257	0.000183	0.000592
id11010872	ud5000835	0.00178	0.000191	0.000281
id11010872	wd11002143	0.0153	0.000471	0.000919
id11010893	id7006092	0.012	0.000839	0.00056
id11010893	id8006944	0.000313	0.000101	0.000319
id11010900	id2001421	0.00192	0.000698	0.00159
id11010900	id2008517	0.247	0.000294	0.0014
id11010900	id5015048	8.85e-05	2.87e-05	0.000165
id11010900	id6011452	0.00133	0.00113	0.000695
id11010900	id8001738	0.000658	0.00165	0.00412
id11010900	id8007765	0.000803	0.00075	0.000917
id11010900	ud10000307	0.000332	0.000548	0.00109
id11010900	ud6000233	0.00246	0.000443	0.00102
id11010900	wd10000774	0.00044	0.000272	0.000657
id11010908	id4000024	0.000667	0.00612	0.00227
id11010952	id6016129	0.000284	0.00133	0.00579
id11010962	id12004584	0.000568	0.00133	0.00093
id11010962	id3012425	0.000912	0.000344	0.00574
id11010962	id6004428	0.000931	0.000368	0.00147
id11010962	ud12000518	0.000199	0.000197	0.000563
id11010975	id2002077	0.000288	0.000348	0.000866
id11010975	id2008517	9.09e-05	0.00297	0.00914
id11010975	ud11001030	5.35e-05	0.000141	0.000227
id11011009	id12007214	0.00281	0.000581	0.00297
id11011009	id5014910	0.000536	0.000508	0.00126
id11011009	id6015745	0.000766	0.000238	0.00223
id11011009	id9004722	0.000793	0.00646	0.00377
id11011009	ud5000325	0.000394	0.0476	0.0455
id11011021	id2001549	0.00051	0.0825	0.0363
id11011021	id2003345	0.000543	0.000939	0.00181
id11011021	id5001871	0.000891	0.00142	0.00208
id11011061	id6011452	0.00222	0.000937	0.000706
id11011110	id9003876	0.000691	0.000601	0.00192
id11011110	ud7001352	0.000631	0.000424	0.0024
id11011136	id3014722	0.0294	0.00159	0.000857
id11011136	id4005217	0.000302	0.000494	0.00124
id11011136	id6000856	0.000507	9.07e-05	0.000202
id11011136	id6014700	0.0137	0.000177	0.000192
id11011136	ud5000325	0.000163	1	1
id11011165	id2010836	0.00165	0.000656	0.00198
id11011165	id3018534	0.000727	0.00111	0.000632
id11011165	id5006409	0.00182	0.000744	0.00136
id11011165	id6011457	0.000833	0.00116	0.001
id11011169	id3002556	0.000886	0.000637	0.00166
id11011169	id4010308	0.00126	0.000884	0.00182
id11011169	id5003807	0.000871	0.00101	0.00215
id11011169	id5009050	0.00128	0.000611	0.00291
id11011169	id6003372	0.000909	0.0032	0.00799
id11011169	id6016616	0.00143	0.000711	0.00147
id11011169	id8001041	0.000753	0.000717	0.00207
id11011169	wd12002862	0.00096	0.000791	0.00161
id11011180	id12010106	0.000971	0.00159	0.00137
id11011180	id2016162	0.152	0.000559	0.000747
id11011180	id3002485	0.00558	0.000107	0.000149
id11011180	id4001092	0.000264	0.000466	0.00094
id11011180	id6003575	0.00153	0.000919	0.00155
id11011180	id8004989	0.000911	0.00109	0.00175
id11011180	id8006944	0.000937	0.00201	0.0016
id11011180	ud7001348	0.000127	0.000263	0.000302
id11011341	id4009662	0.000799	0.000735	0.00145
id11011341	id5001739	0.000632	0.000711	0.00261
id11011341	id6002956	0.000372	0.000123	0.000382
id11011341	id6010788	0.00117	0.000815	0.00149
id11011341	id9003596	9.13e-05	8.99e-05	0.000146
id11011341	ud5000325	0.000604	0.028	0.0663
id11011371	id5007974	0.00045	0.0017	0.00181
id11011395	id2008517	0.000261	0.00844	0.00515
id11011395	id5006392	6.96e-05	2.18e-05	6.32e-05
id11011395	id5007974	0.000267	0.0024	0.00168
id11011395	id6016824	0.00502	0.000661	0.00136
id11011395	wd9001475	0.00071	0.000342	0.00124
id11011449	id12005874	0.00119	0.000712	0.0023
id11011482	id5000447	0.000831	0.0204	0.0457
id11011482	id6005672	0.000239	0.000668	0.00152
id11011495	id6016547	0.000551	0.000801	0.000976
id11011535	id12001996	0.000548	0.00455	0.00704
id11011535	id2001745	0.000284	0.0183	0.0102
id11011535	id2010593	0.000843	0.00782	0.0148
id11011535	id2015679	0.000943	0.00527	0.0125
id11011535	id3017843	0.000412	0.00159	0.00618
id11011535	id4000734	0.00036	0.00306	0.00807
id11011535	id4006672	8.68e-05	0.00109	0.00146
id11011535	id4009189	0.00098	0.042	0.0656
id11011535	id4009710	0.000422	0.00654	0.0107
id11011535	id5010635	0.000292	0.00295	0.00238
id11011535	id5014460	0.000333	0.00422	0.00695
id11011535	id6004006	0.000588	1	1
id11011535	id6015132	0.000866	0.0152	0.0298
id11011535	id6016667	0.000855	0.00518	0.00816
id11011535	id6016879	0.000975	0.00826	0.0125
id11011535	id7004596	0.000141	1	1
id11011535	id8000168	0.000647	0.00821	0.00806
id11011535	id8003172	0.000109	0.000541	0.00124
id11011535	id8007225	0.000186	0.00454	0.00621
id11011535	id8007559	0.000118	0.0285	0.0218
id11011535	id9007473	0.000134	0.00743	0.00723
id11011535	ud10000806	0.000254	0.00346	0.00608
id11011535	ud11001030	0.000851	0.00848	0.00651
id11011535	ud2000432	0.000343	0.00388	0.0142
id11011535	ud8000156	9.63e-05	0.000732	0.00139
id11011535	wd10000774	0.000514	0.0104	0.0182
id11011535	wd7000143	0.000263	0.00645	0.00571
id11011685	id2003700	0.000342	0.000297	0.000274
id11011685	id3009022	0.00029	0.000135	0.000118
id11011685	id6003916	0.000254	1.47e-05	5.26e-05
id11011685	id6012152	0.000572	0.000943	0.00173
id11011685	id9001633	0.0021	9.45e-06	2.9e-05
id12000006	id12007214	0.00133	0.000718	0.00278
id12000006	id2010605	0.00156	0.000908	0.00563
id12000006	id8002218	0.00382	0.000818	0.00896
id12000075	id5000447	0.000816	0.000762	0.00201
id12000389	id12005206	0.0022	0.00095	0.00295
id12000389	id2003610	0.000739	0.00581	0.00624
id12000389	id2010836	0.0066	0.000513	0.000956
id12000389	id3005318	1.92e-05	0.000396	0.000717
id12000389	id4009650	0.000852	0.000179	0.000862
id12000389	id5013951	0.000803	0.000696	0.0015
id12000389	id7001730	0.000123	1.29e-05	8.88e-05
id12000389	id8005236	0.00109	0.00168	0.000717
id12000389	id8006200	0.000904	0.00727	0.00931
id12000389	wd7001838	0.00034	0.00433	0.00476
id12001752	id3005082	0.00126	0.000307	0.00275
id12001752	id3012234	0.000494	0.00165	0.00217
id12001946	id2010265	1.01e-05	1.57e-05	8.45e-05
id12001946	id8004698	0.00676	0.000686	0.000721
id12001996	id3008127	0.000804	0.000381	0.00168
id12002092	id5003807	0.000891	0.000365	0.000952
id12002092	id8001212	0.000391	7.86e-05	0.000264
id12002362	id5002442	0.00157	0.000558	0.00278
id12002396	id5006100	0.00211	0.000939	0.00259
id12002574	id12006562	0.000338	0.000107	0.000813
id12002574	id4007595	0.000273	0.000148	0.000306
id12002574	id4012156	0.000269	8.31e-05	0.000354
id12002574	ud11001343	0.000646	0.000279	0.0017
id12002574	ud4001697	0.000136	7.17e-05	0.000344
id12002594	id2000611	0.000677	0.00065	0.00187
id12002594	id2001699	0.000538	0.000396	0.000907
id12002594	id2012408	0.00163	0.000866	0.00794
id12002594	id4010688	0.00219	0.000585	0.00408
id12002594	id4011010	0.000728	0.000447	0.00147
id12002594	id4012093	0.0024	0.000921	0.00891
id12002616	id2010403	5.4e-05	1.15e-05	0.000256
id12002616	id3017313	0.00011	0.000122	0.00023
id12002616	id4001663	0.000236	0.000368	0.00051
id12002616	id6000857	0.00233	0.000596	0.00707
id12002726	id6003161	0.00073	0.000534	0.00167
id12002726	id8002284	0.000679	0.000359	0.000942
id12002743	id9001825	0.000913	0.00066	0.00143
id12002813	id3009022	0.000956	0.00149	0.00185
id12003001	id2001549	0.000884	0.13	0.0812
id12003001	id2012923	0.00547	0.000732	0.00193
id12003001	id5006409	0.0103	0.00107	0.000774
id12003001	id5014460	0.000258	0.000301	0.000586
id12003001	id6006539	2.37e-05	5.76e-06	8.44e-05
id12003001	id6010983	0.00237	0.000817	0.00127
id12003001	id6015132	0.000477	0.000376	0.0013
id12003001	id6016616	0.000517	0.00156	0.00147
id12003001	id8007149	0.041	0.000579	0.00256
id12003060	id2002020	0.000963	0.000336	0.000617
id12003060	id6003489	0.000493	0.00112	0.000792
id12003060	ud11001343	0.000804	0.000665	0.00157
id12003314	id6004236	0.000744	0.00101	0.00413
id12003314	id6006539	0.000648	0.000443	0.001
id12003368	id3009538	0.000694	0.000635	0.00138
id12003368	id4000647	0.00103	0.000493	0.000871
id12003368	id4011628	0.00106	0.000432	0.0017
id12003368	id5006409	0.000643	0.00049	0.000772
id12003368	id6016667	0.000225	0.000251	0.00036
id12003444	id4001198	0.0143	0.000373	0.00175
id12003626	id2004921	0.00086	4.97e-05	0.000105
id12003626	id3002485	7.23e-05	6.18e-06	2.14e-05
id12003626	id6000856	0.000997	0.000593	0.00285
id12003626	id6011302	0.0106	0.00071	0.000479
id12003626	ud11001282	0.00461	0.000832	0.00145
id12003835	id4001092	0.000796	0.000744	0.000972
id12003835	id6010788	0.000554	0.000377	0.000816
id12003835	id8004698	0.000192	0.000124	0.000208
id12003866	id12004298	0.00672	0.000786	0.00383
id12003968	id12006396	0.000776	0.000344	0.000899
id12003968	id2010097	0.000827	0.000907	0.00181
id12003968	ud5000835	0.000169	0.000115	0.000198
id12004180	id2005031	0.000377	0.000264	0.000657
id12004180	id7001680	0.000787	0.00187	0.00164
id12004238	id2008517	0.000531	0.0132	0.0172
id12004238	id5007974	7.36e-06	3.84e-05	4.93e-05
id12004238	ud5000835	0.00208	0.000691	0.00203
id12004298	id2010969	0.00209	0.00208	0.000999
id12004298	id7006023	0.00438	0.000686	0.00327
id12004298	id8004698	0.0249	0.000103	0.000131
id12004298	id9001081	0.000245	0.000227	0.000298
id12004548	id3000764	0.000438	0.000501	0.00164
id12004548	id3014722	0.000822	0.00105	0.0034
id12004548	id4008092	0.000184	0.000638	0.000956
id12004548	id4011628	0.000271	0.000794	0.00094
id12004548	id5001871	0.000247	0.000949	0.00501
id12004548	id5006409	0.000642	0.000899	0.00122
id12004548	ud7001029	0.000616	0.000413	0.0014
id12004584	id4005074	0.00185	0.000258	0.00108
id12004584	id5006409	0.000643	0.000501	0.0013
id12004584	wd1001876	0.00126	0.000508	0.00272
id12005106	id5013951	0.344	0.000412	0.00197
id12005129	id4000980	0.000186	0.000129	0.000558
id12005129	ud5000835	0.000175	0.000257	0.000175
id12005199	id8005231	0.000595	0.00178	0.00376
id12005206	id4000980	0.000272	0.00363	0.00836
id12005270	id5013951	0.0433	0.000896	0.00161
id12005270	ud6000224	0.00109	0.000836	0.00137
id12005350	id2001745	0.000836	0.000512	0.000666
id12005350	id7002838	0.000344	0.000413	0.00175
id12005350	wd2002230	0.000403	0.000608	0.00145
id12005504	id8006944	0.000852	0.0017	0.00108
id12005652	id4000354	0.00214	0.000864	0.00138
id12005714	id6006539	0.00158	0.000783	0.00299
id12005714	id9005422	0.00144	0.000462	0.00249
id12005739	id6003372	0.000494	0.000444	0.00132
id12005739	id8001212	0.00447	0.000705	0.00189
id12005764	id12010129	0.000976	0.00198	0.00177
id12005764	id2003226	0.00238	0.00018	0.00128
id12005764	id3001390	0.00245	0.000286	0.000628
id12005774	id3000764	0.000435	0.000614	0.00219
id12005774	id3009463	0.000678	0.00252	0.00499
id12005774	id6013622	0.000514	0.00085	0.00211
id12005794	id5006409	0.00288	0.000348	0.000455
id12005858	id3009022	9.21e-05	0.000232	0.000625
id12005858	id5006409	0.00174	4.68e-05	9.07e-05
id12005858	id6012706	0.000427	0.000185	0.000825
id12005858	id8005231	0.00079	0.000893	0.00543
id12005874	id4010688	0.000664	0.000476	0.00082
id12005874	id5006409	3.92e-05	2.99e-05	3.24e-05
id12005874	id8005231	6.09e-06	7.39e-06	3.71e-05
id12005874	id8007655	0.000612	0.000192	0.000584
id12005874	wd11003168	0.00145	0.000565	0.0031
id12005874	wd3000294	0.00262	0.000598	0.00404
id12005977	id4006672	1.33e-05	8.22e-06	1.94e-05
id12005977	id4006690	0.000839	0.000174	0.000654
id12005977	id5006409	0.000932	0.00112	0.000722
id12005977	id8006200	0.000743	0.00115	0.0013
id12006068	id2001549	0.000162	0.00638	0.00901
id12006261	id2010160	0.00119	0.000181	0.000436
id12006261	id2013042	0.000828	0.000178	0.000555
id12006261	id3003813	0.000261	5.41e-05	8.13e-05
id12006261	id5007974	0.000479	0.00047	0.000425
id12006261	id9004722	0.00675	0.0005	0.000543
id12006396	id7005551	0.00057	0.000292	0.000811
id12006396	id9001850	0.0004	0.000625	0.000766
id12006562	id12007609	0.000398	0.00152	0.00139
id12006562	id2010160	0.000396	0.00286	0.00486
id12006562	id2010969	8.33e-05	4.63e-05	0.000227
id12006562	id4004005	0.000116	0.00016	0.000296
id12006562	id6003161	6.67e-05	2.88e-05	0.000171
id12006562	id6007277	0.000101	0.000129	0.000697
id12006562	id7001730	0.000733	0.000422	0.00169
id12006562	id8001832	0.00133	0.000468	0.00255
id12006809	wd10000774	0.000166	7.79e-05	0.000571
id12007063	id5006409	0.000452	4.85e-05	2.29e-05
id12007214	id12007532	0.000608	0.000449	0.000903
id12007214	id2016162	0.000519	0.00152	0.00218
id12007214	ud6000233	0.000588	0.00339	0.0118
id12007226	id6016824	0.00117	0.000116	0.000556
id12007257	id2010403	0.00157	0.000548	0.00272
id12007532	id5006409	0.000617	0.000553	0.000789
id12007532	id9004722	0.0103	0.000875	0.00065
id12007532	ud12001424	0.000898	0.00131	0.00216
id12007561	id2000635	0.00204	0.000616	0.00329
id12007561	id2015172	0.000226	0.00016	0.000571
id12007561	id3000020	0.000325	0.000125	0.00139
id12007601	id2002077	0.000649	0.000452	0.00375
[truncated: 1,562 more rows]

## Sheet: 03.Wheat
SNP01	SNP02	REMMA	Q+K	Q+2K
SNP10003	SNP11463	0.00614	0.000717	0.00913
SNP10003	SNP1665	0.000759	0.0028	0.000962
SNP10003	SNP4664	0.00614	0.000717	0.00913
SNP10003	SNP7243	0.00536	0.000794	0.00736
SNP10003	SNP9071	0.00552	0.000753	0.00781
SNP10006	SNP10297	0.000713	0.000305	0.000799
SNP10006	SNP12157	0.000713	0.000305	0.000799
SNP10006	SNP12249	0.000713	0.000305	0.000799
SNP10006	SNP12569	0.000932	0.000555	0.000977
SNP10006	SNP15436	0.000713	0.000305	0.000799
SNP10006	SNP16095	0.000713	0.000305	0.000799
SNP10006	SNP16438	0.000713	0.000305	0.000799
SNP10006	SNP6981	0.00145	0.00048	0.00155
SNP10006	SNP7123	0.066	0.000868	0.0618
SNP10006	SNP8401	0.000713	0.000305	0.000799
SNP10006	SNP9003	0.000713	0.000305	0.000799
SNP10008	SNP10379	0.00263	0.000267	0.00326
SNP10008	SNP1066	0.000473	9.4e-05	0.000689
SNP10008	SNP1105	0.00344	0.000654	0.00259
SNP10008	SNP11052	0.00344	0.000654	0.00259
SNP10008	SNP11180	0.00572	0.000139	0.00297
SNP10008	SNP11181	0.00572	0.000139	0.00297
SNP10008	SNP11217	0.00359	0.000502	0.00615
SNP10008	SNP11272	0.0274	0.000519	0.0208
SNP10008	SNP11463	0.0025	9.96e-05	0.00313
SNP10008	SNP11643	0.0146	0.000891	0.00799
SNP10008	SNP11746	0.00359	0.000502	0.00615
SNP10008	SNP12364	0.00572	0.000139	0.00297
SNP10008	SNP1270	0.000952	7.28e-05	0.00108
SNP10008	SNP12930	0.00572	0.000139	0.00297
SNP10008	SNP13031	0.00305	0.00053	0.00253
SNP10008	SNP13636	0.000554	0.000119	0.000882
SNP10008	SNP13781	0.00201	0.000183	0.00114
SNP10008	SNP14017	0.0104	0.000667	0.013
SNP10008	SNP14067	0.0389	0.000972	0.0148
SNP10008	SNP1418	0.00213	0.000529	0.00339
SNP10008	SNP14374	0.00359	0.000502	0.00615
SNP10008	SNP14453	0.00297	0.000484	0.00485
SNP10008	SNP14616	0.00266	0.000296	0.00291
SNP10008	SNP15076	0.013	0.000912	0.0126
SNP10008	SNP15140	0.00359	0.000502	0.00615
SNP10008	SNP15141	0.00297	0.000484	0.00485
SNP10008	SNP15195	0.00297	0.000484	0.00485
SNP10008	SNP1556	0.00309	0.000438	0.0057
SNP10008	SNP1570	0.00297	0.000484	0.00485
SNP10008	SNP15722	0.00359	0.000502	0.00615
SNP10008	SNP15925	0.00246	0.000281	0.00111
SNP10008	SNP15934	0.00359	0.000502	0.00615
SNP10008	SNP16217	0.00359	0.000502	0.00615
SNP10008	SNP16250	0.00359	0.000502	0.00615
SNP10008	SNP16337	0.00359	0.000502	0.00615
SNP10008	SNP16357	0.00359	0.000502	0.00615
SNP10008	SNP16609	0.0524	0.000824	0.0354
SNP10008	SNP16783	0.00309	0.000438	0.0057
SNP10008	SNP16855	0.00359	0.000502	0.00615
SNP10008	SNP16856	0.00359	0.000502	0.00615
SNP10008	SNP16994	0.00297	0.000484	0.00485
SNP10008	SNP17002	0.00359	0.000502	0.00615
SNP10008	SNP17184	0.00359	0.000502	0.00615
SNP10008	SNP17223	0.00297	0.000484	0.00485
SNP10008	SNP1726	0.00722	0.000414	0.00732
SNP10008	SNP2517	0.00359	0.000502	0.00615
SNP10008	SNP2646	0.0195	0.000886	0.015
SNP10008	SNP2664	0.00297	0.000484	0.00485
SNP10008	SNP2870	0.00297	0.000484	0.00485
SNP10008	SNP3340	0.00297	0.000484	0.00485
SNP10008	SNP3455	0.00297	0.000484	0.00485
SNP10008	SNP3662	0.00359	0.000502	0.00615
SNP10008	SNP3692	0.00297	0.000484	0.00485
SNP10008	SNP4042	0.00359	0.000502	0.00615
SNP10008	SNP4344	0.00309	0.000438	0.0057
SNP10008	SNP4410	0.00344	0.000654	0.00259
SNP10008	SNP4664	0.0025	9.96e-05	0.00313
SNP10008	SNP5108	0.00359	0.000502	0.00615
SNP10008	SNP5161	0.00359	0.000502	0.00615
SNP10008	SNP6163	0.00572	0.000139	0.00297
SNP10008	SNP6817	0.0158	0.000775	0.00652
SNP10008	SNP6831	0.0253	0.00055	0.0162
SNP10008	SNP7110	0.00572	0.000139	0.00297
SNP10008	SNP7539	0.00344	0.000654	0.00259
SNP10008	SNP7685	0.00297	0.000484	0.00485
SNP10008	SNP7974	0.00572	0.000139	0.00297
SNP10008	SNP8676	0.00359	0.000502	0.00615
SNP10008	SNP8752	0.00359	0.000502	0.00615
SNP10008	SNP8779	0.00297	0.000484	0.00485
SNP10008	SNP9030	0.00572	0.000139	0.00297
SNP10008	SNP9071	0.00828	0.000217	0.00959
SNP10008	SNP9462	0.00297	0.000484	0.00485
SNP10008	SNP9702	0.00266	0.000296	0.00291
SNP10022	SNP10050	0.029	0.000291	0.0302
SNP10022	SNP10254	0.0121	0.000534	0.00886
SNP10022	SNP1037	0.0117	0.000118	0.014
SNP10022	SNP10379	0.0474	0.000391	0.0414
SNP10022	SNP10590	0.000681	0.000364	0.000799
SNP10022	SNP10644	0.01	0.000185	0.009
SNP10022	SNP10702	0.0385	0.000636	0.0349
SNP10022	SNP10856	0.0265	0.000924	0.0284
SNP10022	SNP10955	0.0285	0.000564	0.0377
SNP10022	SNP11341	0.00534	7.23e-06	0.00561
SNP10022	SNP11379	0.029	0.000291	0.0302
SNP10022	SNP11463	0.0236	5.24e-05	0.0253
SNP10022	SNP12176	0.0121	0.000534	0.00886
SNP10022	SNP12473	0.00328	0.000141	0.00339
SNP10022	SNP12480	0.00328	0.000141	0.00339
SNP10022	SNP12650	0.00748	0.000669	0.00951
SNP10022	SNP13402	0.0866	0.000376	0.0984
SNP10022	SNP13853	0.00793	0.000143	0.00717
SNP10022	SNP14089	0.00487	0.000161	0.00455
SNP10022	SNP14304	0.0121	0.000534	0.00886
SNP10022	SNP15312	0.00433	0.000179	0.00443
SNP10022	SNP15368	0.0192	0.000605	0.0194
SNP10022	SNP16016	0.0415	0.000754	0.0551
SNP10022	SNP16609	0.0826	0.000532	0.101
SNP10022	SNP1728	0.0478	0.000472	0.0595
SNP10022	SNP2239	0.0207	0.000293	0.0224
SNP10022	SNP2311	0.0243	0.000371	0.0229
SNP10022	SNP2428	0.0141	0.000545	0.027
SNP10022	SNP2702	0.0157	0.00041	0.0152
SNP10022	SNP330	0.029	0.000291	0.0302
SNP10022	SNP3958	0.0313	0.000905	0.0337
SNP10022	SNP4001	0.00867	0.000913	0.00931
SNP10022	SNP4009	0.0573	0.000215	0.0661
SNP10022	SNP4070	0.00385	7.96e-05	0.00349
SNP10022	SNP4328	0.00251	5.24e-05	0.00234
SNP10022	SNP4588	0.0159	0.00062	0.0136
SNP10022	SNP4664	0.0236	5.24e-05	0.0253
SNP10022	SNP5212	0.0181	0.000849	0.0151
SNP10022	SNP5585	0.0208	7.02e-05	0.0214
SNP10022	SNP5900	0.029	0.000291	0.0302
SNP10022	SNP600	0.101	0.000444	0.105
SNP10022	SNP601	0.0654	0.000232	0.0678
SNP10022	SNP6019	0.123	0.00036	0.129
SNP10022	SNP7123	0.0845	0.000235	0.0803
SNP10022	SNP7163	0.0281	0.000129	0.0304
SNP10022	SNP7243	0.0988	0.000334	0.117
SNP10022	SNP7411	0.000203	0.000657	0.000208
SNP10022	SNP7991	0.027	0.000467	0.0303
SNP10022	SNP8978	0.0596	0.000624	0.0692
SNP10022	SNP904	0.0207	0.000293	0.0224
SNP10022	SNP9071	0.0436	6.95e-05	0.0436
SNP10022	SNP9100	0.00534	7.23e-06	0.00561
SNP10022	SNP9227	0.0258	0.000386	0.0242
SNP10022	SNP93	0.0169	0.000166	0.0241
SNP10025	SNP10360	0.0474	6.76e-06	0.0491
SNP10025	SNP10361	0.216	0.000499	0.293
SNP10025	SNP10379	0.00677	2.33e-07	0.00708
SNP10025	SNP10448	0.549	0.00099	0.58
SNP10025	SNP10468	0.153	0.000973	0.178
SNP10025	SNP10646	0.0666	1.13e-06	0.0737
SNP10025	SNP10647	0.368	0.000113	0.382
SNP10025	SNP10706	0.066	7.49e-05	0.0728
SNP10025	SNP10784	0.00901	9.85e-06	0.0101
SNP10025	SNP10838	0.549	0.00099	0.58
SNP10025	SNP10955	0.0155	0.00025	0.0174
SNP10025	SNP11	0.122	0.000159	0.134
SNP10025	SNP11120	0.0278	6.17e-05	0.0305
SNP10025	SNP11180	0.0603	8.47e-05	0.0637
SNP10025	SNP11181	0.0603	8.47e-05	0.0637
SNP10025	SNP11272	0.0439	1.4e-05	0.0515
SNP10025	SNP11327	0.0468	0.000244	0.0472
SNP10025	SNP11341	0.00791	1.4e-05	0.00831
SNP10025	SNP1135	0.134	0.000794	0.139
SNP10025	SNP11352	0.257	0.000131	0.25
SNP10025	SNP11353	0.257	0.000131	0.25
SNP10025	SNP11377	0.0035	0.000188	0.00481
SNP10025	SNP11463	0.000295	7.02e-10	0.000357
SNP10025	SNP11627	0.026	0.000223	0.0279
SNP10025	SNP11643	0.192	0.000258	0.193
SNP10025	SNP11767	0.134	0.000794	0.139
SNP10025	SNP11965	0.289	0.000254	0.317
SNP10025	SNP12	0.304	0.000534	0.321
SNP10025	SNP12024	0.168	0.000895	0.171
SNP10025	SNP12054	0.0114	0.000733	0.0153
SNP10025	SNP12159	0.0177	5.26e-08	0.0202
SNP10025	SNP12316	0.0145	6.75e-05	0.0146
SNP10025	SNP12364	0.0603	8.47e-05	0.0637
SNP10025	SNP12586	0.279	0.000212	0.324
SNP10025	SNP12668	0.23	0.000181	0.243
SNP10025	SNP12899	0.0452	0.000114	0.0491
SNP10025	SNP12927	0.191	0.000128	0.204
SNP10025	SNP12930	0.0603	8.47e-05	0.0637
SNP10025	SNP12937	0.0336	0.00012	0.0373
SNP10025	SNP12967	0.0114	0.000733	0.0153
SNP10025	SNP12983	0.0474	6.76e-06	0.0491
SNP10025	SNP13141	0.797	0.00056	0.672
SNP10025	SNP13142	0.797	0.00056	0.672
SNP10025	SNP13321	0.248	0.000935	0.25
SNP10025	SNP13392	0.0474	6.76e-06	0.0491
SNP10025	SNP13402	0.0593	4.94e-05	0.0625
SNP10025	SNP13449	0.0114	0.000733	0.0153
SNP10025	SNP13636	0.0799	0.00066	0.0835
SNP10025	SNP13767	0.257	0.000131	0.25
SNP10025	SNP13833	0.168	0.000187	0.175
SNP10025	SNP13842	0.194	0.000108	0.2
SNP10025	SNP1385	0.134	0.000794	0.139
SNP10025	SNP13924	0.194	0.000108	0.2
SNP10025	SNP13926	0.194	0.000108	0.2
SNP10025	SNP13933	0.23	0.000181	0.243
SNP10025	SNP14066	0.0258	1.49e-05	0.0404
SNP10025	SNP14067	0.0589	2.77e-05	0.0738
SNP10025	SNP1410	0.135	0.000163	0.137
SNP10025	SNP14137	0.00413	3.06e-07	0.00698
SNP10025	SNP14163	0.0413	0.000768	0.0434
SNP10025	SNP14366	0.0189	0.000548	0.0209
SNP10025	SNP1441	0.427	0.000679	0.417
SNP10025	SNP14681	0.159	0.000216	0.176
SNP10025	SNP14868	0.171	0.00017	0.175
SNP10025	SNP15278	0.0354	0.000607	0.0378
SNP10025	SNP15279	0.0354	0.000607	0.0378
SNP10025	SNP15280	0.0354	0.000607	0.0378
SNP10025	SNP15354	0.03	0.000841	0.0298
SNP10025	SNP15519	0.216	0.000499	0.293
SNP10025	SNP15552	0.295	0.000445	0.299
SNP10025	SNP15626	0.0538	3.19e-05	0.0592
SNP10025	SNP15676	0.261	0.000401	0.256
SNP10025	SNP15719	0.0114	0.000733	0.0153
SNP10025	SNP15765	0.0303	8.76e-05	0.0339
SNP10025	SNP15861	0.0464	1.54e-05	0.0476
SNP10025	SNP1601	0.257	0.000131	0.25
SNP10025	SNP16013	0.257	0.000131	0.25
SNP10025	SNP16016	0.0232	0.000333	0.0265
SNP10025	SNP16072	0.13	7.75e-06	0.134
SNP10025	SNP16125	0.257	0.000131	0.25
SNP10025	SNP16128	0.197	1.56e-05	0.202
SNP10025	SNP16225	0.279	0.000212	0.324
SNP10025	SNP16473	0.0277	0.000176	0.0329
SNP10025	SNP16555	0.0035	0.000188	0.00481
SNP10025	SNP16609	0.036	1.28e-06	0.0351
SNP10025	SNP16686	0.0461	3.59e-06	0.0489
SNP10025	SNP16716	0.00191	4.14e-06	0.00221
SNP10025	SNP1693	0.134	0.000794	0.139
SNP10025	SNP16952	0.0468	0.000244	0.0472
SNP10025	SNP17083	0.0207	0.000827	0.0217
SNP10025	SNP17094	0.0112	2.69e-05	0.0119
SNP10025	SNP1728	0.0034	2.2e-05	0.0037
SNP10025	SNP179	0.0258	1.49e-05	0.0404
SNP10025	SNP1804	0.0721	0.000115	0.0764
SNP10025	SNP1921	0.0407	0.000103	0.0453
SNP10025	SNP1960	0.109	0.000129	0.119
SNP10025	SNP2004	0.0303	9.27e-05	0.0339
SNP10025	SNP2015	0.549	0.00099	0.58
SNP10025	SNP2116	0.0548	0.000294	0.0512
SNP10025	SNP2236	0.289	0.000254	0.317
SNP10025	SNP2358	0.134	0.000794	0.139
SNP10025	SNP2380	0.325	0.000378	0.316
SNP10025	SNP2428	0.012	5.43e-05	0.0091
SNP10025	SNP2483	0.127	0.000184	0.124
SNP10025	SNP2484	0.302	0.000262	0.296
SNP10025	SNP2595	0.0303	0.000268	0.0352
SNP10025	SNP2793	0.0199	0.00017	0.0215
SNP10025	SNP2983	0.0878	0.000125	0.093
SNP10025	SNP3029	0.134	0.000794	0.139
SNP10025	SNP3345	0.195	0.000261	0.196
SNP10025	SNP335	0.23	0.000181	0.243
SNP10025	SNP3408	0.257	0.000131	0.25
SNP10025	SNP3905	0.0878	0.000137	0.0959
SNP10025	SNP4009	0.0363	6.11e-05	0.0389
SNP10025	SNP4376	0.159	0.000216	0.176
SNP10025	SNP4423	0.161	0.000356	0.154
SNP10025	SNP46	0.122	0.000628	0.129
SNP10025	SNP4664	0.000295	7.02e-10	0.000357
SNP10025	SNP498	0.134	0.000794	0.139
SNP10025	SNP4984	0.257	0.000131	0.25
SNP10025	SNP5033	0.153	0.000973	0.178
SNP10025	SNP5099	0.0112	9.88e-05	0.0124
SNP10025	SNP5210	0.065	2.99e-05	0.103
SNP10025	SNP5211	0.065	2.99e-05	0.103
SNP10025	SNP5223	0.0482	0.000329	0.049
SNP10025	SNP5230	0.0246	2e-07	0.0259
SNP10025	SNP5308	0.257	0.000131	0.25
SNP10025	SNP5349	0.0145	6.75e-05	0.0146
SNP10025	SNP5396	0.248	0.000935	0.25
SNP10025	SNP5585	0.0273	2.4e-05	0.0306
SNP10025	SNP5644	0.0514	4.69e-05	0.0565
SNP10025	SNP5753	0.197	1.56e-05	0.202
SNP10025	SNP5811	0.0177	5.26e-08	0.0202
SNP10025	SNP5812	0.0177	5.26e-08	0.0202
SNP10025	SNP5856	0.248	0.000935	0.25
SNP10025	SNP5883	0.0654	0.000223	0.0626
SNP10025	SNP600	0.0479	7.73e-06	0.0509
SNP10025	SNP601	0.165	0.000582	0.169
SNP10025	SNP6019	0.0674	1.42e-05	0.0715
SNP10025	SNP6163	0.0603	8.47e-05	0.0637
SNP10025	SNP6217	0.328	0.000668	0.328
SNP10025	SNP6239	0.134	0.000794	0.139
SNP10025	SNP6310	0.0987	0.000856	0.095
SNP10025	SNP6404	0.242	0.000583	0.265
SNP10025	SNP6485	0.131	2.24e-05	0.14
SNP10025	SNP6633	0.0378	0.000681	0.0352
SNP10025	SNP6831	0.0599	1.64e-05	0.0605
SNP10025	SNP7110	0.0603	8.47e-05	0.0637
SNP10025	SNP7163	0.0188	8.99e-06	0.0208
SNP10025	SNP7187	0.0337	0.00015	0.0337
SNP10025	SNP7208	0.194	0.000108	0.2
SNP10025	SNP7243	0.011	5.34e-06	0.0122
SNP10025	SNP7320	0.174	0.000301	0.184
SNP10025	SNP7374	0.0514	4.69e-05	0.0565
SNP10025	SNP766	0.168	0.000895	0.171
SNP10025	SNP7702	0.134	0.000794	0.139
SNP10025	SNP7748	0.194	0.000108	0.2
SNP10025	SNP7753	0.134	0.000794	0.139
SNP10025	SNP7857	0.215	0.000757	0.229
SNP10025	SNP7942	0.289	0.000254	0.317
SNP10025	SNP7952	0.161	0.000286	0.166
SNP10025	SNP7974	0.0603	8.47e-05	0.0637
SNP10025	SNP8247	0.215	0.000757	0.229
SNP10025	SNP843	0.257	0.000131	0.25
SNP10025	SNP8470	0.0538	3.19e-05	0.0592
SNP10025	SNP8497	0.134	0.000794	0.139
SNP10025	SNP8591	0.261	0.000401	0.256
SNP10025	SNP8927	0.134	0.000794	0.139
SNP10025	SNP8978	0.0485	0.000154	0.0533
SNP10025	SNP9030	0.0603	8.47e-05	0.0637
SNP10025	SNP9049	0.109	0.000129	0.119
SNP10025	SNP9071	0.005	1.36e-07	0.00492
SNP10025	SNP9094	0.216	0.000499	0.293
SNP10025	SNP9100	0.00791	1.4e-05	0.00831
SNP10025	SNP9492	0.0114	0.000733	0.0153
SNP10025	SNP9639	0.0461	3.59e-06	0.0489
SNP10025	SNP9640	0.0461	3.59e-06	0.0489
SNP10025	SNP9643	0.0211	1.11e-05	0.0227
SNP10025	SNP9719	0.0413	0.000768	0.0434
SNP10025	SNP9877	0.408	0.000241	0.383
SNP10025	SNP9881	0.0217	0.000574	0.0222
SNP10025	SNP9882	0.0893	9.81e-05	0.0914
SNP10027	SNP10050	0.0151	2.13e-05	0.0182
SNP10027	SNP10089	0.0401	0.000799	0.046
SNP10027	SNP10118	0.0255	0.000304	0.026
SNP10027	SNP10263	0.0022	0.000415	0.00227
SNP10027	SNP10361	0.00305	0.000149	0.000294
SNP10027	SNP10397	0.0237	7.17e-05	0.0285
SNP10027	SNP10429	0.0401	0.000799	0.046
SNP10027	SNP10657	0.00295	6.4e-05	0.0028
SNP10027	SNP10855	0.0188	0.000316	0.0199
SNP10027	SNP1129	0.0269	0.000106	0.0213
SNP10027	SNP11307	0.0455	0.000935	0.0502
SNP10027	SNP11341	0.0384	6.69e-05	0.0487
SNP10027	SNP11379	0.0151	2.13e-05	0.0182
SNP10027	SNP11539	0.0425	0.000332	0.0438
SNP10027	SNP11856	0.0191	4.62e-05	0.0235
SNP10027	SNP11969	0.0255	0.000304	0.026
SNP10027	SNP1220	0.00662	7.89e-06	0.00726
SNP10027	SNP12984	0.0269	0.000106	0.0213
SNP10027	SNP13024	0.0401	0.000799	0.046
SNP10027	SNP13373	0.0153	0.000134	0.0139
SNP10027	SNP13402	0.0442	0.000363	0.0505
SNP10027	SNP13464	0.0455	0.000935	0.0502
SNP10027	SNP13589	0.205	0.000917	0.118
SNP10027	SNP13680	0.0336	0.000359	0.0323
SNP10027	SNP1376	0.0522	0.000657	0.0593
SNP10027	SNP14066	0.00238	5.4e-05	8.68e-05
SNP10027	SNP14067	0.0042	0.000124	0.000197
SNP10027	SNP143	0.0401	0.000799	0.046
SNP10027	SNP14506	0.0522	0.000657	0.0593
SNP10027	SNP14994	0.0455	0.000935	0.0502
SNP10027	SNP14997	0.0455	0.000935	0.0502
SNP10027	SNP15103	0.0455	0.000297	0.0605
SNP10027	SNP15272	0.0455	0.000935	0.0502
SNP10027	SNP15273	0.0455	0.000935	0.0502
SNP10027	SNP15353	0.109	0.000673	0.104
SNP10027	SNP15427	0.00662	7.89e-06	0.00726
SNP10027	SNP15428	0.00662	7.89e-06	0.00726
SNP10027	SNP15429	0.00662	7.89e-06	0.00726
SNP10027	SNP15430	0.00662	7.89e-06	0.00726
SNP10027	SNP15467	0.0255	0.000304	0.026
SNP10027	SNP15519	0.00305	0.000149	0.000294
SNP10027	SNP15579	0.0455	0.000935	0.0502
SNP10027	SNP15590	0.0455	0.000935	0.0502
SNP10027	SNP15605	0.0455	0.000935	0.0502
SNP10027	SNP15606	0.0455	0.000935	0.0502
SNP10027	SNP15691	0.0336	0.000359	0.0323
SNP10027	SNP15693	0.00271	0.000216	0.00195
SNP10027	SNP15724	0.0455	0.000935	0.0502
SNP10027	SNP15725	0.0422	0.000801	0.0457
SNP10027	SNP16535	0.0455	0.000935	0.0502
SNP10027	SNP16750	0.0455	0.000935	0.0502
SNP10027	SNP16876	0.00841	0.000367	0.00955
SNP10027	SNP17064	0.00786	0.000795	0.00835
SNP10027	SNP17127	0.0455	0.000935	0.0502
SNP10027	SNP17249	0.0401	0.000799	0.046
SNP10027	SNP179	0.00238	5.4e-05	8.68e-05
SNP10027	SNP2038	0.0395	0.000253	0.036
SNP10027	SNP2239	0.014	1.83e-05	0.0162
SNP10027	SNP2512	0.0385	0.000534	0.042
SNP10027	SNP2884	0.0395	0.000253	0.036
SNP10027	SNP3270	0.0357	0.000217	0.0329
SNP10027	SNP330	0.0151	2.13e-05	0.0182
SNP10027	SNP3797	0.0218	8.78e-05	0.018
SNP10027	SNP4004	0.0269	0.000106	0.0213
SNP10027	SNP4009	0.0669	0.000843	0.0763
SNP10027	SNP4057	0.00397	0.000348	0.00354
SNP10027	SNP4388	0.0401	0.000799	0.046
SNP10027	SNP4455	0.0455	0.000935	0.0502
SNP10027	SNP4456	0.0455	0.000935	0.0502
SNP10027	SNP4464	0.012	0.000977	0.0113
SNP10027	SNP4598	0.0255	0.000304	0.026
SNP10027	SNP4609	0.0255	0.000304	0.026
SNP10027	SNP4639	0.0255	0.000304	0.026
SNP10027	SNP4823	0.0816	0.000978	0.112
SNP10027	SNP4894	0.0336	0.000359	0.0323
SNP10027	SNP4941	0.0455	0.000935	0.0502
SNP10027	SNP4987	0.0455	0.000935	0.0502
SNP10027	SNP5111	0.0255	0.000304	0.026
SNP10027	SNP5118	0.0455	0.000935	0.0502
SNP10027	SNP5198	0.0455	0.000935	0.0502
SNP10027	SNP5704	0.00136	0.00187	0.000835
SNP10027	SNP5867	0.0255	0.000304	0.026
SNP10027	SNP5900	0.0151	2.13e-05	0.0182
SNP10027	SNP6136	0.0166	0.000477	0.0159
SNP10027	SNP6536	0.0455	0.000935	0.0502
SNP10027	SNP6583	0.0455	0.000935	0.0502
SNP10027	SNP6844	0.0414	0.000268	0.0373
SNP10027	SNP7094	0.0754	0.000531	0.0702
SNP10027	SNP7123	0.0403	9.15e-05	0.0446
SNP10027	SNP737	0.00418	0.000346	0.00268
SNP10027	SNP7528	0.113	0.000724	0.115
SNP10027	SNP7536	0.00136	0.00187	0.000835
SNP10027	SNP7955	0.0653	0.000162	0.0691
SNP10027	SNP7982	0.0255	0.000304	0.026
SNP10027	SNP7991	0.0103	1.1e-05	0.0115
SNP10027	SNP8021	0.0121	0.00074	0.00857
SNP10027	SNP8046	0.0395	0.000253	0.036
SNP10027	SNP8567	0.0584	0.000302	0.0422
SNP10027	SNP8679	0.00418	2.25e-05	0.00464
SNP10027	SNP8870	0.0179	4.46e-05	0.0207
SNP10027	SNP8962	0.0395	0.000253	0.036
SNP10027	SNP904	0.014	1.83e-05	0.0162
SNP10027	SNP9077	0.00083	3.1e-07	0.000647
SNP10027	SNP9094	0.00305	0.000149	0.000294
SNP10027	SNP9100	0.0384	6.69e-05	0.0487
SNP10027	SNP9349	0.0455	0.000935	0.0502
SNP10027	SNP937	0.0395	0.000253	0.036
SNP10027	SNP9540	0.00662	7.89e-06	0.00726
SNP10027	SNP9552	0.0455	0.000935	0.0502
SNP10027	SNP9712	0.0386	0.000597	0.0352
SNP10031	SNP10049	0.000632	0.000664	0.00218
SNP10031	SNP1006	0.000999	0.000363	0.00149
SNP10031	SNP1728	0.000172	4.7e-05	0.000164
SNP10031	SNP17351	0.00622	0.000754	0.00628
SNP10044	SNP10176	0.000541	0.000421	0.0011
SNP10044	SNP10397	0.0179	0.000154	0.023
SNP10044	SNP11341	0.000251	2.04e-07	0.000308
SNP10044	SNP13402	0.012	6.77e-05	0.0133
SNP10044	SNP13935	0.0111	0.000841	0.015
SNP10044	SNP14163	0.0134	0.000278	0.0156
SNP10044	SNP15983	0.0251	0.000894	0.0298
SNP10044	SNP16071	0.00581	0.000138	0.00571
SNP10044	SNP17168	0.00432	0.000779	0.00485
SNP10044	SNP2380	0.0349	0.000661	0.047
SNP10044	SNP4009	0.00796	7.55e-05	0.00926
SNP10044	SNP5447	0.0452	0.000618	0.0576
SNP10044	SNP7123	0.0117	9.09e-05	0.0132
SNP10044	SNP7564	0.0104	0.000805	0.0147
SNP10044	SNP8870	0.0131	0.000277	0.0172
SNP10044	SNP9077	0.01	0.000653	0.0134
SNP10044	SNP9100	0.000251	2.04e-07	0.000308
SNP10044	SNP9649	0.000961	0.00121	0.000963
SNP10044	SNP9719	0.0134	0.000278	0.0156
SNP10049	SNP10050	0.000301	1.78e-05	0.000417
SNP10049	SNP10397	0.000294	3.45e-05	0.000406
SNP10049	SNP10670	0.00695	0.000977	0.00894
SNP10049	SNP10856	0.000277	0.000114	0.000456
SNP10049	SNP11341	0.000103	1.66e-05	0.000365
SNP10049	SNP11379	0.000301	1.78e-05	0.000417
SNP10049	SNP11698	0.000901	1	1
SNP10049	SNP11856	0.000518	3.75e-05	0.000406
SNP10049	SNP1227	0.000438	0.000127	0.000539
SNP10049	SNP12281	0.00112	0.000372	0.000436
SNP10049	SNP13118	0.000438	0.000127	0.000539
SNP10049	SNP13402	0.000339	3.02e-05	0.000654
SNP10049	SNP1376	0.000144	1.37e-05	0.000308
SNP10049	SNP14151	0.00855	0.000866	0.0194
SNP10049	SNP14506	0.000144	1.37e-05	0.000308
SNP10049	SNP14993	0.000721	0.000133	0.000611
SNP10049	SNP15173	0.000438	0.000127	0.000539
SNP10049	SNP15839	0.019	0.000186	0.00338
SNP10049	SNP16106	0.000438	0.000127	0.000539
SNP10049	SNP16457	0.00649	0.000698	0.00154
SNP10049	SNP16458	0.00649	0.000698	0.00154
SNP10049	SNP16637	0.00256	0.000289	0.00504
SNP10049	SNP17255	0.00638	0.000716	0.00158
SNP10049	SNP2109	0.000693	0.00151	0.00434
SNP10049	SNP2239	0.000259	1.74e-05	0.000402
SNP10049	SNP2516	0.000326	0.000117	0.000454
SNP10049	SNP2894	0.000439	0.000742	0.000876
SNP10049	SNP2964	0.00105	5.09e-05	0.00193
SNP10049	SNP3050	0.000438	0.000127	0.000539
SNP10049	SNP321	0.00413	0.000471	0.00516
SNP10049	SNP330	0.000301	1.78e-05	0.000417
SNP10049	SNP3381	0.000426	1	1
SNP10049	SNP3788	0.000365	0.000698	0.00132
SNP10049	SNP3900	0.000622	0.000606	0.00197
SNP10049	SNP3901	0.000545	0.000531	0.00177
SNP10049	SNP4009	0.00022	1.08e-05	0.000283
SNP10049	SNP4735	0.000817	0.000267	0.000735
SNP10049	SNP4964	0.00245	0.000861	0.00256
SNP10049	SNP5051	0.00146	0.000591	0.00166
SNP10049	SNP527	0.000426	1	1
SNP10049	SNP5447	0.0037	0.000399	0.00441
SNP10049	SNP5454	0.00413	0.000471	0.00516
SNP10049	SNP5900	0.000301	1.78e-05	0.000417
SNP10049	SNP652	0.00394	0.000398	0.00366
SNP10049	SNP7123	0.000281	2.42e-05	0.000447
SNP10049	SNP7991	0.000297	1.77e-05	0.000415
SNP10049	SNP8201	0.00158	0.000738	0.00125
SNP10049	SNP8358	0.00132	0.000627	0.00212
SNP10049	SNP8870	0.000298	3.11e-05	0.000284
SNP10049	SNP904	0.000259	1.74e-05	0.000402
SNP10049	SNP9077	0.00219	0.000172	0.00339
SNP10049	SNP9100	0.000103	1.66e-05	0.000365
SNP10049	SNP9178	0.00649	0.000698	0.00154
SNP10049	SNP93	0.0013	0.000572	0.00191
SNP10049	SNP9301	0.00036	0.000119	0.000504
SNP10049	SNP9324	0.000492	0.000127	0.000548
SNP10049	SNP9353	0.000426	1	1
SNP10049	SNP9396	0.000663	0.000263	0.000766
SNP10049	SNP9807	0.000438	0.000127	0.000539
SNP10050	SNP1006	0.000868	1.56e-05	0.000944
SNP10050	SNP10155	0.0579	0.000253	0.0658
SNP10050	SNP10263	0.015	0.000124	0.0152
SNP10050	SNP10291	0.00155	0.000122	0.00145
SNP10050	SNP10292	0.00155	0.000122	0.00145
SNP10050	SNP103	0.00362	0.000621	0.00343
SNP10050	SNP10309	0.0485	0.000581	0.0549
SNP10050	SNP10319	0.0263	5.46e-05	0.034
SNP10050	SNP10360	0.0124	1.96e-07	0.0165
SNP10050	SNP10361	0.00885	8.97e-07	0.0116
SNP10050	SNP10365	0.028	1.81e-05	0.0349
SNP10050	SNP1037	0.0178	0.00023	0.0135
SNP10050	SNP10379	2.36e-17	1.31e-32	1.01e-16
SNP10050	SNP10574	0.0757	0.00087	0.0814
SNP10050	SNP10646	0.000495	9.07e-12	0.000602
SNP10050	SNP10647	0.0187	1.25e-07	0.0185
SNP10050	SNP10654	0.0824	0.000394	0.0715
SNP10050	SNP10659	0.00625	2.86e-05	0.00362
SNP10050	SNP1066	0.0902	0.000947	0.108
SNP10050	SNP10664	4.42e-07	3.99e-14	4.39e-07
SNP10050	SNP10687	0.00102	4.32e-09	0.00145
SNP10050	SNP10706	0.422	5.99e-05	0.471
SNP10050	SNP10870	0.00149	2.14e-07	0.00209
SNP10050	SNP10883	0.194	0.00086	0.194
SNP10050	SNP10927	0.000647	2.2e-05	0.000536
SNP10050	SNP10970	0.0151	2.13e-05	0.0182
SNP10050	SNP10983	0.0958	0.000731	0.108
SNP10050	SNP11	0.342	3.11e-05	0.385
SNP10050	SNP11043	0.000493	3.62e-07	0.000662
SNP10050	SNP11108	0.0454	0.000987	0.053
SNP10050	SNP11120	0.0283	2.15e-08	0.0304
SNP10050	SNP11175	0.209	0.000573	0.181
SNP10050	SNP11180	0.00171	8.85e-07	0.00235
SNP10050	SNP11181	0.00171	8.85e-07	0.00235
SNP10050	SNP11219	0.0379	0.000454	0.0427
SNP10050	SNP11272	9.17e-06	4.14e-15	1.43e-05
SNP10050	SNP11327	0.175	0.000251	0.164
SNP10050	SNP11328	0.00758	8.73e-05	0.0092
SNP10050	SNP11329	0.00097	1.25e-05	0.00125
SNP10050	SNP11338	0.00446	2.23e-05	0.00392
SNP10050	SNP11341	0.00827	2.63e-06	0.00831
SNP10050	SNP11352	0.215	6.52e-05	0.241
SNP10050	SNP11353	0.215	6.52e-05	0.241
SNP10050	SNP11377	0.0043	0.000801	0.00347
SNP10050	SNP11463	1.32e-22	1.44e-40	6.64e-22
SNP10050	SNP11480	0.0838	3.11e-05	0.0887
SNP10050	SNP11522	0.018	2.54e-05	0.0207
SNP10050	SNP11627	0.0541	1.41e-05	0.0556
SNP10050	SNP11643	0.011	4.88e-06	0.019
SNP10050	SNP11686	0.00513	7.69e-05	0.0101
SNP10050	SNP11729	9.59e-05	1.12e-08	0.000101
SNP10050	SNP12	0.762	0.000551	0.806
SNP10050	SNP12116	0.00473	0.00077	0.00609
SNP10050	SNP12145	5.03e-05	1.29e-09	6.4e-05
SNP10050	SNP12159	2.65e-05	2.7e-14	3.63e-05
SNP10050	SNP12221	0.0189	9.38e-05	0.0172
SNP10050	SNP12281	0.0274	3.62e-05	0.0325
SNP10050	SNP12298	0.0113	6.05e-05	0.0096
SNP10050	SNP12316	0.016	0.000184	0.0127
SNP10050	SNP12322	0.00446	2.23e-05	0.00392
SNP10050	SNP12348	0.000139	2.82e-05	0.00019
SNP10050	SNP12364	0.00171	8.85e-07	0.00235
SNP10050	SNP12511	0.00273	2.64e-06	0.00337
SNP10050	SNP12531	3.99e-05	3.42e-08	7.6e-05
SNP10050	SNP1255	0.000302	1.77e-07	0.000321
SNP10050	SNP12556	0.0171	1.91e-05	0.0202
SNP10050	SNP12570	0.00195	2.05e-07	0.00175
SNP10050	SNP12643	0.00435	1.27e-05	0.00386
SNP10050	SNP12668	0.344	0.000708	0.334
SNP10050	SNP12697	0.0104	0.000773	0.00938
SNP10050	SNP12716	0.00801	0.000228	0.0135
SNP10050	SNP12742	0.00036	2.4e-05	0.00057
SNP10050	SNP12752	0.00814	3.64e-05	0.00989
SNP10050	SNP1278	0.0117	0.000875	0.0114
SNP10050	SNP1281	0.00773	8.07e-05	0.00749
SNP10050	SNP12852	0.0185	0.00079	0.0175
SNP10050	SNP12899	0.0374	2.97e-08	0.0405
SNP10050	SNP12930	0.00171	8.85e-07	0.00235
SNP10050	SNP12983	0.0124	1.96e-07	0.0165
SNP10050	SNP13031	0.000295	4.12e-07	0.000339
SNP10050	SNP13041	0.869	0.000483	0.897
SNP10050	SNP13105	0.0199	0.000493	0.0241
SNP10050	SNP13106	0.0199	0.000493	0.0241
SNP10050	SNP13141	0.335	0.000345	0.357
SNP10050	SNP13142	0.335	0.000345	0.357
SNP10050	SNP13172	0.00151	1.83e-05	0.00146
SNP10050	SNP13217	0.00426	0.000146	0.00496
SNP10050	SNP13308	0.264	0.00079	0.243
SNP10050	SNP13321	0.183	1.36e-06	0.193
SNP10050	SNP13392	0.0124	1.96e-07	0.0165
SNP10050	SNP13402	0.00804	1.76e-06	0.0104
SNP10050	SNP1355	0.00157	9.47e-05	0.00216
SNP10050	SNP13584	0.0249	0.000121	0.029
SNP10050	SNP13636	0.0146	0.000104	0.0189
SNP10050	SNP13767	0.215	6.52e-05	0.241
SNP10050	SNP1379	0.0796	0.000908	0.0648
SNP10050	SNP13806	0.0019	1.71e-05	0.00358
SNP10050	SNP13833	0.000477	1.81e-08	0.00059
SNP10050	SNP13842	0.076	6.54e-06	0.11
SNP10050	SNP13866	3.34e-06	1.57e-12	2.82e-06
SNP10050	SNP139	0.000698	0.000979	0.00104
SNP10050	SNP13907	0.00539	1.2e-05	0.00708
SNP10050	SNP13923	0.0419	0.000616	0.0442
SNP10050	SNP13924	0.076	6.54e-06	0.11
SNP10050	SNP13926	0.076	6.54e-06	0.11
SNP10050	SNP13933	0.344	0.000708	0.334
SNP10050	SNP1398	0.0595	0.000684	0.061
SNP10050	SNP14005	0.00554	1.3e-06	0.00849
SNP10050	SNP14007	0.0117	0.00039	0.00905
SNP10050	SNP14066	5.46e-05	1.58e-10	0.000103
SNP10050	SNP14067	3.04e-05	2.57e-11	5.55e-05
SNP10050	SNP14089	0.000108	1.16e-11	0.000154
SNP10050	SNP1410	0.57	6.04e-05	0.636
SNP10050	SNP14125	0.00155	0.000122	0.00145
SNP10050	SNP14127	0.00138	2.3e-09	0.00173
SNP10050	SNP14137	3.49e-05	2.26e-11	7.64e-05
SNP10050	SNP14169	0.0979	0.000959	0.111
SNP10050	SNP14260	0.00324	2.66e-05	0.00309
SNP10050	SNP14281	0.0356	9.72e-05	0.0334
SNP10050	SNP14309	0.264	0.00079	0.243
SNP10050	SNP14310	0.264	0.00079	0.243
SNP10050	SNP14343	0.00149	2.14e-07	0.00209
SNP10050	SNP14366	0.0241	0.00059	0.0291
SNP10050	SNP14387	0.0419	0.000616	0.0442
SNP10050	SNP1441	0.691	0.000224	0.712
SNP10050	SNP14499	0.00157	0.000123	0.00168
SNP10050	SNP14551	0.132	0.000204	0.17
SNP10050	SNP14576	0.00157	0.000123	0.00168
SNP10050	SNP14654	0.0244	0.000472	0.0348
SNP10050	SNP14655	0.0244	0.000472	0.0348
SNP10050	SNP14681	0.00571	1.87e-05	0.00575
SNP10050	SNP14710	0.209	0.000573	0.181
SNP10050	SNP14753	0.000499	9.96e-07	0.000723
SNP10050	SNP14764	0.0018	3.76e-05	0.00175
SNP10050	SNP14771	0.00273	2.64e-06	0.00337
SNP10050	SNP1483	0.000302	1.77e-07	0.000321
SNP10050	SNP14836	0.0419	0.000616	0.0442
SNP10050	SNP14860	0.0239	0.000366	0.0265
SNP10050	SNP14867	0.00045	0.000166	0.000732
SNP10050	SNP14868	0.423	2.83e-05	0.45
SNP10050	SNP14909	0.00059	3.64e-06	0.000812
SNP10050	SNP14921	0.194	0.00086	0.194
SNP10050	SNP14945	0.0108	0.000185	0.00944
SNP10050	SNP14984	0.0199	0.000493	0.0241
SNP10050	SNP15002	0.00273	2.64e-06	0.00337
SNP10050	SNP15066	0.00483	4.44e-05	0.00646
SNP10050	SNP15103	0.0459	0.000917	0.0397
SNP10050	SNP15163	0.0191	4.45e-07	0.0318
SNP10050	SNP15288	0.00322	3.34e-05	0.00457
SNP10050	SNP15303	0.0364	0.000226	0.029
SNP10050	SNP15431	0.00273	2.64e-06	0.00337
SNP10050	SNP15451	0.0329	0.000455	0.0274
SNP10050	SNP15458	0.0582	0.000264	0.0557
SNP10050	SNP15475	0.000528	9.62e-07	0.000742
SNP10050	SNP15519	0.00885	8.97e-07	0.0116
SNP10050	SNP15534	0.00698	9.5e-05	0.0108
SNP10050	SNP15548	0.00953	6.34e-05	0.0118
SNP10050	SNP15552	0.764	0.000189	0.797
SNP10050	SNP15626	0.00412	3.34e-08	0.00435
SNP10050	SNP15652	0.0189	9.38e-05	0.0172
SNP10050	SNP15676	0.216	2.48e-06	0.254
SNP10050	SNP15717	0.00917	0.000763	0.00797
SNP10050	SNP15741	0.000714	0.000146	0.000908
SNP10050	SNP15861	0.000113	4.01e-10	0.000189
SNP10050	SNP15879	0.0618	0.000407	0.0717
SNP10050	SNP15899	0.0263	5.46e-05	0.034
SNP10050	SNP15925	0.0255	7.9e-05	0.0366
SNP10050	SNP15997	0.000493	3.62e-07	0.000662
SNP10050	SNP1601	0.215	6.52e-05	0.241
SNP10050	SNP16013	0.215	6.52e-05	0.241
SNP10050	SNP1606	0.0263	5.46e-05	0.034
SNP10050	SNP16072	4.92e-07	6.98e-15	7.03e-07
SNP10050	SNP16099	0.0592	0.000348	0.0537
SNP10050	SNP16100	0.00322	3.34e-05	0.00457
SNP10050	SNP16125	0.215	6.52e-05	0.241
SNP10050	SNP16128	0.00383	3.46e-09	0.0039
SNP10050	SNP16144	0.00149	2.14e-07	0.00209
SNP10050	SNP16160	0.0419	0.000616	0.0442
SNP10050	SNP162	0.00322	3.34e-05	0.00457
SNP10050	SNP16205	0.00107	1.91e-05	0.00182
SNP10050	SNP16222	0.00543	1.82e-06	0.00667
SNP10050	SNP16276	0.0351	0.000522	0.0389
SNP10050	SNP16278	0.0582	0.000264	0.0557
SNP10050	SNP16325	2.99e-05	4.47e-13	3.88e-05
SNP10050	SNP16358	4.88e-05	4.71e-13	5.99e-05
SNP10050	SNP16450	0.0582	0.000264	0.0557
SNP10050	SNP16491	0.00771	6.23e-06	0.00926
SNP10050	SNP16492	0.0171	1.91e-05	0.0202
SNP10050	SNP16498	0.0171	1.91e-05	0.0202
SNP10050	SNP16555	0.0043	0.000801	0.00347
SNP10050	SNP16590	0.000404	4.4e-06	0.000835
SNP10050	SNP16609	0.00917	1.81e-08	0.0164
SNP10050	SNP1665	0.0141	0.000145	0.0148
SNP10050	SNP16674	0.00704	4.7e-05	0.00787
SNP10050	SNP16686	0.0357	3.29e-07	0.0496
SNP10050	SNP16698	0.0702	8.17e-06	0.0887
SNP10050	SNP16788	0.067	8.18e-05	0.0742
SNP10050	SNP16804	0.0113	6.05e-05	0.0096
SNP10050	SNP16922	0.00784	0.000982	0.00921
SNP10050	SNP16952	0.175	0.000251	0.164
SNP10050	SNP16991	0.0236	0.000396	0.0266
SNP10050	SNP17089	0.0297	0.000363	0.0329
SNP10050	SNP17106	0.0018	3.76e-05	0.00175
SNP10050	SNP17111	0.0612	3.09e-05	0.0678
SNP10050	SNP17163	0.00513	7.69e-05	0.0101
SNP10050	SNP17180	0.0394	0.000186	0.0369
SNP10050	SNP17277	0.00446	0.000577	0.0051
SNP10050	SNP17367	0.00711	6.98e-05	0.00925
SNP10050	SNP17372	0.00953	6.34e-05	0.0118
SNP10050	SNP179	5.46e-05	1.58e-10	0.000103
SNP10050	SNP1804	0.0205	1.25e-06	0.0213
SNP10050	SNP1865	0.105	1.29e-06	0.0967
SNP10050	SNP1921	0.00397	1.69e-07	0.0048
SNP10050	SNP195	0.00965	3.83e-06	0.0126
SNP10050	SNP1955	0.00849	0.000386	0.0108
SNP10050	SNP1960	0.424	4.98e-05	0.469
SNP10050	SNP1963	5.37e-08	5.45e-16	6.2e-08
SNP10050	SNP2019	0.00808	0.000205	0.00731
SNP10050	SNP2024	0.00273	2.64e-06	0.00337
SNP10050	SNP2109	0.00259	0.000153	0.00258
SNP10050	SNP2116	1.9e-07	1.83e-16	4.94e-07
SNP10050	SNP2134	0.0824	0.000394	0.0715
SNP10050	SNP2141	0.0316	0.000202	0.0343
SNP10050	SNP2168	0.00539	1.2e-05	0.00708
SNP10050	SNP2215	0.274	0.000508	0.249
SNP10050	SNP2281	0.00059	3.64e-06	0.000812
SNP10050	SNP2311	7.04e-07	1.54e-15	1.24e-06
SNP10050	SNP2327	0.00059	3.64e-06	0.000812
SNP10050	SNP2328	0.00059	3.64e-06	0.000812
SNP10050	SNP2483	0.301	0.00061	0.339
SNP10050	SNP2484	0.35	0.000314	0.392
SNP10050	SNP2527	0.0104	0.000773	0.00938
SNP10050	SNP2544	3.35e-06	4.66e-13	3.06e-06
SNP10050	SNP2604	7.38e-08	1.13e-16	1.27e-07
SNP10050	SNP2646	0.00311	0.000685	0.00365
SNP10050	SNP2702	2.94e-05	1.24e-12	4.64e-05
SNP10050	SNP2707	0.00627	1.3e-07	0.00529
SNP10050	SNP2793	0.0296	2.29e-05	0.0295
SNP10050	SNP2794	0.00358	0.000253	0.00339
SNP10050	SNP2807	0.979	0.00066	0.989
SNP10050	SNP2909	0.00753	0.000221	0.00732
SNP10050	SNP2953	3.85e-06	2e-07	6.24e-06
SNP10050	SNP2983	0.000207	2.63e-09	0.000208
SNP10050	SNP3002	0.00091	9.28e-07	0.00109
SNP10050	SNP3024	0.0156	0.000361	0.0198
SNP10050	SNP3118	0.00711	6.98e-05	0.00925
SNP10050	SNP3173	0.00059	3.64e-06	0.000812
SNP10050	SNP3240	0.000714	0.000146	0.000908
SNP10050	SNP3260	0.00466	1.61e-05	0.00558
SNP10050	SNP3261	0.00466	1.61e-05	0.00558
SNP10050	SNP327	0.011	0.000422	0.0129
SNP10050	SNP332	0.000714	0.000146	0.000908
SNP10050	SNP3345	0.549	9.83e-05	0.595
SNP10050	SNP335	0.344	0.000708	0.334
SNP10050	SNP3398	0.184	0.000823	0.176
SNP10050	SNP3408	0.215	6.52e-05	0.241
SNP10050	SNP3555	0.00292	0.000101	0.00466
SNP10050	SNP3567	0.0148	0.000813	0.0164
SNP10050	SNP3759	0.0187	0.000146	0.0229
SNP10050	SNP3803	7.28e-06	1.92e-11	1.2e-05
SNP10050	SNP3905	0.00175	1.52e-08	0.00186
SNP10050	SNP3906	1.21e-05	7.94e-12	1.27e-05
SNP10050	SNP3984	0.0278	0.000245	0.0327
SNP10050	SNP4070	6.09e-05	2.15e-12	9.03e-05
SNP10050	SNP4073	0.026	6.12e-05	0.0286
SNP10050	SNP4102	0.00784	0.000982	0.00921
SNP10050	SNP4153	0.0316	5.74e-05	0.0346
SNP10050	SNP4169	0.0824	0.000394	0.0715
SNP10050	SNP4223	9.56e-07	1.41e-13	9.6e-07
SNP10050	SNP4299	0.979	0.00066	0.989
SNP10050	SNP4328	0.000151	1.16e-11	0.000219
SNP10050	SNP4331	0.00812	0.000857	0.00874
SNP10050	SNP4376	0.00571	1.87e-05	0.00575
SNP10050	SNP4407	0.0146	0.000718	0.0113
SNP10050	SNP4412	0.00347	0.000632	0.00467
SNP10050	SNP4423	0.0283	9.6e-05	0.0379
SNP10050	SNP4463	0.0185	0.000279	0.0264
SNP10050	SNP4476	0.0303	0.000258	0.0387
SNP10050	SNP4508	0.00953	6.34e-05	0.0118
SNP10050	SNP453	0.00102	4.32e-09	0.00145
SNP10050	SNP4562	0.0019	1.71e-05	0.00358
SNP10050	SNP4588	0.000911	1.48e-07	0.000829
SNP10050	SNP46	0.00348	6.08e-08	0.00286
SNP10050	SNP4602	0.00885	0.000143	0.00971
SNP10050	SNP4632	0.00198	0.00014	0.00212
SNP10050	SNP4659	0.101	0.0005	0.107
SNP10050	SNP4664	1.32e-22	1.44e-40	6.64e-22
SNP10050	SNP4696	0.0177	0.000364	0.0183
SNP10050	SNP4819	0.0202	6.44e-05	0.0268
SNP10050	SNP4876	0.0104	0.000773	0.00938
SNP10050	SNP4930	0.00438	3.35e-06	0.0053
SNP10050	SNP4980	0.0113	6.05e-05	0.0096
SNP10050	SNP4984	0.215	6.52e-05	0.241
SNP10050	SNP5024	0.0183	0.000882	0.0216
SNP10050	SNP5025	0.0271	0.000284	0.0314
SNP10050	SNP5053	0.0838	3.11e-05	0.0887
SNP10050	SNP5086	0.00155	0.000122	0.00145
SNP10050	SNP5143	0.00784	0.000982	0.00921
SNP10050	SNP5180	0.00473	0.00077	0.00609
SNP10050	SNP5210	1.62e-07	6.4e-15	4.01e-07
SNP10050	SNP5211	1.62e-07	6.4e-15	4.01e-07
SNP10050	SNP5212	0.000767	3.12e-07	0.000793
SNP10050	SNP5223	0.166	4.29e-06	0.177
SNP10050	SNP5230	5.89e-05	8.02e-13	5.97e-05
SNP10050	SNP5234	0.203	6.61e-06	0.185
SNP10050	SNP526	0.0222	2.72e-06	0.0263
SNP10050	SNP5275	0.00473	0.00077	0.00609
SNP10050	SNP5303	0.05	9.79e-05	0.0599
SNP10050	SNP5308	0.215	6.52e-05	0.241
SNP10050	SNP5349	0.016	0.000184	0.0127
SNP10050	SNP5369	0.0104	0.000773	0.00938
SNP10050	SNP5380	0.000176	1.31e-05	0.000126
SNP10050	SNP5396	0.183	1.36e-06	0.193
SNP10050	SNP5500	0.0125	0.000104	0.0142
SNP10050	SNP5559	0.00513	7.69e-05	0.0101
SNP10050	SNP5585	6.29e-10	2.5e-21	8.51e-10
SNP10050	SNP5629	0.00999	0.000306	0.0131
SNP10050	SNP5631	0.0237	7.74e-05	0.026
SNP10050	SNP5644	0.00408	3.21e-08	0.00449
SNP10050	SNP5646	0.0063	5.58e-05	0.00723
SNP10050	SNP5740	0.00451	6.48e-05	0.00419
SNP10050	SNP5753	0.00383	3.46e-09	0.0039
SNP10050	SNP5805	0.00784	0.000982	0.00921
SNP10050	SNP5811	2.65e-05	2.7e-14	3.63e-05
SNP10050	SNP5812	2.65e-05	2.7e-14	3.63e-05
SNP10050	SNP5856	0.183	1.36e-06	0.193
SNP10050	SNP5857	0.00116	1.02e-05	0.00215
SNP10050	SNP5866	0.00273	2.64e-06	0.00337
SNP10050	SNP5883	3.15e-08	1.87e-18	5.06e-08
SNP10050	SNP5954	0.000165	2.95e-06	0.000474
SNP10050	SNP600	1.84e-10	1.06e-23	3.54e-10
SNP10050	SNP6002	0.00207	2.21e-05	0.00256
SNP10050	SNP601	6.98e-09	1.05e-19	1.06e-08
SNP10050	SNP6019	1.26e-11	4.04e-24	2.49e-11
SNP10050	SNP6163	0.00171	8.85e-07	0.00235
SNP10050	SNP6217	0.923	0.000581	0.972
SNP10050	SNP6310	0.0956	0.000681	0.102
SNP10050	SNP6333	0.0152	1.02e-06	0.0182
SNP10050	SNP6355	0.0419	0.000616	0.0442
SNP10050	SNP6361	0.0151	2.13e-05	0.0182
SNP10050	SNP6373	0.000664	2.56e-05	0.000691
SNP10050	SNP6404	0.00136	1.85e-09	0.00147
SNP10050	SNP6485	0.0167	2.93e-07	0.0219
SNP10050	SNP6632	0.00682	2.75e-05	0.00968
SNP10050	SNP6778	0.0125	0.000104	0.0142
SNP10050	SNP6817	0.135	0.000136	0.168
SNP10050	SNP6831	0.0105	1.54e-07	0.0233
SNP10050	SNP6853	0.000599	6.72e-09	0.000883
SNP10050	SNP7019	0.467	0.0008	0.473
SNP10050	SNP7083	0.0394	0.000186	0.0369
SNP10050	SNP7110	0.00171	8.85e-07	0.00235
SNP10050	SNP7123	0.144	0.000321	0.147
SNP10050	SNP7163	5.51e-13	4.64e-27	1.3e-12
SNP10050	SNP7187	1.92e-10	2.2e-20	1.23e-09
SNP10050	SNP7208	0.076	6.54e-06	0.11
SNP10050	SNP7216	0.000101	0.00112	9.64e-05
SNP10050	SNP7243	2.89e-13	2.33e-26	8.23e-13
SNP10050	SNP7252	0.0401	0.000454	0.0503
SNP10050	SNP7320	0.031	2.7e-05	0.0422
SNP10050	SNP7374	0.00408	3.21e-08	0.00449
SNP10050	SNP7411	0.019	0.000276	0.0289
SNP10050	SNP7447	0.0419	0.000616	0.0442
SNP10050	SNP7467	0.0253	0.000161	0.0335
SNP10050	SNP748	0.0094	0.000609	0.00833
SNP10050	SNP7528	0.0249	0.000833	0.0246
SNP10050	SNP7581	0.00273	2.64e-06	0.00337
SNP10050	SNP7590	0.0104	0.000773	0.00938
SNP10050	SNP768	0.00741	0.000174	0.0141
SNP10050	SNP7722	0.158	5.88e-06	0.153
SNP10050	SNP7748	0.076	6.54e-06	0.11
SNP10050	SNP7857	0.509	7.45e-05	0.553
SNP10050	SNP7897	0.0125	0.000104	0.0142
SNP10050	SNP7903	3.11e-05	3.53e-09	3.49e-05
SNP10050	SNP7952	0.0154	1.18e-05	0.022
SNP10050	SNP7974	0.00171	8.85e-07	0.00235
SNP10050	SNP8000	0.00273	2.64e-06	0.00337
SNP10050	SNP8061	0.0593	0.000717	0.0628
SNP10050	SNP8247	0.509	7.45e-05	0.553
SNP10050	SNP8270	5.37e-08	5.45e-16	6.2e-08
SNP10050	SNP8335	0.0296	0.000498	0.0354
SNP10050	SNP843	0.215	6.52e-05	0.241
SNP10050	SNP8467	9.56e-07	1.41e-13	9.6e-07
SNP10050	SNP8470	0.00412	3.34e-08	0.00435
SNP10050	SNP8559	0.02	0.000783	0.0221
SNP10050	SNP8567	0.0138	3.58e-05	0.0193
SNP10050	SNP8591	0.216	2.48e-06	0.254
SNP10050	SNP8770	0.00337	0.000127	0.00475
SNP10050	SNP8877	6.25e-07	4.09e-14	5.86e-07
SNP10050	SNP8944	0.00473	0.00077	0.00609
SNP10050	SNP8978	0.000129	7.9e-10	0.000136
SNP10050	SNP9030	0.00171	8.85e-07	0.00235
SNP10050	SNP9049	0.424	4.98e-05	0.469
SNP10050	SNP9071	2.48e-18	2.6e-34	9.95e-18
SNP10050	SNP9094	0.00885	8.97e-07	0.0116
SNP10050	SNP9100	0.00827	2.63e-06	0.00831
SNP10050	SNP9227	1.62e-06	4.98e-15	2.83e-06
SNP10050	SNP9421	0.000391	0.000441	0.00036
SNP10050	SNP9488	0.0838	3.11e-05	0.0887
SNP10050	SNP9498	0.00965	3.83e-06	0.0126
SNP10050	SNP9543	0.519	4.58e-05	0.539
SNP10050	SNP9585	0.402	0.00012	0.387
SNP10050	SNP9639	0.0357	3.29e-07	0.0496
SNP10050	SNP964	0.0376	0.000579	0.0448
SNP10050	SNP9640	0.0357	3.29e-07	0.0496
SNP10050	SNP9643	1.14e-11	2.05e-23	4.4e-11
SNP10050	SNP9741	0.00697	1.36e-05	0.00955
SNP10050	SNP9804	0.01	1.87e-05	0.0109
SNP10050	SNP9828	0.031	0.00075	0.0328
SNP10050	SNP9877	0.131	1.35e-05	0.119
SNP10050	SNP9882	4.28e-12	3.36e-24	1.05e-11
SNP10050	SNP9913	0.00784	0.000982	0.00921
SNP10050	SNP994	0.00155	0.000122	0.00145
SNP10050	SNP9966	0.0125	0.000193	0.0159
SNP10052	SNP10089	0.00895	0.000744	0.00984
SNP10052	SNP10429	0.00895	0.000744	0.00984
SNP10052	SNP10698	0.0133	0.000342	0.012
SNP10052	SNP11341	0.0726	0.000905	0.0682
SNP10052	SNP1220	0.00929	5.97e-05	0.00947
SNP10052	SNP12586	0.0374	0.000404	0.0451
SNP10052	SNP13024	0.00895	0.000744	0.00984
SNP10052	SNP13402	0.0235	2.08e-05	0.0239
SNP10052	SNP13680	0.0205	0.000465	0.0224
SNP10052	SNP143	0.00895	0.000744	0.00984
SNP10052	SNP15427	0.00929	5.97e-05	0.00947
SNP10052	SNP15428	0.00929	5.97e-05	0.00947
SNP10052	SNP15429	0.00929	5.97e-05	0.00947
SNP10052	SNP15430	0.00929	5.97e-05	0.00947
SNP10052	SNP15691	0.0205	0.000465	0.0224
SNP10052	SNP15879	0.0193	0.000949	0.0198
SNP10052	SNP16225	0.0374	0.000404	0.0451
SNP10052	SNP17249	0.00895	0.000744	0.00984
SNP10052	SNP176	0.0133	0.000342	0.012
SNP10052	SNP3195	0.0588	0.000671	0.0579
SNP10052	SNP3418	0.0298	0.000471	0.0294
SNP10052	SNP3419	0.0371	0.000694	0.0362
SNP10052	SNP4388	0.00895	0.000744	0.00984
SNP10052	SNP4894	0.0205	0.000465	0.0224
SNP10052	SNP7955	0.0104	0.000218	0.009
SNP10052	SNP9100	0.0726	0.000905	0.0682
SNP10052	SNP9540	0.00929	5.97e-05	0.00947
SNP10052	SNP9625	0.00688	0.000578	0.00804
SNP1006	SNP10397	0.00106	4.86e-05	0.00141
SNP1006	SNP10670	0.00219	0.000114	0.00265
SNP1006	SNP10856	0.000698	8.15e-05	0.0009
SNP1006	SNP11033	0.00603	0.000293	0.00657
SNP1006	SNP11103	0.00146	0.000288	0.00202
SNP1006	SNP11341	0.000267	5.42e-06	0.000386
SNP1006	SNP11379	0.000868	1.56e-05	0.000944
SNP1006	SNP1164	0.00177	9.53e-05	0.00144
SNP1006	SNP11671	0.00554	0.00024	0.00559
SNP1006	SNP11715	0.00153	0.000104	0.00148
SNP1006	SNP11730	0.013	0.000546	0.0136
SNP1006	SNP11817	0.00554	0.00024	0.00559
SNP1006	SNP11856	0.00195	7.06e-05	0.00197
SNP1006	SNP12061	0.0142	0.000594	0.0147
SNP1006	SNP1227	0.00109	9.12e-05	0.00101
SNP1006	SNP12828	0.011	0.000738	0.013
SNP1006	SNP13083	0.0052	0.000291	0.00647
SNP1006	SNP13118	0.00109	9.12e-05	0.00101
SNP1006	SNP13402	0.000367	1.15e-05	0.000493
SNP1006	SNP13554	0.00784	0.000823	0.00417
SNP1006	SNP13555	0.00784	0.000823	0.00417
SNP1006	SNP13556	0.00676	0.000874	0.00457
SNP1006	SNP13557	0.00784	0.000823	0.00417
SNP1006	SNP1376	0.000561	1.88e-05	0.000732
SNP1006	SNP14151	0.0161	0.000739	0.02
SNP1006	SNP14506	0.000561	1.88e-05	0.000732
SNP1006	SNP14993	0.0017	9.59e-05	0.00109
SNP1006	SNP15173	0.00109	9.12e-05	0.00101
SNP1006	SNP15626	0.00618	0.000834	0.00891
SNP1006	SNP15760	0.0011	0.000186	0.00114
SNP1006	SNP15839	0.00909	0.000192	0.00217
SNP1006	SNP16106	0.00109	9.12e-05	0.00101
SNP1006	SNP16294	0.00652	0.000441	0.00668
SNP1006	SNP16637	0.00254	8.25e-05	0.00425
SNP1006	SNP17292	0.00116	0.000508	0.0013
SNP1006	SNP1804	0.00554	0.000753	0.00847
SNP1006	SNP1929	0.00116	0.000508	0.0013
SNP1006	SNP2109	0.00131	0.000991	0.00359
SNP1006	SNP2239	0.00078	1.53e-05	0.000919
SNP1006	SNP2409	0.00234	0.000589	0.00245
SNP1006	SNP2410	0.00234	0.000589	0.00245
SNP1006	SNP2516	0.000785	8.36e-05	0.000898
SNP1006	SNP2964	0.000438	5.54e-06	0.000739
SNP1006	SNP3050	0.00109	9.12e-05	0.00101
SNP1006	SNP321	0.0043	0.00023	0.00539
SNP1006	SNP330	0.000868	1.56e-05	0.000944
SNP1006	SNP3658	0.00554	0.00024	0.00559
SNP1006	SNP3788	0.000515	0.000134	0.000461
SNP1006	SNP388	0.00478	0.00024	0.00554
SNP1006	SNP389	0.00478	0.00024	0.00554
SNP1006	SNP390	0.00478	0.00024	0.00554
SNP1006	SNP3900	0.000976	0.000339	0.00137
SNP1006	SNP3901	0.000887	0.00029	0.00121
SNP1006	SNP3905	0.00207	0.000237	0.00298
SNP1006	SNP4009	0.000554	1.15e-05	0.000506
SNP1006	SNP4577	0.00784	0.000823	0.00417
SNP1006	SNP4658	0.00483	0.000953	0.00421
SNP1006	SNP4735	0.002	0.0003	0.00217
SNP1006	SNP4964	0.000859	6.77e-05	0.00076
SNP1006	SNP5051	0.00182	0.000393	0.00158
SNP1006	SNP5331	0.000806	2.51e-05	0.000477
SNP1006	SNP5447	0.00378	0.000191	0.00462
SNP1006	SNP5454	0.0043	0.00023	0.00539
SNP1006	SNP5483	0.00146	0.000288	0.00202
SNP1006	SNP5644	0.00631	0.000913	0.00938
SNP1006	SNP5900	0.000868	1.56e-05	0.000944
SNP1006	SNP6280	0.00676	0.000874	0.00457
SNP1006	SNP637	0.00175	9.58e-05	0.00148
SNP1006	SNP652	0.00454	0.000229	0.00482
SNP1006	SNP6633	0.0024	0.000957	0.0041
SNP1006	SNP6768	0.00603	0.000293	0.00657
SNP1006	SNP7000	0.00144	7.46e-05	0.00111
SNP1006	SNP7075	0.0011	0.000186	0.00114
SNP1006	SNP7123	0.000644	1.15e-05	0.000693
SNP1006	SNP7374	0.00631	0.000913	0.00938
SNP1006	SNP7463	0.00478	0.00024	0.00554
SNP1006	SNP7640	0.00106	9.21e-05	0.00093
SNP1006	SNP7943	0.000934	0.000461	0.00114
SNP1006	SNP7991	0.000859	1.56e-05	0.00094
SNP1006	SNP8050	0.00161	8.42e-05	0.0013
SNP1006	SNP8051	0.00189	0.000166	0.00225
SNP1006	SNP8192	0.00121	5.18e-05	0.000766
SNP1006	SNP8216	0.000806	2.51e-05	0.000477
SNP1006	SNP8358	0.000656	8.36e-05	0.000905
SNP1006	SNP8470	0.00618	0.000834	0.00891
SNP1006	SNP8717	0.00159	6.88e-05	0.00112
SNP1006	SNP8870	0.0012	5.47e-05	0.00136
SNP1006	SNP9032	0.00919	0.000515	0.0114
SNP1006	SNP904	0.00078	1.53e-05	0.000919
SNP1006	SNP9077	0.00168	2.59e-05	0.00184
SNP1006	SNP9100	0.000267	5.42e-06	0.000386
SNP1006	SNP93	0.000348	2.74e-05	0.000354
SNP1006	SNP9301	0.00088	8.52e-05	0.000967
SNP1006	SNP9324	0.00129	9.11e-05	0.00102
SNP1006	SNP938	0.00161	8.42e-05	0.0013
SNP1006	SNP9396	0.00173	0.000294	0.00232
SNP1006	SNP9807	0.00109	9.12e-05	0.00101
SNP1006	SNP9995	0.00128	7.48e-05	0.000794
SNP10089	SNP10360	0.0192	3.5e-05	0.015
SNP10089	SNP10361	0.139	0.000942	0.162
SNP10089	SNP10379	0.000113	5.81e-09	0.000172
SNP10089	SNP10646	0.000349	2.18e-07	0.000343
SNP10089	SNP10647	0.00924	2.62e-05	0.00895
SNP10089	SNP10654	0.00386	0.000111	0.00361
SNP10089	SNP10970	0.0401	0.000799	0.046
SNP10089	SNP11272	0.00502	3.86e-06	0.00654
SNP10089	SNP11341	0.00102	1.41e-05	0.00108
SNP10089	SNP11352	0.0154	8.02e-05	0.0136
SNP10089	SNP11353	0.0154	8.02e-05	0.0136
SNP10089	SNP11463	2.77e-06	5.51e-11	3.92e-06
SNP10089	SNP12159	8.54e-05	2.48e-08	8.52e-05
SNP10089	SNP12827	0.00828	0.000314	0.00916
SNP10089	SNP12983	0.0192	3.5e-05	0.015
SNP10089	SNP13172	0.025	0.000852	0.0258
SNP10089	SNP13392	0.0192	3.5e-05	0.015
SNP10089	SNP13402	0.0113	0.000757	0.0122
SNP10089	SNP13767	0.0154	8.02e-05	0.0136
SNP10089	SNP13838	0.00389	7.54e-05	0.00386
SNP10089	SNP14066	0.0152	3.14e-05	0.0214
SNP10089	SNP14067	0.00496	7.04e-06	0.0081
SNP10089	SNP14089	4.19e-05	1.47e-08	5.45e-05
SNP10089	SNP14137	0.119	0.000532	0.142
SNP10089	SNP14582	0.0055	0.000118	0.00559
SNP10089	SNP14922	0.00604	5.16e-05	0.00672
SNP10089	SNP15005	0.00286	0.000822	0.00246
SNP10089	SNP15032	0.00348	0.000115	0.00318
SNP10089	SNP15163	0.0504	0.000104	0.0469
SNP10089	SNP15294	0.00622	0.000655	0.00516
SNP10089	SNP15326	0.00076	1.03e-05	0.000759
SNP10089	SNP15342	0.00622	0.000655	0.00516
SNP10089	SNP15445	0.00389	7.54e-05	0.00386
SNP10089	SNP15519	0.139	0.000942	0.162
SNP10089	SNP15852	0.00622	0.000655	0.00516
SNP10089	SNP15853	0.00622	0.000655	0.00516
SNP10089	SNP15861	0.0373	8.73e-05	0.0393
SNP10089	SNP1601	0.0154	8.02e-05	0.0136
SNP10089	SNP16013	0.0154	8.02e-05	0.0136
SNP10089	SNP16072	0.0392	2.99e-05	0.0415
SNP10089	SNP16125	0.0154	8.02e-05	0.0136
SNP10089	SNP16128	0.00473	6.7e-06	0.00458
SNP10089	SNP16325	0.104	0.000395	0.096
SNP10089	SNP16358	0.0868	0.000264	0.0806
SNP10089	SNP16609	0.0206	3.02e-05	0.0207
SNP10089	SNP16686	0.0014	2.36e-06	0.00123
SNP10089	SNP16698	0.00838	2.61e-05	0.00756
SNP10089	SNP179	0.0152	3.14e-05	0.0214
SNP10089	SNP2116	0.00349	1.34e-06	0.00544
SNP10089	SNP2134	0.00386	0.000111	0.00361
SNP10089	SNP2215	0.00658	0.000183	0.0076
SNP10089	SNP2311	0.00131	3.59e-07	0.00163
SNP10089	SNP2483	0.0227	0.000289	0.0182
SNP10089	SNP2484	0.0471	0.000461	0.0431
SNP10089	SNP2604	0.0225	3.96e-05	0.0298
SNP10089	SNP2702	0.00905	4.75e-06	0.012
SNP10089	SNP3408	0.0154	8.02e-05	0.0136
SNP10089	SNP344	0.00622	0.000655	0.00516
SNP10089	SNP3803	0.0376	0.00032	0.0417
SNP10089	SNP4009	0.00276	0.000403	0.00284
SNP10089	SNP4070	7.51e-05	3.43e-08	9.99e-05
SNP10089	SNP4169	0.00386	0.000111	0.00361
SNP10089	SNP4328	0.000216	1.33e-07	0.000288
SNP10089	SNP4664	2.77e-06	5.51e-11	3.92e-06
SNP10089	SNP4940	0.00622	0.000655	0.00516
SNP10089	SNP4984	0.0154	8.02e-05	0.0136
SNP10089	SNP5210	0.00145	2.94e-07	0.00219
SNP10089	SNP5211	0.00145	2.94e-07	0.00219
SNP10089	SNP5308	0.0154	8.02e-05	0.0136
SNP10089	SNP5585	0.000217	4.01e-08	0.000262
SNP10089	SNP5753	0.00473	6.7e-06	0.00458
SNP10089	SNP577	0.0202	0.000606	0.0182
SNP10089	SNP5811	8.54e-05	2.48e-08	8.52e-05
SNP10089	SNP5812	8.54e-05	2.48e-08	8.52e-05
SNP10089	SNP5883	0.00354	1.74e-06	0.00408
SNP10089	SNP600	4.84e-05	3.74e-09	6.45e-05
SNP10089	SNP601	0.000204	4.75e-08	0.000248
SNP10089	SNP6019	5.77e-05	8.96e-09	7.11e-05
SNP10089	SNP6182	0.00368	0.000238	0.00376
SNP10089	SNP6333	0.00895	0.000242	0.0112
SNP10089	SNP6361	0.0401	0.000799	0.046
SNP10089	SNP6485	0.00961	1.48e-05	0.00797
SNP10089	SNP6831	0.0317	8.53e-05	0.0287
SNP10089	SNP6853	0.265	0.00099	0.211
SNP10089	SNP6904	0.000206	6.04e-07	0.000194
SNP10089	SNP7123	0.000272	5.06e-06	0.000256
SNP10089	SNP7133	0.0055	0.000118	0.00559
SNP10089	SNP7163	0.000257	2.43e-08	0.000333
SNP10089	SNP7187	0.00463	2.1e-06	0.00567
SNP10089	SNP7243	0.00238	7.12e-07	0.00327
SNP10089	SNP843	0.0154	8.02e-05	0.0136
SNP10089	SNP9071	0.00113	1.55e-07	0.00166
SNP10089	SNP9094	0.139	0.000942	0.162
SNP10089	SNP9100	0.00102	1.41e-05	0.00108
SNP10089	SNP9227	0.00223	6.69e-07	0.00271
SNP10089	SNP9576	0.00604	5.16e-05	0.00672
SNP10089	SNP9577	0.00604	5.16e-05	0.00672
SNP10089	SNP9639	0.0014	2.36e-06	0.00123
SNP10089	SNP9640	0.0014	2.36e-06	0.00123
SNP10089	SNP9643	4.41e-05	1.58e-08	7.03e-05
SNP10089	SNP9783	0.00389	7.54e-05	0.00386
SNP10089	SNP9877	0.0178	0.000101	0.0188
SNP10089	SNP9882	6.11e-06	9e-10	9.26e-06
SNP10100	SNP10327	0.00236	0.00041	0.00225
SNP10100	SNP10373	0.00177	3.79e-05	0.00173
SNP10100	SNP10379	0.00263	0.000123	0.00284
SNP10100	SNP10729	0.00643	0.000801	0.00678
SNP10100	SNP11404	0.00277	0.000312	0.00293
SNP10100	SNP11449	0.00388	0.00087	0.00413
SNP10100	SNP11462	0.00838	0.000106	0.0099
SNP10100	SNP11463	0.0018	5.28e-05	0.00193
SNP10100	SNP11686	0.004	0.000123	0.00418
SNP10100	SNP11874	0.00287	0.000182	0.00271
SNP10100	SNP11892	0.00399	0.000445	0.00422
SNP10100	SNP12116	0.00018	0.000262	0.000187
SNP10100	SNP12221	0.00775	0.000749	0.00761
SNP10100	SNP12523	0.00177	3.79e-05	0.00173
SNP10100	SNP12579	0.0016	0.000166	0.00215
SNP10100	SNP12742	2.8e-05	1.47e-05	3.46e-05
SNP10100	SNP12755	0.00388	0.00087	0.00413
SNP10100	SNP1281	0.00868	0.000959	0.00848
SNP10100	SNP12944	0.00916	0.000892	0.00849
SNP10100	SNP13791	0.00473	0.00063	0.00613
SNP10100	SNP13806	0.00368	0.000142	0.00399
SNP10100	SNP13863	0.00473	0.00063	0.00613
SNP10100	SNP13997	0.0016	0.000166	0.00215
SNP10100	SNP14485	0.00127	0.000135	0.00149
SNP10100	SNP14654	0.0142	0.000979	0.0152
SNP10100	SNP14655	0.0142	0.000979	0.0152
SNP10100	SNP14753	0.00926	0.0004	0.00983
SNP10100	SNP14787	0.000567	0.000208	0.000707
SNP10100	SNP15458	0.00231	0.000223	0.00237
SNP10100	SNP15534	0.00502	0.000237	0.00495
SNP10100	SNP15652	0.00775	0.000749	0.00761
SNP10100	SNP15825	0.000921	0.00189	0.00103
SNP10100	SNP15920	0.0016	0.000166	0.00215
SNP10100	SNP16251	0.0016	0.000166	0.00215
SNP10100	SNP16278	0.00231	0.000223	0.00237
SNP10100	SNP16299	0.00388	0.00087	0.00413
SNP10100	SNP16300	0.00388	0.00087	0.00413
SNP10100	SNP16450	0.00231	0.000223	0.00237
SNP10100	SNP16476	0.00916	0.000892	0.00849
SNP10100	SNP16762	0.00698	0.000816	0.00709
SNP10100	SNP16930	0.00698	0.000816	0.00709
SNP10100	SNP16991	0.00196	0.000752	0.0019
SNP10100	SNP17163	0.004	0.000123	0.00418
SNP10100	SNP17180	0.00429	0.000515	0.00424
SNP10100	SNP1725	0.00698	0.000816	0.00709
SNP10100	SNP17368	0.00177	3.79e-05	0.00173
SNP10100	SNP1778	0.000123	1.19e-06	0.000119
SNP10100	SNP313	0.0016	0.000166	0.00215
SNP10100	SNP336	0.000921	0.00189	0.00103
SNP10100	SNP3947	0.00468	0.000494	0.00555
SNP10100	SNP4356	0.00713	0.000491	0.00766
SNP10100	SNP4476	0.0179	0.000769	0.0194
SNP10100	SNP4562	0.00368	0.000142	0.00399
SNP10100	SNP4664	0.0018	5.28e-05	0.00193
SNP10100	SNP4887	0.00916	0.000892	0.00849
SNP10100	SNP4888	0.0048	0.000409	0.0046
SNP10100	SNP5180	0.00018	0.000262	0.000187
SNP10100	SNP5242	0.000556	0.00123	0.000567
SNP10100	SNP5275	0.00018	0.000262	0.000187
SNP10100	SNP5377	0.00603	0.000499	0.00557
SNP10100	SNP5466	0.000567	0.000208	0.000707
SNP10100	SNP5559	0.004	0.000123	0.00418
SNP10100	SNP5645	0.00916	0.000892	0.00849
SNP10100	SNP575	0.00698	0.000816	0.00709
SNP10100	SNP5862	0.00916	0.000892	0.00849
SNP10100	SNP5897	0.000921	0.00189	0.00103
SNP10100	SNP6030	0.000941	0.000286	0.000923
SNP10100	SNP6032	0.000941	0.000286	0.000923
SNP10100	SNP6237	0.0016	0.000166	0.00215
SNP10100	SNP6351	0.0016	0.000166	0.00215
SNP10100	SNP7048	0.0016	0.000166	0.00215
SNP10100	SNP7070	0.000178	0.000124	0.000187
SNP10100	SNP7083	0.00429	0.000515	0.00424
SNP10100	SNP7204	0.000921	0.00189	0.00103
SNP10100	SNP7411	0.0133	0.000993	0.0155
SNP10100	SNP7427	0.00603	0.000499	0.00557
SNP10100	SNP7597	0.000921	0.00189	0.00103
SNP10100	SNP7883	0.0016	0.000166	0.00215
SNP10100	SNP8369	0.00916	0.000892	0.00849
SNP10100	SNP8425	0.0016	0.000166	0.00215
SNP10100	SNP8601	0.00388	0.00087	0.00413
SNP10100	SNP8705	0.000921	0.00189	0.00103
SNP10100	SNP8721	0.00177	3.79e-05	0.00173
SNP10100	SNP886	0.00529	0.000516	0.00616
SNP10100	SNP8872	0.00388	0.00087	0.00413
SNP10100	SNP8873	0.00388	0.00087	0.00413
SNP10100	SNP8941	0.00399	0.000445	0.00422
SNP10100	SNP8942	0.00399	0.000445	0.00422
SNP10100	SNP8944	0.00018	0.000262	0.000187
SNP10100	SNP8954	0.00055	0.000424	0.000613
SNP10100	SNP9071	0.0016	7.21e-05	0.0016
SNP10100	SNP9085	0.00177	3.79e-05	0.00173
SNP10100	SNP9765	0.00388	0.00087	0.00413
SNP10100	SNP9766	0.00388	0.00087	0.00413
SNP10100	SNP9771	0.00177	3.79e-05	0.00173
SNP10118	SNP10360	0.186	0.000558	0.163
SNP10118	SNP10365	0.0415	0.000564	0.0411
SNP10118	SNP10379	0.000413	1.89e-08	0.000593
SNP10118	SNP10646	0.00252	1.52e-06	0.00253
SNP10118	SNP10647	0.0382	0.000118	0.0364
SNP10118	SNP10654	0.025	0.000689	0.0262
SNP10118	SNP10970	0.0255	0.000304	0.026
SNP10118	SNP11272	0.00724	6.02e-06	0.00873
SNP10118	SNP11327	0.00843	0.000198	0.0102
SNP10118	SNP11341	0.00439	7.54e-05	0.00441
SNP10118	SNP11463	3.21e-05	4.39e-10	4.13e-05
SNP10118	SNP11480	0.105	0.000745	0.104
SNP10118	SNP12159	0.000761	1.98e-07	0.000802
SNP10118	SNP12983	0.186	0.000558	0.163
SNP10118	SNP13392	0.186	0.000558	0.163
SNP10118	SNP13838	0.04	0.00093	0.0482
SNP10118	SNP14066	0.0229	3.97e-05	0.0249
SNP10118	SNP14067	0.00721	8.23e-06	0.00898
SNP10118	SNP14089	3.73e-05	4.63e-09	4.96e-05
SNP10118	SNP14137	0.168	0.000663	0.159
SNP10118	SNP1441	0.0142	0.000481	0.0145
SNP10118	SNP14922	0.0115	2.95e-05	0.0138
SNP10118	SNP15032	0.0213	0.000701	0.0224
SNP10118	SNP15163	0.0511	6.08e-05	0.0547
SNP10118	SNP15294	0.0093	0.000533	0.00924
SNP10118	SNP15326	0.0108	0.000164	0.014
SNP10118	SNP15342	0.0093	0.000533	0.00924
SNP10118	SNP15445	0.04	0.00093	0.0482
SNP10118	SNP15839	0.00533	0.000633	0.00597
SNP10118	SNP15852	0.0093	0.000533	0.00924
SNP10118	SNP15853	0.0093	0.000533	0.00924
SNP10118	SNP15861	0.0518	0.000208	0.0637
SNP10118	SNP16072	0.0458	3.98e-05	0.0486
SNP10118	SNP16128	0.022	3.31e-05	0.0212
SNP10118	SNP16325	0.0197	2.47e-05	0.0188
SNP10118	SNP16358	0.0149	1.44e-05	0.014
SNP10118	SNP16609	0.246	0.000764	0.254
SNP10118	SNP16686	0.0315	7.49e-05	0.0339
SNP10118	SNP16698	0.00139	9.27e-07	0.00121
SNP10118	SNP16952	0.00843	0.000198	0.0102
SNP10118	SNP179	0.0229	3.97e-05	0.0249
SNP10118	SNP195	0.0609	0.000788	0.0591
SNP10118	SNP2116	0.0237	2.91e-05	0.0327
SNP10118	SNP2134	0.025	0.000689	0.0262
SNP10118	SNP2215	0.0141	0.000366	0.0163
SNP10118	SNP2311	0.00252	4.03e-07	0.00311
SNP10118	SNP2604	0.0239	3.82e-05	0.0299
SNP10118	SNP2702	0.0162	4.87e-06	0.0192
SNP10118	SNP3260	0.00538	0.000412	0.00639
SNP10118	SNP3261	0.00538	0.000412	0.00639
SNP10118	SNP344	0.0093	0.000533	0.00924
SNP10118	SNP3803	0.0195	0.00011	0.0221
SNP10118	SNP4070	7.17e-05	1.26e-08	9.9e-05
SNP10118	SNP4169	0.025	0.000689	0.0262
SNP10118	SNP4328	0.000225	5.13e-08	0.000292
SNP10118	SNP4423	0.00421	0.000329	0.00436
SNP10118	SNP4664	3.21e-05	4.39e-10	4.13e-05
SNP10118	SNP4940	0.0093	0.000533	0.00924
SNP10118	SNP5053	0.105	0.000745	0.104
SNP10118	SNP5210	0.0101	2.75e-06	0.0153
SNP10118	SNP5211	0.0101	2.75e-06	0.0153
SNP10118	SNP5230	0.0277	0.000211	0.0247
SNP10118	SNP5585	0.00132	2.29e-07	0.00148
SNP10118	SNP5753	0.022	3.31e-05	0.0212
SNP10118	SNP5811	0.000761	1.98e-07	0.000802
SNP10118	SNP5812	0.000761	1.98e-07	0.000802
SNP10118	SNP5883	0.00366	8.64e-07	0.00447
SNP10118	SNP600	0.000363	2.48e-08	0.00041
SNP10118	SNP601	0.000487	6.76e-08	0.000577
SNP10118	SNP6019	0.000452	7.63e-08	0.000527
SNP10118	SNP6333	0.0212	0.000663	0.0267
SNP10118	SNP6361	0.0255	0.000304	0.026
SNP10118	SNP6485	0.118	0.000289	0.111
SNP10118	SNP6904	0.0065	3.71e-05	0.00724
SNP10118	SNP7123	0.000839	1.54e-05	0.000783
SNP10118	SNP7163	0.000332	1.14e-08	0.000412
SNP10118	SNP7187	0.0537	8.16e-05	0.0678
SNP10118	SNP7243	0.00115	1.45e-07	0.00142
SNP10118	SNP9071	0.00165	1.54e-07	0.00203
SNP10118	SNP9100	0.00439	7.54e-05	0.00441
SNP10118	SNP9227	0.00432	7.85e-07	0.00525
SNP10118	SNP9488	0.105	0.000745	0.104
SNP10118	SNP9498	0.0609	0.000788	0.0591
SNP10118	SNP9576	0.0115	2.95e-05	0.0138
SNP10118	SNP9577	0.0115	2.95e-05	0.0138
SNP10118	SNP9639	0.0315	7.49e-05	0.0339
SNP10118	SNP9640	0.0315	7.49e-05	0.0339
SNP10118	SNP9643	0.00137	1.41e-06	0.00226
SNP10118	SNP9783	0.04	0.00093	0.0482
SNP10118	SNP9882	3.28e-05	4.94e-09	4.84e-05
SNP10125	SNP10360	0.045	0.000853	0.0502
SNP10125	SNP11522	0.0134	0.000553	0.0138
SNP10125	SNP12556	0.00844	0.000324	0.00814
SNP10125	SNP12983	0.045	0.000853	0.0502
SNP10125	SNP13392	0.045	0.000853	0.0502
SNP10125	SNP14680	0.0152	0.000467	0.0157
SNP10125	SNP16492	0.00844	0.000324	0.00814
SNP10125	SNP16498	0.00844	0.000324	0.00814
SNP10125	SNP16609	0.0457	0.000694	0.0527
SNP10125	SNP16686	0.0898	0.000915	0.0997
SNP10125	SNP9639	0.0898	0.000915	0.0997
SNP10125	SNP9640	0.0898	0.000915	0.0997
SNP10127	SNP10360	0.182	0.000167	0.219
SNP10127	SNP10379	0.0212	2.99e-06	0.0298
SNP10127	SNP10644	0.0068	3.4e-05	0.00765
SNP10127	SNP10646	0.523	0.00033	0.622
SNP10127	SNP10702	0.0256	0.000158	0.0283
SNP10127	SNP10784	0.00627	5.14e-05	0.00647
SNP10127	SNP11180	0.023	3.61e-05	0.027
SNP10127	SNP11181	0.023	3.61e-05	0.027
SNP10127	SNP11272	0.281	0.000438	0.359
SNP10127	SNP11341	0.00745	0.000269	0.00927
SNP10127	SNP11352	0.344	0.000777	0.411
SNP10127	SNP11353	0.344	0.000777	0.411
SNP10127	SNP11463	0.00163	1.78e-08	0.00255
SNP10127	SNP11643	0.189	0.0009	0.224
SNP10127	SNP12145	0.0677	0.00048	0.0689
SNP10127	SNP12159	0.243	3.3e-05	0.319
SNP10127	SNP12364	0.023	3.61e-05	0.027
SNP10127	SNP12827	0.0306	0.000905	0.0334
SNP10127	SNP12930	0.023	3.61e-05	0.027
SNP10127	SNP12937	0.00699	8.62e-05	0.00716
SNP10127	SNP12983	0.182	0.000167	0.219
SNP10127	SNP13392	0.182	0.000167	0.219
SNP10127	SNP13402	0.0174	0.000354	0.0204
SNP10127	SNP13767	0.344	0.000777	0.411
SNP10127	SNP13842	0.367	0.000852	0.399
SNP10127	SNP13853	0.00821	3.87e-05	0.00894
SNP10127	SNP13924	0.367	0.000852	0.399
SNP10127	SNP13926	0.367	0.000852	0.399
SNP10127	SNP14067	0.311	0.000991	0.327
SNP10127	SNP14137	0.268	0.000218	0.255
SNP10127	SNP1556	0.0263	0.000422	0.0198
SNP10127	SNP15626	0.055	0.00074	0.0561
SNP10127	SNP15861	0.254	0.000963	0.295
SNP10127	SNP1601	0.344	0.000777	0.411
SNP10127	SNP16013	0.344	0.000777	0.411
SNP10127	SNP16071	0.0316	0.000927	0.0488
SNP10127	SNP16125	0.344	0.000777	0.411
SNP10127	SNP16473	0.00681	0.000146	0.00829
SNP10127	SNP16609	0.0404	8.47e-06	0.0536
SNP10127	SNP16686	0.0817	5.05e-05	0.109
SNP10127	SNP16783	0.0263	0.000422	0.0198
SNP10127	SNP17094	0.0132	0.000221	0.0144
SNP10127	SNP1728	0.00939	0.000315	0.00998
SNP10127	SNP2004	0.0285	0.000932	0.03
SNP10127	SNP2428	0.0307	0.000687	0.025
SNP10127	SNP2483	0.169	0.000699	0.193
SNP10127	SNP3408	0.344	0.000777	0.411
SNP10127	SNP3856	0.00684	9.5e-05	0.00601
SNP10127	SNP3905	0.0207	0.000195	0.0221
SNP10127	SNP4344	0.0263	0.000422	0.0198
SNP10127	SNP4412	0.00706	0.000947	0.00834
SNP10127	SNP4664	0.00163	1.78e-08	0.00255
SNP10127	SNP4984	0.344	0.000777	0.411
SNP10127	SNP5230	0.0331	9.07e-05	0.0369
SNP10127	SNP5308	0.344	0.000777	0.411
SNP10127	SNP5585	0.0548	4.27e-05	0.0632
SNP10127	SNP5644	0.0328	0.000497	0.0343
SNP10127	SNP5811	0.243	3.3e-05	0.319
SNP10127	SNP5812	0.243	3.3e-05	0.319
SNP10127	SNP5857	0.00244	0.000261	0.00213
SNP10127	SNP600	0.0689	2.94e-05	0.0839
SNP10127	SNP6019	0.0608	2.51e-05	0.0731
SNP10127	SNP6163	0.023	3.61e-05	0.027
SNP10127	SNP6831	0.0523	4.7e-05	0.0623
SNP10127	SNP7110	0.023	3.61e-05	0.027
SNP10127	SNP7163	0.108	0.000144	0.13
SNP10127	SNP7208	0.367	0.000852	0.399
SNP10127	SNP7243	0.2	0.000282	0.212
SNP10127	SNP7374	0.0328	0.000497	0.0343
SNP10127	SNP7748	0.367	0.000852	0.399
SNP10127	SNP7974	0.023	3.61e-05	0.027
SNP10127	SNP7979	0.0156	0.000474	0.0148
SNP10127	SNP843	0.344	0.000777	0.411
SNP10127	SNP8470	0.055	0.00074	0.0561
SNP10127	SNP8978	0.036	0.000468	0.0382
SNP10127	SNP9030	0.023	3.61e-05	0.027
SNP10127	SNP9071	0.00752	2.41e-07	0.00872
SNP10127	SNP9100	0.00745	0.000269	0.00927
SNP10127	SNP9639	0.0817	5.05e-05	0.109
SNP10127	SNP9640	0.0817	5.05e-05	0.109
SNP10127	SNP9882	0.0428	5.44e-05	0.0531
SNP10138	SNP10379	5.46e-05	5.26e-05	5.1e-05
SNP10138	SNP10470	0.0029	0.000259	0.00303
SNP10138	SNP11463	3.03e-05	8.58e-05	2.86e-05
SNP10138	SNP11686	0.0104	0.000684	0.0127
SNP10138	SNP12190	0.00725	0.000647	0.00695
SNP10138	SNP13806	0.0202	0.000902	0.0208
SNP10138	SNP14098	0.00165	0.000353	0.00168
SNP10138	SNP14482	0.012	0.000464	0.0123
SNP10138	SNP14654	0.0215	0.000826	0.0197
SNP10138	SNP14655	0.0215	0.000826	0.0197
SNP10138	SNP16858	0.00561	0.000418	0.00563
SNP10138	SNP16863	0.00124	0.000105	0.00148
SNP10138	SNP17163	0.0104	0.000684	0.0127
SNP10138	SNP3774	0.00165	0.000353	0.00168
SNP10138	SNP3944	0.012	0.000464	0.0123
SNP10138	SNP4081	0.00484	0.000523	0.00612
SNP10138	SNP4562	0.0202	0.000902	0.0208
SNP10138	SNP4664	3.03e-05	8.58e-05	2.86e-05
SNP10138	SNP5559	0.0104	0.000684	0.0127
SNP10138	SNP6183	0.00228	0.000775	0.00179
SNP10138	SNP6398	0.00228	0.000775	0.00179
SNP10138	SNP6574	0.012	0.000464	0.0123
SNP10138	SNP696	0.0123	0.000626	0.014
SNP10138	SNP7070	0.00151	0.000694	0.00191
SNP10138	SNP7411	0.00241	6.86e-05	0.00281
SNP10138	SNP769	0.00173	0.000194	0.0018
SNP10138	SNP8096	0.0156	0.000596	0.0165
SNP10138	SNP8184	0.0219	0.00088	0.022
SNP10143	SNP10263	0.0359	0.000945	0.0362
SNP10143	SNP10365	0.0941	0.000394	0.102
SNP10143	SNP10379	0.000165	9.57e-08	0.00017
SNP10143	SNP10646	0.0543	9.77e-06	0.0654
SNP10143	SNP10687	0.0107	0.000387	0.0141
SNP10143	SNP11272	0.0207	2.71e-05	0.0274
SNP10143	SNP11463	0.000168	1.78e-08	0.000253
SNP10143	SNP11480	0.179	0.000492	0.197
SNP10143	SNP11522	0.0124	3.66e-05	0.0142
SNP10143	SNP11643	0.157	0.000729	0.163
SNP10143	SNP12145	0.0976	0.00087	0.102
SNP10143	SNP12159	0.034	2.2e-06	0.0405
SNP10143	SNP1255	0.0622	0.000253	0.0665
SNP10143	SNP12556	0.0228	8.02e-05	0.0253
SNP10143	SNP12570	0.029	4.83e-05	0.0336
SNP10143	SNP12619	0.0169	0.00016	0.0209
SNP10143	SNP12752	0.137	0.000683	0.145
SNP10143	SNP12823	0.0802	0.000362	0.0813
SNP10143	SNP12852	0.0749	0.000418	0.0899
SNP10143	SNP13031	0.00765	0.00072	0.00863
SNP10143	SNP13842	0.0926	0.000258	0.111
SNP10143	SNP13924	0.0926	0.000258	0.111
SNP10143	SNP13926	0.0926	0.000258	0.111
SNP10143	SNP14066	0.0175	7.87e-05	0.0294
SNP10143	SNP14067	0.0268	3.7e-05	0.0402
SNP10143	SNP14089	0.0406	2.77e-05	0.0508
SNP10143	SNP14137	0.00848	1.66e-05	0.0176
SNP10143	SNP14380	0.0288	0.000344	0.0356
SNP10143	SNP14514	0.1	0.000846	0.105
SNP10143	SNP1483	0.0622	0.000253	0.0665
SNP10143	SNP14922	0.094	0.000128	0.102
SNP10143	SNP15076	0.0113	0.00038	0.0142
SNP10143	SNP15103	0.013	0.000618	0.0125
SNP10143	SNP15163	0.0814	0.000121	0.099
SNP10143	SNP15825	0.034	3.49e-05	0.0316
SNP10143	SNP15861	0.0152	1.52e-05	0.0163
SNP10143	SNP15925	0.0129	5.52e-05	0.0139
SNP10143	SNP16071	0.052	0.000538	0.0524
SNP10143	SNP16072	0.0125	1.11e-05	0.0147
SNP10143	SNP16276	0.0637	0.000899	0.0676
SNP10143	SNP16325	0.094	5.36e-05	0.113
SNP10143	SNP16358	0.0838	4.99e-05	0.0987
SNP10143	SNP16492	0.0228	8.02e-05	0.0253
SNP10143	SNP16498	0.0228	8.02e-05	0.0253
SNP10143	SNP16609	0.0177	3.37e-06	0.0184
SNP10143	SNP16686	0.0544	2.58e-05	0.06
SNP10143	SNP16698	0.146	0.000166	0.15
SNP10143	SNP179	0.0175	7.87e-05	0.0294
SNP10143	SNP195	0.0225	4.54e-05	0.026
SNP10143	SNP2116	0.0354	0.000218	0.0337
SNP10143	SNP2141	0.0876	0.000257	0.093
SNP10143	SNP2311	0.0188	5.24e-06	0.0245
SNP10143	SNP2604	0.0566	0.000503	0.0755
SNP10143	SNP2702	0.0183	1.05e-05	0.02
SNP10143	SNP2707	0.0222	0.000755	0.0234
SNP10143	SNP2909	0.0514	0.000266	0.0633
SNP10143	SNP2953	0.000908	1.42e-05	0.00108
SNP10143	SNP2983	0.000797	1.48e-05	0.000806
SNP10143	SNP3002	0.0132	0.000738	0.0148
SNP10143	SNP3139	0.0492	0.000175	0.0605
SNP10143	SNP336	0.034	3.49e-05	0.0316
SNP10143	SNP3803	0.00136	2.12e-05	0.00148
SNP10143	SNP4070	0.039	1.66e-05	0.0487
SNP10143	SNP4073	0.0386	0.000505	0.0429
SNP10143	SNP4328	0.0348	1.39e-05	0.0439
SNP10143	SNP453	0.0107	0.000387	0.0141
SNP10143	SNP4588	0.0277	9.01e-05	0.0307
SNP10143	SNP4664	0.000168	1.78e-08	0.000253
SNP10143	SNP4930	0.014	0.000132	0.0146
SNP10143	SNP5053	0.179	0.000492	0.197
SNP10143	SNP5210	0.0163	1.3e-05	0.0202
SNP10143	SNP5211	0.0163	1.3e-05	0.0202
SNP10143	SNP5212	0.0539	0.0002	0.0579
SNP10143	SNP5242	0.0633	0.000106	0.0588
SNP10143	SNP5380	0.0192	0.000582	0.0211
SNP10143	SNP5585	0.00119	3.7e-07	0.00175
SNP10143	SNP5631	0.0208	0.000229	0.0239
SNP10143	SNP5811	0.034	2.2e-06	0.0405
SNP10143	SNP5812	0.034	2.2e-06	0.0405
SNP10143	SNP5857	0.0246	0.000637	0.0294
SNP10143	SNP5883	0.0104	1.45e-05	0.0105
SNP10143	SNP5897	0.034	3.49e-05	0.0316
SNP10143	SNP600	0.00283	8.81e-07	0.00355
SNP10143	SNP601	0.0111	5.34e-06	0.0133
SNP10143	SNP6019	0.00729	1.03e-05	0.00887
SNP10143	SNP6404	0.0168	1.15e-05	0.019
SNP10143	SNP6817	0.00598	1.97e-05	0.00729
SNP10143	SNP6831	0.0367	2.09e-05	0.0371
SNP10143	SNP7163	0.00294	2.39e-07	0.00377
SNP10143	SNP7187	0.0274	0.000101	0.0321
SNP10143	SNP7204	0.034	3.49e-05	0.0316
SNP10143	SNP7208	0.0926	0.000258	0.111
SNP10143	SNP7243	0.00969	5.32e-06	0.0128
SNP10143	SNP7467	0.0304	0.000176	0.0309
SNP10143	SNP7564	0.0175	0.000208	0.0208
SNP10143	SNP7597	0.034	3.49e-05	0.0316
SNP10143	SNP7617	0.104	0.000658	0.106
SNP10143	SNP7748	0.0926	0.000258	0.111
SNP10143	SNP7903	0.0518	0.000238	0.0556
SNP10143	SNP8705	0.034	3.49e-05	0.0316
SNP10143	SNP9071	7.48e-05	1.09e-08	0.000122
SNP10143	SNP9227	0.0306	1.32e-05	0.0389
SNP10143	SNP9488	0.179	0.000492	0.197
SNP10143	SNP9498	0.0225	4.54e-05	0.026
SNP10143	SNP9576	0.094	0.000128	0.102
SNP10143	SNP9577	0.094	0.000128	0.102
SNP10143	SNP9639	0.0544	2.58e-05	0.06
SNP10143	SNP9640	0.0544	2.58e-05	0.06
SNP10143	SNP9643	0.00148	5.37e-06	0.00184
SNP10143	SNP9882	0.000293	1.66e-07	0.000392
SNP10144	SNP10263	0.0359	0.000945	0.0362
SNP10144	SNP10365	0.0941	0.000394	0.102
SNP10144	SNP10379	0.000165	9.57e-08	0.00017
SNP10144	SNP10646	0.0543	9.77e-06	0.0654
SNP10144	SNP10687	0.0107	0.000387	0.0141
SNP10144	SNP11272	0.0207	2.71e-05	0.0274
SNP10144	SNP11463	0.000168	1.78e-08	0.000253
SNP10144	SNP11480	0.179	0.000492	0.197
SNP10144	SNP11522	0.0124	3.66e-05	0.0142
SNP10144	SNP11643	0.157	0.000729	0.163
SNP10144	SNP12145	0.0976	0.00087	0.102
SNP10144	SNP12159	0.034	2.2e-06	0.0405
SNP10144	SNP1255	0.0622	0.000253	0.0665
SNP10144	SNP12556	0.0228	8.02e-05	0.0253
SNP10144	SNP12570	0.029	4.83e-05	0.0336
SNP10144	SNP12619	0.0169	0.00016	0.0209
SNP10144	SNP12752	0.137	0.000683	0.145
SNP10144	SNP12823	0.0802	0.000362	0.0813
SNP10144	SNP12852	0.0749	0.000418	0.0899
SNP10144	SNP13031	0.00765	0.00072	0.00863
SNP10144	SNP13842	0.0926	0.000258	0.111
SNP10144	SNP13924	0.0926	0.000258	0.111
SNP10144	SNP13926	0.0926	0.000258	0.111
SNP10144	SNP14066	0.0175	7.87e-05	0.0294
SNP10144	SNP14067	0.0268	3.7e-05	0.0402
SNP10144	SNP14089	0.0406	2.77e-05	0.0508
SNP10144	SNP14137	0.00848	1.66e-05	0.0176
SNP10144	SNP14380	0.0288	0.000344	0.0356
SNP10144	SNP14514	0.1	0.000846	0.105
SNP10144	SNP1483	0.0622	0.000253	0.0665
SNP10144	SNP14922	0.094	0.000128	0.102
SNP10144	SNP15076	0.0113	0.00038	0.0142
SNP10144	SNP15103	0.013	0.000618	0.0125
SNP10144	SNP15163	0.0814	0.000121	0.099
SNP10144	SNP15825	0.034	3.49e-05	0.0316
SNP10144	SNP15861	0.0152	1.52e-05	0.0163
SNP10144	SNP15925	0.0129	5.52e-05	0.0139
SNP10144	SNP16071	0.052	0.000538	0.0524
SNP10144	SNP16072	0.0125	1.11e-05	0.0147
SNP10144	SNP16276	0.0637	0.000899	0.0676
SNP10144	SNP16325	0.094	5.36e-05	0.113
SNP10144	SNP16358	0.0838	4.99e-05	0.0987
SNP10144	SNP16492	0.0228	8.02e-05	0.0253
SNP10144	SNP16498	0.0228	8.02e-05	0.0253
SNP10144	SNP16609	0.0177	3.37e-06	0.0184
SNP10144	SNP16686	0.0544	2.58e-05	0.06
SNP10144	SNP16698	0.146	0.000166	0.15
SNP10144	SNP179	0.0175	7.87e-05	0.0294
SNP10144	SNP195	0.0225	4.54e-05	0.026
SNP10144	SNP2116	0.0354	0.000218	0.0337
SNP10144	SNP2141	0.0876	0.000257	0.093
SNP10144	SNP2311	0.0188	5.24e-06	0.0245
SNP10144	SNP2604	0.0566	0.000503	0.0755
SNP10144	SNP2702	0.0183	1.05e-05	0.02
SNP10144	SNP2707	0.0222	0.000755	0.0234
SNP10144	SNP2909	0.0514	0.000266	0.0633
SNP10144	SNP2953	0.000908	1.42e-05	0.00108
SNP10144	SNP2983	0.000797	1.48e-05	0.000806
SNP10144	SNP3002	0.0132	0.000738	0.0148
SNP10144	SNP3139	0.0492	0.000175	0.0605
SNP10144	SNP336	0.034	3.49e-05	0.0316
SNP10144	SNP3803	0.00136	2.12e-05	0.00148
SNP10144	SNP4070	0.039	1.66e-05	0.0487
SNP10144	SNP4073	0.0386	0.000505	0.0429
SNP10144	SNP4328	0.0348	1.39e-05	0.0439
SNP10144	SNP453	0.0107	0.000387	0.0141
SNP10144	SNP4588	0.0277	9.01e-05	0.0307
SNP10144	SNP4664	0.000168	1.78e-08	0.000253
SNP10144	SNP4930	0.014	0.000132	0.0146
SNP10144	SNP5053	0.179	0.000492	0.197
SNP10144	SNP5210	0.0163	1.3e-05	0.0202
SNP10144	SNP5211	0.0163	1.3e-05	0.0202
SNP10144	SNP5212	0.0539	0.0002	0.0579
SNP10144	SNP5242	0.0633	0.000106	0.0588
SNP10144	SNP5380	0.0192	0.000582	0.0211
SNP10144	SNP5585	0.00119	3.7e-07	0.00175
SNP10144	SNP5631	0.0208	0.000229	0.0239
SNP10144	SNP5811	0.034	2.2e-06	0.0405
SNP10144	SNP5812	0.034	2.2e-06	0.0405
SNP10144	SNP5857	0.0246	0.000637	0.0294
SNP10144	SNP5883	0.0104	1.45e-05	0.0105
SNP10144	SNP5897	0.034	3.49e-05	0.0316
SNP10144	SNP600	0.00283	8.81e-07	0.00355
SNP10144	SNP601	0.0111	5.34e-06	0.0133
SNP10144	SNP6019	0.00729	1.03e-05	0.00887
SNP10144	SNP6404	0.0168	1.15e-05	0.019
SNP10144	SNP6817	0.00598	1.97e-05	0.00729
SNP10144	SNP6831	0.0367	2.09e-05	0.0371
SNP10144	SNP7163	0.00294	2.39e-07	0.00377
SNP10144	SNP7187	0.0274	0.000101	0.0321
SNP10144	SNP7204	0.034	3.49e-05	0.0316
SNP10144	SNP7208	0.0926	0.000258	0.111
SNP10144	SNP7243	0.00969	5.32e-06	0.0128
SNP10144	SNP7467	0.0304	0.000176	0.0309
SNP10144	SNP7564	0.0175	0.000208	0.0208
SNP10144	SNP7597	0.034	3.49e-05	0.0316
SNP10144	SNP7617	0.104	0.000658	0.106
SNP10144	SNP7748	0.0926	0.000258	0.111
SNP10144	SNP7903	0.0518	0.000238	0.0556
SNP10144	SNP8705	0.034	3.49e-05	0.0316
SNP10144	SNP9071	7.48e-05	1.09e-08	0.000122
SNP10144	SNP9227	0.0306	1.32e-05	0.0389
SNP10144	SNP9488	0.179	0.000492	0.197
SNP10144	SNP9498	0.0225	4.54e-05	0.026
SNP10144	SNP9576	0.094	0.000128	0.102
SNP10144	SNP9577	0.094	0.000128	0.102
SNP10144	SNP9639	0.0544	2.58e-05	0.06
SNP10144	SNP9640	0.0544	2.58e-05	0.06
SNP10144	SNP9643	0.00148	5.37e-06	0.00184
SNP10144	SNP9882	0.000293	1.66e-07	0.000392
SNP10151	SNP10657	0.0318	0.000871	0.0311
SNP10151	SNP11180	0.0533	0.000496	0.0509
SNP10151	SNP11181	0.0533	0.000496	0.0509
SNP10151	SNP11352	0.151	0.00097	0.162
SNP10151	SNP11353	0.151	0.00097	0.162
SNP10151	SNP12364	0.0533	0.000496	0.0509
SNP10151	SNP12496	0.0107	0.000856	0.0116
SNP10151	SNP12930	0.0533	0.000496	0.0509
SNP10151	SNP13331	0.0107	0.000856	0.0116
SNP10151	SNP13767	0.151	0.00097	0.162
SNP10151	SNP1601	0.151	0.00097	0.162
SNP10151	SNP16013	0.151	0.00097	0.162
SNP10151	SNP16125	0.151	0.00097	0.162
SNP10151	SNP16609	0.018	9.24e-05	0.0214
SNP10151	SNP16686	0.0853	0.000374	0.0913
SNP10151	SNP3408	0.151	0.00097	0.162
SNP10151	SNP4984	0.151	0.00097	0.162
SNP10151	SNP5308	0.151	0.00097	0.162
SNP10151	SNP6163	0.0533	0.000496	0.0509
SNP10151	SNP6831	0.0343	0.000364	0.0395
SNP10151	SNP7110	0.0533	0.000496	0.0509
SNP10151	SNP7974	0.0533	0.000496	0.0509
SNP10151	SNP843	0.151	0.00097	0.162
SNP10151	SNP9030	0.0533	0.000496	0.0509
SNP10151	SNP9639	0.0853	0.000374	0.0913
SNP10151	SNP9640	0.0853	0.000374	0.0913
SNP10151	SNP9877	0.154	0.000985	0.181
SNP10155	SNP10216	0.000874	2.42e-06	0.00109
SNP10155	SNP10360	0.101	5.51e-05	0.104
SNP10155	SNP10379	0.000705	6.01e-08	0.000784
SNP10155	SNP10644	0.0191	0.000151	0.0242
SNP10155	SNP10646	0.103	1.05e-05	0.118
SNP10155	SNP10647	0.615	0.000891	0.641
SNP10155	SNP10702	0.0438	0.000409	0.0536
SNP10155	SNP10955	0.00818	0.000706	0.00958
SNP10155	SNP11180	0.0438	0.000117	0.0485
SNP10155	SNP11181	0.0438	0.000117	0.0485
SNP10155	SNP11272	0.151	0.00014	0.185
SNP10155	SNP11341	0.000138	1.25e-08	0.000137
SNP10155	SNP11352	0.139	0.000116	0.135
SNP10155	SNP11353	0.139	0.000116	0.135
SNP10155	SNP11379	0.0579	0.000253	0.0658
SNP10155	SNP11463	2.24e-05	2.26e-10	2.47e-05
SNP10155	SNP11522	0.0336	0.000191	0.0381
SNP10155	SNP11627	0.0231	0.000526	0.0222
SNP10155	SNP12159	0.0241	4.31e-07	0.0266
SNP10155	SNP12364	0.0438	0.000117	0.0485
SNP10155	SNP12556	0.0183	7.99e-05	0.0211
SNP10155	SNP12930	0.0438	0.000117	0.0485
SNP10155	SNP12983	0.101	5.51e-05	0.104
SNP10155	SNP13217	0.125	0.000871	0.119
SNP10155	SNP13392	0.101	5.51e-05	0.104
SNP10155	SNP13402	0.00056	1.12e-07	0.000596
SNP10155	SNP13767	0.139	0.000116	0.135
SNP10155	SNP13853	0.0233	0.000181	0.0289
SNP10155	SNP14067	0.256	0.000856	0.272
SNP10155	SNP14089	0.0126	4.16e-05	0.0121
SNP10155	SNP14281	0.0736	0.000103	0.0747
SNP10155	SNP1441	0.423	0.000758	0.429
SNP10155	SNP14680	0.0789	0.000717	0.0848
SNP10155	SNP15103	0.00438	1.59e-05	0.00197
SNP10155	SNP15278	0.0562	0.000531	0.0651
SNP10155	SNP15279	0.0562	0.000531	0.0651
SNP10155	SNP15280	0.0562	0.000531	0.0651
SNP10155	SNP15626	0.103	0.000227	0.11
SNP10155	SNP15693	0.0106	0.000508	0.0102
SNP10155	SNP15861	0.198	0.00087	0.23
SNP10155	SNP1601	0.139	0.000116	0.135
SNP10155	SNP16013	0.139	0.000116	0.135
SNP10155	SNP16072	0.466	0.000412	0.486
SNP10155	SNP16099	0.182	0.000655	0.181
SNP10155	SNP16125	0.139	0.000116	0.135
SNP10155	SNP16128	0.331	0.000123	0.332
SNP10155	SNP16492	0.0183	7.99e-05	0.0211
SNP10155	SNP16498	0.0183	7.99e-05	0.0211
SNP10155	SNP16609	0.00645	6.06e-07	0.00768
SNP10155	SNP16686	0.00964	1.41e-06	0.00967
SNP10155	SNP1728	0.00583	0.000262	0.00663
SNP10155	SNP1804	0.17	0.000939	0.178
SNP10155	SNP1921	0.0762	0.00042	0.0844
SNP10155	SNP195	0.0584	0.000348	0.065
SNP10155	SNP2116	0.121	0.000487	0.119
SNP10155	SNP2239	0.0308	0.000146	0.034
SNP10155	SNP2311	0.00495	5.44e-06	0.00488
SNP10155	SNP2483	0.066	0.000154	0.0705
SNP10155	SNP2512	0.024	0.000957	0.0264
SNP10155	SNP2564	0.000807	1.58e-06	0.000985
SNP10155	SNP2702	0.0091	1.85e-05	0.00952
SNP10155	SNP2707	0.0222	0.000141	0.0219
SNP10155	SNP330	0.0579	0.000253	0.0658
SNP10155	SNP3408	0.139	0.000116	0.135
SNP10155	SNP3730	0.0937	0.000581	0.106
SNP10155	SNP3803	0.076	0.000374	0.0781
SNP10155	SNP3905	0.0303	3.17e-05	0.0338
SNP10155	SNP3958	0.000379	2.99e-06	0.000469
SNP10155	SNP4009	0.00167	5.95e-07	0.00183
SNP10155	SNP4057	0.011	0.000743	0.0113
SNP10155	SNP4070	0.0108	2.35e-05	0.0101
SNP10155	SNP4073	0.0397	4.72e-05	0.0429
SNP10155	SNP4328	0.00959	2.18e-05	0.00925
SNP10155	SNP4412	0.00152	0.000187	0.00169
SNP10155	SNP4423	0.0551	0.000405	0.054
SNP10155	SNP46	0.0192	0.00013	0.0195
SNP10155	SNP4664	2.24e-05	2.26e-10	2.47e-05
SNP10155	SNP4930	0.00871	0.000561	0.015
SNP10155	SNP4984	0.139	0.000116	0.135
SNP10155	SNP5210	0.0594	7.91e-05	0.0622
SNP10155	SNP5211	0.0594	7.91e-05	0.0622
SNP10155	SNP5230	0.103	0.000189	0.107
SNP10155	SNP526	0.07	0.000635	0.0666
SNP10155	SNP5308	0.139	0.000116	0.135
SNP10155	SNP5395	0.0151	0.000274	0.0167
SNP10155	SNP5585	0.000255	1.37e-08	0.000275
SNP10155	SNP5631	0.0728	9.42e-05	0.0795
SNP10155	SNP5644	0.0733	0.00018	0.0793
SNP10155	SNP5704	0.034	0.000833	0.03
SNP10155	SNP5753	0.331	0.000123	0.332
SNP10155	SNP5811	0.0241	4.31e-07	0.0266
SNP10155	SNP5812	0.0241	4.31e-07	0.0266
SNP10155	SNP5857	0.000631	0.000277	0.00151
SNP10155	SNP5883	0.174	0.000778	0.182
SNP10155	SNP5900	0.0579	0.000253	0.0658
SNP10155	SNP600	0.0039	9.73e-08	0.00415
SNP10155	SNP601	0.0217	4.12e-06	0.0216
SNP10155	SNP6019	0.00322	8.23e-08	0.00325
SNP10155	SNP6163	0.0438	0.000117	0.0485
SNP10155	SNP6485	0.292	0.000289	0.319
SNP10155	SNP6604	0.00183	0.000845	0.00183
SNP10155	SNP6831	0.0086	4.61e-06	0.0109
SNP10155	SNP7110	0.0438	0.000117	0.0485
SNP10155	SNP7123	0.0469	4.66e-05	0.0442
SNP10155	SNP7163	0.00538	1.59e-06	0.00557
SNP10155	SNP7187	0.021	4.73e-05	0.0222
SNP10155	SNP7243	0.0643	2.31e-05	0.0657
SNP10155	SNP7374	0.0733	0.00018	0.0793
SNP10155	SNP7536	0.034	0.000833	0.03
SNP10155	SNP7955	0.00742	6.54e-05	0.00881
SNP10155	SNP7974	0.0438	0.000117	0.0485
SNP10155	SNP7991	0.0624	0.000405	0.0685
SNP10155	SNP843	0.139	0.000116	0.135
SNP10155	SNP8470	0.103	0.000227	0.11
SNP10155	SNP8978	0.00592	5.57e-05	0.00645
SNP10155	SNP9030	0.0438	0.000117	0.0485
SNP10155	SNP904	0.0308	0.000146	0.034
SNP10155	SNP9071	0.00034	2.23e-09	0.000371
SNP10155	SNP9100	0.000138	1.25e-08	0.000137
SNP10155	SNP9227	0.00492	5.29e-06	0.00476
SNP10155	SNP9289	0.0151	0.000274	0.0167
SNP10155	SNP9498	0.0584	0.000348	0.065
SNP10155	SNP9522	0.0937	0.000581	0.106
SNP10155	SNP9639	0.00964	1.41e-06	0.00967
SNP10155	SNP9640	0.00964	1.41e-06	0.00967
SNP10155	SNP9643	0.00611	1.29e-06	0.00624
SNP10155	SNP9877	0.34	0.000413	0.304
SNP10155	SNP9882	0.00172	1.74e-07	0.00162
SNP1016	SNP10254	0.00066	5.71e-06	0.000527
SNP1016	SNP11153	0.000539	3.12e-06	0.000504
SNP1016	SNP11504	0.00175	1.74e-05	0.00117
SNP1016	SNP12176	0.00066	5.71e-06	0.000527
SNP1016	SNP12333	0.000448	8.2e-05	0.00046
SNP1016	SNP13323	0.000539	3.12e-06	0.000504
SNP1016	SNP13570	0.000539	3.12e-06	0.000504
SNP1016	SNP13689	0.00658	4.59e-05	0.0091
SNP1016	SNP13944	0.0106	6.3e-05	0.00864
SNP1016	SNP14028	0.0106	6.3e-05	0.00864
SNP1016	SNP14304	0.00066	5.71e-06	0.000527
SNP1016	SNP14695	0.00175	1.74e-05	0.00117
SNP1016	SNP14923	0.0109	0.00039	0.0106
SNP1016	SNP1573	0.0109	0.00039	0.0106
SNP1016	SNP204	0.000539	3.12e-06	0.000504
SNP1016	SNP2185	0.000539	3.12e-06	0.000504
SNP1016	SNP2205	0.000539	3.12e-06	0.000504
SNP1016	SNP2295	0.00658	4.59e-05	0.0091
SNP1016	SNP2571	0.0131	0.000929	0.0145
SNP1016	SNP2745	0.0109	0.00039	0.0106
SNP1016	SNP2765	0.0109	0.00039	0.0106
SNP1016	SNP3829	0.000676	5.51e-06	0.000751
SNP1016	SNP3897	0.000539	3.12e-06	0.000504
SNP1016	SNP4009	0.0141	0.000645	0.0148
SNP1016	SNP5311	0.0106	8.64e-05	0.00784
SNP1016	SNP6042	0.00162	1.11e-05	0.00138
SNP1016	SNP658	0.000539	3.12e-06	0.000504
SNP1016	SNP7123	0.0155	0.000361	0.015
SNP1016	SNP8433	0.0223	0.000723	0.022
SNP10172	SNP10664	0.0247	0.00069	0.0252
SNP10172	SNP11463	0.0899	0.000287	0.108
SNP10172	SNP1963	0.019	0.000653	0.0212
SNP10172	SNP2544	0.0274	0.000589	0.0236
SNP10172	SNP3906	0.0373	0.000687	0.0292
SNP10172	SNP4223	0.0253	0.000558	0.0221
SNP10172	SNP4476	0.00658	0.000472	0.0076
SNP10172	SNP4664	0.0899	0.000287	0.108
SNP10172	SNP5883	0.11	0.000905	0.121
SNP10172	SNP7163	0.136	0.000836	0.149
SNP10172	SNP7243	0.0229	0.00017	0.0278
SNP10172	SNP8270	0.019	0.000653	0.0212
SNP10172	SNP8467	0.0253	0.000558	0.0221
SNP10172	SNP8877	0.0256	0.000799	0.0279
SNP10172	SNP9071	0.0327	0.000442	0.0326
SNP10176	SNP10829	0.000799	0.000477	0.00127
SNP10176	SNP10839	0.000746	0.000495	0.00133
SNP10176	SNP12422	0.000779	0.000509	0.00137
SNP10176	SNP12423	0.000779	0.000509	0.00137
SNP10176	SNP12569	0.00091	0.000532	0.00138
SNP10176	SNP15252	0.000641	0.000446	0.00116
SNP10176	SNP15697	0.000883	0.000503	0.00134
SNP10176	SNP1593	0.00301	0.000753	0.00317
SNP10176	SNP16408	0.000616	0.000449	0.00118
SNP10176	SNP2605	0.000813	0.000512	0.00138
SNP10176	SNP4743	0.00296	0.000741	0.00314
SNP10176	SNP4751	0.00294	0.000725	0.0032
SNP10176	SNP5	0.000682	0.00047	0.00124
SNP10176	SNP6016	0.000518	0.00041	0.00107
SNP10176	SNP6745	0.000702	0.000469	0.00124
SNP10176	SNP7700	0.000852	0.000551	0.00144
SNP10176	SNP817	0.000799	0.000477	0.00127
SNP10176	SNP9609	0.000502	0.000417	0.0011
SNP10178	SNP11322	0.000424	0.000439	0.000451
SNP10178	SNP12619	0.00376	0.000897	0.00492
SNP10178	SNP13752	0.000764	0.000615	0.000898
SNP10178	SNP13935	8.4e-05	3.77e-05	0.00017
SNP10178	SNP14515	0.000764	0.000615	0.000898
SNP10178	SNP15018	0.0135	0.000764	0.0157
SNP10178	SNP16687	0.000764	0.000615	0.000898
SNP10178	SNP17292	0.0097	0.000269	0.00972
SNP10178	SNP1850	0.000764	0.000615	0.000898
SNP10178	SNP1929	0.0097	0.000269	0.00972
SNP10178	SNP1963	0.000914	0.00545	0.00156
SNP10178	SNP3453	0.00703	0.000928	0.00612
SNP10178	SNP3920	0.00495	0.000843	0.00553
SNP10178	SNP4476	0.00805	0.000748	0.00808
SNP10178	SNP769	0.00732	0.000674	0.00847
SNP10178	SNP7943	0.0135	0.000477	0.0136
SNP10178	SNP8270	0.000914	0.00545	0.00156
SNP10182	SNP10227	0.0145	0.000864	0.0166
SNP10182	SNP10883	0.0103	0.000368	0.0109
SNP10182	SNP11264	0.0116	0.00047	0.0127
SNP10182	SNP12084	0.00854	0.00094	0.0107
SNP10182	SNP1270	0.00103	2.5e-05	0.00131
SNP10182	SNP13341	0.0116	0.00047	0.0127
SNP10182	SNP13752	7.27e-05	3.46e-06	8.48e-05
SNP10182	SNP13866	0.0255	0.000148	0.0217
SNP10182	SNP14017	0.00539	0.000224	0.00641
SNP10182	SNP14018	0.00632	0.000379	0.00687
SNP10182	SNP14515	7.27e-05	3.46e-06	8.48e-05
SNP10182	SNP14921	0.0103	0.000368	0.0109
SNP10182	SNP15318	0.00123	0.000676	0.00146
SNP10182	SNP15461	0.0116	0.00047	0.0127
SNP10182	SNP15581	0.0116	0.00047	0.0127
SNP10182	SNP15582	0.0116	0.00047	0.0127
SNP10182	SNP15696	0.0116	0.00047	0.0127
SNP10182	SNP15820	0.0116	0.00047	0.0127
SNP10182	SNP15821	0.0116	0.00047	0.0127
SNP10182	SNP16128	0.161	0.000672	0.185
SNP10182	SNP16301	0.0116	0.00047	0.0127
SNP10182	SNP16309	0.00854	0.00094	0.0107
SNP10182	SNP16687	7.27e-05	3.46e-06	8.48e-05
SNP10182	SNP16788	0.00267	0.000131	0.00302
SNP10182	SNP16790	0.0116	0.00047	0.0127
SNP10182	SNP17205	0.0116	0.00047	0.0127
SNP10182	SNP1850	7.27e-05	3.46e-06	8.48e-05
SNP10182	SNP240	0.0116	0.00047	0.0127
SNP10182	SNP2512	0.00074	0.00094	0.000592
SNP10182	SNP2544	0.134	0.000685	0.122
SNP10182	SNP2953	0.00117	0.000412	0.00146
SNP10182	SNP3389	0.00905	0.000548	0.0104
SNP10182	SNP4223	0.0526	0.00028	0.0494
SNP10182	SNP5329	0.00632	0.000379	0.00687
SNP10182	SNP5525	0.0116	0.00047	0.0127
SNP10182	SNP5753	0.161	0.000672	0.185
SNP10182	SNP5865	0.0116	0.00047	0.0127
SNP10182	SNP6444	0.0198	0.000844	0.0217
SNP10182	SNP646	0.0116	0.00047	0.0127
SNP10182	SNP6580	0.00137	0.00075	0.00209
SNP10182	SNP6982	0.0115	0.000864	0.0125
SNP10182	SNP7337	0.0116	0.00047	0.0127
SNP10182	SNP7556	0.0116	0.00047	0.0127
SNP10182	SNP8027	0.0116	0.00047	0.0127
SNP10182	SNP8051	0.00503	0.000836	0.00415
SNP10182	SNP8467	0.0526	0.00028	0.0494
SNP10182	SNP849	0.0116	0.00047	0.0127
SNP10182	SNP8644	0.0116	0.00047	0.0127
SNP10182	SNP922	0.00838	0.000392	0.00853
SNP10182	SNP9643	0.0158	0.000391	0.0156
SNP10182	SNP9696	0.0116	0.00047	0.0127
SNP10182	SNP9844	0.00916	0.000488	0.0105
SNP10183	SNP10227	0.0145	0.000864	0.0166
SNP10183	SNP10883	0.0103	0.000368	0.0109
SNP10183	SNP11264	0.0116	0.00047	0.0127
SNP10183	SNP12084	0.00854	0.00094	0.0107
SNP10183	SNP1270	0.00103	2.5e-05	0.00131
SNP10183	SNP13341	0.0116	0.00047	0.0127
SNP10183	SNP13752	7.27e-05	3.46e-06	8.48e-05
SNP10183	SNP13866	0.0255	0.000148	0.0217
SNP10183	SNP14017	0.00539	0.000224	0.00641
SNP10183	SNP14018	0.00632	0.000379	0.00687
SNP10183	SNP14515	7.27e-05	3.46e-06	8.48e-05
SNP10183	SNP14921	0.0103	0.000368	0.0109
SNP10183	SNP15318	0.00123	0.000676	0.00146
SNP10183	SNP15461	0.0116	0.00047	0.0127
SNP10183	SNP15581	0.0116	0.00047	0.0127
SNP10183	SNP15582	0.0116	0.00047	0.0127
SNP10183	SNP15696	0.0116	0.00047	0.0127
SNP10183	SNP15820	0.0116	0.00047	0.0127
SNP10183	SNP15821	0.0116	0.00047	0.0127
SNP10183	SNP16128	0.161	0.000672	0.185
SNP10183	SNP16301	0.0116	0.00047	0.0127
SNP10183	SNP16309	0.00854	0.00094	0.0107
SNP10183	SNP16687	7.27e-05	3.46e-06	8.48e-05
SNP10183	SNP16788	0.00267	0.000131	0.00302
SNP10183	SNP16790	0.0116	0.00047	0.0127
SNP10183	SNP17205	0.0116	0.00047	0.0127
SNP10183	SNP1850	7.27e-05	3.46e-06	8.48e-05
SNP10183	SNP240	0.0116	0.00047	0.0127
[truncated: 95,775 more rows]

## Sheet: 04.Mouse
SNP01	SNP02	REMMA	Q+K	Q+2K
CEL.10.113177617	rs13476079	0.000449	0.000274	0.00045
CEL.10.113177617	rs13476086	0.000226	9.24e-05	0.000185
CEL.10.113177617	rs13476089	0.000226	9.24e-05	0.000185
CEL.10.113177617	rs13476094	2.48e-05	1.29e-05	2.52e-05
CEL.10.113177617	rs13476095	2.45e-05	1.3e-05	2.52e-05
CEL.10.113177617	rs13476100	3.35e-05	4.99e-06	2.54e-05
CEL.10.113177617	rs13481636	0.000477	0.00292	0.000507
CEL.10.113177617	rs13481641	0.000485	0.00282	0.000506
CEL.10.113177617	rs13482558	0.0114	0.000663	0.0113
CEL.10.113177617	rs13482589	0.00357	0.000491	0.00387
CEL.10.113177617	rs13482595	0.00263	0.000387	0.00244
CEL.10.113177617	rs3090765	2.25e-05	1.16e-05	2.27e-05
CEL.10.113177617	rs3654559	0.00583	0.000781	0.00538
CEL.10.113177617	rs3654706	0.000768	0.00319	0.000819
CEL.10.113177617	rs3683495	0.00621	0.000805	0.00566
CEL.10.113177617	rs3686671	0.000226	9.24e-05	0.000185
CEL.10.113177617	rs3687720	2.48e-05	1.29e-05	2.52e-05
CEL.10.113177617	rs3691374	3.35e-05	4.99e-06	2.54e-05
CEL.10.113177617	rs3694822	0.000179	7.43e-05	0.000147
CEL.10.113177617	rs3709829	0.000848	0.0039	0.000923
CEL.10.113177617	rs3716165	2.45e-05	1.3e-05	2.52e-05
CEL.10.113177617	rs3717360	0.000221	9.24e-05	0.000184
CEL.10.113177617	rs3719973	0.00102	0.00049	0.000981
CEL.10.113177617	rs4138760	0.0122	0.00073	0.0121
CEL.10.113177617	rs4152386	0.000357	3.7e-05	0.000306
CEL.10.113177617	rs4152838	0.00278	0.000463	0.00278
CEL.10.113177617	rs4229612	0.000855	0.00396	0.000928
CEL.10.113177617	rs6177803	0.00849	0.000372	0.0109
CEL.10.113177617	rs6189020	2.5e-05	1.18e-05	2.51e-05
CEL.10.113177617	rs6228473	4.97e-05	2.39e-05	4.88e-05
CEL.10.113177617	rs6308228	0.00459	0.000878	0.00355
CEL.10.113177617	rs6400804	0.0024	0.000231	0.00219
CEL.10.113177617	rs6410533	0.00146	0.000892	0.000964
CEL.1.111503693	rs6223000	0.0007	0.000397	0.000626
CEL.1.111503693	rs6316813	0.000782	0.00126	0.000677
CEL.11.118234030	rs13483340	0.00362	0.000574	0.00352
CEL.1.117526378	rs13480797	0.00703	0.000646	0.00655
CEL.1.117526378	rs13481375	0.00109	0.000392	0.000952
CEL.1.117526378	rs3695382	0.00885	0.000988	0.00885
CEL.1.117526378	rs3697980	0.00148	0.000739	0.00155
CEL.1.117526378	rs6185704	0.00188	0.000438	0.0019
CEL.1.117526378	rs6197961	0.00703	0.000646	0.00655
CEL.1.117526378	rs6223000	0.00307	0.00095	0.00246
CEL.1.117526378	rs6390855	0.0025	0.000969	0.00221
CEL.1.117526378	UT.12.24.561109	0.002	0.00083	0.00188
CEL.1.148141836	rs8244195	0.0198	0.000836	0.0158
CEL.11.73459270	rs13476136	0.00507	0.000558	0.00542
CEL.11.73459270	rs4152838	0.0146	0.000864	0.0124
CEL.1.182091301	gnf10.087.008	0.00184	0.000872	0.00188
CEL.1.182091301	rs13480687	0.00137	0.000676	0.0014
CEL.1.182091301	rs13482580	1.72e-05	7.05e-06	1.91e-05
CEL.1.182091301	rs13482589	0.000174	7.24e-05	0.0002
CEL.1.182091301	rs13482870	0.000127	0.000179	0.000125
CEL.1.182091301	rs3090641	0.000707	0.000611	0.000673
CEL.1.182091301	rs3660290	6.56e-05	2.34e-05	7.7e-05
CEL.1.182091301	rs3692040	6.57e-05	2.36e-05	7.72e-05
CEL.1.182091301	rs3702484	0.000418	0.000348	0.000454
CEL.1.182091301	rs6165881	3.38e-05	1.74e-05	3.85e-05
CEL.12.104545022	gnf10.087.008	0.000929	0.000154	0.000882
CEL.12.104545022	rs13480510	0.0011	0.000924	0.00107
CEL.12.104545022	rs13480687	0.00127	0.000231	0.0012
CEL.12.104545022	rs13481618	0.000908	0.000809	0.00102
CEL.12.104545022	rs13482654	0.000428	0.00133	0.000565
CEL.12.104545022	rs13482691	0.000378	5.25e-05	0.000331
CEL.12.104545022	rs13482693	0.000908	0.000205	0.00102
CEL.12.104545022	rs13482719	0.000528	0.000621	0.000538
CEL.12.104545022	rs13483569	0.00303	0.000203	0.00261
CEL.12.104545022	rs13483577	0.00318	0.000943	0.00302
CEL.12.104545022	rs3088752	0.00561	0.000462	0.00531
CEL.12.104545022	rs3660367	0.000122	0.000129	0.000128
CEL.12.104545022	rs3720897	0.000169	3.82e-05	0.000169
CEL.12.104545022	rs3720931	0.00168	0.000506	0.00202
CEL.12.104545022	rs3723790	0.000481	0.000245	0.000518
CEL.12.104545022	rs4219239	0.00513	0.000453	0.00621
CEL.12.104545022	rs4224426	0.000996	0.00118	0.000978
CEL.12.104545022	rs4230930	5.51e-05	5.66e-05	5.83e-05
CEL.12.104545022	rs6185704	0.00121	0.000846	0.00126
CEL.12.104545022	rs6245242	0.00364	0.00041	0.00319
CEL.12.104545022	rs6342493	0.003	0.000225	0.00256
CEL.12.38970880	rs4225575	0.00599	0.000708	0.00541
CEL.14.110783830	rs13482028	0.00662	0.000534	0.00654
CEL.14.115300803	rs13475896	0.0022	0.000122	0.0016
CEL.14.115300803	rs13475902	0.00694	0.000381	0.00467
CEL.14.115300803	rs13475903	0.00704	0.000352	0.00476
CEL.14.115300803	rs13475906	0.00704	0.000352	0.00476
CEL.14.115300803	rs3163007	0.00303	0.000195	0.00245
CEL.14.115300803	rs6293581	0.0022	0.000122	0.0016
CEL.15.44698021	CEL.5.45872918	0.0157	0.000759	0.0136
CEL.15.44698021	gnf10.087.008	0.00185	7.56e-05	0.00149
CEL.15.44698021	rs13459085	0.00136	7.44e-05	0.00124
CEL.15.44698021	rs13478133	0.00355	0.000203	0.00307
CEL.15.44698021	rs13478148	0.00081	0.00016	0.000776
CEL.15.44698021	rs13478175	0.0011	5.95e-05	0.00101
CEL.15.44698021	rs13478184	0.00287	0.000177	0.00266
CEL.15.44698021	rs13478217	0.00881	0.000833	0.0084
CEL.15.44698021	rs13480687	0.0014	4.84e-05	0.00114
CEL.15.44698021	rs13481990	0.00165	0.000197	0.00173
CEL.15.44698021	rs13482000	0.00701	0.000538	0.00673
CEL.15.44698021	rs3088752	0.000782	6.5e-05	0.000829
CEL.15.44698021	rs3688959	0.00338	0.00019	0.00318
CEL.15.44698021	rs3718102	0.00413	0.00077	0.00428
CEL.15.44698021	rs3718492	0.00212	0.00016	0.00201
CEL.15.44698021	rs4225096	0.000503	2.51e-05	0.00041
CEL.15.44698021	rs6389588	0.00381	0.0003	0.00367
CEL.15.48446430	CEL.5.45872918	0.00792	0.000122	0.00592
CEL.15.48446430	gnf13.099.677	0.0148	0.000431	0.0129
CEL.15.48446430	rs13459085	0.00783	0.000716	0.00673
CEL.15.48446430	rs13478175	0.0065	0.000582	0.00557
CEL.15.48446430	rs13478217	0.00311	9.44e-05	0.00273
CEL.15.48446430	rs13478223	0.0114	0.000194	0.00867
CEL.15.48446430	rs13481964	0.0106	0.000348	0.00954
CEL.15.48446430	rs13481990	0.0044	0.000247	0.00476
CEL.15.48446430	rs3088752	0.0032	0.000298	0.00341
CEL.15.48446430	rs3688959	0.00673	0.000448	0.00732
CEL.15.48446430	rs3708975	0.00163	0.000832	0.00156
CEL.15.48446430	rs4225096	0.00172	0.000404	0.00176
CEL.15.93579770	rs13481651	0.00101	0.00066	0.00101
CEL.15.93579770	rs3654706	0.00027	0.000119	0.000277
CEL.15.93579770	rs3679276	0.000143	5.05e-05	0.000153
CEL.15.93579770	rs3709829	0.000228	0.000108	0.000229
CEL.15.93579770	rs3711281	9.05e-05	3.21e-05	9.91e-05
CEL.15.93579770	rs4229612	0.000227	0.000107	0.000228
CEL.17.21229557	mCV23509126	0.00076	0.000541	0.000775
CEL.17.21229557	rs6213386	0.00199	0.000706	0.00211
CEL.18.32158369	rs3684076	0.000758	7.21e-05	0.000825
CEL.18.32158369	rs3697686	0.00615	0.000884	0.00661
CEL.18.4270744	gnf17.069.331	0.0133	0.00049	0.0113
CEL.18.4270744	rs13480792	0.00474	0.000254	0.00436
CEL.18.4270744	rs13483210	0.00361	0.000939	0.0017
CEL.18.4270744	rs3659572	0.00582	0.000317	0.00526
CEL.18.4270744	rs6210797	0.0181	0.00067	0.0153
CEL.18.4270744	rs6368237	0.00868	0.000966	0.00464
CEL.18.52103795	rs13477893	0.00151	0.0009	0.00175
CEL.18.52103795	rs3023260	0.000138	0.000448	0.000167
CEL.18.52103795	rs3687889	0.000459	0.0012	0.000532
CEL.18.52103795	rs3697686	7e-05	0.000151	7.93e-05
CEL.18.52103795	rs6397486	0.000594	0.00117	0.000708
CEL.18.55824525	rs3687889	0.000118	9.39e-05	9.7e-05
CEL.18.55824525	rs3690631	0.000381	0.000249	0.000319
CEL.18.55824525	rs6397486	0.000174	9.12e-05	0.000142
CEL.18.60214752	CEL.4.34055416	0.00311	0.000664	0.00191
CEL.18.60214752	rs13477400	0.00173	0.000664	0.00105
CEL.18.60214752	rs13477410	0.00184	0.000759	0.00165
CEL.18.60214752	rs13477649	0.00406	0.000427	0.00245
CEL.18.60214752	rs13480454	0.00088	4.17e-05	0.000879
CEL.18.60214752	rs3658914	0.00223	0.000683	0.00148
CEL.18.60214752	rs3670168	0.00167	0.00093	0.00131
CEL.18.60214752	rs3673613	0.00118	0.000446	0.00112
CEL.18.60214752	rs3697980	0.00107	0.000377	0.00101
CEL.18.60214752	rs3719299	0.00263	0.000312	0.00166
CEL.18.60214752	rs3723953	0.00724	9.9e-05	0.00532
CEL.18.60214752	rs6316481	0.0113	0.000923	0.00996
CEL.18.73439948	gnf09.096.289	0.00102	0.000799	0.00115
CEL.18.73439948	mCV25328470	0.000888	3.33e-05	0.000786
CEL.18.73439948	rs13476563	0.00123	0.000878	0.000894
CEL.18.73439948	rs13480288	0.000989	4.95e-05	0.000875
CEL.18.73439948	rs13480351	0.00369	0.0008	0.00462
CEL.18.73439948	rs13480367	0.00108	0.000826	0.00121
CEL.18.73439948	rs3658458	0.00223	0.000373	0.00225
CEL.18.73439948	rs3690580	0.00123	0.000939	0.00139
CEL.18.73439948	rs3724833	0.000835	3.23e-05	0.000715
CEL.18.73439948	rs8263587	0.000519	0.000233	0.000384
CEL.19.32349880	gnf01.037.906	0.00247	0.00038	0.00235
CEL.19.32349880	rs13477448	0.00171	0.000315	0.00175
CEL.19.32349880	rs13478667	0.0153	0.000698	0.0129
CEL.19.32349880	rs13482612	0.00229	0.000466	0.00212
CEL.19.32349880	rs13482618	0.000397	8.85e-05	0.000359
CEL.19.32349880	rs13482628	9.28e-05	2.01e-05	9.06e-05
CEL.19.32349880	rs13482635	0.000176	4.39e-05	0.000173
CEL.19.32349880	rs13482637	0.000195	3.5e-05	0.000214
CEL.19.32349880	rs13482642	0.000813	0.000203	0.000811
CEL.19.32349880	rs3663706	0.00077	0.000133	0.00077
CEL.19.32349880	rs4224277	0.00172	0.000436	0.00174
CEL.19.32349880	rs6189225	0.00127	0.000219	0.00132
CEL.19.32349880	rs6197332	0.000131	2.99e-05	0.000133
CEL.19.32349880	rs6204870	0.000237	4.37e-05	0.000265
CEL.19.48242857	rs3089995	0.000868	0.000376	0.000837
CEL.19.48242857	rs6188239	0.00102	0.000744	0.00103
CEL.19.8529644	rs13481958	0.000277	0.000444	0.000344
CEL.19.8529644	rs13481964	0.000785	0.00185	0.00109
CEL.19.8529644	rs3719258	0.00521	0.000994	0.00756
CEL.2.113459249	rs13478717	0.000429	0.000227	0.000417
CEL.2.113459249	rs4197725	0.000484	0.000498	0.000476
CEL.2.79237503	rs3688959	0.00608	0.000711	0.0062
CEL.2.79237503	rs6321462	0.00218	0.000482	0.00236
CEL.2.79237503	rs6389588	0.00413	0.000562	0.00388
CEL.3.137067761	rs3656982	0.000435	0.000459	0.000544
CEL.3.145329096	rs13479601	0.00356	0.00058	0.00324
CEL.3.145329096	rs6221589	0.00189	0.00089	0.00193
CEL.3.46558020	rs3667933	0.00411	0.000595	0.0039
CEL.3.46558020	rs3718262	0.00155	0.000367	0.00179
CEL.3.46558020	rs4139735	0.00155	0.000371	0.0018
CEL.3.46558020	rs6407863	0.0041	0.000592	0.00391
CEL.4.120039566	rs13481561	0.00398	0.000499	0.00438
CEL.4.120039566	rs3654718	0.00198	0.000218	0.00206
CEL.4.120039566	rs3684754	0.000998	0.0017	0.00108
CEL.4.120039566	rs6263380	0.00388	0.000707	0.00419
CEL.4.30832818	rs13480510	0.00125	0.000726	0.00112
CEL.4.34055416	rs13483378	0.00277	0.000638	0.00287
CEL.4.34055416	rs13483382	0.00201	0.000262	0.00185
CEL.4.40541402	rs3653534	0.00325	0.000677	0.00255
CEL.4.40541402	rs4198737	0.000247	0.000397	0.000357
CEL.4.40541402	rs8238898	0.00295	0.000664	0.00243
CEL.4.78089985	rs6221589	0.000496	0.00121	0.000531
CEL.5.120064766	rs3687889	0.000344	0.000465	0.000338
CEL.5.45872918	gnf08.064.413	0.0101	0.000533	0.00554
CEL.5.45872918	rs13479799	0.00819	0.000528	0.00472
CEL.5.45872918	rs13479811	0.0108	0.000666	0.00731
CEL.5.45872918	rs13479814	0.0087	0.000777	0.00552
CEL.5.45872918	rs13482536	0.0175	0.000965	0.0163
CEL.5.45872918	rs13482558	0.00606	0.000131	0.00465
CEL.5.45872918	rs13482580	0.0031	0.000133	0.00268
CEL.5.45872918	rs13482589	0.00878	0.000573	0.00814
CEL.5.45872918	rs3089995	0.00226	0.000474	0.00216
CEL.5.45872918	rs3660290	0.00306	9.87e-05	0.00255
CEL.5.45872918	rs3660367	0.00951	0.000758	0.00918
CEL.5.45872918	rs3692040	0.00305	9.68e-05	0.00254
CEL.5.45872918	rs3694940	0.0101	0.000533	0.00554
CEL.5.45872918	rs3695416	0.00675	0.000795	0.0072
CEL.5.45872918	rs3721372	0.00735	0.00097	0.00812
CEL.5.45872918	rs4138760	0.00544	0.000112	0.00414
CEL.5.45872918	rs4230908	0.000793	5.97e-05	0.000844
CEL.5.45872918	rs6165881	0.00203	6.02e-05	0.0017
CEL.5.45872918	rs6188239	0.00213	0.000699	0.00225
CEL.5.45872918	rs6287472	3.62e-05	1.49e-05	4.56e-05
CEL.5.45872918	rs6288205	5.77e-05	1.46e-05	6.94e-05
CEL.5.45872918	rs6410533	6.89e-05	1.67e-05	8.16e-05
CEL.7.126301023	rs6318987	0.00654	0.000979	0.00603
CEL.7.12787527	rs13479860	0.00147	0.000918	0.00106
CEL.7.12787527	rs3696786	0.00119	0.000765	0.000815
CEL.7.77948585	rs13476125	0.00574	0.000392	0.00508
CEL.7.77948585	rs3678662	0.00735	0.000716	0.0064
CEL.7.77948585	rs3711945	0.00219	0.000695	0.00206
CEL.7.77948585	rs6250257	0.00626	0.000416	0.00661
CEL.7.77948585	rs6308228	0.000413	0.000126	0.000392
CEL.8.25677705	CZECH.10.116791624	0.000266	0.000257	0.000354
CEL.8.25677705	rs3700579	0.00341	0.000835	0.00522
CEL.8.25677705	rs6256918	0.000979	0.00166	0.00122
CEL.8.25677705	rs6284081	0.000761	0.00167	0.000883
CEL.8.25677705	rs6335076	0.000266	0.000257	0.000354
CEL.8.25677705	rs6363315	0.000266	0.000257	0.000354
CEL.9.29909656	rs13477261	0.00273	0.000764	0.00232
CEL.9.92503233	mCV25373751	0.00524	8.88e-05	0.00401
CEL.9.92503233	rs13477123	0.003	0.000567	0.00304
CEL.9.92503233	rs13480236	0.00142	0.000552	0.00244
CEL.9.92503233	rs13480273	0.00218	0.000711	0.00128
CEL.9.92503233	rs13480703	0.0159	0.000676	0.0128
CEL.9.92503233	rs13480712	0.00251	0.000397	0.00274
CEL.9.92503233	rs3658458	0.00351	0.000799	0.00239
CEL.9.92503233	rs3661495	0.000365	5.32e-05	0.000354
CEL.9.92503233	rs3664300	0.00113	0.00049	0.002
CEL.9.92503233	rs3670579	0.00298	0.000611	0.00435
CEL.9.92503233	rs3701829	0.0058	0.000104	0.0045
CEL.9.92503233	rs3716689	0.00487	0.000864	0.00481
CZECH.10.116791624	gnf07.120.460	0.00601	0.000616	0.00828
CZECH.10.116791624	rs13480773	0.00218	0.00171	0.000891
CZECH.10.116791624	rs3670118	0.00159	0.00105	0.000957
CZECH.10.116791624	rs4225096	0.0107	0.000957	0.00974
CZECH.10.116791624	rs4228477	0.00134	0.000839	0.000513
CZECH.10.116791624	rs6177803	0.00569	0.000216	0.008
CZECH.10.116791624	rs6201222	0.00177	0.00102	0.000642
CZECH.10.116791624	rs6256918	0.00142	0.000726	0.000781
gnf01.037.906	rs13483599	0.00247	0.00038	0.00235
gnf01.037.906	rs13483601	0.00189	0.000334	0.00182
gnf01.037.906	rs3714482	0.00173	0.000897	0.00175
gnf01.037.906	rs4211515	0.00101	0.000734	0.00102
gnf01.037.906	rs4212102	0.00114	0.000294	0.00106
gnf01.037.906	rs4219239	0.000385	0.000595	0.00043
gnf01.117.970	rs13480797	0.00703	0.000646	0.00655
gnf01.117.970	rs13481375	0.00109	0.000392	0.000952
gnf01.117.970	rs3695382	0.00885	0.000988	0.00885
gnf01.117.970	rs3697980	0.00148	0.000739	0.00155
gnf01.117.970	rs6185704	0.00188	0.000438	0.0019
gnf01.117.970	rs6197961	0.00703	0.000646	0.00655
gnf01.117.970	rs6223000	0.00307	0.00095	0.00246
gnf01.117.970	rs6390855	0.0025	0.000969	0.00221
gnf01.117.970	UT.12.24.561109	0.002	0.00083	0.00188
gnf01.157.188	rs3695386	0.000704	0.00126	0.000719
gnf02.161.674	rs13477307	0.00345	0.000478	0.00234
gnf02.161.674	rs13477309	0.00351	0.000447	0.00281
gnf02.161.674	rs13477313	0.0054	0.000694	0.0045
gnf02.161.674	rs13481571	0.00549	0.000724	0.00728
gnf02.161.674	rs3684333	0.0049	0.000618	0.00398
gnf02.161.674	rs6263380	0.0073	0.00063	0.00783
gnf02.161.674	rs8256683	0.00355	0.000939	0.0031
gnf03.036.164	rs3718262	0.00368	0.000891	0.00379
gnf03.036.164	rs4139735	0.00368	0.000903	0.0038
gnf03.051.000	gnf09.096.289	0.00782	0.000832	0.00586
gnf03.051.000	rs13480367	0.00927	0.000907	0.00674
gnf03.073.308	rs13476308	0.00172	0.000782	0.00146
gnf03.073.308	rs13476312	0.0011	0.000483	0.000943
gnf03.073.308	rs13477355	0.000707	3.5e-05	0.000767
gnf03.073.308	rs13493060	0.00174	0.000844	0.00152
gnf03.073.308	rs3707642	0.00266	0.000445	0.00249
gnf03.073.308	rs4137502	0.00531	0.000893	0.00483
gnf04.018.158	rs6393330	0.000441	0.00183	0.000631
gnf04.029.494	rs13480510	0.00162	0.000899	0.0014
gnf04.029.494	rs13480531	0.00152	0.0009	0.00147
gnf04.062.327	rs3711950	0.000701	0.00034	0.000374
gnf04.062.327	rs6221589	0.000302	0.000174	0.000298
gnf04.062.327	rs6409508	0.000394	0.000185	0.000345
gnf05.069.163	rs13477529	0.00381	0.00097	0.00355
gnf06.037.785	rs13459087	0.000493	0.00014	0.000477
gnf06.037.785	rs13478355	0.00268	0.000635	0.00236
gnf06.037.785	rs13478361	0.00268	0.000635	0.00236
gnf06.037.785	rs13478370	0.00051	0.000147	0.000417
gnf06.037.785	rs13478383	0.000199	6.31e-05	0.00022
gnf06.037.785	rs3667067	0.000493	0.00014	0.000477
gnf06.037.785	rs3678577	0.00305	0.000674	0.0027
gnf06.058.959	rs3688955	0.00321	0.000672	0.00315
gnf06.092.758	rs6178370	0.00418	0.000713	0.00407
gnf06.092.758	rs6220079	0.0362	0.000889	0.032
gnf06.093.201	rs13481669	0.00165	0.000513	0.00187
gnf06.093.201	rs3686663	0.00165	0.000513	0.00187
gnf06.093.201	rs3695486	0.00165	0.000513	0.00186
gnf06.093.201	rs6178370	0.0018	0.000375	0.00189
gnf06.093.201	rs6215262	0.00165	0.000513	0.00187
gnf06.093.201	rs6239339	0.00362	0.000771	0.00383
gnf06.093.201	rs6243819	0.0025	0.000673	0.00285
gnf06.093.201	rs6250327	0.00362	0.000771	0.00383
gnf06.093.201	rs6298246	0.00165	0.000513	0.00187
gnf06.093.201	rs6301008	0.00362	0.000771	0.00383
gnf06.093.201	rs6318987	0.00315	0.000807	0.00345
gnf06.093.201	rs6343634	0.00232	0.000681	0.00264
gnf06.105.887	rs8236684	0.00344	0.000851	0.00311
gnf06.122.747	rs13476472	0.000343	0.00216	0.000449
gnf06.122.747	rs13476473	0.000343	0.00216	0.000449
gnf06.122.747	rs8236684	0.00392	0.000487	0.00349
gnf06.139.257	rs6400804	0.000674	0.000295	0.000605
gnf07.032.360	rs13482276	0.00684	0.000433	0.00601
gnf07.032.360	rs13482281	0.0111	0.000894	0.01
gnf07.032.360	rs13482290	0.00712	0.000595	0.00637
gnf07.032.360	rs13482296	0.00652	0.000553	0.00587
gnf07.032.360	rs3663148	0.00546	0.000485	0.00486
gnf07.032.360	rs3667933	0.00444	0.000324	0.00387
gnf07.032.360	rs3718262	0.00577	0.000472	0.00468
gnf07.032.360	rs4139735	0.0063	0.000565	0.00517
gnf07.032.360	rs4202372	0.002	0.000816	0.00179
gnf07.032.360	rs6224196	0.00419	0.000769	0.00223
gnf07.032.360	rs6407863	0.00453	0.000358	0.0039
gnf07.056.997	mCV23128760	0.00242	0.000765	0.002
gnf07.056.997	mCV23209429	0.00289	0.000749	0.0039
gnf07.056.997	rs13459063	0.00253	0.000634	0.00345
gnf07.056.997	rs13476425	0.00254	0.000515	0.00318
gnf07.056.997	rs13482206	0.0026	0.000826	0.00214
gnf07.056.997	rs8244195	0.00251	0.000872	0.00294
gnf07.120.460	rs13482691	0.0101	0.000879	0.00893
gnf07.120.460	rs4211515	0.00144	0.000796	0.00151
gnf07.120.460	rs4228477	0.00704	0.000883	0.0101
gnf07.120.460	rs6335076	0.00601	0.000616	0.00828
gnf07.120.460	rs6363315	0.00601	0.000616	0.00828
gnf08.064.413	rs13478223	0.00944	0.000582	0.0055
gnf08.064.413	rs4180126	0.0056	0.000595	0.00574
gnf08.064.413	rs4185176	0.0034	0.000214	0.00392
gnf08.064.413	rs4185639	0.00457	0.000328	0.00535
gnf08.064.413	rs6243167	0.0088	0.000952	0.00816
gnf09.009.970	rs3022886	0.00257	0.000897	0.00297
gnf09.009.970	rs4152386	0.000827	0.00275	0.000961
gnf09.044.276	rs13483075	0.000605	0.000656	0.000837
gnf09.087.298	rs3661495	0.00173	0.000676	0.00172
gnf09.087.298	rs3664300	0.00342	0.000896	0.00518
gnf09.096.289	rs13477123	0.00434	0.000166	0.00386
gnf09.096.289	rs13477127	0.0119	0.000763	0.00957
gnf09.096.289	rs13477144	0.0125	0.000915	0.0109
gnf09.096.289	rs3661495	0.00932	0.000838	0.00856
gnf09.096.289	rs3671459	0.00418	0.000369	0.00255
gnf09.096.289	rs3719360	0.00639	0.000511	0.00364
gnf09.096.289	rs4192132	0.00141	0.000486	0.00149
gnf09.096.289	rs4197416	0.00126	0.000703	0.00104
gnf09.096.289	rs4197725	0.000397	0.000253	0.000343
gnf09.096.289	rs4198737	0.000301	4.91e-05	0.000211
gnf09.096.289	rs6335414	0.00421	0.000466	0.00315
gnf10.087.008	rs13477991	0.0105	0.000615	0.01
gnf10.087.008	rs13481641	0.00153	0.000153	0.00144
gnf10.087.008	rs13481651	0.000338	2.93e-05	0.000329
gnf10.087.008	rs13482536	0.00558	0.000188	0.005
gnf10.087.008	rs13482541	0.00355	0.000122	0.00306
gnf10.087.008	rs3654706	0.000204	3.58e-05	0.000196
gnf10.087.008	rs3663950	0.00437	0.00071	0.00431
gnf10.087.008	rs3679276	0.000553	0.0002	0.000529
gnf10.087.008	rs3695416	0.00833	0.000815	0.00737
gnf10.087.008	rs3709829	0.000238	2.72e-05	0.000232
gnf10.087.008	rs3711281	0.000558	0.000232	0.000563
gnf10.087.008	rs4224808	0.0124	0.000851	0.0118
gnf10.087.008	rs4229612	0.000252	3.39e-05	0.000246
gnf11.093.966	rs13480993	0.00397	0.000553	0.00345
gnf11.121.400	rs3708471	0.00097	0.000951	0.00103
gnf11.121.400	rs3718727	0.00608	0.000952	0.00598
gnf11.121.400	rs3720797	0.00355	0.000598	0.00366
gnf11.121.400	rs4229817	0.0028	0.000355	0.00287
gnf11.125.992	mCV24625340	0.0011	0.000728	0.00201
gnf11.125.992	rs6296621	0.00104	0.000535	0.00135
gnf12.033.545	rs13476079	0.00448	0.000472	0.00463
gnf12.033.545	rs13476086	0.00155	0.000164	0.00149
gnf12.033.545	rs13476089	0.00155	0.000164	0.00149
gnf12.033.545	rs3686671	0.00155	0.000164	0.00149
gnf12.033.545	rs3694822	0.00141	0.000179	0.00136
gnf12.033.545	rs3717360	0.00153	0.000163	0.00149
gnf12.033.545	rs3719973	0.005	0.000528	0.00486
gnf12.053.286	rs13476122	0.00242	0.000853	0.00298
gnf12.053.286	rs4230930	0.00573	0.000934	0.0043
gnf13.016.175	rs13476457	0.015	0.000356	0.0147
gnf13.016.175	rs13476462	0.0145	0.000345	0.0141
gnf13.016.175	rs13476472	0.0117	0.000392	0.0119
gnf13.016.175	rs13476473	0.0117	0.000392	0.0119
gnf13.016.175	rs13476476	0.0205	0.000875	0.0191
gnf13.016.175	rs13476563	0.00901	0.000869	0.00936
gnf13.016.175	rs13477546	0.00104	0.000788	0.00135
gnf13.016.175	rs4175608	0.00192	0.000251	0.00189
gnf13.016.175	rs4178513	0.00209	0.000799	0.00222
gnf13.016.175	rs6313371	0.0138	0.000281	0.0135
gnf13.016.175	rs8263587	0.00179	7.18e-05	0.00186
gnf13.020.621	mCV24555989	0.000447	0.000329	0.000376
gnf13.038.133	rs3707274	0.000157	6.05e-05	0.000164
gnf13.038.133	rs3710499	0.000375	9.67e-05	0.000397
gnf13.038.133	UT.11.29.443258	0.00113	0.000405	0.00119
gnf13.042.658	rs13479099	0.000664	0.00141	0.000719
gnf13.042.658	rs3023105	0.0009	0.00172	0.000937
gnf13.042.658	rs3712253	0.000664	0.00141	0.000719
gnf13.042.658	rs6265387	0.000664	0.00141	0.000719
gnf13.057.762	rs13481220	0.00858	0.000487	0.00802
gnf13.057.762	rs13481228	0.00241	0.000446	0.00255
gnf13.057.762	rs6216320	0.00161	0.000674	0.00156
gnf13.092.499	rs13476472	0.00154	0.000138	0.00128
gnf13.092.499	rs13476473	0.00154	0.000138	0.00128
gnf13.092.499	rs13476476	0.0116	0.000952	0.0108
gnf13.092.499	rs3022886	0.00934	0.000583	0.00813
gnf13.092.499	rs3718711	0.00127	0.000134	0.0011
gnf13.092.499	rs6247544	0.00342	0.000697	0.00306
gnf13.099.677	rs13482558	0.0138	0.000492	0.012
gnf13.099.677	rs13482580	0.00938	0.000526	0.00882
gnf13.099.677	rs13482589	0.00581	0.000569	0.00525
gnf13.099.677	rs13482612	0.00775	0.000787	0.00759
gnf13.099.677	rs13482618	0.00352	0.000495	0.00356
gnf13.099.677	rs13482628	0.00828	0.000999	0.00832
gnf13.099.677	rs3654706	0.0112	0.000767	0.0107
gnf13.099.677	rs3660290	0.00192	0.000163	0.00185
gnf13.099.677	rs3692040	0.00192	0.000163	0.00185
gnf13.099.677	rs3709829	0.0135	0.00061	0.0131
gnf13.099.677	rs3718711	0.00401	0.000593	0.00371
gnf13.099.677	rs4138760	0.0137	0.000489	0.0119
gnf13.099.677	rs4229612	0.0135	0.000599	0.013
gnf13.099.677	rs6165881	0.00266	0.000174	0.00251
gnf14.117.278	rs13475896	0.00262	0.000386	0.00216
gnf14.117.278	rs3163007	0.00385	0.000592	0.00347
gnf14.117.278	rs6293581	0.00262	0.000386	0.00216
gnf17.027.979	mCV23509126	0.000453	0.000181	0.000522
gnf17.027.979	rs13476237	0.00175	0.000569	0.00197
gnf17.027.979	rs13476241	0.000819	0.000238	0.00102
gnf17.027.979	rs13476248	0.000231	4.65e-05	0.000252
gnf17.027.979	rs13476258	0.000516	0.000187	0.000569
gnf17.027.979	rs3723788	0.000613	0.000231	0.00071
gnf17.027.979	rs6213386	0.000202	3.87e-05	0.000219
gnf17.069.331	gnf18.002.818	0.0119	0.000404	0.0105
gnf17.069.331	mCV23617245	0.00489	0.000254	0.00574
gnf17.069.331	rs13480172	0.00376	0.000852	0.00388
gnf17.069.331	rs13483183	0.0133	0.000494	0.0113
gnf17.069.331	rs13483200	0.00974	0.000397	0.00879
gnf17.069.331	rs13483210	0.000973	2.04e-05	0.000953
gnf17.069.331	rs13483215	0.00282	8.02e-05	0.00276
gnf17.069.331	rs3673816	0.0027	0.000689	0.00287
gnf17.069.331	rs3680906	0.0119	0.000404	0.0105
gnf17.069.331	rs3689558	0.00936	0.000229	0.00838
gnf18.002.818	rs13483210	0.00212	0.00035	0.000812
gnf18.002.818	rs13483215	0.0028	0.000458	0.0011
gnf18.002.818	rs13483244	0.00374	0.000939	0.00214
gnf18.002.818	rs3657117	0.0221	0.000878	0.0212
gnf18.002.818	rs6210797	0.0147	0.000381	0.012
gnf18.002.818	rs6368237	0.00626	0.000548	0.00325
gnf18.051.412	rs3687889	0.00022	0.000575	0.000234
gnf18.051.412	rs3690631	0.000607	0.00125	0.000662
gnf18.051.412	rs3697686	0.000588	0.00135	0.000665
gnf18.051.412	rs6397486	0.000176	0.000345	0.0002
gnf18.069.928	mCV25328470	0.00129	5.82e-05	0.00112
gnf18.069.928	rs13480288	0.0014	8.36e-05	0.00122
gnf18.069.928	rs13480351	0.00336	0.000903	0.00479
gnf18.069.928	rs3658458	0.00306	0.000597	0.0031
gnf18.069.928	rs3724833	0.0012	5.6e-05	0.00101
gnf18.069.928	rs8263587	0.00124	0.000497	0.000864
mCV22668736	rs13478595	0.00301	0.000669	0.00268
mCV22668736	rs3718776	0.00301	0.000669	0.00268
mCV22824651	rs6223000	0.000758	0.000452	0.000675
mCV22824651	rs6316813	0.000576	0.000953	0.000496
mCV22888090	rs13478051	0.00392	0.00067	0.00966
mCV22888090	rs13482262	0.000519	0.00107	0.00148
mCV22888090	rs13482272	0.000843	0.00227	0.00228
mCV22888090	rs3689558	0.00789	0.000718	0.0161
mCV22888090	rs3706792	0.000774	0.00128	0.00184
mCV22888090	rs3711702	0.000741	0.00812	0.000865
mCV22888090	rs3720325	0.00297	0.000564	0.00741
mCV22888090	rs6352085	0.000872	0.00171	0.00225
mCV22888090	UT.4.146.099338	0.0056	0.000695	0.0126
mCV22888090	UT.4.147.232882	0.00384	0.00069	0.0101
mCV22895274	rs13477546	0.000549	0.000709	0.000587
mCV22895274	rs3683221	0.00414	0.000306	0.00363
mCV23042866	rs8236684	0.00253	0.000426	0.00236
mCV23057534	rs13483409	0.00329	0.000967	0.00462
mCV23057534	rs3688789	0.00157	0.000199	0.00113
mCV23128760	mCV25303361	0.000613	0.000279	0.000387
mCV23128760	rs13479325	0.000829	0.00017	0.000661
mCV23128760	rs13479342	0.000285	0.000183	0.00021
mCV23128760	rs13479347	0.00185	0.000957	0.00134
mCV23128760	rs13479351	0.00185	0.000957	0.00134
mCV23128760	rs3667441	0.00166	0.000663	0.00155
mCV23128760	rs3676254	0.000409	9.8e-05	0.000309
mCV23128760	rs3679779	0.00253	0.000763	0.00204
mCV23128760	rs3693478	0.00205	0.000628	0.00163
mCV23128760	rs3723790	0.003	0.000554	0.00297
mCV23128760	rs6160140	0.00191	0.000598	0.00176
mCV23128760	rs6296859	0.000783	0.00022	0.00056
mCV23169908	rs13480454	0.000983	0.000284	0.000794
mCV23169908	rs3669563	0.000489	0.000142	0.000421
mCV23169908	rs6299531	0.00287	0.000681	0.00262
mCV23169908	rs6320810	0.00175	0.000559	0.00158
mCV23169908	rs8241505	0.0047	0.00071	0.00278
mCV23209429	rs13476125	0.000844	0.00172	0.00128
mCV23209429	rs13479276	0.000352	6.69e-05	0.000408
mCV23209429	rs13479325	0.000485	0.000236	0.000759
mCV23209429	rs13481669	0.00346	0.000407	0.00412
mCV23209429	rs13481689	0.00258	0.0005	0.00343
mCV23209429	rs13481702	0.00769	0.000739	0.00967
mCV23209429	rs13482711	0.000984	0.00025	0.00132
mCV23209429	rs3686663	0.00346	0.000407	0.00412
mCV23209429	rs3693478	0.00336	0.000883	0.00455
mCV23209429	rs3695486	0.00349	0.000407	0.00414
mCV23209429	rs3696018	0.000547	0.000119	0.00067
mCV23209429	rs3717293	0.000807	0.000133	0.000961
mCV23209429	rs3723790	0.0019	0.000697	0.00414
mCV23209429	rs6178370	0.00143	0.000179	0.0018
mCV23209429	rs6215262	0.00346	0.000407	0.00412
mCV23209429	rs6239339	0.00428	0.000581	0.00521
mCV23209429	rs6243819	0.00416	0.000494	0.00498
mCV23209429	rs6250257	0.000211	0.000595	0.000338
mCV23209429	rs6250327	0.00428	0.000581	0.00521
mCV23209429	rs6287697	0.00669	0.000911	0.00682
mCV23209429	rs6298246	0.00346	0.000407	0.00412
mCV23209429	rs6301008	0.00428	0.000581	0.00521
mCV23209429	rs6318987	0.00601	0.000668	0.007
mCV23209429	rs6329684	0.00337	0.000444	0.00417
mCV23209429	rs6343634	0.00417	0.000492	0.00498
mCV23209429	rs6396465	0.00363	0.000491	0.00451
mCV23509126	mCV25045820	0.000543	0.000344	0.000575
mCV23509126	rs13482580	9.74e-05	3.97e-05	0.000114
mCV23509126	rs13482589	0.00093	0.000428	0.00121
mCV23509126	rs13482870	0.000701	0.00184	0.000712
mCV23509126	rs13482887	0.000839	0.00104	0.000825
mCV23509126	rs3660290	0.000329	0.000126	0.000393
mCV23509126	rs3692040	0.000329	0.000126	0.000394
mCV23509126	rs3723317	0.000832	0.00101	0.000824
mCV23509126	rs6165881	0.000261	0.000145	0.00031
mCV23509126	rs6185197	0.000543	0.000344	0.000575
mCV23509126	rs6341891	0.000543	0.000344	0.000575
mCV23617245	rs3657117	0.00689	0.000503	0.00868
mCV23617245	rs6210797	0.0157	0.000572	0.0144
mCV24303778	rs13481090	0.00119	0.000466	0.00122
mCV24303778	rs13481093	0.00277	0.000902	0.00338
mCV24303778	UT.11.70.128831	0.000295	0.000123	0.00029
mCV24555989	rs13481727	0.0014	0.000792	0.00114
mCV24690992	rs3660367	0.00954	0.000474	0.00547
mCV24690992	rs4230930	0.0131	0.000893	0.00764
mCV24886326	rs13459121	0.000431	6.54e-05	0.000607
mCV24886326	rs13476563	0.000241	0.000244	0.000302
mCV24886326	rs13476667	0.00163	0.000855	0.00223
mCV24886326	rs13478051	0.000993	0.00092	0.00134
mCV24886326	rs13480547	0.00441	0.000682	0.00618
mCV24886326	rs3023233	8.93e-05	7.11e-06	0.000114
mCV24886326	rs3672342	0.00555	0.000786	0.00744
mCV24886326	rs3720634	0.00128	0.000719	0.00202
mCV24886326	rs4202372	0.000372	0.00173	0.000683
mCV24886326	rs6275228	0.00183	0.000931	0.00252
mCV24886326	rs6295014	0.000311	0.00044	0.000387
mCV24886326	rs6406705	0.000693	0.000383	0.000832
mCV24886326	rs8263587	0.000273	0.000365	0.000346
mCV25009162	rs13476286	0.00137	0.000555	0.00118
mCV25009162	rs13477546	0.000661	0.00129	0.000781
mCV25009162	rs13481618	0.00228	0.000537	0.00252
mCV25009162	rs3694793	0.0018	0.000818	0.00156
mCV25045820	rs13476248	0.00237	0.000836	0.00266
mCV25045820	rs6213386	0.00158	0.000521	0.00176
mCV25266528	rs13482032	0.000378	0.000289	0.000503
mCV25266528	rs3659866	0.00383	0.000689	0.00405
mCV25284008	rs13480454	0.0017	0.000737	0.00158
mCV25284008	rs6299531	0.0022	0.000245	0.00238
mCV25284008	rs6316481	0.000395	0.000119	0.000228
mCV25302097	rs13483075	0.00187	0.000625	0.00154
mCV25303361	rs13482206	0.000575	0.000259	0.000357
mCV25328470	rs13483417	0.00334	0.000913	0.00426
mCV25328470	rs13483423	0.00153	0.000193	0.00151
mCV25328470	rs3675825	0.0026	0.000323	0.00237
mCV25328470	rs3705890	0.00932	0.000562	0.00827
mCV25328470	rs3716803	0.00265	0.000473	0.00321
mCV25373751	rs13459085	0.00281	0.00033	0.00304
mCV25373751	rs13478175	0.00385	0.000411	0.00429
mCV25373751	rs13478184	0.0029	0.000218	0.00302
mCV25373751	rs13478204	0.00175	0.00041	0.00203
mCV25373751	rs13478217	0.000527	0.000239	0.000653
mCV25373751	rs13480351	0.00526	0.000119	0.00433
mCV25373751	rs13481651	0.00384	0.000674	0.00325
mCV25373751	rs13483144	0.000815	0.000328	0.000751
mCV25373751	rs3654706	0.000553	0.000305	0.000522
mCV25373751	rs3701338	0.00286	0.000811	0.00251
mCV25373751	rs3709829	0.000598	0.000218	0.000563
mCV25373751	rs3718492	0.00364	0.000352	0.00378
mCV25373751	rs4229612	0.00063	0.000263	0.000592
mCV25373751	rs6248036	0.00116	0.000547	0.00115
petM.05537.1	rs13477400	0.0026	0.000939	0.00219
petM.05537.1	rs3670168	0.000451	7.89e-05	0.000319
petM.05537.1	rs6299531	0.0236	0.000881	0.0204
rs13459063	rs13476125	0.0008	0.00163	0.00121
rs13459063	rs13479276	0.000304	5.53e-05	0.000352
rs13459063	rs13479325	0.00042	0.000198	0.000663
rs13459063	rs13481669	0.00216	0.000226	0.00263
rs13459063	rs13481689	0.00158	0.000278	0.00215
rs13459063	rs13481702	0.00494	0.000419	0.00637
rs13459063	rs13482711	0.000974	0.000249	0.00132
rs13459063	rs3679779	0.00418	0.000982	0.00577
rs13459063	rs3686663	0.00216	0.000226	0.00263
rs13459063	rs3688789	0.0133	0.000863	0.0113
rs13459063	rs3693478	0.00294	0.000749	0.00403
rs13459063	rs3695486	0.00218	0.000226	0.00263
rs13459063	rs3696018	0.000475	9.89e-05	0.000582
rs13459063	rs3717293	0.000709	0.000112	0.000846
rs13459063	rs3723790	0.00237	0.000863	0.00504
rs13459063	rs6178370	0.000863	9.66e-05	0.00111
rs13459063	rs6215262	0.00216	0.000226	0.00263
rs13459063	rs6239339	0.00269	0.000329	0.00334
rs13459063	rs6243819	0.00263	0.000279	0.0032
rs13459063	rs6250257	0.0002	0.000564	0.00032
rs13459063	rs6250327	0.00269	0.000329	0.00334
rs13459063	rs6287697	0.00476	0.000598	0.00488
rs13459063	rs6298246	0.00216	0.000226	0.00263
rs13459063	rs6301008	0.00269	0.000329	0.00334
rs13459063	rs6318987	0.00387	0.000381	0.00458
rs13459063	rs6329684	0.00209	0.000248	0.00264
rs13459063	rs6343634	0.00263	0.000277	0.0032
rs13459063	rs6396465	0.00226	0.000275	0.00287
rs13459085	rs13479624	5.99e-05	0.000246	7.26e-05
rs13459085	rs13479628	0.000344	0.000416	0.000317
rs13459085	rs13480703	0.00332	0.000589	0.00367
rs13459085	rs13481823	0.00497	0.000912	0.00466
rs13459085	rs13482536	0.00123	6.69e-05	0.00114
rs13459085	rs13482541	0.00118	5.04e-05	0.00109
rs13459085	rs13482580	0.00416	0.000171	0.00366
rs13459085	rs13482589	0.00814	0.000932	0.00688
rs13459085	rs13483144	0.000186	7.59e-05	0.00021
rs13459085	rs3089995	0.00393	0.000511	0.00372
rs13459085	rs3660290	0.00499	0.00039	0.00453
rs13459085	rs3677296	0.000956	5.84e-05	0.000944
rs13459085	rs3692040	0.00496	0.000383	0.0045
rs13459085	rs3695416	0.000875	5.15e-05	0.000854
rs13459085	rs3701829	0.00259	0.000294	0.00285
rs13459085	rs3710094	0.0123	0.000962	0.0117
rs13459085	rs3721372	0.0015	7.95e-05	0.00137
rs13459085	rs4230908	0.00585	0.000763	0.00623
rs13459085	rs6165881	0.00367	0.000272	0.00335
rs13459085	rs6188239	0.00459	0.000695	0.0044
rs13459085	rs6287472	0.000744	0.00103	0.001
rs13459085	rs6360325	0.0145	0.000846	0.0138
rs13459085	rs6410533	0.000482	0.000509	0.000617
rs13459098	rs13477127	0.0045	0.000827	0.00452
rs13459110	rs13482741	0.000438	0.000456	0.00037
rs13459120	rs13478133	0.00809	0.000939	0.00762
rs13459120	rs13479601	5.39e-05	1.35e-05	5.53e-05
rs13459120	rs13479624	0.0119	0.00094	0.00881
rs13459120	rs6273176	0.000864	0.000295	0.000804
rs13459120	rs6287472	0.000513	1.05e-05	0.000256
rs13459120	rs6288205	0.000199	3.94e-06	0.000108
rs13459120	rs6410533	0.000587	2.5e-05	0.000334
rs13459121	rs13474356	0.00387	0.000613	0.0028
rs13459121	rs13481308	0.000558	0.00437	0.00051
rs13459121	rs13481322	0.000115	0.00108	9.18e-05
rs13459121	rs13481361	0.000164	0.0022	0.000175
rs13459121	rs13482028	0.00121	0.000425	0.00119
rs13459121	rs3677161	0.00387	0.000613	0.0028
rs13459121	rs3717860	0.000431	0.00278	0.000355
rs13459121	rs3718992	0.000812	0.00821	0.000796
rs13459121	rs6209157	0.000835	0.0083	0.000814
rs13459121	rs6247696	0.000215	0.000143	0.000232
rs13459121	rs6328018	0.000167	0.00222	0.000175
rs13459121	rs6403731	0.000372	0.00374	0.000327
rs13459173	rs13483011	0.000884	0.0016	0.00109
rs13459185	rs13481308	0.000562	0.000665	0.000582
rs13459185	rs3660104	0.00146	0.000975	0.00175
rs13459185	rs3674810	0.0123	0.000902	0.0101
rs13459185	rs3718992	0.000986	0.00128	0.00101
rs13459185	rs6209157	0.000873	0.00117	0.000912
rs13459185	rs6334600	0.000985	0.000633	0.00116
rs13459185	rs8259443	0.00112	0.000791	0.00134
rs13469470	rs13481990	0.00253	0.00012	0.00206
rs13469470	rs13482000	0.000508	5.91e-05	0.000585
rs13469470	rs13482691	0.00916	0.000844	0.0077
rs13469470	rs3688959	0.00077	1.94e-05	0.000648
rs13469470	rs4198737	0.000723	0.000172	0.000725
rs13469470	rs4202372	0.0101	0.000802	0.00648
rs13469470	rs4205524	0.00336	0.00017	0.00188
rs13469470	rs4206648	0.00997	0.000515	0.00617
rs13469470	rs4207452	0.0116	0.000545	0.00721
rs13469470	rs6389588	0.00209	6.99e-05	0.00164
rs13474356	rs13481561	0.000611	5.65e-05	0.000559
rs13474356	rs13481575	0.00168	0.000743	0.00167
rs13474356	rs3654718	0.000696	0.000128	0.000574
rs13474356	rs6263380	0.000868	0.000153	0.000796
rs13475064	rs13481308	0.000801	0.000284	0.00082
rs13475064	rs13481514	0.00194	0.000672	0.00201
rs13475064	rs3660104	0.0011	0.000656	0.00107
rs13475064	rs3718992	0.00149	0.000631	0.00145
rs13475064	rs6209157	0.00132	0.000577	0.00131
rs13475064	rs6334600	0.000771	0.0005	0.000691
rs13475064	rs6403731	0.0025	0.00099	0.0024
rs13475064	rs8259443	0.000751	0.000588	0.000769
rs13475765	rs13482028	0.00104	0.000809	0.00122
rs13475765	rs13482032	0.000428	0.000293	0.000494
rs13475769	rs13482032	0.000509	0.000378	0.000578
rs13475774	rs13482032	0.000769	0.000611	0.00101
rs13475788	rs13482032	0.000412	0.000317	0.000557
rs13475788	rs3659866	0.00444	0.000785	0.00471
rs13475816	rs13477127	0.00204	0.000874	0.0016
rs13475816	rs4212102	0.00351	0.000553	0.00352
rs13475816	rs6363066	0.000844	0.00103	0.000787
rs13475837	rs4212102	0.00188	0.000852	0.0019
rs13475863	rs4211515	0.00127	0.00084	0.00131
rs13475863	rs4212102	0.00192	0.000667	0.00173
rs13475874	rs3690160	0.00101	0.00267	0.000895
rs13475894	rs3089995	0.00103	0.000299	0.00104
rs13475894	rs3091174	0.00394	0.000673	0.00403
rs13475894	rs6188239	0.00165	0.000563	0.00177
rs13475896	rs13482386	0.00144	0.000211	0.00142
rs13475896	rs13482416	0.00433	0.000313	0.00335
rs13475896	rs3682013	0.0049	0.000833	0.00414
rs13475902	rs13482386	0.00205	0.000311	0.0019
rs13475902	rs13482416	0.013	0.000923	0.00919
rs13475902	rs6223362	0.0132	0.000965	0.00842
rs13475903	rs13482386	0.00234	0.000334	0.00217
rs13475903	rs13482416	0.0132	0.000856	0.00935
rs13475903	rs6223362	0.013	0.000898	0.00853
rs13475906	rs13482386	0.00234	0.000334	0.00217
rs13475906	rs13482416	0.0132	0.000856	0.00935
rs13475906	rs6223362	0.013	0.000898	0.00853
rs13475919	rs3688789	0.000937	0.000132	0.000631
rs13475922	rs13483409	0.00267	0.000614	0.00365
rs13475922	rs3688789	0.00127	0.000123	0.000875
rs13475922	rs4223864	0.00175	0.000731	0.00177
rs13475922	rs6351323	0.00228	0.000985	0.00224
rs13475927	rs3688789	0.00175	0.000196	0.00113
rs13475931	rs3720325	0.0035	0.000777	0.00373
rs13475932	rs3720325	0.00351	0.000782	0.00376
rs13475970	rs6182405	0.00294	0.000471	0.00309
rs13475970	rs6223000	0.000245	0.000296	0.000247
rs13475973	rs6223000	0.000194	0.000208	0.000193
rs13475997	rs6223000	0.00157	0.000969	0.00155
rs13475999	rs6223000	0.00157	0.000979	0.00158
rs13476036	rs13481375	0.00337	0.00091	0.00299
rs13476036	rs6223000	0.00077	0.000366	0.000646
rs13476044	rs13481375	0.00279	0.000738	0.00257
rs13476044	rs6223000	0.000579	0.000268	0.000506
rs13476044	UT.12.24.561109	0.00297	0.000841	0.00277
rs13476045	rs13481375	0.00323	0.000855	0.00296
rs13476045	rs6223000	0.000692	0.00032	0.000603
rs13476045	UT.12.24.561109	0.00343	0.000971	0.00319
rs13476060	rs6223000	0.000758	0.000452	0.000675
rs13476060	rs6316813	0.000576	0.000953	0.000496
rs13476079	rs13480793	0.00671	0.000585	0.00611
rs13476079	rs13480797	0.00208	0.000157	0.00197
rs13476079	rs13481375	0.000282	0.00012	0.000277
rs13476079	rs3695382	0.00737	0.000742	0.0081
rs13476079	rs6185704	0.00285	0.000771	0.00295
rs13476079	rs6197175	0.0051	0.000403	0.00461
rs13476079	rs6197961	0.00208	0.000157	0.00197
rs13476079	rs6223000	0.00143	0.000386	0.00133
rs13476079	rs6390855	0.000841	0.000382	0.000831
rs13476079	UT.12.24.561109	0.000427	0.000206	0.000452
rs13476086	rs13480793	0.00386	0.000199	0.00328
rs13476086	rs13480797	0.0012	5.58e-05	0.00101
rs13476086	rs13481322	0.00233	0.00077	0.00238
rs13476086	rs13481375	0.000509	0.000187	0.000442
rs13476086	rs3695382	0.00256	0.000299	0.00269
rs13476086	rs3697980	0.0026	0.000646	0.00257
rs13476086	rs4211515	0.00479	0.000788	0.00429
rs13476086	rs6185704	0.00743	0.000843	0.00707
rs13476086	rs6197175	0.00267	0.000123	0.00226
rs13476086	rs6197961	0.0012	5.58e-05	0.00101
rs13476086	rs6223000	0.00169	0.000453	0.00147
rs13476086	rs6390855	0.00157	0.00068	0.00142
rs13476086	UT.12.24.561109	0.000662	0.000239	0.000571
rs13476089	rs13480793	0.00386	0.000199	0.00328
rs13476089	rs13480797	0.0012	5.58e-05	0.00101
rs13476089	rs13481322	0.00233	0.00077	0.00238
rs13476089	rs13481375	0.000509	0.000187	0.000442
rs13476089	rs3695382	0.00256	0.000299	0.00269
rs13476089	rs3697980	0.0026	0.000646	0.00257
rs13476089	rs4211515	0.00479	0.000788	0.00429
rs13476089	rs6185704	0.00743	0.000843	0.00707
rs13476089	rs6197175	0.00267	0.000123	0.00226
rs13476089	rs6197961	0.0012	5.58e-05	0.00101
rs13476089	rs6223000	0.00169	0.000453	0.00147
rs13476089	rs6390855	0.00157	0.00068	0.00142
rs13476089	UT.12.24.561109	0.000662	0.000239	0.000571
rs13476094	rs13480766	0.00037	0.000301	0.000419
rs13476094	rs13480797	0.00277	0.000401	0.00265
rs13476094	rs4228477	0.00113	0.00077	0.00115
rs13476094	rs6197175	0.00579	0.000801	0.00534
rs13476094	rs6197961	0.00277	0.000401	0.00265
rs13476095	rs13480766	0.000369	0.000305	0.00042
rs13476095	rs13480797	0.00275	0.000397	0.00264
rs13476095	rs4228477	0.00121	0.000871	0.00124
rs13476095	rs6197175	0.0061	0.000896	0.00561
rs13476095	rs6197961	0.00275	0.000397	0.00264
rs13476100	rs13479393	0.00155	0.000524	0.00162
rs13476100	rs13480766	0.00427	0.000965	0.00367
rs13476100	rs13480773	0.00129	0.00055	0.00119
rs13476100	rs13480793	0.00174	0.000327	0.00152
rs13476100	rs13480797	0.000817	0.000143	0.000674
rs13476100	rs3164088	0.00758	0.000615	0.00699
rs13476100	rs4228477	0.000897	0.000327	0.000805
rs13476100	rs6197175	0.00112	0.000194	0.000972
rs13476100	rs6197961	0.000817	0.000143	0.000674
rs13476100	rs6201222	0.000941	0.00035	0.000873
rs13476125	rs3663374	0.00269	0.000351	0.00255
rs13476136	rs13481090	0.00699	0.000945	0.00735
rs13476136	rs13481102	0.00467	0.000502	0.00495
rs13476136	rs6379880	0.00437	0.000442	0.0044
rs13476136	rs6381209	0.00288	0.000267	0.00286
rs13476136	rs6384104	0.00323	0.00037	0.00336
rs13476136	UT.11.75.985289	0.00318	0.000305	0.00333
rs13476207	rs3695386	0.000931	0.000438	0.000939
rs13476207	rs6377710	0.00152	0.000128	0.00155
rs13476211	rs6377710	0.00313	0.000141	0.00289
rs13476241	rs13483417	0.00113	0.000971	0.000927
rs13476248	rs6185197	0.00237	0.000836	0.00266
rs13476248	rs6308773	0.00309	0.000655	0.00288
rs13476248	rs6341891	0.00237	0.000836	0.00266
rs13476248	rs6358703	0.00283	0.000574	0.00268
rs13476258	rs3674721	0.00099	0.00443	0.000936
rs13476286	rs13477494	0.00553	0.000805	0.00482
rs13476286	rs13480630	0.00577	0.000825	0.00533
rs13476286	rs3023061	0.00121	0.000749	0.00115
rs13476308	rs13477178	0.000572	0.000348	0.000459
rs13476308	rs3659688	0.000956	0.00059	0.000907
rs13476308	rs3674810	0.000787	0.000486	0.000613
rs13476308	rs3715136	0.000956	0.00059	0.000907
rs13476308	rs3723953	0.000801	0.000602	0.00059
rs13476308	rs4137345	0.00157	0.000955	0.00151
rs13476312	rs13477178	0.00058	0.000415	0.000467
rs13476312	rs13477217	0.00224	0.000877	0.00228
rs13476312	rs3674810	0.000834	0.000585	0.000633
rs13476312	rs3723953	0.00185	0.000913	0.0012
rs13476339	rs3672342	0.00256	0.000876	0.00302
rs13476339	rs3721372	0.00712	0.000877	0.00721
rs13476343	rs3660367	0.00702	0.000403	0.00749
rs13476343	rs3721372	0.00327	0.00032	0.0032
rs13476343	rs4230908	0.00927	0.000767	0.00965
rs13476425	rs13479276	0.000286	4.56e-05	0.000312
rs13476425	rs13479325	0.000872	0.000361	0.0012
rs13476425	rs13481669	0.00141	0.000124	0.00155
rs13476425	rs13481689	0.00112	0.000158	0.00133
rs13476425	rs13481702	0.00348	0.000232	0.004
rs13476425	rs13481706	0.0125	0.000887	0.0137
rs13476425	rs13482711	0.000639	0.000141	0.000811
rs13476425	rs3675125	0.00273	0.000864	0.00223
rs13476425	rs3678616	0.0125	0.000887	0.0137
rs13476425	rs3679779	0.00421	0.000805	0.00535
rs13476425	rs3686663	0.00141	0.000124	0.00155
rs13476425	rs3688789	0.0128	0.00089	0.0109
rs13476425	rs3693478	0.00296	0.00061	0.00373
rs13476425	rs3695486	0.00142	0.000123	0.00156
rs13476425	rs3696018	0.000446	8.14e-05	0.000513
rs13476425	rs3717293	0.00064	8.98e-05	0.000722
rs13476425	rs3723790	0.00254	0.00072	0.00465
rs13476425	rs6178370	0.000573	5.21e-05	0.000649
rs13476425	rs6215262	0.00141	0.000124	0.00155
rs13476425	rs6239339	0.00186	0.000188	0.00208
rs13476425	rs6243819	0.00179	0.000158	0.00198
rs13476425	rs6250257	0.000251	0.000572	0.000374
rs13476425	rs6250327	0.00186	0.000188	0.00208
rs13476425	rs6287697	0.00421	0.000453	0.00425
rs13476425	rs6296859	0.00312	0.000853	0.00313
rs13476425	rs6298246	0.00141	0.000124	0.00155
rs13476425	rs6301008	0.00186	0.000188	0.00208
rs13476425	rs6318987	0.00264	0.000217	0.00286
rs13476425	rs6329684	0.00143	0.000139	0.00162
rs13476425	rs6343634	0.0018	0.000157	0.00198
rs13476425	rs6396465	0.00155	0.000155	0.00176
rs13476457	rs13481669	0.000864	2.24e-05	0.000873
rs13476457	rs13481689	0.00539	0.00024	0.00533
rs13476457	rs13481702	0.00381	8.61e-05	0.00432
rs13476457	rs13481706	0.0147	0.000265	0.0148
rs13476457	rs3678616	0.0147	0.000265	0.0148
rs13476457	rs3686663	0.000864	2.24e-05	0.000873
rs13476457	rs3695486	0.000871	2.24e-05	0.000875
rs13476457	rs6178370	0.00139	3.88e-05	0.00133
rs13476457	rs6215262	0.000864	2.24e-05	0.000873
rs13476457	rs6239339	0.00405	0.000143	0.00403
rs13476457	rs6243819	0.00203	5.67e-05	0.00203
rs13476457	rs6250327	0.00405	0.000143	0.00403
rs13476457	rs6298246	0.000864	2.24e-05	0.000873
rs13476457	rs6301008	0.00405	0.000143	0.00403
rs13476457	rs6318987	0.00171	4.28e-05	0.0017
rs13476457	rs6329684	0.00321	0.000106	0.00319
rs13476457	rs6343634	0.00205	5.66e-05	0.00205
rs13476457	rs6396465	0.00345	0.000118	0.00346
rs13476462	rs13481669	0.000846	2.29e-05	0.000874
rs13476462	rs13481689	0.00517	0.000232	0.00509
rs13476462	rs13481702	0.00364	8.3e-05	0.00412
rs13476462	rs13481706	0.0142	0.000256	0.0142
rs13476462	rs3678616	0.0142	0.000256	0.0142
rs13476462	rs3686663	0.000846	2.29e-05	0.000874
rs13476462	rs3695486	0.000854	2.28e-05	0.000876
rs13476462	rs6178370	0.0013	3.78e-05	0.00127
rs13476462	rs6215262	0.000846	2.29e-05	0.000874
rs13476462	rs6239339	0.00381	0.000138	0.00382
rs13476462	rs6243819	0.00191	5.49e-05	0.00193
rs13476462	rs6250327	0.00381	0.000138	0.00382
rs13476462	rs6298246	0.000846	2.29e-05	0.000874
rs13476462	rs6301008	0.00381	0.000138	0.00382
rs13476462	rs6318987	0.0016	4.15e-05	0.00162
rs13476462	rs6329684	0.00302	0.000104	0.00304
rs13476462	rs6343634	0.00193	5.48e-05	0.00194
rs13476462	rs6396465	0.00325	0.000115	0.00329
rs13476472	rs13479053	0.000977	0.00805	0.00134
rs13476472	rs13479058	0.000981	0.00576	0.00119
rs13476472	rs13479059	0.000981	0.00576	0.00119
rs13476472	rs13479064	0.000728	0.00517	0.00101
rs13476472	rs13481669	0.00622	0.000135	0.00561
rs13476472	rs13481689	0.00618	0.000291	0.00592
rs13476472	rs13481702	0.00506	0.000165	0.00547
rs13476472	rs13481706	0.0117	0.000301	0.0122
rs13476472	rs13481947	0.000452	0.000148	0.000517
rs13476472	rs13481958	0.000819	0.000271	0.000877
rs13476472	rs13481964	0.00125	0.000273	0.00119
rs13476472	rs3678616	0.0117	0.000301	0.0122
rs13476472	rs3686663	0.00622	0.000135	0.00561
rs13476472	rs3695486	0.00624	0.000135	0.0056
rs13476472	rs3697202	0.000452	0.000148	0.000517
rs13476472	rs3704502	0.000829	0.00548	0.00112
rs13476472	rs3711652	0.000934	0.00645	0.00123
rs13476472	rs3722157	0.000582	0.00489	0.000934
rs13476472	rs6178370	0.0119	0.000337	0.0103
rs13476472	rs6215262	0.00622	0.000135	0.00561
rs13476472	rs6239339	0.0183	0.000601	0.0169
rs13476472	rs6243819	0.0137	0.000375	0.0126
rs13476472	rs6250327	0.0183	0.000601	0.0169
rs13476472	rs6298246	0.00622	0.000135	0.00561
rs13476472	rs6301008	0.0183	0.000601	0.0169
rs13476472	rs6318987	0.0112	0.000275	0.0103
rs13476472	rs6329684	0.0143	0.000413	0.013
rs13476472	rs6343634	0.0137	0.000376	0.0126
rs13476472	rs6396465	0.0155	0.000469	0.0142
rs13476472	rs6410533	0.00163	0.00038	0.00182
rs13476473	rs13479053	0.000977	0.00805	0.00134
rs13476473	rs13479058	0.000981	0.00576	0.00119
rs13476473	rs13479059	0.000981	0.00576	0.00119
rs13476473	rs13479064	0.000728	0.00517	0.00101
rs13476473	rs13481669	0.00622	0.000135	0.00561
rs13476473	rs13481689	0.00618	0.000291	0.00592
rs13476473	rs13481702	0.00506	0.000165	0.00547
rs13476473	rs13481706	0.0117	0.000301	0.0122
rs13476473	rs13481947	0.000452	0.000148	0.000517
rs13476473	rs13481958	0.000819	0.000271	0.000877
rs13476473	rs13481964	0.00125	0.000273	0.00119
rs13476473	rs3678616	0.0117	0.000301	0.0122
rs13476473	rs3686663	0.00622	0.000135	0.00561
rs13476473	rs3695486	0.00624	0.000135	0.0056
rs13476473	rs3697202	0.000452	0.000148	0.000517
rs13476473	rs3704502	0.000829	0.00548	0.00112
rs13476473	rs3711652	0.000934	0.00645	0.00123
rs13476473	rs3722157	0.000582	0.00489	0.000934
rs13476473	rs6178370	0.0119	0.000337	0.0103
rs13476473	rs6215262	0.00622	0.000135	0.00561
rs13476473	rs6239339	0.0183	0.000601	0.0169
rs13476473	rs6243819	0.0137	0.000375	0.0126
rs13476473	rs6250327	0.0183	0.000601	0.0169
rs13476473	rs6298246	0.00622	0.000135	0.00561
rs13476473	rs6301008	0.0183	0.000601	0.0169
rs13476473	rs6318987	0.0112	0.000275	0.0103
rs13476473	rs6329684	0.0143	0.000413	0.013
rs13476473	rs6343634	0.0137	0.000376	0.0126
rs13476473	rs6396465	0.0155	0.000469	0.0142
rs13476473	rs6410533	0.00163	0.00038	0.00182
rs13476476	rs13477127	0.00099	0.00201	0.00111
rs13476476	rs13481669	0.00483	0.000115	0.00408
rs13476476	rs13481689	0.00677	0.00032	0.00595
rs13476476	rs13481702	0.0069	0.000263	0.00648
rs13476476	rs13481706	0.0209	0.000703	0.0198
rs13476476	rs13481947	0.00186	0.000448	0.00198
rs13476476	rs13481958	0.00318	0.000837	0.00319
rs13476476	rs3678616	0.0209	0.000703	0.0198
rs13476476	rs3686663	0.00483	0.000115	0.00408
rs13476476	rs3695486	0.00484	0.000115	0.00408
rs13476476	rs3697202	0.00186	0.000448	0.00198
rs13476476	rs6178370	0.0131	0.000395	0.0107
rs13476476	rs6215262	0.00483	0.000115	0.00408
rs13476476	rs6239339	0.0153	0.000544	0.0134
rs13476476	rs6243819	0.0113	0.000333	0.00969
rs13476476	rs6250257	0.00098	0.00489	0.0013
rs13476476	rs6250327	0.0153	0.000544	0.0134
rs13476476	rs6298246	0.00483	0.000115	0.00408
rs13476476	rs6301008	0.0153	0.000544	0.0134
rs13476476	rs6318987	0.00894	0.000239	0.00769
rs13476476	rs6329684	0.012	0.000377	0.0103
rs13476476	rs6343634	0.0112	0.000333	0.00969
rs13476476	rs6396465	0.013	0.000427	0.0113
rs13476563	rs13480318	0.00131	0.000574	0.00131
rs13476563	rs13481706	0.00646	0.000614	0.0067
rs13476563	rs13481947	0.00106	0.000159	0.000968
rs13476563	rs13481958	0.00298	0.000408	0.00244
rs13476563	rs13481964	0.00503	0.000613	0.00437
rs13476563	rs13481990	0.00097	0.000115	0.000882
rs13476563	rs13482000	0.000289	7.37e-05	0.000329
rs13476563	rs3678616	0.00646	0.000614	0.0067
rs13476563	rs3688959	0.000256	8.09e-06	0.000231
rs13476563	rs3697202	0.00106	0.000159	0.000968
rs13476563	rs6182207	0.00171	0.000647	0.0018
rs13476563	rs6288205	0.00405	0.000476	0.00359
rs13476563	rs6389588	0.000408	1.57e-05	0.000362
rs13476563	rs6410533	0.00321	0.000392	0.00269
rs13476598	rs13481990	0.00252	0.000992	0.0031
rs13476598	rs3688959	0.00271	0.000338	0.00307
rs13476598	rs6389588	0.00176	0.000263	0.00184
rs13476640	rs3688959	0.0108	0.000972	0.0101
rs13476647	rs13481990	0.0018	0.000164	0.00156
rs13476647	rs13482000	0.00374	0.000798	0.00383
rs13476647	rs3660367	0.0232	0.00099	0.0248
rs13476647	rs3688959	0.00206	0.000107	0.00189
rs13476647	rs4230908	0.0147	0.000477	0.0147
rs13476647	rs6389588	0.00336	0.000205	0.00288
rs13476660	rs13481990	0.00192	0.000151	0.00167
rs13476660	rs13482000	0.000855	0.00011	0.000926
rs13476660	rs13482691	0.00773	0.000679	0.00733
rs13476660	rs3660367	0.00957	0.000791	0.011
rs13476660	rs3688959	0.00148	6.92e-05	0.00135
rs13476660	rs4230908	0.00848	0.000977	0.00863
rs13476660	rs6389588	0.00387	0.000225	0.00323
rs13476667	rs13481990	0.00244	0.000165	0.00227
rs13476667	rs13482000	0.000345	4.28e-05	0.000389
rs13476667	rs13482691	0.00604	0.000377	0.00574
rs13476667	rs3660367	0.0097	0.000703	0.0108
rs13476667	rs3688959	0.000762	2.89e-05	0.000722
rs13476667	rs4198737	0.00106	0.000399	0.00118
rs13476667	rs4230908	0.00884	0.000838	0.00825
rs13476667	rs6389588	0.00213	0.000103	0.00187
rs13476723	rs4197725	0.000742	0.00152	0.000699
rs13476723	rs4198737	0.000838	0.00163	0.000633
rs13476746	rs13483378	0.00302	0.000654	0.00286
rs13476750	rs13483378	0.00368	0.000823	0.00343
rs13476811	rs13480454	0.00165	0.000455	0.00146
rs13476811	rs3669563	0.000509	0.000112	0.000498
rs13476811	rs6316481	0.00325	0.000514	0.0021
rs13476811	rs6320810	0.0022	0.000344	0.00224
rs13476846	rs13481220	0.00552	0.000788	0.00431
rs13476846	rs13481228	0.00215	0.000413	0.00167
rs13476846	rs3683086	0.00232	0.000269	0.00173
rs13476860	rs13477307	0.00248	0.000424	0.00191
rs13476860	rs13477309	0.00242	0.00038	0.00219
rs13476860	rs13477313	0.0034	0.00052	0.00303
rs13476860	rs13481571	0.00592	0.000802	0.00701
rs13476860	rs3684333	0.00308	0.000464	0.00268
rs13476860	rs6263380	0.00918	0.000694	0.00867
rs13476925	rs13477541	0.00548	0.000669	0.007
rs13476925	rs13477550	0.0039	0.000411	0.00528
rs13476936	rs13477541	0.00447	0.000579	0.0048
rs13476936	rs13477550	0.00782	0.000951	0.00824
rs13476936	rs13477569	0.00212	0.000747	0.00224
rs13476936	rs3690160	0.00152	0.000367	0.00119
rs13476944	rs4152386	0.000783	0.000414	0.000654
rs13476944	rs4152838	0.000468	0.000235	0.000368
rs13476950	rs13479784	0.00328	0.000786	0.00301
rs13476950	rs3672639	0.00293	0.000598	0.00265
rs13476950	rs3675125	0.00773	0.00077	0.00656
rs13476950	rs6398181	0.00321	0.000676	0.00291
rs13476954	rs13479784	0.00328	0.000786	0.00301
rs13476954	rs3672639	0.00293	0.000598	0.00265
rs13476954	rs3675125	0.00773	0.00077	0.00656
rs13476954	rs6398181	0.00321	0.000676	0.00291
rs13476958	rs13479784	0.00332	0.000767	0.00298
rs13476958	rs3672639	0.00296	0.000583	0.00262
rs13476958	rs6398181	0.00325	0.000659	0.00288
rs13476964	rs13479784	0.00277	0.000633	0.00246
rs13476964	rs3672639	0.00246	0.000479	0.00216
rs13476964	rs3720634	0.00404	0.000966	0.00334
rs13476964	rs6398181	0.0027	0.000542	0.00237
rs13476970	rs3672639	0.00485	0.000987	0.00413
rs13476974	rs3672639	0.00388	0.000827	0.00364
rs13476974	rs3675125	0.0198	0.000907	0.0153
rs13476974	rs6398181	0.00424	0.000928	0.00398
rs13476992	rs3660290	0.0197	0.000754	0.017
rs13476992	rs3692040	0.0198	0.000763	0.017
rs13476992	rs3722447	0.00123	0.000472	0.000637
rs13476992	rs6165881	0.0264	0.000796	0.0225
rs13477066	rs3718262	0.00278	0.000639	0.00279
rs13477066	rs4139735	0.00277	0.000648	0.0028
rs13477123	rs13479053	0.00257	0.000949	0.003
rs13477123	rs13479055	0.00202	0.000684	0.00243
rs13477123	rs13479084	0.00258	0.000797	0.00308
rs13477123	rs13480351	0.00261	0.000282	0.00254
rs13477123	rs13480367	0.00515	0.000182	0.00441
rs13477123	rs13480387	0.00652	0.00082	0.00813
rs13477123	rs3657346	0.00899	0.00046	0.00976
rs13477123	rs3671932	0.00202	0.000684	0.00243
rs13477123	rs3690580	0.00498	0.000203	0.00473
rs13477123	rs4226359	0.00158	0.000719	0.002
rs13477123	rs6152631	0.00122	0.00054	0.00129
rs13477123	rs6190068	0.0078	0.000295	0.00798
rs13477123	rs6386657	0.00122	0.00054	0.00129
rs13477123	rs6391555	0.00158	0.000719	0.002
rs13477127	rs13479084	0.00376	0.000656	0.00436
rs13477127	rs13479086	0.00432	0.000794	0.00439
rs13477127	rs13480367	0.0139	0.000828	0.0108
rs13477127	rs3680197	0.000972	0.00191	0.00128
rs13477127	rs3690580	0.0122	0.00085	0.0105
rs13477127	rs6152631	0.0019	0.000457	0.00204
rs13477127	rs6190068	0.0146	0.000765	0.0131
rs13477127	rs6386657	0.0019	0.000457	0.00204
rs13477127	rs6387265	0.00439	0.000939	0.00431
rs13477144	rs13477276	0.0163	0.000495	0.0147
rs13477144	rs13480367	0.0146	0.000993	0.0124
rs13477144	rs3657346	0.00752	0.000803	0.00755
rs13477144	rs3690580	0.0116	0.000977	0.0105
rs13477144	rs3695865	0.00257	0.000806	0.00225
rs13477144	rs6180460	0.00483	0.000947	0.00472
rs13477144	rs6190068	0.00965	0.00083	0.00912
rs13477154	rs13477276	0.011	0.00049	0.0102
rs13477154	rs3657346	0.00751	0.000879	0.00759
rs13477154	rs6190068	0.0097	0.000953	0.00935
rs13477178	rs13477276	0.0104	0.00063	0.00948
rs13477178	rs13477355	0.00574	0.000477	0.005
rs13477178	rs13493060	0.00067	0.000415	0.000518
rs13477217	rs13477355	0.00106	4.72e-05	0.000976
rs13477217	rs3707642	0.00208	0.000399	0.00209
rs13477217	rs4137502	0.0042	0.000825	0.00419
rs13477230	rs13477355	0.00393	0.000142	0.00327
rs13477230	rs13481308	0.00316	0.000727	0.00277
rs13477230	rs3162061	0.0195	0.000642	0.0149
rs13477230	rs3660104	0.000362	0.000341	0.000358
rs13477230	rs3718992	0.00254	0.00058	0.0022
rs13477230	rs6209157	0.00247	0.000577	0.00217
rs13477230	rs6334600	0.000504	0.00048	0.000473
rs13477230	rs8259443	0.000465	0.000519	0.000526
rs13477230	UT.3.102.173433	0.0199	0.000631	0.0154
rs13477242	rs13481308	0.00182	0.000442	0.0018
rs13477242	rs3660104	0.00133	0.000811	0.00131
rs13477242	rs3718992	0.00215	0.000448	0.00207
rs13477242	rs6209157	0.0021	0.000445	0.00203
rs13477242	rs6334600	0.00133	0.000803	0.0012
rs13477242	rs8259443	0.00118	0.000867	0.00131
rs13477254	rs13480198	0.00082	0.00028	0.000721
rs13477254	rs13481308	0.00116	0.000333	0.00112
rs13477254	rs3660104	0.0003	0.000184	0.00027
rs13477254	rs3718992	0.0021	0.000742	0.00198
rs13477254	rs6209157	0.00186	0.000673	0.00178
rs13477254	rs6334600	0.000278	0.000162	0.000236
rs13477254	rs8259443	0.000258	0.000177	0.000237
rs13477261	rs13480130	0.00109	0.000734	0.0012
rs13477261	rs13480194	0.00309	0.000772	0.003
rs13477261	rs13480198	0.000823	0.000157	0.000744
rs13477261	rs13481308	0.000116	5.08e-05	0.000111
rs13477261	rs3660104	0.000311	0.000146	0.000336
rs13477261	rs3711756	0.00203	0.000952	0.00208
rs13477261	rs3718992	0.000235	0.000112	0.000226
rs13477261	rs6209157	0.0002	9.99e-05	0.000197
rs13477261	rs6334600	0.000565	0.000223	0.000545
rs13477261	rs6403731	0.000267	0.000112	0.000244
rs13477261	rs8259443	0.000226	9.33e-05	0.000228
rs13477276	rs3659866	0.00743	0.000262	0.00597
rs13477276	rs3674810	0.00648	0.000272	0.00568
rs13477276	rs6176848	0.0128	0.000391	0.0113
rs13477279	rs3659866	0.00842	0.000449	0.00728
rs13477279	rs4198737	0.0035	0.000829	0.00305
rs13477307	rs13482254	0.000931	0.0016	0.00112
rs13477307	rs13482256	0.000931	0.0016	0.00112
rs13477307	rs13483541	0.00107	0.000212	0.000811
rs13477307	rs3659866	0.0107	0.000479	0.0107
rs13477307	rs3701623	0.000192	0.000387	0.00027
rs13477307	UT.2.158.095429	0.00251	0.000504	0.00196
rs13477309	rs3659866	0.0163	0.000678	0.0145
rs13477309	rs3701623	0.000237	0.000522	0.000342
rs13477309	UT.2.158.095429	0.00252	0.000467	0.00231
rs13477313	rs3659866	0.0114	0.000342	0.00883
rs13477313	rs3701623	0.000284	0.000717	0.000436
rs13477313	UT.2.158.095429	0.00348	0.000638	0.00318
rs13477355	rs3659688	0.00203	0.000136	0.00206
rs13477355	rs3659866	0.000209	3.8e-06	0.000194
rs13477355	rs3674810	0.00729	0.00042	0.00585
rs13477355	rs3685286	0.00132	4.1e-05	0.00117
rs13477355	rs3708227	0.0057	0.000221	0.00477
rs13477355	rs3715136	0.00203	0.000136	0.00206
rs13477355	rs3726567	0.000676	2.78e-05	0.000642
rs13477355	rs4137345	0.00209	0.000138	0.00208
rs13477355	rs6291559	0.00048	0.000178	0.000427
rs13477364	rs6363066	0.0025	0.000595	0.00226
rs13477379	rs6223000	0.000647	0.000778	0.000736
rs13477391	rs13483382	0.00119	0.000878	0.00096
rs13477391	rs13483390	0.00116	0.000958	0.000986
rs13477400	rs13483390	0.00113	0.00043	0.000668
rs13477400	rs13483394	0.000203	9.87e-05	0.000146
rs13477400	rs13483398	0.000264	0.000163	0.000195
rs13477410	rs13481592	0.00322	0.000727	0.00387
rs13477410	rs13483390	0.00188	0.000703	0.00165
rs13477410	rs13483394	0.000818	0.000256	0.000672
rs13477410	rs13483398	0.000983	0.000389	0.000818
rs13477410	rs6207869	0.00326	0.000742	0.00389
rs13477421	rs4165119	0.000761	0.00192	0.000861
rs13477438	rs13482558	0.0174	0.000786	0.0146
rs13477438	rs13483601	0.00257	0.0007	0.00278
rs13477438	rs13483606	0.00032	0.000103	0.000279
rs13477438	rs3678662	0.00241	0.000978	0.00218
rs13477438	rs4138760	0.0176	0.0008	0.0148
rs13477438	rs6308228	0.00204	0.000905	0.00197
rs13477448	rs13483599	0.00171	0.000315	0.00175
rs13477448	rs13483601	0.00115	0.000215	0.00116
rs13477448	rs13483606	0.000107	2.88e-05	9.22e-05
rs13477477	rs13483144	0.00259	8.99e-05	0.00244
rs13477477	rs3723150	0.0056	0.00046	0.00519
rs13477488	rs13480112	0.00876	0.000401	0.00722
rs13477488	rs13483144	0.0129	0.000835	0.0115
rs13477488	rs13483159	0.00719	0.000617	0.00529
rs13477488	rs3723150	0.00197	0.000143	0.00157
rs13477488	rs6182405	0.00476	0.000331	0.00409
rs13477494	rs13477694	0.000573	0.00103	0.000563
rs13477494	rs13480112	0.0128	0.000594	0.0115
rs13477494	rs13481127	0.000438	0.000676	0.000556
rs13477494	rs3694793	0.00518	0.000684	0.0045
rs13477494	rs6182405	0.00147	8.38e-05	0.00127
rs13477529	rs13483144	0.00365	0.00013	0.00339
rs13477529	rs3723150	0.00861	0.000585	0.00758
rs13477529	rs6221589	0.000755	0.000276	0.000849
rs13477541	rs13479058	0.000495	0.00109	0.000521
rs13477541	rs13479059	0.000495	0.00109	0.000521
rs13477541	rs13481636	0.00146	0.000107	0.00108
rs13477541	rs8238755	0.00395	0.000286	0.00419
rs13477546	rs13479058	0.000588	0.000868	0.000569
rs13477546	rs13479059	0.000588	0.000868	0.000569
rs13477546	rs13481636	0.00324	0.000187	0.00264
rs13477546	rs13481702	0.000977	0.000925	0.00122
rs13477546	rs13481706	0.000961	0.000522	0.00124
rs13477546	rs13482269	0.00109	0.00147	0.000951
rs13477546	rs13482272	0.00116	0.00149	0.00098
rs13477546	rs13482290	0.000367	0.000366	0.000307
rs13477546	rs13482296	0.00037	0.000367	0.00031
rs13477546	rs3023061	0.000204	0.000296	0.000243
rs13477546	rs3663148	0.000359	0.000354	0.000295
rs13477546	rs3667933	0.00104	0.000903	0.00081
rs13477546	rs3678616	0.000961	0.000522	0.00124
rs13477546	rs4225575	0.000608	0.000693	0.000648
rs13477546	rs6352085	0.00119	0.00172	0.000995
rs13477546	rs6407863	0.00108	0.000918	0.000848
rs13477546	rs8238755	0.00926	0.000708	0.00954
rs13477550	rs13481636	0.0107	0.000853	0.00818
rs13477550	rs13481706	0.00156	0.00086	0.00202
rs13477550	rs13482269	0.000854	0.00123	0.000784
rs13477550	rs13482290	0.000443	0.000482	0.000388
rs13477550	rs13482296	0.000448	0.000484	0.000393
rs13477550	rs3023061	0.000721	0.00152	0.000864
rs13477550	rs3663148	0.000431	0.000463	0.000368
rs13477550	rs3667933	0.000651	0.000455	0.000507
rs13477550	rs3678616	0.00156	0.00086	0.00202
rs13477550	rs3718262	0.00122	0.000738	0.000779
rs13477550	rs4139735	0.000984	0.000623	0.000632
rs13477550	rs6352085	0.000929	0.00142	0.000816
rs13477550	rs6407863	0.000675	0.000463	0.000536
rs13477550	rs8238755	0.00383	0.000256	0.00432
rs13477569	rs13481023	0.000931	0.00279	0.000917
rs13477569	rs6393330	0.000121	0.000486	0.000157
rs13477576	rs13481023	0.000805	0.00164	0.000642
rs13477576	rs3687032	0.000673	0.00127	0.000824
rs13477576	rs6335879	0.0007	0.00101	0.000862
rs13477576	rs6393330	5.03e-05	0.000375	6.87e-05
rs13477595	rs6393330	0.000545	0.00186	0.000749
rs13477621	rs3702894	0.000884	0.00128	0.000873
rs13477621	rs6176332	0.000206	0.000167	0.000184
rs13477621	rs6216320	0.000123	0.000113	0.000118
rs13477623	rs13480510	0.000733	0.000391	0.000654
rs13477623	rs13480531	0.00128	0.000802	0.00126
rs13477625	rs13480510	0.000663	0.000338	0.000607
rs13477625	rs13480531	0.0012	0.000699	0.00119
rs13477649	rs13483382	0.00382	0.00036	0.00351
rs13477649	rs13483390	0.00476	0.0006	0.00295
rs13477649	rs13483394	0.00413	0.000817	0.0026
rs13477649	rs3705890	0.00321	0.000908	0.00314
rs13477649	rs3711945	0.00249	0.000666	0.00223
rs13477659	rs3705890	0.00272	0.000912	0.0026
rs13477659	rs4198737	0.000519	0.0006	0.000696
rs13477678	rs4198737	0.00138	0.000944	0.00151
rs13477678	rs4202372	0.000443	0.00069	0.000625
rs13477694	rs4198737	3.88e-05	2.68e-05	4.95e-05
rs13477694	rs4202372	0.00088	0.000988	0.00127
rs13477738	rs3658150	0.00111	0.000515	0.00154
rs13477738	rs3662055	0.00104	0.000453	0.0014
rs13477738	rs6221589	0.00021	0.000127	0.000204
rs13477738	rs6257272	0.00117	0.000286	0.00156
rs13477738	rs6409508	0.00076	0.000781	0.000896
rs13477741	rs3658150	0.00111	0.000515	0.00154
rs13477741	rs3662055	0.00104	0.000453	0.0014
rs13477741	rs6221589	0.00021	0.000127	0.000204
rs13477741	rs6257272	0.00117	0.000286	0.00156
rs13477741	rs6409508	0.00076	0.000781	0.000896
rs13477769	rs3711950	0.000428	0.00128	0.000373
rs13477769	rs6221589	0.00016	0.00015	0.000148
rs13477769	rs6409508	0.000684	0.000525	0.000607
rs13477773	rs3711950	0.000428	0.00128	0.000373
rs13477773	rs6221589	0.00016	0.00015	0.000148
rs13477773	rs6409508	0.000684	0.000525	0.000607
rs13477893	rs13483356	0.0015	0.000823	0.00168
rs13477952	rs13481561	0.00395	0.000483	0.00429
rs13477952	rs3654718	0.00195	0.00021	0.00202
rs13477952	rs3684754	0.000956	0.00155	0.00102
rs13477952	rs6263380	0.00385	0.000686	0.00411
rs13477968	rs13481561	0.00117	7.65e-05	0.00101
rs13477968	rs3654718	0.00149	0.000181	0.00122
rs13477968	rs6263380	0.00142	0.000189	0.0013
rs13477991	rs13480687	0.00735	0.000448	0.00694
rs13478051	rs3660367	0.00511	0.000408	0.005
rs13478051	rs4230908	0.00705	0.000519	0.00626
rs13478051	rs4230930	0.00362	0.000273	0.00336
rs13478051	rs6287472	0.00473	0.000539	0.00448
rs13478051	rs6288205	0.00889	0.000566	0.00777
rs13478051	rs6410533	0.00359	0.00023	0.00319
rs13478093	rs13480454	0.00075	0.00148	0.00088
rs13478093	rs3669563	0.000924	0.00251	0.0014
rs13478093	rs6299531	0.00114	0.000766	0.00155
rs13478093	rs6316481	9.57e-05	0.000195	7.42e-05
rs13478093	rs6320810	0.000421	0.000855	0.000368
rs13478104	rs13480454	0.000159	0.000149	0.000166
rs13478104	rs3669563	0.00046	0.000796	0.000574
rs13478104	rs6299531	0.00015	3.63e-05	0.000202
rs13478104	rs6316481	3.73e-05	2.73e-05	2.29e-05
rs13478104	rs6320810	0.000925	0.00131	0.000694
rs13478133	rs13480454	0.000222	2.95e-05	0.000224
rs13478133	rs13482536	0.003	0.000616	0.00297
rs13478133	rs13482541	0.00223	0.000317	0.00214
rs13478133	rs3669563	0.00224	0.00026	0.00271
rs13478133	rs3677296	0.00481	0.0006	0.0049
rs13478133	rs4225096	0.00207	0.000977	0.00172
rs13478133	rs6299531	2.41e-05	2.79e-06	3.99e-05
rs13478133	rs6316481	0.00221	0.000358	0.00234
rs13478133	rs8241505	1.66e-05	6.86e-07	2.32e-05
rs13478148	rs13482536	0.000244	0.00011	0.000268
rs13478148	rs13482541	0.000263	8.43e-05	0.000276
rs13478148	rs13483144	0.00056	0.000246	0.00057
rs13478148	rs13483417	0.00902	0.000139	0.00815
rs13478148	rs3677296	0.000191	5.23e-05	0.000229
rs13478148	rs3695416	0.000226	6.07e-05	0.000273
rs13478148	rs3713848	0.00762	0.000841	0.00736
rs13478148	rs3716803	0.021	0.000693	0.0214
rs13478148	rs8241505	0.00273	0.000495	0.00334
rs13478175	rs13479624	8.01e-05	0.000289	9.46e-05
rs13478175	rs13479628	0.000444	0.000478	0.000393
rs13478175	rs13480703	0.00452	0.000722	0.00508
rs13478175	rs13481823	0.00371	0.000715	0.0034
rs13478175	rs13482536	0.000998	5.29e-05	0.000916
rs13478175	rs13482541	0.000957	3.98e-05	0.000878
rs13478175	rs13482580	0.00333	0.000134	0.00296
rs13478175	rs13482589	0.0066	0.000748	0.00559
rs13478175	rs13483144	0.000122	5.18e-05	0.000142
rs13478175	rs3089995	0.00326	0.000414	0.00306
rs13478175	rs3091174	0.00425	0.000861	0.00419
rs13478175	rs3660290	0.00408	0.000316	0.00373
rs13478175	rs3677296	0.000923	5.42e-05	0.000918
rs13478175	rs3692040	0.00405	0.00031	0.0037
rs13478175	rs3695416	0.000843	4.75e-05	0.000828
rs13478175	rs3701829	0.00355	0.000367	0.00403
rs13478175	rs3710094	0.00911	0.000763	0.00865
rs13478175	rs3721372	0.00133	7.51e-05	0.00121
rs13478175	rs4138760	0.00763	0.000986	0.00645
rs13478175	rs4230908	0.00551	0.000695	0.00582
rs13478175	rs6165881	0.00297	0.000219	0.00274
rs13478175	rs6188239	0.00383	0.000565	0.00362
rs13478175	rs6287472	0.000748	0.00102	0.000991
rs13478175	rs6345126	0.00977	0.000956	0.00882
rs13478175	rs6360325	0.011	0.000711	0.0107
rs13478175	rs6410533	0.000483	0.000499	0.000608
rs13478184	rs13479624	8.97e-05	0.000316	0.000109
rs13478184	rs13479628	0.00034	0.000472	0.000325
rs13478184	rs13480703	0.00287	0.000321	0.00299
rs13478184	rs13480773	0.0231	0.000612	0.0206
rs13478184	rs13481823	0.00174	0.000282	0.00171
rs13478184	rs13482536	0.0019	0.000113	0.00177
rs13478184	rs13482541	0.00183	8.53e-05	0.0017
rs13478184	rs13482580	0.011	0.000559	0.0096
rs13478184	rs13483144	0.000164	8.01e-05	0.000185
rs13478184	rs3089995	0.00178	0.000195	0.00164
rs13478184	rs3091174	0.00306	0.000699	0.0032
rs13478184	rs3677296	0.00122	7.26e-05	0.00119
rs13478184	rs3695416	0.000968	5.82e-05	0.000954
rs13478184	rs3701829	0.00268	0.000193	0.00282
rs13478184	rs3720797	0.00441	0.00052	0.00397
rs13478184	rs3721372	0.00187	0.000105	0.00173
rs13478184	rs4228477	0.0288	0.00091	0.0257
rs13478184	rs4230908	0.00594	0.000691	0.00642
rs13478184	rs6165881	0.00976	0.000849	0.0088
rs13478184	rs6188239	0.00271	0.000448	0.00272
rs13478184	rs6201222	0.0231	0.00069	0.0207
rs13478184	rs6287472	0.000827	0.000994	0.00117
rs13478184	rs6410533	0.000547	0.000499	0.000734
rs13478184	rs8273881	0.00399	0.000635	0.0039
rs13478204	rs13479624	0.00029	0.000876	0.000371
rs13478204	rs13479628	0.00076	0.000921	0.000755
rs13478204	rs13480703	0.00209	0.000779	0.00238
rs13478204	rs13481823	0.00377	0.000638	0.00316
rs13478204	rs3089995	0.00617	0.000929	0.00576
rs13478204	rs3677296	0.00181	0.00019	0.00203
rs13478204	rs3695416	0.00159	0.00018	0.00182
rs13478204	rs3701829	0.0029	0.000687	0.00346
rs13478204	rs6287472	0.000197	0.00026	0.000311
rs13478204	rs6288205	0.000503	0.000559	0.00073
rs13478204	rs6410533	0.000198	0.00019	0.000283
rs13478217	rs13479624	0.000135	0.000115	0.00015
rs13478217	rs13479628	0.00037	0.000206	0.000377
rs13478217	rs13480703	0.000727	0.000537	0.000863
rs13478217	rs13482558	0.0036	0.000178	0.00314
rs13478217	rs13482580	0.00404	0.000339	0.00377
rs13478217	rs13482691	0.00667	0.000733	0.00659
rs13478217	rs3089995	0.00182	0.000803	0.00193
rs13478217	rs3660290	0.0042	0.000299	0.00381
rs13478217	rs3660367	0.00317	0.000146	0.00309
rs13478217	rs3692040	0.00419	0.000293	0.00381
rs13478217	rs3695416	0.00348	0.000866	0.0039
rs13478217	rs3701829	0.000898	0.000408	0.00116
rs13478217	rs3721372	0.00648	0.00065	0.00673
rs13478217	rs4138760	0.00357	0.000174	0.00309
rs13478217	rs4230908	0.000368	1.42e-05	0.00034
rs13478217	rs4230930	0.00329	0.000212	0.00311
rs13478217	rs6165881	0.00254	0.000161	0.00232
rs13478217	rs6287472	1.5e-05	4.59e-06	1.76e-05
rs13478217	rs6288205	2.56e-05	4.77e-06	2.81e-05
rs13478217	rs6410533	1.54e-05	3.3e-06	1.72e-05
rs13478223	rs13479624	0.000987	0.000673	0.00107
rs13478223	rs13479628	0.0014	0.000968	0.00137
rs13478223	rs13479799	0.0077	0.000562	0.00471
rs13478223	rs13479811	0.0105	0.000792	0.00752
rs13478223	rs13482558	0.0129	0.000354	0.01
rs13478223	rs13482580	0.00533	0.000227	0.00464
rs13478223	rs13482589	0.0124	0.000765	0.0112
rs13478223	rs3660290	0.00502	0.000168	0.00423
rs13478223	rs3692040	0.005	0.000165	0.00421
rs13478223	rs3694940	0.00944	0.000582	0.0055
rs13478223	rs4138760	0.0117	0.000307	0.009
rs13478223	rs4230908	0.00247	0.000201	0.00261
rs13478223	rs6165881	0.00348	0.000109	0.00294
rs13478223	rs6287472	8.78e-05	2.13e-05	0.000105
rs13478223	rs6288205	0.000135	2.04e-05	0.000155
rs13478223	rs6410533	0.00012	1.72e-05	0.000134
rs13478383	rs6223000	0.000648	0.0011	0.000737
rs13478392	rs3701338	0.00181	0.000757	0.002
rs13478400	rs3688789	0.00698	0.000679	0.00808
rs13478400	rs3701338	0.00153	0.000609	0.00171
rs13478501	rs3687889	0.000618	0.00116	0.000714
rs13478539	rs13483144	0.00391	0.000737	0.00378
rs13478539	rs3709285	0.00354	0.000256	0.00364
rs13478540	rs3709285	0.00407	0.000474	0.00396
rs13478595	rs3670382	0.00301	0.000669	0.00268
rs13478667	rs13483599	0.0153	0.000698	0.0129
rs13478667	rs13483601	0.0098	0.000539	0.00859
rs13478676	rs8241505	0.00295	0.000485	0.00376
rs13478681	rs8241505	0.0023	0.000368	0.00287
rs13478693	rs8241505	0.003	0.000425	0.00357
rs13478717	rs3658023	0.000917	0.000403	0.000988
rs13478717	rs3681694	0.000399	0.000207	0.000433
rs13478717	rs3701250	0.000495	0.000652	0.000503
rs13478717	rs6208879	0.000702	0.00035	0.000767
rs13478719	rs13482191	0.00842	0.000863	0.00796
rs13478719	rs3140262	0.00855	0.00087	0.00782
rs13478719	rs3680568	0.00863	0.000875	0.00787
rs13478818	UT.7.90.803899	0.00045	0.000479	0.00056
rs13478882	rs6220079	0.0297	0.000977	0.0283
rs13478952	rs8236684	0.00374	0.000882	0.00344
rs13478999	rs8236684	0.000379	1.32e-05	0.00033
rs13479070	rs6400804	0.000716	0.000407	0.000653
rs13479071	rs6400804	0.000716	0.000407	0.000653
rs13479099	rs13481789	0.000664	0.00141	0.000719
rs13479099	rs3688207	0.000669	0.00113	0.000658
rs13479099	rs6200652	0.00102	0.00064	0.00102
rs13479154	rs13479860	0.000679	0.00131	0.000695
rs13479154	rs13480510	0.00321	0.000982	0.00429
rs13479154	rs3696786	0.000462	0.000843	0.000446
rs13479276	rs13479624	0.00633	0.000852	0.0049
rs13479276	rs13482191	0.00161	0.000693	0.00212
rs13479276	rs13482595	0.00304	0.000422	0.00281
rs13479276	rs3140262	0.00159	0.000678	0.00206
rs13479276	rs3658458	0.00393	0.000577	0.00326
rs13479276	rs3680568	0.00162	0.000669	0.00211
rs13479276	rs3698093	0.00322	0.000327	0.00269
rs13479276	rs8244195	0.00239	0.00053	0.00238
rs13479325	rs13482206	0.000839	0.000173	0.000675
rs13479325	rs13482276	0.00511	0.000969	0.00313
rs13479325	rs13482281	0.00253	0.000401	0.00146
rs13479342	rs13482206	0.000268	0.000175	0.000202
rs13479342	rs8244195	0.00111	0.000881	0.00107
rs13479347	rs13482206	0.00172	0.000908	0.00127
rs13479347	rs6313371	0.000999	0.00182	0.000888
rs13479351	rs13482206	0.00172	0.000908	0.00127
rs13479351	rs6313371	0.000999	0.00182	0.000888
rs13479393	rs3691374	0.00155	0.000524	0.00162
rs13479507	rs3721372	0.00688	0.000908	0.00669
rs13479507	rs4211515	0.00114	0.000456	0.00156
rs13479507	rs4212102	0.00535	0.000483	0.00504
rs13479601	rs13480601	0.00101	8.05e-05	0.00121
rs13479601	rs3676667	0.00115	0.000138	0.00132
rs13479601	rs3708975	0.00108	0.000585	0.00121
rs13479601	rs3715820	0.00108	0.000111	0.00118
rs13479601	rs4224277	0.00486	0.000828	0.00454
rs13479601	rs6164020	0.00178	0.000165	0.00191
rs13479601	rs6186864	0.00325	0.000296	0.00338
rs13479601	rs6212358	0.000866	0.00011	0.00115
rs13479601	rs6243167	0.00246	0.000165	0.00266
rs13479601	rs6247544	0.000995	0.000148	0.000947
rs13479601	rs6312070	0.00232	0.000427	0.00166
rs13479624	rs3696018	0.00424	0.000485	0.00315
rs13479624	rs3718492	0.000276	0.00101	0.000311
rs13479628	rs13480601	0.0129	0.000591	0.00975
rs13479628	rs3670118	0.00163	0.000676	0.00158
rs13479628	rs3718492	0.00116	0.00131	0.000993
rs13479628	rs6247544	0.00123	0.00079	0.00124
rs13479628	rs6256918	0.00154	0.000643	0.00148
rs13479769	rs13482254	0.00355	0.000205	0.00381
rs13479769	rs13482256	0.00355	0.000205	0.00381
rs13479769	rs13482262	0.00899	0.000886	0.0099
rs13479769	rs13482269	0.00906	0.000735	0.00958
rs13479769	rs13482272	0.00752	0.000589	0.00797
rs13479769	rs13482276	0.0127	0.000778	0.013
rs13479769	rs13482281	0.00915	0.00047	0.00935
rs13479769	rs3698093	0.00188	0.000694	0.000909
rs13479769	rs3701623	0.00234	0.000107	0.00274
rs13479769	rs6296891	0.000539	0.000624	0.000439
rs13479769	rs6352085	0.00902	0.000754	0.00967
rs13479769	rs8244195	0.00116	0.000238	0.0011
rs13479776	rs13482254	0.00954	0.000696	0.00882
rs13479776	rs13482256	0.00954	0.000696	0.00882
rs13479776	rs13482269	0.00893	0.000744	0.00866
rs13479776	rs13482272	0.00672	0.000538	0.0065
rs13479776	rs13482276	0.0104	0.000662	0.0101
rs13479776	rs13482281	0.00951	0.000675	0.00945
rs13479776	rs3701623	0.00695	0.000464	0.00723
rs13479776	rs6352085	0.00755	0.000533	0.00726
rs13479784	rs13482254	0.00131	0.000101	0.00128
rs13479784	rs13482256	0.00131	0.000101	0.00128
rs13479784	rs13482262	0.00321	0.000405	0.00321
rs13479784	rs13482269	0.00449	0.000538	0.00454
rs13479784	rs13482272	0.00345	0.000409	0.00353
rs13479784	rs13482281	0.00885	0.000933	0.00877
rs13479784	rs3668064	0.00244	0.000375	0.00213
rs13479784	rs3701623	0.000698	5e-05	0.000716
rs13479784	rs6274760	0.00332	0.000758	0.00295
rs13479784	rs6352085	0.00393	0.000454	0.00397
rs13479799	rs4180126	0.0059	0.000717	0.00588
rs13479799	rs4185176	0.00856	0.000642	0.0091
rs13479799	rs4185639	0.0112	0.000955	0.0122
rs13479811	rs4179117	0.00648	0.000591	0.00599
rs13479811	rs4179233	0.00647	0.000588	0.00597
rs13479811	rs4180126	0.00291	0.000178	0.00271
rs13479811	rs4185176	0.0024	8.35e-05	0.00259
rs13479811	rs4185639	0.00329	0.000132	0.00359
rs13479811	rs6243167	0.00539	0.000448	0.00415
rs13479814	rs6243167	0.00219	0.000169	0.00151
rs13479814	rs6335027	0.0108	0.000654	0.00732
rs13480112	rs3695386	0.0198	0.000991	0.017
rs13480112	rs3722447	0.0128	0.000396	0.0106
rs13480138	rs13483075	0.00269	0.000954	0.00221
rs13480153	rs13483075	0.000468	7.16e-05	0.000371
rs13480153	rs13483110	0.00461	0.000736	0.00458
rs13480166	rs13483075	0.000131	5.23e-05	0.000131
rs13480166	rs13483078	0.00199	0.000671	0.0019
rs13480172	rs13483075	4.64e-05	2.7e-05	4.4e-05
rs13480172	rs13483078	0.000787	0.000343	0.000731
rs13480180	rs13483075	9e-05	7.23e-05	0.000122
rs13480180	rs13483078	0.00102	0.00075	0.00135
rs13480191	rs13483075	0.000292	0.000136	0.000334
rs13480194	rs13483075	0.0013	0.000307	0.00111
rs13480194	UT.2.93.461287	0.00236	0.000893	0.00246
rs13480198	UT.2.93.461287	0.000706	0.000214	0.000673
rs13480218	rs3660104	0.000734	0.0182	0.0033
rs13480218	rs6154433	0.000385	0.00138	0.000438
rs13480218	rs6334600	0.0005	0.0129	0.00227
rs13480227	rs3670195	0.00205	0.000983	0.00243
rs13480236	rs13483417	0.00206	0.000709	0.00384
rs13480236	rs3716803	0.00242	0.000799	0.00474
rs13480236	rs6182207	0.00194	0.000812	0.00238
rs13480273	rs13482741	0.000505	0.0015	0.000848
rs13480288	rs13483423	0.00336	0.000507	0.0032
rs13480288	rs3675825	0.00554	0.000835	0.00492
rs13480288	rs3696018	0.0034	0.000987	0.00302
rs13480288	rs3705890	0.0107	0.000807	0.00952
rs13480312	rs6295014	0.000265	0.000175	0.000307
rs13480315	rs6295014	0.000267	0.000174	0.000305
rs13480318	rs3661495	0.00299	0.000715	0.00277
rs13480318	rs6295014	0.000105	5.47e-05	0.000112
rs13480351	rs13480703	0.00619	0.000231	0.00484
rs13480351	rs13480712	0.00103	0.000202	0.00115
rs13480351	rs13483423	0.0058	0.00088	0.007
rs13480351	rs3661495	0.000201	2.94e-05	0.000189
rs13480351	rs3701829	0.00573	0.000138	0.00481
rs13480351	rs4198737	0.00445	0.000361	0.00309
rs13480367	rs3661495	0.00913	0.000829	0.00839
rs13480367	rs3671459	0.00512	0.000412	0.00304
rs13480367	rs3719360	0.00769	0.000564	0.00428
rs13480367	rs4192132	0.00142	0.000489	0.00149
rs13480367	rs4197416	0.00128	0.000703	0.00105
rs13480367	rs4197725	0.000402	0.000255	0.000348
rs13480367	rs4198737	0.000309	5e-05	0.000219
rs13480367	rs6335414	0.00506	0.000512	0.00367
rs13480387	rs13483382	0.00367	0.000255	0.00331
rs13480387	rs3671459	0.00635	0.000738	0.00543
rs13480387	rs3719360	0.00849	0.000891	0.00657
rs13480387	rs4198737	0.00127	0.000264	0.00102
rs13480454	rs13482637	0.00386	0.000334	0.00382
rs13480454	rs13483382	0.00955	0.000426	0.01
rs13480454	rs13483390	0.000878	4.65e-05	0.000885
rs13480454	rs13483394	0.00188	7.64e-05	0.00181
rs13480454	rs13483398	0.00234	8.06e-05	0.00207
rs13480454	rs3676033	0.00169	0.000661	0.00152
rs13480454	rs3676096	8.94e-05	8.32e-05	8.74e-05
rs13480454	rs3684754	0.00552	0.000982	0.00579
rs13480454	rs3688789	0.00264	0.000131	0.00201
rs13480454	rs3701623	0.000788	0.00118	0.000679
rs13480454	rs3701696	0.000218	5.53e-05	0.000194
rs13480454	rs3709946	0.00022	0.00019	0.000225
rs13480454	rs3714258	0.000396	0.000252	0.000384
rs13480454	rs6190354	0.000121	0.000154	0.000127
rs13480454	rs6195594	0.00165	0.000452	0.00144
rs13480454	rs6200333	0.00057	0.000536	0.000672
rs13480454	rs6204870	0.00496	0.000433	0.00482
rs13480454	rs6248036	9.01e-06	6.38e-06	1.81e-05
rs13480454	rs6249968	0.00113	0.000878	0.0011
rs13480454	rs6303304	0.0013	0.000426	0.00122
rs13480454	rs6410022	0.000173	0.00016	0.000183
rs13480510	rs13481632	0.00152	0.000677	0.00143
rs13480510	rs13481651	0.000273	0.000228	0.000278
rs13480510	rs3654706	0.000491	0.000266	0.000508
rs13480510	rs3709829	0.000495	0.000278	0.000513
rs13480510	rs3711281	0.000485	0.000293	0.000491
rs13480510	rs3719299	0.00034	0.000326	0.000327
rs13480510	rs3724260	0.000642	0.000405	0.000566
rs13480510	rs4229612	0.00052	0.000318	0.000539
rs13480510	rs6378343	0.00289	0.000976	0.00288
rs13480527	rs13481632	0.00287	0.000862	0.00265
rs13480527	rs3719299	0.000728	0.00161	0.000738
rs13480527	rs3724260	0.00252	0.000997	0.00224
rs13480531	rs13481651	0.00234	0.000946	0.00264
rs13480531	rs13482372	0.00195	0.000126	0.00188
rs13480531	rs3683221	0.00299	0.000232	0.00308
rs13480531	rs3724260	0.000965	0.000309	0.000912
rs13480536	rs13481651	0.00212	0.000859	0.00216
rs13480536	rs13482372	0.0015	0.000101	0.00142
rs13480536	rs3676033	0.0016	0.000465	0.0017
rs13480536	rs3683221	0.00253	0.000229	0.00249
rs13480536	rs3724260	0.000595	0.000285	0.000556
rs13480547	rs13481322	0.00116	0.00616	0.000847
rs13480601	rs3684732	0.0197	0.000683	0.015
rs13480601	rs6273176	0.00493	0.000542	0.00607
rs13480601	rs6287472	0.00323	2.95e-05	0.00178
rs13480601	rs6288205	0.00148	7.32e-06	0.000761
rs13480601	rs6410533	0.00279	4.32e-05	0.00164
rs13480630	rs3694793	0.0059	0.000788	0.00535
rs13480638	rs13481651	0.000785	0.000949	0.000691
rs13480638	rs3679276	0.000683	0.000568	0.000517
rs13480684	rs13482272	0.00297	0.000929	0.00278
rs13480687	rs13481641	0.00208	0.000231	0.00195
rs13480687	rs13481651	0.000471	4.51e-05	0.000455
rs13480687	rs13482536	0.00426	0.000118	0.00383
rs13480687	rs13482541	0.00269	7.6e-05	0.00233
rs13480687	rs3654706	0.000287	5.6e-05	0.000275
rs13480687	rs3663950	0.00348	0.000616	0.00347
rs13480687	rs3677296	0.0083	0.000901	0.00764
rs13480687	rs3679276	0.000613	0.000245	0.000571
rs13480687	rs3695416	0.00704	0.000578	0.00625
rs13480687	rs3709829	0.00043	5.57e-05	0.000418
rs13480687	rs3711281	0.00062	0.000281	0.000612
rs13480687	rs4224808	0.00876	0.000617	0.0082
rs13480687	rs4229612	0.000454	6.88e-05	0.000443
rs13480703	rs13481651	0.00651	0.000853	0.00578
rs13480703	rs13483144	0.00108	0.000401	0.000977
rs13480703	rs3654706	0.000761	0.000347	0.000793
rs13480703	rs3709829	0.001	0.000266	0.00102
rs13480703	rs4229612	0.00105	0.00032	0.00108
rs13480712	rs3723953	0.00363	0.000876	0.004
rs13480712	rs4198737	0.000198	1.97e-05	0.00033
rs13480712	rs4202372	0.00147	0.000513	0.00233
rs13480734	rs3663950	0.00964	0.000497	0.0106
rs13480739	rs3663950	0.0135	0.000821	0.0126
rs13480740	rs3663950	0.0135	0.000821	0.0126
rs13480752	rs3663950	0.00623	0.000419	0.00576
rs13480754	rs3663950	0.00568	0.000306	0.00527
rs13480766	rs3090765	0.00034	0.000275	0.000382
rs13480766	rs3687720	0.00037	0.000301	0.000419
rs13480766	rs3691374	0.00427	0.000965	0.00367
rs13480766	rs3716165	0.000369	0.000305	0.00042
rs13480766	rs4152386	0.002	0.000386	0.00178
rs13480766	rs6189020	0.000376	0.000279	0.00042
rs13480766	rs6228473	0.000724	0.00054	0.000781
rs13480773	rs3691374	0.00129	0.00055	0.00119
rs13480773	rs4228477	0.00059	0.000797	0.000625
rs13480773	rs6177803	0.00522	0.000209	0.00843
rs13480773	rs6201222	0.000552	0.000656	0.000538
rs13480773	rs6335076	0.00218	0.00171	0.000891
rs13480773	rs6363315	0.00218	0.00171	0.000891
rs13480792	rs13480793	0.000227	1.32e-05	0.000142
rs13480792	rs13480797	7.86e-05	3.23e-06	4.61e-05
rs13480792	rs13483183	0.00513	0.000286	0.00476
rs13480792	rs3659572	0.00023	1.67e-05	0.000175
rs13480792	rs4220529	0.0106	0.00061	0.00989
rs13480792	rs4220927	0.00582	0.000329	0.00549
rs13480792	rs6197175	0.000172	9.31e-06	0.000107
rs13480792	rs6197961	7.86e-05	3.23e-06	4.61e-05
rs13480792	rs6374927	0.000631	0.000733	0.000691
rs13480793	rs13480797	0.000289	3.02e-05	0.000224
rs13480793	rs3659572	0.000257	1.83e-05	0.000186
rs13480793	rs3686671	0.00386	0.000199	0.00328
rs13480793	rs3691374	0.00174	0.000327	0.00152
rs13480793	rs3694822	0.00317	0.000158	0.00271
rs13480793	rs3717360	0.00375	0.000197	0.00321
rs13480793	rs3719973	0.00983	0.00079	0.009
rs13480793	rs4230908	0.000478	0.002	0.000583
rs13480793	rs6197175	0.00058	7.08e-05	0.000473
rs13480793	rs6197961	0.000289	3.02e-05	0.000224
rs13480797	rs3090765	0.0028	0.000401	0.00267
rs13480797	rs3659572	7.1e-05	3.47e-06	4.84e-05
rs13480797	rs3664800	0.0189	0.000949	0.0183
rs13480797	rs3686671	0.0012	5.58e-05	0.00101
rs13480797	rs3687720	0.00277	0.000401	0.00265
rs13480797	rs3691374	0.000817	0.000143	0.000674
rs13480797	rs3694226	0.00703	0.000646	0.00655
rs13480797	rs3694822	0.000966	4.32e-05	0.000814
rs13480797	rs3695581	0.00703	0.000646	0.00655
rs13480797	rs3716165	0.00275	0.000397	0.00264
rs13480797	rs3717360	0.00117	5.52e-05	0.000989
rs13480797	rs3719973	0.0031	0.000216	0.00293
rs13480797	rs6189020	0.00306	0.000422	0.00291
rs13480797	rs6197175	0.000333	2.81e-05	0.000215
rs13480797	rs6228473	0.00624	0.000927	0.00581
rs13480797	rs6317716	0.0015	0.000216	0.00138
rs13480993	rs13481135	0.00274	0.000353	0.00249
rs13480993	rs3719581	0.0044	0.000551	0.00359
rs13481050	rs13483356	0.000878	0.000337	0.000933
rs13481050	rs3705890	0.000254	0.000154	0.000301
rs13481068	rs3705890	0.00286	0.000996	0.00234
rs13481090	rs3022993	0.000947	0.000314	0.00096
rs13481090	rs3687391	0.00236	0.000815	0.00253
rs13481090	rs4152386	0.00874	0.000859	0.0095
rs13481090	rs4152838	0.0048	0.000424	0.00542
rs13481093	rs3022993	0.00218	0.000605	0.00267
rs13481093	rs4152386	0.0111	0.00098	0.0113
rs13481093	rs4152838	0.00632	0.000502	0.00668
rs13481102	rs4152838	0.0135	0.000785	0.0119
rs13481135	rs3660692	0.0114	0.000695	0.0116
rs13481161	rs6377710	0.0131	0.000843	0.0119
rs13481220	rs13481849	0.00364	0.000147	0.00317
rs13481220	rs3718727	0.0223	0.000886	0.0184
rs13481220	rs3720797	0.00281	7.95e-05	0.00239
rs13481220	rs4229817	0.00176	3.51e-05	0.00146
rs13481220	rs6410679	0.00421	0.000205	0.00379
rs13481228	rs13481849	0.00125	0.000162	0.0012
rs13481228	rs3720797	0.00127	0.000127	0.0012
rs13481228	rs4229817	0.000973	6.51e-05	0.000885
rs13481228	rs6410679	0.00146	0.000236	0.00146
rs13481288	rs3691763	0.00098	0.00916	0.00141
rs13481308	rs3659688	0.00356	0.000955	0.00327
rs13481308	rs3659866	0.00309	0.000806	0.00293
rs13481308	rs3685286	0.00412	0.000943	0.00377
rs13481308	rs3715136	0.00356	0.000955	0.00327
rs13481308	rs6243021	0.00264	0.000603	0.00263
rs13481308	UT.2.93.461287	0.000201	7.44e-05	0.000196
rs13481322	rs3686671	0.00233	0.00077	0.00238
rs13481322	rs3694822	0.00143	0.000581	0.00147
rs13481322	rs3717360	0.00195	0.000696	0.00201
rs13481361	rs4232174	0.000888	0.000766	0.000998
rs13481375	rs3664301	0.00337	0.00091	0.00299
rs13481375	rs3686671	0.000509	0.000187	0.000442
rs13481375	rs3692731	0.00203	0.000511	0.00176
rs13481375	rs3694226	0.00109	0.000392	0.000952
rs13481375	rs3694822	0.00066	0.000251	0.000583
rs13481375	rs3695581	0.00109	0.000392	0.000952
rs13481375	rs3717360	0.000503	0.000187	0.000443
rs13481375	rs3719973	0.000421	0.000123	0.000383
rs13481499	rs13482691	0.00757	0.000757	0.00537
rs13481499	rs3660367	0.00148	3.69e-05	0.000877
rs13481499	rs4230908	0.00956	0.000905	0.00803
rs13481499	rs4230930	0.00218	7.88e-05	0.00132
rs13481511	rs3660367	0.00501	0.000372	0.00415
rs13481511	rs4230908	0.00397	0.000418	0.00398
rs13481511	rs4230930	0.00937	0.000927	0.00789
rs13481514	rs3089046	0.000859	0.00473	0.000991
rs13481514	rs3660367	0.00723	0.000255	0.00557
rs13481514	rs3708227	0.000732	0.000726	0.000813
rs13481514	rs4230908	0.00533	0.00031	0.0052
rs13481514	rs4230930	0.0132	0.000662	0.0104
rs13481538	rs6243167	0.00338	0.00044	0.00339
rs13481561	rs3677161	0.000611	5.65e-05	0.000559
rs13481561	rs3698956	0.00774	0.000956	0.00712
rs13481561	rs4138996	0.00223	0.000181	0.00196
rs13481571	rs6164020	0.00449	0.000899	0.00315
rs13481571	rs6186864	0.00192	0.000331	0.00131
rs13481571	rs6243167	0.00211	0.000357	0.00171
rs13481571	UT.2.158.095429	0.00372	0.000567	0.0048
rs13481575	rs3677161	0.00168	0.000743	0.00167
rs13481575	rs6243167	0.00452	0.000931	0.00375
rs13481618	rs13481651	0.000899	0.000797	0.000996
rs13481618	rs3023061	0.00143	0.000401	0.00171
rs13481632	rs4219239	0.00318	0.000481	0.00376
rs13481636	rs13482691	0.002	0.000331	0.0016
rs13481636	rs13482693	0.00288	0.000825	0.00324
rs13481636	rs4219239	0.00192	0.000214	0.00225
rs13481636	rs4230930	0.00133	0.000773	0.00146
rs13481641	rs13482654	0.000928	0.0022	0.00121
rs13481641	rs13482691	0.00021	2.33e-05	0.000167
rs13481641	rs13482693	0.000405	6.48e-05	0.000413
rs13481641	rs13482719	0.000997	0.000751	0.000981
rs13481641	rs13483569	0.00561	0.000974	0.00512
rs13481641	rs3088752	0.00747	0.000822	0.00714
rs13481641	rs3660367	0.000355	0.000251	0.000359
rs13481641	rs3720897	0.00071	0.000331	0.000711
rs13481641	rs3720931	0.00102	0.000245	0.00119
rs13481641	rs3723790	0.00146	0.000938	0.00149
rs13481641	rs4219239	0.00307	0.000202	0.00347
rs13481641	rs4230930	0.000169	0.000115	0.000173
rs13481641	rs6185704	0.00154	0.000369	0.00147
rs13481641	rs6287697	0.00225	0.000843	0.00245
rs13481651	rs13482654	0.000119	0.000239	0.000159
rs13481651	rs13482691	0.000106	6.36e-06	8.88e-05
rs13481651	rs13482693	0.00101	8.97e-05	0.00109
rs13481651	rs13482711	0.00253	0.000798	0.00231
rs13481651	rs13482719	0.000371	0.000337	0.000377
rs13481651	rs13483569	0.00293	0.00025	0.00261
rs13481651	rs3088752	0.0119	0.000502	0.0113
rs13481651	rs3660192	0.000367	0.000275	0.000497
rs13481651	rs3660367	2.97e-05	1.67e-05	2.99e-05
rs13481651	rs3701829	0.00406	0.000702	0.00337
rs13481651	rs3720897	0.000345	9.44e-05	0.000356
rs13481651	rs3720931	0.00126	0.000346	0.0015
rs13481651	rs3723790	0.000948	0.00083	0.00108
rs13481651	rs4224426	0.000721	0.000787	0.000703
rs13481651	rs4230930	1.25e-05	6.65e-06	1.28e-05
rs13481651	rs6245242	0.00444	0.000805	0.00426
rs13481651	rs6342493	0.00293	0.000281	0.00259
rs13481669	rs3680197	0.00505	0.000178	0.00558
rs13481669	rs6299045	0.00919	0.000909	0.00777
rs13481669	rs6313371	0.0011	2.23e-05	0.00108
rs13481689	rs4175608	0.000473	0.000158	0.000484
rs13481689	rs4178513	0.0012	0.000957	0.00134
rs13481689	rs6313371	0.00633	0.000212	0.00606
rs13481702	rs3680197	0.0146	0.000435	0.0186
rs13481702	rs6313371	0.00378	6.56e-05	0.00423
rs13481702	rs8263587	0.00948	0.000561	0.00953
rs13481706	rs4174469	0.01	0.000829	0.00937
rs13481706	rs4175608	0.000919	6.79e-05	0.000882
rs13481706	rs4177203	0.00201	0.000469	0.00218
rs13481706	rs4178513	0.00127	0.000289	0.00132
rs13481706	rs6295014	0.0109	0.000663	0.011
rs13481706	rs6313371	0.0135	0.000207	0.0135
rs13481706	rs8263587	0.00125	4.24e-05	0.0013
rs13481727	rs4178513	0.0024	0.000963	0.00217
rs13481777	rs3707274	0.000177	0.000108	0.00019
rs13481777	rs3710499	0.00061	0.000249	0.000656
rs13481777	rs4203891	0.000962	0.000429	0.000978
rs13481777	rs4205524	0.000787	0.000479	0.000779
rs13481777	UT.11.29.443258	0.00147	0.000807	0.00154
rs13481789	rs3023105	0.0009	0.00172	0.000937
rs13481789	rs3712253	0.000664	0.00141	0.000719
rs13481789	rs6265387	0.000664	0.00141	0.000719
rs13481849	rs3683086	0.00793	0.00069	0.00729
rs13481947	rs13482654	0.0048	0.000751	0.00602
rs13481947	rs3022886	0.000929	5.22e-05	0.000951
rs13481947	rs3718711	0.000758	0.000135	0.000736
rs13481947	rs6247544	0.00195	0.00061	0.00195
rs13481947	rs8263587	0.00147	0.00026	0.00141
rs13481958	rs3660290	0.00518	0.000581	0.00485
rs13481958	rs3692040	0.00517	0.000582	0.00485
rs13481958	rs3718711	0.000766	0.000266	0.000718
rs13481958	rs6165881	0.00656	0.000569	0.0061
rs13481958	rs8263587	0.0038	0.000655	0.00326
rs13481964	rs13482558	0.0102	0.000411	0.00917
rs13481964	rs13482580	0.00377	0.000165	0.00357
rs13481964	rs13482589	0.00192	0.000143	0.00169
rs13481964	rs13482618	0.00694	0.000976	0.00684
rs13481964	rs3022886	0.00636	0.000467	0.00576
rs13481964	rs3654706	0.0124	0.000841	0.0117
rs13481964	rs3660290	0.000643	4.8e-05	0.000638
rs13481964	rs3692040	0.000642	4.8e-05	0.000637
rs13481964	rs3709829	0.0154	0.0007	0.0146
rs13481964	rs3718711	0.00078	0.000143	0.000723
rs13481964	rs4138760	0.0101	0.000407	0.00907
rs13481964	rs4229612	0.0153	0.000684	0.0145
rs13481964	rs6165881	0.000915	5.11e-05	0.000885
rs13481964	rs6247544	0.00198	0.000617	0.00186
rs13481964	rs8263587	0.00601	0.000946	0.00545
rs13481990	rs13482536	0.00203	0.000405	0.00215
rs13481990	rs13482541	0.00105	0.000252	0.00113
rs13481990	rs13482558	0.00408	0.000284	0.00432
rs13481990	rs13482580	0.000598	3.95e-05	0.00062
rs13481990	rs13482589	0.000913	7.06e-05	0.000837
rs13481990	rs13482595	0.000545	8.39e-05	0.000579
rs13481990	rs13482612	0.00104	9.14e-05	0.00111
rs13481990	rs13482618	0.000752	6.29e-05	0.000834
rs13481990	rs13482628	0.000458	1.72e-05	0.000492
rs13481990	rs13483569	0.00431	0.000649	0.00386
rs13481990	rs13483577	0.000487	0.000262	0.000543
rs13481990	rs3654559	0.000886	8.39e-05	0.000905
rs13481990	rs3660290	0.000257	1.32e-05	0.000271
rs13481990	rs3674721	0.0069	0.000461	0.00647
rs13481990	rs3677296	0.00202	0.000169	0.0022
rs13481990	rs3683495	0.00101	0.000116	0.00107
rs13481990	rs3692040	0.000251	1.29e-05	0.000264
rs13481990	rs3695416	0.00226	0.000221	0.00247
rs13481990	rs3714482	0.000921	0.000436	0.000965
rs13481990	rs3715478	0.00325	0.000284	0.003
rs13481990	rs4138760	0.00407	0.000283	0.00431
rs13481990	rs6165881	0.000169	8.31e-06	0.000172
rs13481990	rs6197332	0.000706	2.74e-05	0.00076
rs13481990	rs6220079	0.00187	0.00016	0.00162
rs13481990	rs6275228	0.00272	0.000181	0.00254
rs13481990	rs6291559	0.000861	0.00028	0.000896
rs13481990	rs6295014	0.00212	0.000486	0.00214
rs13481990	rs6400804	0.000407	0.000177	0.000437
rs13481990	rs6406705	0.0026	0.000156	0.00218
rs13481990	rs8236684	0.000465	0.000105	0.000435
rs13481990	rs8238755	0.00129	0.00113	0.0009
rs13481990	rs8263587	0.00218	0.000374	0.00204
rs13482000	rs3023233	0.00849	0.000793	0.00708
rs13482000	rs3674721	0.001	0.000127	0.00111
rs13482000	rs3708146	0.00281	0.000896	0.00234
rs13482000	rs3714482	0.000972	0.000986	0.000887
rs13482000	rs3715478	0.000649	0.00013	0.000747
rs13482000	rs6220079	0.00372	0.000848	0.00397
rs13482000	rs6275228	0.000389	4.63e-05	0.000436
rs13482000	rs6295014	0.00105	0.000494	0.00116
rs13482000	rs6345126	0.00357	0.000903	0.00363
rs13482000	rs6406705	0.000493	5.26e-05	0.00053
rs13482000	rs8236684	0.00535	0.000965	0.00479
rs13482000	rs8263587	0.000616	0.000182	0.000697
rs13482028	rs13482366	0.00242	0.000345	0.00224
rs13482028	rs13482372	0.00232	0.000292	0.0021
rs13482028	rs13482386	0.00684	0.000686	0.00664
rs13482028	rs3023233	0.00349	0.000615	0.00362
rs13482028	rs3683221	0.00321	0.000368	0.00305
rs13482028	rs3707842	0.00281	0.000537	0.00304
rs13482028	rs6211694	0.0033	0.000394	0.00297
rs13482028	rs6295014	0.00162	0.000898	0.00161
rs13482032	rs13482366	0.00285	0.0004	0.00275
rs13482032	rs13482372	0.00318	0.000393	0.00287
rs13482032	rs3683221	0.00577	0.000723	0.00541
rs13482032	rs3707642	0.00141	0.000866	0.00189
rs13482032	rs3713281	0.000574	0.000424	0.000748
rs13482032	rs4137502	0.000806	0.000443	0.00109
rs13482032	rs6211694	0.00395	0.000471	0.00372
rs13482032	rs6361963	0.00197	0.000601	0.00176
rs13482143	rs6186115	0.0166	0.000699	0.0146
rs13482143	rs6382880	0.0142	0.000692	0.0131
rs13482191	rs3656074	0.00316	0.00051	0.00261
rs13482191	rs6296859	0.000442	0.000448	0.000638
rs13482206	rs3667441	0.00178	0.000713	0.00163
rs13482206	rs3676254	0.00038	9.03e-05	0.000282
rs13482206	rs3679779	0.00272	0.000822	0.00218
rs13482206	rs3693478	0.00221	0.000677	0.00175
rs13482206	rs3723790	0.00314	0.000586	0.00314
rs13482206	rs6160140	0.00206	0.000644	0.00187
rs13482206	rs6296859	0.000798	0.000229	0.000585
rs13482254	rs13482635	0.000816	8.02e-05	0.000728
rs13482254	rs13482642	0.00251	0.000756	0.0024
rs13482254	rs3672639	0.00137	9.45e-05	0.00133
rs13482254	rs6394046	0.00744	0.000703	0.00572
rs13482254	rs6398181	0.0013	9.22e-05	0.00127
rs13482254	rs8241505	0.00139	0.000827	0.00089
rs13482256	rs13482635	0.000816	8.02e-05	0.000728
rs13482256	rs13482642	0.00251	0.000756	0.0024
rs13482256	rs3672639	0.00137	9.45e-05	0.00133
rs13482256	rs6394046	0.00744	0.000703	0.00572
rs13482256	rs6398181	0.0013	9.22e-05	0.00127
rs13482256	rs8241505	0.00139	0.000827	0.00089
rs13482262	rs13482635	0.00357	0.000549	0.0033
rs13482262	rs3672639	0.00338	0.000382	0.00336
rs13482262	rs6398181	0.00323	0.000374	0.0032
rs13482269	rs13482635	0.00314	0.000434	0.00277
rs13482269	rs13482642	0.00299	0.000833	0.00276
rs13482269	rs3672639	0.00494	0.000588	0.00501
rs13482269	rs3689409	0.0132	0.00098	0.012
rs13482269	rs4230930	0.00345	0.00049	0.00288
rs13482269	rs6398181	0.0047	0.000572	0.00475
rs13482272	rs13482635	0.0035	0.000441	0.00305
rs13482272	rs13482642	0.00337	0.000855	0.00306
rs13482272	rs3672639	0.0038	0.000449	0.0039
rs13482272	rs3689409	0.0139	0.000978	0.0126
rs13482272	rs4230930	0.00355	0.000468	0.00291
rs13482272	rs6398181	0.00361	0.000436	0.0037
rs13482276	rs13482642	0.00147	0.000803	0.00151
rs13482276	rs3022993	0.00459	0.000919	0.00456
rs13482276	rs3660367	0.0043	0.000862	0.00374
rs13482276	rs3677132	0.0053	0.000559	0.00515
rs13482276	rs3689409	0.00478	0.000117	0.00409
rs13482276	rs3719256	0.0138	0.000937	0.0124
rs13482276	rs3723790	0.00784	0.000836	0.00721
rs13482276	rs4230908	0.00147	0.000433	0.00172
rs13482276	rs4230930	0.000963	0.000133	0.000829
rs13482276	rs4232449	0.00452	0.000249	0.00403
rs13482276	rs6217275	0.00781	0.00074	0.00633
rs13482276	rs6316536	0.00704	0.000428	0.0066
rs13482281	rs3676254	0.00169	0.000542	0.000828
rs13482281	rs3677132	0.00342	0.000266	0.00333
rs13482281	rs3689409	0.00899	0.000284	0.0079
rs13482281	rs3723790	0.00615	0.000554	0.00535
rs13482281	rs4230908	0.00246	0.000818	0.00294
rs13482281	rs4230930	0.0016	0.000274	0.00147
[truncated: 1,163 more rows]
